# Supplementary material for: PDZ-directed substrate recruitment is the primary determinant of specific 4E- BP1 dephosphorylation by PP1-Neurabin
Source: bioRxiv preprint, doi:10.1101/2024.09.23.614477, version 2 (2025-02-17)
Supplement: Supplementary Table 2 [file 614477_file04.xlsx]

## Sheet: Legend
Legend
A. Phosphoproteomics raw intensities	raw intensities as produced by MaxQuant analysis
B. Phosphoproteomics processed data	cleaned-up and normalised data used for further analyses
C. PP1 vs empty	quantification of phosphorylation site preferences for PP1
D. Phactrs vs PP1	substrate preferences of Phactr1-4-PP1 fusions as opposed to PP1
E. other PIPs	identification of substrates for Neurabin, Spinophilin, PNUTS, R15A and R15B fusions
F. Total proteomics	raw data and enrichment of proteins in the PP1-Neurabin samples

## Sheet: A. Phosphoproteomics raw data
Gene names	Protein names	Position	Sequence window	Phospho (STY) Probabilities	Number of Phospho (STY)	PP1-MS2-rep1	Ph1-MS2-rep1	Ph2-MS2-rep1	Ph3-MS2-rep1	Ph4-MS2-rep1	SPN-MS2-rep1	NEB-MS2-rep1	15A-MS2-rep1	15B-MS2-rep1	PNUTS-MS2-rep1	EMPTY-MS2-rep1	PP1-MS3-rep1	Ph1-MS3-rep1	Ph2-MS3-rep1	Ph3-MS3-rep1	Ph4-MS3-rep1	SPN-MS3-rep1	NEB-MS3-rep1	15A-MS3-rep1	15B-MS3-rep1	PNUTS-MS3-rep1	EMPTY-MS3-rep1	PP1-MS2-rep2	Ph1-MS2-rep2	Ph2-MS2-rep2	Ph3-MS2-rep2	Ph4-MS2-rep2	SPN-MS2-rep2	NEB-MS2-rep2	15A-MS2-rep2	15B-MS2-rep2	PNUTS-MS2-rep2	EMPTY-MS2-rep2	PP1-MS3-rep2	Ph1-MS3-rep2	Ph2-MS3-rep2	Ph3-MS3-rep2	Ph4-MS3-rep2	SPN-MS3-rep2	NEB-MS3-rep2	15A-MS3-rep2	15B-MS3-rep2	PNUTS-MS3-rep2	EMPTY-MS3-rep2
HDLBP	Vigilin	1237	PSRGFVVRDAPWTASSSEKAPDMSSSEEFPS	DAPWT(0.001)AS(0.019)S(0.979)S(0.002)EK	1	NaN	NaN	NaN	NaN	NaN	NaN	NaN	NaN	NaN	NaN	NaN	NaN	NaN	NaN	NaN	NaN	NaN	NaN	NaN	NaN	NaN	NaN	NaN	NaN	NaN	NaN	NaN	NaN	NaN	NaN	NaN	NaN	NaN	20.1922	20.1353	19.8145	20.1034	19.831	20.5413	20.3007	20.0626	20.0399	20.5927	19.9711
HDLBP	Vigilin	944	DEAGEGREAKDCDPGSPRRCDIIIISGRKEK	DCDPGS(1)PRR	1	21.4138	21.607	21.5793	21.6276	21.5526	21.8724	21.7268	21.576	21.8612	21.5715	21.6123	22.4589	22.6907	22.6975	22.6274	22.5981	22.775	22.7603	22.6399	22.8563	22.6196	22.5785	21.3612	21.2573	21.3883	21.2752	21.1648	21.3814	21.4182	21.3744	21.2159	21.4587	21.2649	21.5712	21.6529	21.6951	21.5989	21.5392	21.6696	21.7007	21.6393	21.4977	21.6448	21.5629
HDLBP	Vigilin	31	RSGLVPQQIKVATLNSEEESDPPTYKDAFPP	VATLNS(1)EEESDPPTYK	1	17.8173	17.4689	17.1266	17.3936	17.4612	18.1041	17.9915	17.9395	18.1007	18.022	18.06	21.4951	20.518	20.1843	20.7099	20.9816	21.4914	21.7471	21.7	21.904	21.552	21.7315	18.0006	17.6545	17.321	17.5241	17.5659	17.9977	17.8713	18.2372	17.7271	18.0676	17.7853	20.9749	20.1258	19.7297	20.1284	20.1195	20.7975	20.8598	21.0257	20.804	20.8284	20.8103
HDLBP	Vigilin	35	VPQQIKVATLNSEEESDPPTYKDAFPPLPEK	VATLNSEEES(0.999)DPPTYK	1	NaN	NaN	NaN	NaN	NaN	NaN	NaN	NaN	NaN	NaN	NaN	NaN	NaN	NaN	NaN	NaN	NaN	NaN	NaN	NaN	NaN	NaN	18.4859	17.9719	17.5101	17.8438	17.9685	18.5297	18.6977	18.7166	18.3227	18.4586	18.4446	NaN	NaN	NaN	NaN	NaN	NaN	NaN	NaN	NaN	NaN	NaN
EHD1	EH domain-containing protein 1	470	VGKDKPTYDEIFYTLSPVNGKITGANAKKEM	DKPTYDEIFYTLS(1)PVNGK	1	20.2937	21.463	20.8369	20.8855	20.5741	20.9059	20.6839	20.0042	20.5009	20.4764	20.1632	21.5341	22.6075	21.9639	22.1067	21.7492	21.9193	21.7494	21.0262	21.4665	21.5046	21.1014	17.58	18.2703	17.7	17.633	17.299	17.8952	17.5255	16.8851	17.2315	17.5332	17.152	19.641	20.1458	19.6138	19.5704	19.1822	19.7605	19.477	18.7729	19.1534	19.3057	18.7928
YTHDF3;YTHDF1;YTHDF2	YTH domain-containing family protein 3;YTH domain-containing family protein 1;YTH domain-containing family protein 2	419	DWNLKHGRVFIIKSYSEDDIHRSIKYNIWCS;DWNLKNGRVFIIKSYSEDDIHRSIKYSIWCS;EWNLKSGRVFIIKSYSEDDIHRSIKYSIWCS	S(0.002)YS(0.998)EDDIHR	1	18.5386	19.1866	19.2113	19.0391	19.2563	18.6081	18.9173	18.6755	18.7206	18.8697	18.7586	NaN	NaN	NaN	NaN	NaN	NaN	NaN	NaN	NaN	NaN	NaN	NaN	NaN	NaN	NaN	NaN	NaN	NaN	NaN	NaN	NaN	NaN	NaN	NaN	NaN	NaN	NaN	NaN	NaN	NaN	NaN	NaN	NaN
PSMA2	Proteasome subunit alpha type;Proteasome subunit alpha type-2	7	_________MAERGYSFSLTTFSPSGKLVQI	GYS(1)FSLTTFSPSGK	1	NaN	NaN	NaN	NaN	NaN	NaN	NaN	NaN	NaN	NaN	NaN	19.7376	19.9603	19.6824	19.8682	19.9808	20.1954	19.9106	19.903	19.9376	19.8673	20.0051	19.1092	19.1125	19.0262	18.931	18.8748	18.9263	18.9378	18.764	18.7979	18.931	18.8556	19.1654	18.8059	19.4023	19.0726	18.9445	19.1224	19.4186	19.0758	19.0796	19.3892	19.0334
PSMA2	Proteasome subunit alpha type;Proteasome subunit alpha type-2	9	_______MAERGYSFSLTTFSPSGKLVQIEY	AERGY(0.216)S(0.256)FS(0.525)LT(0.002)TFSPSGK	1	19.6656	19.6876	19.4259	19.4117	19.6089	19.7196	19.6243	19.1384	19.5871	19.5811	19.4041	NaN	NaN	NaN	NaN	NaN	NaN	NaN	NaN	NaN	NaN	NaN	NaN	NaN	NaN	NaN	NaN	NaN	NaN	NaN	NaN	NaN	NaN	NaN	NaN	NaN	NaN	NaN	NaN	NaN	NaN	NaN	NaN	NaN
TCEB3	Transcription elongation factor B polypeptide 3	515	SLELISSFQPKRKAFSSPQEEEEAGFTGRRM	AFS(0.534)S(0.465)PQEEEEAGFT(0.001)GRR	1	NaN	NaN	NaN	NaN	NaN	NaN	NaN	NaN	NaN	NaN	NaN	18.7828	19.314	18.7873	19.3481	19.1912	18.453	19.2956	19.0301	19.3826	19.4621	19.2714	17.2773	17.183	16.5402	17.016	16.7208	17.6133	17.3162	17.0017	16.9863	16.9916	16.6119	NaN	NaN	NaN	NaN	NaN	NaN	NaN	NaN	NaN	NaN	NaN
TCEB3	Transcription elongation factor B polypeptide 3	516	LELISSFQPKRKAFSSPQEEEEAGFTGRRMN	AFS(0.002)S(0.998)PQEEEEAGFTGRR	1	18.8479	18.9855	18.6886	18.9313	18.5208	19.0865	19.0837	18.5128	18.7868	18.875	18.6259	20.1729	20.1327	20.1005	20.1092	19.9489	20.6846	20.3648	19.9876	20.3659	20.1646	19.7883	19.7753	19.4868	19.1728	19.3344	19.1667	19.9129	19.845	19.4015	19.165	19.4954	19.2165	20.9058	20.9223	20.6371	20.7223	20.797	21.0018	20.8867	20.8767	20.5967	20.9884	20.5021
TCEB3	Transcription elongation factor B polypeptide 3	307	KPPSSGVKKEKDREGSSLKKKCLPPSEAASD	DREGS(0.584)S(0.416)LK	1	NaN	NaN	NaN	NaN	NaN	NaN	NaN	NaN	NaN	NaN	NaN	NaN	NaN	NaN	NaN	NaN	NaN	NaN	NaN	NaN	NaN	NaN	NaN	NaN	NaN	NaN	NaN	NaN	NaN	NaN	NaN	NaN	NaN	NaN	NaN	NaN	NaN	NaN	NaN	NaN	NaN	NaN	NaN	NaN
TCEB3	Transcription elongation factor B polypeptide 3	308	PPSSGVKKEKDREGSSLKKKCLPPSEAASDN	DREGS(0.043)S(0.957)LK	1	NaN	NaN	NaN	NaN	NaN	NaN	NaN	NaN	NaN	NaN	NaN	NaN	NaN	NaN	NaN	NaN	NaN	NaN	NaN	NaN	NaN	NaN	20.1837	20.1272	19.5366	19.5476	19.343	20.5498	20.272	19.6659	19.748	20.1839	19.5093	19.4022	19.1926	18.555	18.876	18.6822	19.7715	19.632	18.8739	19.0178	19.4351	18.8896
TCEB3	Transcription elongation factor B polypeptide 3	225	PGKGHSNAFQDRLGASQERHLGEPHGKGVVS	LGAS(1)QERHLGEPHGK	1	17.084	16.3461	16.4056	16.4366	16.5155	16.8441	16.964	17.1409	17.2185	17.3783	16.9515	16.923	16.9228	16.9657	16.5924	16.8564	17.4519	16.952	16.9408	16.7722	16.9665	16.7959	17.7899	17.0152	17.1967	17.2591	16.9078	17.7526	17.8827	17.6856	17.7078	17.9374	17.5503	19.6637	19.3401	19.1595	19.2639	19.2223	19.8092	19.9266	19.7579	19.7017	19.9258	19.4816
TCEB3	Transcription elongation factor B polypeptide 3	259	EHKSSHKDKRPVDAKSDEKASVVSREKSHKA	RPVDAKS(1)DEK	1	NaN	NaN	NaN	NaN	NaN	NaN	NaN	NaN	NaN	NaN	NaN	NaN	NaN	NaN	NaN	NaN	NaN	NaN	NaN	NaN	NaN	NaN	NaN	NaN	NaN	NaN	NaN	NaN	NaN	NaN	NaN	NaN	NaN	18.6438	18.496	18.4029	18.6549	17.9904	18.7393	18.6871	18.7424	18.5678	18.4899	18.4532
TCEB3	Transcription elongation factor B polypeptide 3	384	LKTPEGKVKTNLDRKSLGSLPKVEETDMEDE	S(1)LGSLPK	1	NaN	NaN	NaN	NaN	NaN	NaN	NaN	NaN	NaN	NaN	NaN	NaN	NaN	NaN	NaN	NaN	NaN	NaN	NaN	NaN	NaN	NaN	19.1387	19.8707	19.0674	19.163	18.4847	19.4212	19.5423	18.8633	18.9432	19.1291	18.8938	19.7299	20.468	19.6822	19.7797	18.8106	19.9976	19.8516	19.6161	19.6141	19.5322	19.2055
TCEB3	Transcription elongation factor B polypeptide 3	123	MEGDYQETWKATGSRSYSPDHRQKKHRKLSE	S(0.546)Y(0.019)S(0.434)PDHRQK	1	NaN	NaN	NaN	NaN	NaN	NaN	NaN	NaN	NaN	NaN	NaN	19.2127	19.386	19.2132	18.8257	19.0294	19.6331	19.1459	19.2829	19.3009	19.1841	19.2255	NaN	NaN	NaN	NaN	NaN	NaN	NaN	NaN	NaN	NaN	NaN	NaN	NaN	NaN	NaN	NaN	NaN	NaN	NaN	NaN	NaN	NaN
TCEB3	Transcription elongation factor B polypeptide 3	125	GDYQETWKATGSRSYSPDHRQKKHRKLSELE	SYS(1)PDHR	1	24.1908	24.0969	24.0816	24.0144	23.9766	23.9747	24.1627	24.1953	24.3209	24.2157	24.1876	23.8202	23.7546	23.7889	23.6232	23.5795	24.3124	23.8247	23.9169	23.9407	23.8163	23.8952	23.9916	23.9859	23.6484	23.7228	23.7916	24.0687	23.6564	23.9842	23.6877	23.6337	23.8317	24.1556	24.0768	23.8244	23.8928	23.8827	24.1592	24.0984	24.1986	23.8117	24.0719	23.8619
BAG6;BAT3	Large proline-rich protein BAG6	1111	AVSRAAKAAGARPLTSPESLSRDLEAPEVQE	AAGARPLT(0.003)S(0.997)PESLSR	1	20.8134	20.9179	20.7848	20.7089	20.865	20.323	20.6171	20.2459	20.7537	20.7163	20.5182	22.8907	23.0826	22.8687	22.8898	23.0846	22.6732	22.6632	22.7742	23.0369	22.9373	22.597	NaN	NaN	NaN	NaN	NaN	NaN	NaN	NaN	NaN	NaN	NaN	22.1112	22.292	22.181	21.9533	21.985	21.9442	22.0604	21.8431	21.7955	22.0427	21.6251
BAG6;BAT3	Large proline-rich protein BAG6	113	ASSGTGSASATHGGGSPPGTRGPGASVHDRN	APPQTHLPSGASSGTGSASATHGGGS(0.999)PPGT(0.001)RGPGAS(0.001)VHDR	1	15.2448	15.7604	15.8173	15.1913	15.2506	15.745	15.1925	15.1016	15.4117	15.0345	14.9131	20.9089	21.287	21.2123	20.8715	20.9463	20.4243	20.8692	20.5368	20.8535	20.7193	20.6557	NaN	NaN	NaN	NaN	NaN	NaN	NaN	NaN	NaN	NaN	NaN	16.9875	17.9721	15.8719	16.3698	16.9319	17.0779	15.5653	16.4451	15.7703	15.6941	15.2889
BAG6;BAT3	Large proline-rich protein BAG6	994	PLPEEPMEVQGAERASPEPQRENASPAPGTT	VGDPPQPLPEEPMEVQGAERAS(1)PEPQR	1	18.059	17.9938	18.185	18.2389	18.1566	18.3831	18.3551	18.0714	18.4522	18.3782	18.4515	17.551	16.7835	16.9376	17.4701	17.2037	16.9309	17.1914	17.6595	17.4704	17.64	17.413	16.3824	16.5288	16.6474	16.4181	16.6168	16.6694	16.7239	16.817	16.4243	16.6832	16.6287	NaN	NaN	NaN	NaN	NaN	NaN	NaN	NaN	NaN	NaN	NaN
BAG6;BAT3	Large proline-rich protein BAG6	1003	QGAERASPEPQRENASPAPGTTAEEAMSRGP	ASPEPQRENAS(1)PAPGTTAEEAMSR	1	20.1888	21.2399	20.9594	20.9087	20.9243	20.4546	20.4306	20.6367	20.8564	20.5887	20.6704	21.1062	22.2875	22.0488	22.1519	21.8381	21.674	21.6805	21.6195	21.8165	21.6415	21.7618	19.754	20.4362	20.3205	20.0871	19.9246	19.6426	19.7114	19.7704	19.6918	19.837	19.6906	20.8948	21.3625	21.3235	21.2229	20.9261	21.0535	21.2783	21.2885	21.0086	21.2161	21.0731
BAG6;BAT3	Large proline-rich protein BAG6	1147	LRSDIQKRLQEDPNYSPQRFPNAQRAFADDP	RLQEDPNYS(1)PQRFPNAQR	1	20.5005	20.9733	20.532	20.6504	20.67	22.0489	20.7924	20.5692	20.964	20.7608	20.712	21.594	22.1014	21.7669	21.8165	21.8384	22.8338	21.6859	21.6059	21.8497	21.69	21.5265	20.4476	20.6927	20.5798	20.3188	20.2441	20.2388	20.4016	20.1326	20.3116	20.5538	20.2138	22.1703	22.5215	22.2346	22.0506	21.9989	22.17	21.9375	21.948	21.9414	22.0173	21.6652
AUTS2	Autism susceptibility gene 2 protein	777	RRTTPLSAEIRERPPSHTLKDIEAR______	ERPPS(0.99)HT(0.01)LK	1	NaN	NaN	NaN	NaN	NaN	NaN	NaN	NaN	NaN	NaN	NaN	20.0579	20.5094	20.2214	20.2574	20.3086	20.6746	20.5794	20.196	20.7188	20.3158	20.4941	18.1137	18.2137	18.1513	18.1322	17.9805	18.234	18.3121	18.2665	18.1565	18.261	18.3218	18.1638	18.3081	18.3758	18.2988	18.4263	18.4097	18.5252	18.6845	18.2938	18.3649	18.551
AUTS2	Autism susceptibility gene 2 protein	725	SLITPGLPSMHYPRISPTAGNQNGLLNKTPP	IS(1)PTAGNQNGLLNK	1	16.9421	17.2462	17.1747	17.0431	16.9415	17.5369	17.4668	17.1555	17.2301	16.9645	17.2836	17.5564	17.9281	18.0003	18.0312	17.8678	17.8366	18.2052	17.775	18.1788	17.7555	18.17	16.8047	16.7973	16.9265	16.8348	16.7569	16.9796	17.0119	16.7588	16.403	16.8823	16.6004	17.8837	17.8965	18.1259	17.9425	17.8275	18.0685	18.2037	18.0349	17.7245	17.7618	17.8573
AUTS2	Autism susceptibility gene 2 protein	760	SAPPPLISTLGGRPVSPRRTTPLSAEIRERP	TPPTAALSAPPPLISTLGGRPVS(1)PR	1	19.3588	19.2685	18.8983	19.4927	19.4924	19.4102	19.5589	19.0453	19.0152	19.3587	19.4662	19.858	20.1319	19.9816	19.8044	19.6636	19.8122	19.808	19.9559	20.1689	20.0453	19.9214	NaN	NaN	NaN	NaN	NaN	NaN	NaN	NaN	NaN	NaN	NaN	NaN	NaN	NaN	NaN	NaN	NaN	NaN	NaN	NaN	NaN	NaN
AUTS2	Autism susceptibility gene 2 protein	483	SPYVRTPVVESARPNSTSSREAEPRKGEPAY	TPVVES(0.001)ARPNS(0.936)T(0.045)S(0.015)S(0.002)R	1	17.4221	17.6563	17.594	17.5733	17.6125	17.7059	17.9325	17.8984	18.0597	17.688	17.9814	19.214	19.7963	19.8356	19.6206	19.6044	19.9213	19.8586	19.8551	20.0718	19.8974	20.0856	17.5618	17.6893	17.6431	17.5921	17.5074	17.7505	17.7647	17.7837	17.6371	17.7125	17.6529	18.9787	18.9397	19.2793	19.1906	18.9966	19.3995	19.5773	19.7067	19.5639	19.6726	19.3317
AUTS2	Autism susceptibility gene 2 protein	468	GRAAGEEAKQLARVPSPYVRTPVVESARPNS	VPS(1)PYVR	1	18.5418	18.5111	18.5506	18.6815	18.6175	19.0432	18.9847	18.8702	18.8379	18.8843	18.9263	19.9671	20.3904	20.4122	20.4531	20.2816	20.3798	20.5985	20.5964	20.6067	20.542	20.698	18.8583	18.6775	18.9079	18.6986	18.7059	18.9115	19.2243	19.1428	18.7301	19.0485	19.0148	18.849	18.9246	19.0324	18.945	18.6415	18.8556	19.107	19.1224	18.6657	18.835	18.9782
LOC113230	Uncharacterized protein LOC113230	233	QAALARPAVPEPRARSPPQPLGELKRFFEAA	ARS(1)PPQPLGELK	1	NaN	NaN	NaN	NaN	NaN	NaN	NaN	NaN	NaN	NaN	NaN	NaN	NaN	NaN	NaN	NaN	NaN	NaN	NaN	NaN	NaN	NaN	NaN	NaN	NaN	NaN	NaN	NaN	NaN	NaN	NaN	NaN	NaN	19.0831	18.8071	19.1804	19.0025	18.9825	19.0613	18.8989	18.7692	18.8021	19.2376	18.9028
VGLL4	Transcription cofactor vestigial-like protein 4	267	GDTWLQIKAAKDGASSSPESASRRGQPASPS	DGAS(0.001)S(0.759)S(0.24)PESASR	1	17.288	17.4954	17.3495	17.3973	17.2284	17.3026	17.4827	17.2357	17.601	17.2752	17.4617	NaN	NaN	NaN	NaN	NaN	NaN	NaN	NaN	NaN	NaN	NaN	15.4233	15.493	14.9397	15.1614	14.8782	15.5079	15.2507	15.3627	15.3357	15.305	14.6408	NaN	NaN	NaN	NaN	NaN	NaN	NaN	NaN	NaN	NaN	NaN
VGLL4	Transcription cofactor vestigial-like protein 4	107	NKTANGDCRRDPRERSRSPIERAVAPTMSLH	ERS(1)RS(1)PIER	1;2	NaN	NaN	NaN	NaN	NaN	NaN	NaN	NaN	NaN	NaN	NaN	NaN	NaN	NaN	NaN	NaN	NaN	NaN	NaN	NaN	NaN	NaN	19.5261	19.9085	19.7589	19.7734	19.6641	19.7785	19.7296	19.783	19.6335	19.9011	19.832	NaN	NaN	NaN	NaN	NaN	NaN	NaN	NaN	NaN	NaN	NaN
VGLL4	Transcription cofactor vestigial-like protein 4	109	TANGDCRRDPRERSRSPIERAVAPTMSLHGS	ERS(1)RS(1)PIER	1;2	NaN	NaN	NaN	NaN	NaN	NaN	NaN	NaN	NaN	NaN	NaN	NaN	NaN	NaN	NaN	NaN	NaN	NaN	NaN	NaN	NaN	NaN	19.5261	19.9085	19.7589	19.7734	19.6641	19.7785	19.7296	19.783	19.6335	19.9011	19.832	NaN	NaN	NaN	NaN	NaN	NaN	NaN	NaN	NaN	NaN	NaN
VGLL4	Transcription cofactor vestigial-like protein 4	155	ALTKNSLDASRPAGLSPTLTPGERQQNRPSV	NSLDAS(0.001)RPAGLS(0.971)PT(0.022)LT(0.005)PGER	1	NaN	NaN	NaN	NaN	NaN	NaN	NaN	NaN	NaN	NaN	NaN	20.4544	20.3769	20.3408	20.3669	20.4748	22.2135	20.8157	20.7089	20.7767	20.7693	20.5861	NaN	NaN	NaN	NaN	NaN	NaN	NaN	NaN	NaN	NaN	NaN	20.3709	20.4866	20.6015	20.3593	20.2813	20.4327	20.4775	20.4343	20.4379	20.6526	20.3963
VGLL4	Transcription cofactor vestigial-like protein 4	58	VASALSSHRTGPPPISPSKRKFSMEPGDEDL	TGPPPIS(1)PSK	1	21.2626	21.4529	21.5384	21.5945	21.5467	21.4617	21.5119	21.545	21.8422	21.5037	21.6798	21.0549	21.5036	21.4636	21.6016	21.5121	21.3999	21.548	21.4783	21.6371	21.443	21.5134	21.5543	21.6779	21.6319	21.5693	21.5816	21.4813	21.4766	21.7239	21.4284	21.7158	21.6641	21.6671	21.6991	21.7184	21.6608	21.5521	21.7425	21.7172	21.9096	21.7064	21.8448	21.7279
DMD	Dystrophin	1076	KGLSPLPSPPEMMPTSPQSPRDAELIAEAKL	GLSPLPS(0.001)PPEMMPT(0.215)S(0.628)PQS(0.156)PRDAELIAEAK	1	NaN	NaN	NaN	NaN	NaN	NaN	NaN	NaN	NaN	NaN	NaN	NaN	NaN	NaN	NaN	NaN	NaN	NaN	NaN	NaN	NaN	NaN	NaN	NaN	NaN	NaN	NaN	NaN	NaN	NaN	NaN	NaN	NaN	18.2745	18.5191	18.9011	18.336	18.7302	18.4277	18.326	18.2033	18.284	18.4889	18.3587
DMD	Dystrophin	1148	VNGTTVSSPSTSLQRSDSSQPMLLRVVGSQT	S(0.596)DS(0.119)S(0.285)QPMLLR	1	17.4487	17.2862	17.2803	17.2614	17.4022	17.3889	17.2114	17.2945	17.3037	17.4392	17.5328	NaN	NaN	NaN	NaN	NaN	NaN	NaN	NaN	NaN	NaN	NaN	NaN	NaN	NaN	NaN	NaN	NaN	NaN	NaN	NaN	NaN	NaN	NaN	NaN	NaN	NaN	NaN	NaN	NaN	NaN	NaN	NaN	NaN
DMD	Dystrophin	1139	LEQPQAEAKVNGTTVSSPSTSLQRSDSSQPM	VNGTTVS(0.64)S(0.355)PS(0.004)T(0.001)SLQR	1	16.3919	16.9147	16.877	16.7788	17.031	16.6972	16.8359	17.1013	16.8291	17.0691	16.7091	18.1424	18.6348	18.6033	18.4178	18.4671	18.1865	18.5197	18.6139	18.5671	18.6788	18.3341	NaN	NaN	NaN	NaN	NaN	NaN	NaN	NaN	NaN	NaN	NaN	18.8717	19.1314	19.2365	19.0038	18.84	19.0235	19.043	18.9539	18.5825	18.9099	18.7183
DMD	Dystrophin	1140	EQPQAEAKVNGTTVSSPSTSLQRSDSSQPML	VNGTTVS(0.159)S(0.793)PS(0.035)T(0.01)S(0.003)LQR	1	NaN	NaN	NaN	NaN	NaN	NaN	NaN	NaN	NaN	NaN	NaN	19.6314	19.8979	19.8464	19.7814	19.8621	19.1606	19.6571	19.7825	19.837	19.6549	19.6558	NaN	NaN	NaN	NaN	NaN	NaN	NaN	NaN	NaN	NaN	NaN	NaN	NaN	NaN	NaN	NaN	NaN	NaN	NaN	NaN	NaN	NaN
CSRP2BP	Cysteine-rich protein 2-binding protein	415	RKKVRGPEQIKQEVESEEEKPDRMDIDSEDT	QEVES(0.999)EEEKPDRMDIDS(0.001)EDTDSNTSLQTR	1	NaN	NaN	NaN	NaN	NaN	NaN	NaN	NaN	NaN	NaN	NaN	19.5815	19.6328	19.3295	19.775	19.724	19.9369	20.0347	19.9247	20.0179	19.9216	19.6919	17.9688	17.5274	17.212	17.5334	17.8159	18.2912	17.8248	17.6801	17.7783	17.6271	17.7419	NaN	NaN	NaN	NaN	NaN	NaN	NaN	NaN	NaN	NaN	NaN
CSRP2BP	Cysteine-rich protein 2-binding protein	427	EVESEEEKPDRMDIDSEDTDSNTSLQTRARE	QEVESEEEKPDRMDIDS(0.57)EDT(0.425)DS(0.004)NTSLQTR	1	NaN	NaN	NaN	NaN	NaN	NaN	NaN	NaN	NaN	NaN	NaN	NaN	NaN	NaN	NaN	NaN	NaN	NaN	NaN	NaN	NaN	NaN	NaN	NaN	NaN	NaN	NaN	NaN	NaN	NaN	NaN	NaN	NaN	17.9836	18.3269	18.589	18.3756	17.7295	17.7625	17.9085	17.8978	17.2766	18.0279	18.0928
AMBRA1	Activating molecule in BECN1-regulated autophagy protein 1	1108	RGLLPEAGQLAERGLSPRTASWDQPGTPGRE	GLLPEAGQLAERGLS(1)PR	1	NaN	NaN	NaN	NaN	NaN	NaN	NaN	NaN	NaN	NaN	NaN	17.7717	17.7687	17.7454	17.9176	17.989	17.1714	17.9762	18.0225	18.1973	17.8923	18.0406	17.6177	17.8251	17.6827	17.3502	17.5811	17.5651	17.5778	17.7296	17.5224	17.6746	17.6311	18.5293	18.6194	18.409	18.4444	18.6685	18.7015	18.1201	18.7601	18.605	18.2015	18.6541
AMBRA1	Activating molecule in BECN1-regulated autophagy protein 1	549	GQTPSSSRLELSSSASPQEERTVGVAFNQET	TEGQTPSSSRLELS(0.001)S(0.041)S(0.202)AS(0.756)PQEER	1	NaN	NaN	NaN	NaN	NaN	NaN	NaN	NaN	NaN	NaN	NaN	NaN	NaN	NaN	NaN	NaN	NaN	NaN	NaN	NaN	NaN	NaN	18.391	18.4351	17.9209	18.0712	17.9157	18.5516	18.2578	18.4969	18.1017	18.2547	17.8228	NaN	NaN	NaN	NaN	NaN	NaN	NaN	NaN	NaN	NaN	NaN
ATAD5	ATPase family AAA domain-containing protein 5	817	KAQKAADPVPSFDESSQDTSEKSQDCDVQCK	AADPVPS(0.002)FDES(0.02)S(0.934)QDT(0.038)S(0.005)EK	1	NaN	NaN	NaN	NaN	NaN	NaN	NaN	NaN	NaN	NaN	NaN	NaN	NaN	NaN	NaN	NaN	NaN	NaN	NaN	NaN	NaN	NaN	NaN	NaN	NaN	NaN	NaN	NaN	NaN	NaN	NaN	NaN	NaN	18.5423	18.5743	18.7339	18.195	18.5196	18.6395	18.5718	18.6068	18.2841	18.4818	18.3438
ATAD5	ATPase family AAA domain-containing protein 5	217	FKKLRKRKCRDVVDLSESLPLAEELNLLKKD	CRDVVDLS(0.542)ES(0.458)LPLAEELNLLK	1	NaN	NaN	NaN	NaN	NaN	NaN	NaN	NaN	NaN	NaN	NaN	NaN	NaN	NaN	NaN	NaN	NaN	NaN	NaN	NaN	NaN	NaN	NaN	NaN	NaN	NaN	NaN	NaN	NaN	NaN	NaN	NaN	NaN	15.1039	14.917	15.5865	15.1869	15.0482	15.23	15.2788	15.4631	15.1898	15.5871	15.4989
ATAD5	ATPase family AAA domain-containing protein 5	219	KLRKRKCRDVVDLSESLPLAEELNLLKKDGK	CRDVVDLS(0.004)ES(0.996)LPLAEELNLLK	1	15.9646	15.9853	15.7787	15.7144	15.7219	15.6218	16.083	15.8138	16.1929	16.029	15.7938	NaN	NaN	NaN	NaN	NaN	NaN	NaN	NaN	NaN	NaN	NaN	15.5564	15.3474	15.6596	15.199	15.0279	15.9325	15.9693	15.2239	15.329	15.3972	15.5474	NaN	NaN	NaN	NaN	NaN	NaN	NaN	NaN	NaN	NaN	NaN
ATAD5	ATPase family AAA domain-containing protein 5	651	KHSLYTAELITVPFDSESPIRMKFTRISTPK	HSLYTAELITVPFDS(0.5)ES(0.5)PIRMK	1	NaN	NaN	NaN	NaN	NaN	NaN	NaN	NaN	NaN	NaN	NaN	NaN	NaN	NaN	NaN	NaN	NaN	NaN	NaN	NaN	NaN	NaN	NaN	NaN	NaN	NaN	NaN	NaN	NaN	NaN	NaN	NaN	NaN	18.6114	18.6635	18.5704	18.4168	18.2844	18.5443	18.4811	17.8902	18.3662	18.365	18.0316
ATAD5	ATPase family AAA domain-containing protein 5	653	SLYTAELITVPFDSESPIRMKFTRISTPKKS	HSLYTAELIT(0.025)VPFDS(0.16)ES(0.815)PIRMK	1	16.175	16.9732	16.576	16.7074	16.5786	16.4979	16.7029	16.0073	16.9887	16.6011	16.3382	NaN	NaN	NaN	NaN	NaN	NaN	NaN	NaN	NaN	NaN	NaN	15.7563	15.6709	15.4969	15.3571	15.2374	15.8742	15.4815	15.3966	15.4723	15.3754	15.0931	18.6114	18.6635	18.5704	18.4168	18.2844	18.5443	18.4811	17.8902	18.3662	18.365	18.0316
ATAD5	ATPase family AAA domain-containing protein 5	86	PTNEKTQLGKECKIKSPESVPVDSNKDCTTP	IKS(0.993)PES(0.007)VPVDSNK	1	NaN	NaN	NaN	NaN	NaN	NaN	NaN	NaN	NaN	NaN	NaN	19.5094	19.8818	19.707	19.3466	19.5288	19.6604	19.6497	19.3799	19.5047	19.5689	19.0893	15.8438	15.8043	15.8703	15.3964	15.2852	16.0692	15.7982	14.7148	15.751	15.5198	14.6796	NaN	NaN	NaN	NaN	NaN	NaN	NaN	NaN	NaN	NaN	NaN
ATAD5	ATPase family AAA domain-containing protein 5	89	EKTQLGKECKIKSPESVPVDSNKDCTTPLEM	IKS(0.182)PES(0.813)VPVDS(0.005)NK	1	18.0622	18.2079	18.0378	18.0531	18.0682	18.8757	18.3157	17.8285	18.2379	18.3715	17.8654	NaN	NaN	NaN	NaN	NaN	NaN	NaN	NaN	NaN	NaN	NaN	NaN	NaN	NaN	NaN	NaN	NaN	NaN	NaN	NaN	NaN	NaN	16.4952	16.4373	16.2322	15.8497	16.1147	16.5436	16.3958	15.6185	15.6527	15.9725	15.7385
ATAD5	ATPase family AAA domain-containing protein 5	756	KKLSETEDSVIIIDSSPTALKHPEKNQKKLQ	KLSETEDSVIIIDS(0.064)S(0.936)PTALK	1	NaN	NaN	NaN	NaN	NaN	NaN	NaN	NaN	NaN	NaN	NaN	NaN	NaN	NaN	NaN	NaN	NaN	NaN	NaN	NaN	NaN	NaN	NaN	NaN	NaN	NaN	NaN	NaN	NaN	NaN	NaN	NaN	NaN	18.7818	19.0006	18.9279	18.7411	18.6654	18.8778	19.0424	18.4918	18.552	19.1596	18.4627
ATAD5	ATPase family AAA domain-containing protein 5	70	APPKPSNILDYFRKTSPTNEKTQLGKECKIK	T(0.001)S(0.999)PTNEK	1	20.3334	20.4222	20.4342	20.4058	20.3356	18.0279	20.3075	20.239	20.4	20.316	20.2585	22.1555	22.3673	22.398	22.3687	22.3892	20.0017	22.4276	22.1543	22.4446	22.3041	22.2754	15.4905	15.7242	15.8298	15.471	15.3092	15.546	16.539	15.3036	15.0712	16.7553	15.6454	21.2337	21.2594	21.232	21.0096	20.914	21.2275	20.6112	20.985	21.0303	20.078	20.9563
ATAD5	ATPase family AAA domain-containing protein 5	356	RIFLKQKQFEMENSLSDPENEQTVQKRKSNV	QFEMENSLS(1)DPENEQTVQK	1	16.6887	16.387	16.7456	16.7328	16.9191	16.4602	16.7387	17.1595	17.3722	17.1365	17.1698	17.2155	17.5797	16.9202	17.4593	17.6343	17.1674	17.609	17.4377	17.6671	17.9478	17.3634	NaN	NaN	NaN	NaN	NaN	NaN	NaN	NaN	NaN	NaN	NaN	18.1176	17.6531	18.1722	17.9186	17.988	18.0138	18.2681	18.1901	17.8929	17.9787	18.2214
ATAD5	ATPase family AAA domain-containing protein 5	306	VPSETVDEIVKSGYISESENSEISQQVRFKT	SGYIS(0.999)ES(0.001)ENSEISQQVR	1	19.4236	19.5528	19.5998	19.6586	19.59	19.1239	19.618	19.6178	19.6424	19.7568	19.6854	18.2162	18.0377	18.342	18.3155	18.3051	18.0571	18.5432	18.4164	18.3956	18.3838	18.4844	17.9821	17.9956	17.9998	17.9415	18.055	18.1195	17.991	18.3629	17.8808	18.3181	17.9678	18.4894	18.5426	18.6168	18.2947	18.3296	18.55	18.6207	18.7575	18.4886	18.4545	18.6542
ATAD5	ATPase family AAA domain-containing protein 5	308	SETVDEIVKSGYISESENSEISQQVRFKTVT	SGYIS(0.313)ES(0.686)ENSEISQQVR	1	NaN	NaN	NaN	NaN	NaN	NaN	NaN	NaN	NaN	NaN	NaN	NaN	NaN	NaN	NaN	NaN	NaN	NaN	NaN	NaN	NaN	NaN	17.67	17.7581	17.8788	17.6586	17.7253	17.8242	17.8688	17.8487	17.5791	17.9348	17.7121	NaN	NaN	NaN	NaN	NaN	NaN	NaN	NaN	NaN	NaN	NaN
ATAD5	ATPase family AAA domain-containing protein 5	1222	SPKKVVTSPRKVPPPSPK_____________	VPPPS(1)PK	1	18.9935	18.9809	18.94	18.9692	19.1379	18.8495	19.2073	19.2846	19.5317	19.3022	19.3262	NaN	NaN	NaN	NaN	NaN	NaN	NaN	NaN	NaN	NaN	NaN	20.2805	20.1062	20.1719	20.0351	20.0969	20.3927	20.2303	20.5046	20.2414	20.3452	20.2511	17.4128	17.7068	17.835	17.6648	17.5558	17.5652	17.149	17.4577	17.3164	16.9433	17.5098
ATAD5	ATPase family AAA domain-containing protein 5	1214	GKSPKKISSPKKVVTSPRKVPPPSPK_____	VVT(0.109)S(0.891)PRK	1	NaN	NaN	NaN	NaN	NaN	NaN	NaN	NaN	NaN	NaN	NaN	NaN	NaN	NaN	NaN	NaN	NaN	NaN	NaN	NaN	NaN	NaN	17.8483	18.0396	17.9273	17.8276	17.7551	18.0614	17.3946	17.8236	17.9738	16.9573	17.8093	NaN	NaN	NaN	NaN	NaN	NaN	NaN	NaN	NaN	NaN	NaN
ATAD5	ATPase family AAA domain-containing protein 5	44	KDDDTSTCKTITKYLSPLGKTRDRVFAPPKP	YLS(1)PLGK	1	19.7004	20.1065	19.7761	19.6795	19.7492	19.8244	19.759	19.367	19.805	19.6386	19.4992	20.83	21.1974	20.8708	20.8512	20.8356	21.0209	20.8055	20.5321	20.83	20.7207	20.5007	19.318	19.4748	19.41	19.1387	19.0694	19.2176	19.2288	18.9513	19.0623	19.224	18.8559	19.0856	19.2938	19.2011	18.9913	18.8843	19.0127	19.218	18.7046	18.8985	19.1812	18.627
USP36	Ubiquitin carboxyl-terminal hydrolase;Ubiquitin carboxyl-terminal hydrolase 36	713	TLWRATGNDLRPPPPSPSSDLTHPMKTSHPV	ATGNDLRPPPPS(0.952)PS(0.032)S(0.016)DLTHPMK	1	18.7766	18.5331	18.6199	18.5471	18.5662	19.1561	18.6184	18.4976	18.6075	18.5312	18.4717	20.8822	20.5697	20.5488	20.5303	20.7458	21.0896	20.4493	20.1863	20.6823	20.3398	20.03	18.0792	18.2965	17.8851	17.774	18.0566	18.2052	17.7239	17.4887	17.5141	17.7199	17.6003	20.1099	19.9651	19.9197	19.8804	20.101	20.2326	19.874	19.8613	19.7326	19.8275	19.5595
USP36	Ubiquitin carboxyl-terminal hydrolase;Ubiquitin carboxyl-terminal hydrolase 36	742	PVVASTWPVHRARAVSPAPQSSSRLQPPFSP	AVS(1)PAPQSSSR	1	23.0961	23.0871	23.1118	23.3237	23.1351	23.0919	23.3572	23.4043	23.3918	23.3054	23.2509	22.6702	22.9166	22.7858	22.9865	22.9164	23.1086	23.2727	23.0172	23.3296	23.3251	23.3169	22.8061	22.9459	22.7349	22.6021	22.6377	22.9524	23.0315	23.2331	22.6837	23.1582	23.0588	22.1125	22.2765	22.2656	22.293	22.1933	22.4017	22.5569	22.8345	22.3771	22.5457	22.5277
USP36	Ubiquitin carboxyl-terminal hydrolase;Ubiquitin carboxyl-terminal hydrolase 36	582	QRQGSWDSRDVVLSTSPKLLATATANGHGLK	QGSWDSRDVVLST(0.001)S(0.999)PK	1	15.2977	15.9495	15.3194	15.5279	15.1122	15.7465	15.8673	15.4311	15.6153	15.6556	15.3427	20.2129	20.8144	20.4041	20.6282	20.4054	20.7064	20.9712	20.4273	20.7028	20.5642	20.4751	NaN	NaN	NaN	NaN	NaN	NaN	NaN	NaN	NaN	NaN	NaN	21.7911	21.8503	21.489	21.505	21.0792	22.0649	22.2366	21.6763	21.4351	21.7288	21.6096
USP36	Ubiquitin carboxyl-terminal hydrolase;Ubiquitin carboxyl-terminal hydrolase 36	952	SCSPMGDGDPEAMEESPRKKKKKKR______	HSCSPMGDGDPEAMEES(1)PRKK	1;2	21.243	22.264	22.3413	22.2064	22.2868	21.7403	21.5584	21.3973	22.0321	21.5384	21.7393	22.1421	23.6217	23.7024	23.5032	23.5361	22.9131	22.7289	22.2984	23.2647	22.5196	23.0414	20.6608	20.9932	21.1539	21.1033	20.9882	20.7364	20.7339	20.9661	20.6499	20.7094	20.7133	23.1595	22.6348	23.6664	23.6571	23.1247	23.0153	23.275	23.4459	23.0497	23.2409	23.2395
USP36	Ubiquitin carboxyl-terminal hydrolase;Ubiquitin carboxyl-terminal hydrolase 36	613	GNDESAGLDRRGSSSSSPEHSASSDSTKAPQ	GNDESAGLDRRGS(0.83)S(0.196)S(0.694)S(0.693)S(0.587)PEHSASSDSTK	1;3	NaN	NaN	NaN	NaN	NaN	NaN	NaN	NaN	NaN	NaN	NaN	NaN	NaN	NaN	NaN	NaN	NaN	NaN	NaN	NaN	NaN	NaN	NaN	NaN	NaN	NaN	NaN	NaN	NaN	NaN	NaN	NaN	NaN	20.8275	21.1118	19.9378	20.5394	20.9797	21.1113	19.9567	20.7292	19.7865	19.6637	19.9706
USP36	Ubiquitin carboxyl-terminal hydrolase;Ubiquitin carboxyl-terminal hydrolase 36	614	NDESAGLDRRGSSSSSPEHSASSDSTKAPQT	GSSSS(0.003)S(0.996)PEHS(0.001)ASSDSTK	1;3	21.5336	21.7312	21.9053	21.2771	21.7302	21.7628	21.0041	21.0656	21.2505	20.8501	20.9635	23.0644	23.274	23.4495	22.7214	23.2597	23.3456	22.3789	22.5339	22.6742	22.2029	22.2672	21.4284	21.633	20.6462	21.18	21.5249	21.6817	20.4922	21.3042	20.2248	20.3639	20.615	22.9969	23.2634	22.1969	22.6884	23.0663	23.2624	22.0517	22.9257	21.9046	21.9	22.0131
USP36	Ubiquitin carboxyl-terminal hydrolase;Ubiquitin carboxyl-terminal hydrolase 36	692	PASTMSPPPAKKLALSAKKASTLWRATGNDL	LALS(1)AKK	1	17.9081	19.1969	18.2006	18.4739	17.9671	17.9456	18.2726	17.7043	18.2369	18.2411	17.7134	18.4607	20.0163	18.8015	19.1045	18.4173	18.5835	19.1802	18.0829	18.9718	18.8378	18.2848	NaN	NaN	NaN	NaN	NaN	NaN	NaN	NaN	NaN	NaN	NaN	18.0423	18.495	18.4214	18.2872	17.6623	18.0141	18.5526	17.8838	18.0526	18.7123	17.8341
USP36	Ubiquitin carboxyl-terminal hydrolase;Ubiquitin carboxyl-terminal hydrolase 36	546	DPGKKVKKPAPPQHFSPRTAQGLPGTSNSNS	PAPPQHFS(1)PR	1	19.6377	20.5011	19.9516	20.1115	19.8107	20.4986	20.1567	19.5504	20.0774	20.0433	19.6551	19.5029	20.6576	20.0351	20.1308	19.7175	20.2874	20.0754	19.3986	19.9183	19.8792	19.5864	19.45	19.7547	19.3443	19.4688	18.9924	19.6891	19.6518	19.1289	19.2776	19.5971	19.1944	19.7629	20.2355	19.6814	19.6882	19.3218	20.1411	19.9912	19.4471	19.5751	19.8676	19.3268
USP36	Ubiquitin carboxyl-terminal hydrolase;Ubiquitin carboxyl-terminal hydrolase 36	667	KTPPSGADSKTVKLKSPVLSNTTTEPASTMS	LKS(1)PVLSNTTTEPAS(0.037)T(0.032)MS(0.931)PPPAK	1;2	NaN	NaN	NaN	NaN	NaN	NaN	NaN	NaN	NaN	NaN	NaN	16.6403	16.216	16.1869	16.4171	16.5471	16.5509	17.1775	16.913	17.2528	17.0453	17.3724	NaN	NaN	NaN	NaN	NaN	NaN	NaN	NaN	NaN	NaN	NaN	15.2808	15.3288	15.2853	15.5673	15.1633	15.9023	16.1493	16.3081	16.1078	16.202	16.027
USP36	Ubiquitin carboxyl-terminal hydrolase;Ubiquitin carboxyl-terminal hydrolase 36	682	SPVLSNTTTEPASTMSPPPAKKLALSAKKAS	SPVLSNTTTEPASTMS(1)PPPAK	1;2	18.9275	19.3782	19.4664	19.2101	19.4425	19.721	19.0337	18.9292	19.1483	18.8631	19.0297	19.693	20.0427	20.102	19.8895	20.0465	19.5429	19.8283	19.3833	19.4256	19.4544	19.5691	17.7792	18.059	18.3184	18.2095	17.9909	17.8386	17.9219	17.8663	17.8071	18.0148	17.9806	19.7555	20.0576	20.2816	20.0062	20.1193	19.7943	19.9066	19.7351	19.6192	19.74	19.7868
USP36	Ubiquitin carboxyl-terminal hydrolase;Ubiquitin carboxyl-terminal hydrolase 36	513	LKSQNGCIPPKLPSGSPSPKLSQTPTHMPTI	LPS(0.001)GS(0.964)PS(0.035)PK	1	18.4895	19.226	18.8076	18.9497	18.5434	17.9702	18.9992	18.4343	18.8919	18.744	18.6088	20.7741	21.2228	20.897	21.0547	20.6913	19.679	21.1652	20.8614	20.8967	20.9437	20.7591	NaN	NaN	NaN	NaN	NaN	NaN	NaN	NaN	NaN	NaN	NaN	NaN	NaN	NaN	NaN	NaN	NaN	NaN	NaN	NaN	NaN	NaN
USP36	Ubiquitin carboxyl-terminal hydrolase;Ubiquitin carboxyl-terminal hydrolase 36	515	SQNGCIPPKLPSGSPSPKLSQTPTHMPTILD	LPSGS(0.019)PS(0.981)PK	1	NaN	NaN	NaN	NaN	NaN	NaN	NaN	NaN	NaN	NaN	NaN	NaN	NaN	NaN	NaN	NaN	NaN	NaN	NaN	NaN	NaN	NaN	NaN	NaN	NaN	NaN	NaN	NaN	NaN	NaN	NaN	NaN	NaN	19.3231	19.6413	19.5259	19.4209	19.2835	19.3837	19.4257	19.5629	19.362	19.2037	19.4195
USP36	Ubiquitin carboxyl-terminal hydrolase;Ubiquitin carboxyl-terminal hydrolase 36	463	VIPDHSKKNIGNGIISSPLTGKRQDSGTMKK	NIGNGIIS(0.778)S(0.222)PLTGK	1	NaN	NaN	NaN	NaN	NaN	NaN	NaN	NaN	NaN	NaN	NaN	NaN	NaN	NaN	NaN	NaN	NaN	NaN	NaN	NaN	NaN	NaN	NaN	NaN	NaN	NaN	NaN	NaN	NaN	NaN	NaN	NaN	NaN	20.476	20.753	20.2838	20.2489	19.7814	20.5915	20.3197	19.6195	19.9103	20.0247	19.8185
USP36	Ubiquitin carboxyl-terminal hydrolase;Ubiquitin carboxyl-terminal hydrolase 36	464	IPDHSKKNIGNGIISSPLTGKRQDSGTMKKP	NIGNGIIS(0.071)S(0.926)PLT(0.003)GK	1	20.0695	21.0203	20.4848	20.31	20.2961	20.3072	20.3275	19.6326	20.2286	20.0163	19.8299	NaN	NaN	NaN	NaN	NaN	NaN	NaN	NaN	NaN	NaN	NaN	17.9489	18.3331	17.8382	17.7381	17.4919	18.2141	18.1041	17.3288	17.7801	18.0344	17.511	NaN	NaN	NaN	NaN	NaN	NaN	NaN	NaN	NaN	NaN	NaN
USP36	Ubiquitin carboxyl-terminal hydrolase;Ubiquitin carboxyl-terminal hydrolase 36	871	AASALQEGQTQRQPGSPMYRREGQAQLPAVR	QPGS(1)PMYRR	1	NaN	NaN	NaN	NaN	NaN	NaN	NaN	NaN	NaN	NaN	NaN	18.5297	18.8679	19.0042	19.0593	18.9322	20.9415	19.1066	19.2406	19.1653	18.8978	19.1397	18.2535	18.3451	18.3068	18.1535	18.022	18.3886	18.5363	18.4099	18.2661	18.5535	18.4154	19.6179	19.641	19.8128	19.6757	19.507	19.6709	19.9295	19.819	19.5113	20.1836	19.7187
KIAA1468	LisH domain and HEAT repeat-containing protein KIAA1468	180	EPSTASGGGQLNRAGSISTLDSLDFARYSDD	AGS(1)IS(0.597)T(0.404)LDS(1)LDFARYS(1)DDGNRETDEK	1;2;3;4;5	NaN	NaN	NaN	NaN	NaN	NaN	NaN	NaN	NaN	NaN	NaN	20.7844	20.5568	20.5173	20.4662	20.6047	21.0887	20.8746	20.7626	20.8927	20.8706	20.4109	NaN	NaN	NaN	NaN	NaN	NaN	NaN	NaN	NaN	NaN	NaN	19.9898	19.7174	19.6617	19.7397	19.8691	19.6189	19.8762	19.5645	19.9388	19.8993	19.7908
KIAA1468	LisH domain and HEAT repeat-containing protein KIAA1468	182	STASGGGQLNRAGSISTLDSLDFARYSDDGN	AGS(0.935)IS(0.991)T(0.998)LDS(0.076)LDFARYS(1)DDGNRETDEK	1;2;3;4;5	NaN	NaN	NaN	NaN	NaN	NaN	NaN	NaN	NaN	NaN	NaN	NaN	NaN	NaN	NaN	NaN	NaN	NaN	NaN	NaN	NaN	NaN	NaN	NaN	NaN	NaN	NaN	NaN	NaN	NaN	NaN	NaN	NaN	NaN	NaN	NaN	NaN	NaN	NaN	NaN	NaN	NaN	NaN	NaN
KIAA1468	LisH domain and HEAT repeat-containing protein KIAA1468	193	AGSISTLDSLDFARYSDDGNRETDEKVAVLE	AGSISTLDSLDFARYS(1)DDGNRETDEK	1;2;3;4;5	NaN	NaN	NaN	NaN	NaN	NaN	NaN	NaN	NaN	NaN	NaN	20.4006	21.0583	21.4583	21.0309	21.1453	20.1684	20.2335	19.6704	20.3182	20.071	19.9857	NaN	NaN	NaN	NaN	NaN	NaN	NaN	NaN	NaN	NaN	NaN	19.6014	20.5861	20.9431	20.5942	20.5515	19.722	19.5942	19.2707	19.6545	19.6297	19.18
KIAA1468	LisH domain and HEAT repeat-containing protein KIAA1468	453	LSISDEADSTIPKENSPNSFPRREREGMPPS	ENS(1)PNSFPRR	1	NaN	NaN	NaN	NaN	NaN	NaN	NaN	NaN	NaN	NaN	NaN	20.6447	20.6886	20.3725	20.574	20.7253	21.0158	21.1505	20.7883	21.0284	20.9271	20.7423	21.0385	20.4282	20.3967	20.168	20.2621	21.1175	21.1816	20.8892	20.7214	20.9634	20.6951	20.8404	20.4672	20.3346	20.4135	20.3152	21.0968	21.0311	20.7435	20.6358	20.824	20.6602
KIAA1468	LisH domain and HEAT repeat-containing protein KIAA1468	170	AAGVGGAGGREPSTASGGGQLNRAGSISTLD	QS(0.001)GT(0.002)PPGMGAPGVPGAAGVGGAGGREPS(0.148)T(0.263)AS(0.587)GGGQLNR	1	NaN	NaN	NaN	NaN	NaN	NaN	NaN	NaN	NaN	NaN	NaN	NaN	NaN	NaN	NaN	NaN	NaN	NaN	NaN	NaN	NaN	NaN	14.6876	14.5719	14.8418	14.6698	14.4124	14.8543	15.216	15.1021	14.9613	15.1258	15.0899	NaN	NaN	NaN	NaN	NaN	NaN	NaN	NaN	NaN	NaN	NaN
KIAA1468	LisH domain and HEAT repeat-containing protein KIAA1468	243	AAEHEVPLQERKNYKSSPEIQEPIKPLEKRA	S(0.5)S(0.5)PEIQEPIKPLEK	1	18.9217	18.6026	18.5741	18.8583	19.0644	20.363	19.2969	18.8992	19.1657	19.3474	18.8807	20.9092	20.4554	20.1298	20.5026	20.653	21.9714	21.1104	20.7762	20.8801	20.962	20.3978	NaN	NaN	NaN	NaN	NaN	NaN	NaN	NaN	NaN	NaN	NaN	19.7787	19.3374	19.3577	19.0727	18.9709	19.8201	19.4579	19.4086	19.3843	18.8158	19.1481
KIAA1468	LisH domain and HEAT repeat-containing protein KIAA1468	244	AEHEVPLQERKNYKSSPEIQEPIKPLEKRAL	S(0.129)S(0.871)PEIQEPIK	1	20.2545	19.9528	19.7003	19.8737	19.9763	20.5469	20.4478	20.0025	20.2248	20.407	20.0288	20.9092	20.4554	20.1298	20.5026	20.653	21.9714	21.1104	20.7762	20.8801	20.962	20.3978	18.9068	18.5001	18.3469	18.256	18.4019	19.1421	18.6419	18.6098	18.7159	17.8518	18.3508	21.0609	20.7185	20.4956	20.5446	20.5019	21.2386	21.4068	20.7383	20.8749	21.6825	20.6962
BCL2L12	Bcl-2-like protein 12	189	DSSRPSRACPGPPPPSPEPLARLALAMELSR	ACPGPPPPS(1)PEPLAR	1	17.5356	18.0229	17.8838	17.633	17.6421	18.2258	17.3862	17.5894	17.9891	17.8456	17.5395	18.6072	19.0587	19.0946	18.733	18.6111	18.643	18.8238	18.489	18.8744	18.9289	18.7625	18.4349	18.5617	18.7425	18.5553	18.4916	18.4495	18.5066	18.5454	18.604	18.5808	18.4061	18.5693	19.0258	19.0367	18.7867	19.0197	19.0174	18.9207	18.7244	18.4875	19.4577	18.7895
BCL2L12	Bcl-2-like protein 12	158	KLASDPALRSKLVRLSSDSFARLVELFCSRD	LVRLS(0.975)S(0.025)DSFAR	1	17.1531	17.1826	17.1769	17.1767	17.4687	18.0582	17.2676	17.3962	17.356	17.3204	17.0908	18.1269	18.2715	18.4017	18.1833	18.3502	18.339	18.352	18.3386	18.6127	18.2682	18.2818	17.9216	18.0393	18.0061	17.821	17.6861	17.8796	17.9386	17.9012	17.796	17.8914	17.8535	18.4855	18.9268	18.9838	18.801	18.811	18.6223	18.8514	18.7725	18.7768	18.7791	18.6376
BCL2L12	Bcl-2-like protein 12	159	LASDPALRSKLVRLSSDSFARLVELFCSRDD	LVRLS(0.285)S(0.678)DS(0.037)FAR	1	NaN	NaN	NaN	NaN	NaN	NaN	NaN	NaN	NaN	NaN	NaN	17.7742	17.9073	17.6239	17.5719	18.0533	17.8117	18.0702	18.0206	18.1466	17.7427	17.759	NaN	NaN	NaN	NaN	NaN	NaN	NaN	NaN	NaN	NaN	NaN	NaN	NaN	NaN	NaN	NaN	NaN	NaN	NaN	NaN	NaN	NaN
BCL2L12	Bcl-2-like protein 12	111	QRLEQLVQEQLKSPPSPELQGPPSTEKEAIL	SPPS(1)PELQGPPSTEK	1	18.0256	18.8471	18.7661	18.6894	18.6286	17.9956	18.1494	18.2316	18.0689	17.9464	18.1353	18.9082	19.7718	19.5976	19.4011	19.556	18.9903	19.0683	19.0551	19.0252	18.8091	19.021	18.0916	18.6434	18.7094	18.3116	18.3456	18.0238	18.2589	17.9504	17.8431	17.9595	17.8021	NaN	NaN	NaN	NaN	NaN	NaN	NaN	NaN	NaN	NaN	NaN
PMF1-BGLAP		127	QAQQQAWQVRSPAVQSPAKVQPLCPSRRAAR	SPAVQS(1)PAK	1	17.1341	17.5647	17.3811	17.166	17.203	17.1151	17.371	17.1539	17.1688	17.3077	17.2239	19.5552	20.0501	19.9218	19.7227	19.867	19.6625	19.676	19.6134	19.6924	19.82	19.6102	17.5093	17.8056	17.7735	17.5836	17.4948	17.5868	17.5031	17.4895	17.3231	17.6183	17.3469	19.2364	19.5912	19.6599	19.4307	19.3515	19.4269	19.4655	19.5078	19.2922	19.4469	19.4031
CECR2	Cat eye syndrome critical region protein 2	239	QGKELPPELSHLDPNSPMREEKKTKDLFELD	ELPPELSHLDPNS(1)PMREEK	1	NaN	NaN	NaN	NaN	NaN	NaN	NaN	NaN	NaN	NaN	NaN	21.2445	21.3105	21.4221	21.4794	21.4041	21.1224	21.4694	21.3745	21.4887	21.4254	21.5898	17.1752	17.2826	17.1713	16.7637	17.0795	17.2154	17.3339	17.1285	16.9956	17.1183	17.0925	20.3567	20.2196	20.2846	20.2082	20.2679	20.3967	20.2661	20.211	20.1845	20.2134	20.3194
CECR2	Cat eye syndrome critical region protein 2	1122	NDGQNPGPEEEKLDESMERPESPKEFLDLDN	VPNDGQNPGPEEEKLDES(1)MERPES(1)PK	1;2	NaN	NaN	NaN	NaN	NaN	NaN	NaN	NaN	NaN	NaN	NaN	NaN	NaN	NaN	NaN	NaN	NaN	NaN	NaN	NaN	NaN	NaN	18.2314	17.9085	18.0311	18.2517	18.0755	18.243	18.5592	18.24	18.0641	18.7759	18.1804	NaN	NaN	NaN	NaN	NaN	NaN	NaN	NaN	NaN	NaN	NaN
CECR2	Cat eye syndrome critical region protein 2	1128	GPEEEKLDESMERPESPKEFLDLDNHNAATK	VPNDGQNPGPEEEKLDES(1)MERPES(1)PK	1;2	21.7425	21.5917	21.7565	21.8145	21.8113	20.8135	22.0403	21.9397	21.9685	21.9851	22.0506	22.2504	22.0691	22.1696	22.2892	22.3648	21.0135	22.5262	22.4117	22.5099	22.4379	22.5796	20.9936	20.8611	21.1326	20.9342	20.8263	21.0345	20.8526	21.1577	20.9694	20.2856	21.0849	22.0396	21.7875	22.1301	22.0425	21.8883	22.0873	21.8793	22.2137	21.9457	21.2019	22.0667
CECR2	Cat eye syndrome critical region protein 2	830	PHPTPPLQTDCTRQSSPQERETVGPELKSSS	QS(0.116)S(0.884)PQERETVGPELK	1	19.7644	19.661	19.6255	19.6237	19.7636	20.0891	19.9576	20.0375	20.1338	20.2294	20.0854	NaN	NaN	NaN	NaN	NaN	NaN	NaN	NaN	NaN	NaN	NaN	19.3272	19.2564	19.2533	19.128	19.249	19.557	19.525	19.6649	19.3445	19.6542	19.6239	21.9655	21.5475	21.7745	21.6007	21.5015	22.0252	22.0378	21.6971	21.6179	21.9084	21.7514
GRIPAP1	GRIP1-associated protein 1	647	REKESSAVPARSLSSSPQAQPPRPAELSDEE	SLSS(0.005)S(0.995)PQAQPPRPAELSDEEVAELFQR	1;2;3	20.78	20.9556	20.9272	20.8486	21.0292	21.1224	20.9178	20.6402	20.9472	20.7203	20.7723	20.5319	20.7962	20.5944	21.0552	20.9981	20.9151	20.6113	20.5437	20.6677	20.4498	20.8033	20.6351	20.8556	20.7687	20.7136	20.6195	20.7907	20.9326	20.6202	20.4629	20.712	20.5577	19.5297	19.8721	19.6648	19.7974	19.5675	19.6704	19.6994	19.7908	19.4525	20.14	19.602
GRIPAP1	GRIP1-associated protein 1	196	EELAKLSEKLKKKQESFCRLQTEKETLFNDS	KQES(1)FCR	1	18.5754	18.806	18.6422	18.6544	18.7824	18.7845	18.7809	18.5917	18.7791	18.7055	18.7294	NaN	NaN	NaN	NaN	NaN	NaN	NaN	NaN	NaN	NaN	NaN	NaN	NaN	NaN	NaN	NaN	NaN	NaN	NaN	NaN	NaN	NaN	19.1819	18.8984	19.067	19.1176	19.1431	19.0878	19.0925	18.8719	18.8198	19.9319	18.669
GRIPAP1	GRIP1-associated protein 1	620	LSEMNSPSRTQTGDSSSISSFSYREILREKE	TQTGDS(0.008)S(0.689)S(0.303)ISSFSYR	1	NaN	NaN	NaN	NaN	NaN	NaN	NaN	NaN	NaN	NaN	NaN	NaN	NaN	NaN	NaN	NaN	NaN	NaN	NaN	NaN	NaN	NaN	NaN	NaN	NaN	NaN	NaN	NaN	NaN	NaN	NaN	NaN	NaN	NaN	NaN	NaN	NaN	NaN	NaN	NaN	NaN	NaN	NaN	NaN
GRIPAP1	GRIP1-associated protein 1	621	SEMNSPSRTQTGDSSSISSFSYREILREKES	TQTGDS(0.002)S(0.366)S(0.632)ISSFSYR	1	NaN	NaN	NaN	NaN	NaN	NaN	NaN	NaN	NaN	NaN	NaN	NaN	NaN	NaN	NaN	NaN	NaN	NaN	NaN	NaN	NaN	NaN	18.7953	18.6701	18.7854	18.5753	18.3306	18.9132	19.0756	18.892	18.4162	18.875	18.7542	NaN	NaN	NaN	NaN	NaN	NaN	NaN	NaN	NaN	NaN	NaN
ZNF195	Zinc finger protein 195	398	EKLSKCETWYKGFNHSPNPSKHQRNEIGGKP	GFNHS(1)PNPSK	1	17.2709	18.1098	17.5842	17.4445	17.1625	17.5748	17.3022	16.8224	17.1324	17.1506	16.8776	18.1246	19.118	18.4059	18.5494	18.3349	18.7223	18.2335	17.5702	17.9819	17.8954	17.5999	17.1557	17.878	17.2326	17.19	17.027	17.4081	17.1721	16.6604	16.7811	17.0208	16.5682	19.6512	20.4522	19.7887	19.6274	19.5252	19.8542	19.5555	19.0396	19.2185	19.3129	18.9705
SLC1A3	Amino acid transporter;Excitatory amino acid transporter 1	400	LSRHELKNRDVEMGNSVIEENEMKKPYQLIA	NRDVEMGNS(1)VIEENEMK	1	17.6894	17.8913	17.6474	17.6757	17.8397	17.8076	18.2473	18.5447	18.409	18.5546	17.9808	19.2335	18.7983	18.975	18.8523	18.7946	18.7783	19.3883	19.6002	19.2282	19.5236	19.3941	18.3024	18.3259	18.6447	18.4934	18.1395	18.4985	18.5155	18.8531	18.6384	18.2005	18.7392	20.2285	20.2365	20.1375	20.2367	20.0503	20.3677	20.2101	20.4578	20.1257	20.0948	20.1154
UCHL3	Ubiquitin carboxyl-terminal hydrolase;Ubiquitin carboxyl-terminal hydrolase isozyme L3	94	SGSTLKKFLEESVSMSPEERARYLENYDAIR	FLEESVSMS(1)PEER	1	19.6505	19.9596	19.9539	19.9693	19.8368	20.1331	19.8609	19.6531	19.8559	19.7415	19.6715	20.1121	20.4677	20.4149	20.3791	20.1097	19.9178	20.0383	19.8722	19.9728	20.0002	20.0672	19.7553	20.1248	19.9852	20.0213	19.9391	19.8828	19.7057	19.8515	19.6934	19.7986	19.8434	20.5748	20.9454	20.9669	20.9068	20.9224	20.7981	20.8154	20.771	20.6238	20.7899	20.6171
PTPDC1	Protein tyrosine phosphatase domain-containing protein 1	492	KPRQQKLISHCYIPQSPEPDLHKEALVRSTL	LISHCYIPQS(1)PEPDLHK	1	16.9688	16.9005	16.6952	16.8493	16.8829	17.2627	16.9879	16.8895	17.1161	17.0679	16.7979	17.9867	17.4976	17.8809	17.7972	17.761	17.4013	17.6657	17.6335	17.6298	17.6772	17.081	16.8805	16.7907	17.0168	16.7914	16.9207	16.9098	16.7662	16.5732	16.3972	17.0306	16.3275	19.2377	18.9466	19.4444	19.0418	19.0781	19.026	19.0808	18.7778	18.7214	19.1222	18.6583
NCAM1	Neural cell adhesion molecule 1	774	GKDMEEGKAAFSKDESKEPIVEVRTEEERTP	DES(1)KEPIVEVR	1	NaN	NaN	NaN	NaN	NaN	NaN	NaN	NaN	NaN	NaN	NaN	19.8092	19.0943	18.5118	18.5626	19.1449	20.5374	20.3601	19.8083	19.9237	19.9701	19.7825	NaN	NaN	NaN	NaN	NaN	NaN	NaN	NaN	NaN	NaN	NaN	20.0539	19.2245	19.1479	19.0568	19.1707	20.1848	20.4318	20.0303	19.9365	20.0315	19.929
CUL3	Cullin-3	311	LVAEVTQQLKARFLPSPVVIKKRIEGLIERE	FLPS(1)PVVIK	1	17.5109	18.2071	18.1056	17.9317	17.7937	17.6385	18.1774	17.7456	18.1288	18.139	17.9587	19.2381	19.8314	19.5627	19.3475	19.2647	18.9804	19.9027	19.2745	19.5918	19.5631	19.3175	NaN	NaN	NaN	NaN	NaN	NaN	NaN	NaN	NaN	NaN	NaN	NaN	NaN	NaN	NaN	NaN	NaN	NaN	NaN	NaN	NaN	NaN
MYB	Transcriptional activator Myb	653	ENGPPLLKKIKQEVESPTDKSGNFFCSHHWE	IKQEVES(0.96)PT(0.04)DK	1	NaN	NaN	NaN	NaN	NaN	NaN	NaN	NaN	NaN	NaN	NaN	NaN	NaN	NaN	NaN	NaN	NaN	NaN	NaN	NaN	NaN	NaN	NaN	NaN	NaN	NaN	NaN	NaN	NaN	NaN	NaN	NaN	NaN	19.9489	20.3141	20.4047	20.1983	20.4043	20.0763	20.1407	20.0163	20.0467	20.188	20.2922
TTC25	Tetratricopeptide repeat protein 25	360	KDLEIAKEYDLPDAKSRALDNIGRVFARVGK	DLEIAKEY(0.001)DLPDAKS(0.999)R	1	15.6509	15.8365	16.0019	15.7691	15.9171	16.0633	16.0301	15.7353	15.9819	15.9375	15.4456	17.1234	17.3262	17.117	17.22	17.1839	17.4342	17.1272	16.8028	17.1509	16.9008	16.8477	16.8685	17.2015	17.0235	16.7888	16.8245	17.1433	16.8874	16.534	17.0002	16.8985	16.7686	NaN	NaN	NaN	NaN	NaN	NaN	NaN	NaN	NaN	NaN	NaN
BCL2L13	Bcl-2-like protein 13	396	TETLLSEKEINAREESLVEELSPASEKKPVP	EINAREES(1)LVEELSPASEK	1;2	NaN	NaN	NaN	NaN	NaN	NaN	NaN	NaN	NaN	NaN	NaN	17.9983	18.1523	17.6835	17.0311	17.2358	17.9909	18.3073	17.7897	17.9663	17.8374	17.3742	19.1354	18.8786	18.7312	18.4744	18.169	18.9655	19.2101	18.6214	18.8383	18.7349	18.6323	18.4839	18.3601	17.9482	17.9438	17.4421	18.304	18.5907	17.8866	18.2946	18.0086	17.8646
BCL2L13	Bcl-2-like protein 13	402	EKEINAREESLVEELSPASEKKPVPPSEGKS	EINAREESLVEELS(1)PASEK	1;2	NaN	NaN	NaN	NaN	NaN	NaN	NaN	NaN	NaN	NaN	NaN	NaN	NaN	NaN	NaN	NaN	NaN	NaN	NaN	NaN	NaN	NaN	19.1545	19.139	19.0747	18.7959	18.8109	19.0197	19.0975	18.9535	18.9114	18.9748	19.0453	19.2751	19.3415	19.2025	18.9407	18.7887	19.2536	19.1955	18.9878	19.0587	18.98	18.9298
BCL2L13	Bcl-2-like protein 13	420	SEKKPVPPSEGKSRLSPAGEMKPMPLSEGKS	S(0.119)RLS(0.881)PAGEMK	1	NaN	NaN	NaN	NaN	NaN	NaN	NaN	NaN	NaN	NaN	NaN	NaN	NaN	NaN	NaN	NaN	NaN	NaN	NaN	NaN	NaN	NaN	NaN	NaN	NaN	NaN	NaN	NaN	NaN	NaN	NaN	NaN	NaN	NaN	NaN	NaN	NaN	NaN	NaN	NaN	NaN	NaN	NaN	NaN
BCL2L13	Bcl-2-like protein 13	346	LGTREPDTEVITVEKSSPATSLFVELDEEEV	S(0.5)S(0.5)PATSLFVELDEEEVK	1	NaN	NaN	NaN	NaN	NaN	NaN	NaN	NaN	NaN	NaN	NaN	NaN	NaN	NaN	NaN	NaN	NaN	NaN	NaN	NaN	NaN	NaN	NaN	NaN	NaN	NaN	NaN	NaN	NaN	NaN	NaN	NaN	NaN	19.0725	18.0539	17.2976	17.5394	17.5282	19.1309	19.4296	19.1573	19.1695	19.0112	18.9012
BCL2L13	Bcl-2-like protein 13	347	GTREPDTEVITVEKSSPATSLFVELDEEEVK	S(0.369)S(0.63)PATSLFVELDEEEVK	1	NaN	NaN	NaN	NaN	NaN	NaN	NaN	NaN	NaN	NaN	NaN	NaN	NaN	NaN	NaN	NaN	NaN	NaN	NaN	NaN	NaN	NaN	17.1454	16.4402	16.3158	16.4432	16.0603	17.3277	17.7528	17.4737	17.4483	17.4861	17.3523	19.0725	18.0539	17.2976	17.5394	17.5282	19.1309	19.4296	19.1573	19.1695	19.0112	18.9012
RNF34	E3 ubiquitin-protein ligase RNF34	62	AEDRNPGLSKERVRASLSDLSSLDDVEGMSV	VRAS(0.91)LS(0.089)DLSSLDDVEGMSVR	1	NaN	NaN	NaN	NaN	NaN	NaN	NaN	NaN	NaN	NaN	NaN	NaN	NaN	NaN	NaN	NaN	NaN	NaN	NaN	NaN	NaN	NaN	NaN	NaN	NaN	NaN	NaN	NaN	NaN	NaN	NaN	NaN	NaN	17.6266	17.1859	17.1732	16.9038	17.3946	18.0036	17.8972	18.3609	17.7594	18.1796	18.3214
WDR37	WD repeat-containing protein 37	30	KQKRKSHSLSIRRTNSSEQERTGLPRDMLEG	RT(0.002)NS(0.997)S(0.001)EQERTGLPR	1	17.7057	17.3564	17.6865	17.5189	17.7456	17.0461	17.5069	17.5252	17.6184	17.9808	17.4119	20.1029	19.9229	19.8964	19.8734	19.9904	20.0478	19.8997	20.0188	20.0215	20.0987	20.135	20.0105	19.7071	19.8852	19.795	19.7623	19.9877	19.9304	19.9611	19.7558	20.1326	19.8905	20.5081	20.2511	20.2771	20.1738	20.3473	20.4276	20.3495	20.6035	20.1562	20.3319	20.2672
WDR37	WD repeat-containing protein 37	31	QKRKSHSLSIRRTNSSEQERTGLPRDMLEGQ	TNS(0.096)S(0.901)EQERT(0.003)GLPR	1	17.1658	16.77	16.8536	17.0581	16.9244	17.3619	16.9399	16.8662	16.7477	17.1311	16.8039	18.2564	18.05	17.9454	18.0512	18.0501	18.3672	18.1837	18.1162	17.952	18.3403	18.2373	16.6991	16.6158	16.5887	16.5608	16.5317	16.591	16.7349	16.5844	16.3309	17.094	16.4625	18.0421	17.6757	17.6836	17.9089	17.9879	18.2708	18.2162	18.1962	17.8917	18.0327	18.1079
WDR37	WD repeat-containing protein 37	20	SASCSTARQTKQKRKSHSLSIRRTNSSEQER	S(0.907)HS(0.093)LSIR	1	NaN	NaN	NaN	NaN	NaN	NaN	NaN	NaN	NaN	NaN	NaN	NaN	NaN	NaN	NaN	NaN	NaN	NaN	NaN	NaN	NaN	NaN	NaN	NaN	NaN	NaN	NaN	NaN	NaN	NaN	NaN	NaN	NaN	15.524	15.1402	15.6184	15.0129	14.3678	15.4712	15.5358	15.6949	15.1604	14.8507	15.528
WDR37	WD repeat-containing protein 37	22	SCSTARQTKQKRKSHSLSIRRTNSSEQERTG	S(0.006)HS(0.988)LS(0.006)IR	1	NaN	NaN	NaN	NaN	NaN	NaN	NaN	NaN	NaN	NaN	NaN	NaN	NaN	NaN	NaN	NaN	NaN	NaN	NaN	NaN	NaN	NaN	17.5343	17.3558	17.7697	17.6451	17.6426	17.9126	17.6765	17.916	17.4686	17.6712	17.8197	NaN	NaN	NaN	NaN	NaN	NaN	NaN	NaN	NaN	NaN	NaN
WDR37	WD repeat-containing protein 37	24	STARQTKQKRKSHSLSIRRTNSSEQERTGLP	SHS(0.003)LS(0.997)IRR	1	NaN	NaN	NaN	NaN	NaN	NaN	NaN	NaN	NaN	NaN	NaN	NaN	NaN	NaN	NaN	NaN	NaN	NaN	NaN	NaN	NaN	NaN	16.436	16.6382	16.8302	16.7299	16.436	16.3752	16.521	16.7283	16.4016	16.7233	16.6554	NaN	NaN	NaN	NaN	NaN	NaN	NaN	NaN	NaN	NaN	NaN
DDB2	DNA damage-binding protein 2	24	TQKTSEIVLRPRNKRSRSPLELEPEAKKLCA	S(1)RS(1)PLELEPEAK	1;2	19.2477	19.0014	19.1004	19.2942	19.3477	21.6078	19.6435	19.474	19.6223	19.6898	19.6293	22.5424	22.8197	22.8413	22.7916	22.7506	25.7758	23.1768	22.7327	23.0711	22.9897	23.0222	17.8465	17.4012	17.7318	17.6462	17.6029	18.0173	18.197	17.8925	17.8424	18.8302	18.0417	22.427	22.2175	22.5052	22.393	22.2983	22.5322	22.534	22.5383	22.2191	22.3517	22.5603
DDB2	DNA damage-binding protein 2	26	KTSEIVLRPRNKRSRSPLELEPEAKKLCAKG	S(1)RS(1)PLELEPEAK	1;2	21.3398	21.1307	21.4363	21.3573	21.2911	24.4072	21.8226	21.2641	21.7277	21.7393	21.7689	22.0289	22.4026	22.3688	22.3538	22.3059	24.7919	22.6226	22.132	22.4845	22.4469	22.3789	20.7756	20.4324	20.6972	20.4863	20.5409	20.8763	20.8836	20.801	20.5852	20.7438	20.9148	22.8016	22.317	22.5503	22.4836	22.4233	23.0023	23.3547	22.8611	22.726	23.259	22.8694
FAM92A1	Protein FAM92A1	88	PDYSSRLDIVRANSKSPLQRSLSAKCVSGTG	ANS(1)KS(1)PLQR	1;2	18.3408	19.1249	18.7689	19.006	19.1474	21.1214	18.9695	19.0296	19.0875	19.3555	19.0023	19.0173	19.6519	19.3853	19.7481	19.7905	21.7197	19.7055	19.8828	19.964	19.8601	19.5073	NaN	NaN	NaN	NaN	NaN	NaN	NaN	NaN	NaN	NaN	NaN	19.8282	20.5443	20.2614	20.3248	20.241	20.255	21.1115	20.3546	20.2992	21.9669	20.6416
PABPC1	Polyadenylate-binding protein 1;Polyadenylate-binding protein	434	RAAYYPPSQIAQLRPSPRWTAQGARPHPFQN	AAY(1)Y(1)PPS(1)QIAQLRPS(1)PR	1;4	NaN	NaN	NaN	NaN	NaN	NaN	NaN	NaN	NaN	NaN	NaN	NaN	NaN	NaN	NaN	NaN	NaN	NaN	NaN	NaN	NaN	NaN	NaN	NaN	NaN	NaN	NaN	NaN	NaN	NaN	NaN	NaN	NaN	18.3731	18.5726	18.4779	18.3846	18.1516	18.075	18.2952	18.0248	18.2843	18.4219	18.3011
PABPC1	Polyadenylate-binding protein 1;Polyadenylate-binding protein	315	NLDDGIDDERLRKEFSPFGTITSAKVMMEGG	EFS(1)PFGTITSAK	1	NaN	NaN	NaN	NaN	NaN	NaN	NaN	NaN	NaN	NaN	NaN	NaN	NaN	NaN	NaN	NaN	NaN	NaN	NaN	NaN	NaN	NaN	19.9014	20.4102	19.862	19.7655	19.4319	20.0309	19.7549	19.0971	19.5074	19.9493	19.2344	19.6126	20.1791	19.5058	19.4957	19.1591	19.7706	19.5734	18.5455	19.1193	19.5711	18.6382
PABPC1;PABPC3;PABPC1L;PABPC4	Polyadenylate-binding protein 1;Polyadenylate-binding protein;Polyadenylate-binding protein 3;Polyadenylate-binding protein 1-like;Polyadenylate-binding protein 4	341	MLEDGRSKGFGFVCFSSPEEATKAVTEMNGR;MMEGGRSKGFGFVCFSSPEEATKAVTEMNGR	GFGFVCFS(0.5)S(0.5)PEEATK	1	NaN	NaN	NaN	NaN	NaN	NaN	NaN	NaN	NaN	NaN	NaN	NaN	NaN	NaN	NaN	NaN	NaN	NaN	NaN	NaN	NaN	NaN	NaN	NaN	NaN	NaN	NaN	NaN	NaN	NaN	NaN	NaN	NaN	NaN	NaN	NaN	NaN	NaN	NaN	NaN	NaN	NaN	NaN	NaN
PABPC1;PABPC3;PABPC1L;PABPC4	Polyadenylate-binding protein 1;Polyadenylate-binding protein;Polyadenylate-binding protein 3;Polyadenylate-binding protein 1-like;Polyadenylate-binding protein 4	342	LEDGRSKGFGFVCFSSPEEATKAVTEMNGRI;MEGGRSKGFGFVCFSSPEEATKAVTEMNGRI	GFGFVCFS(0.005)S(0.995)PEEATK	1	19.6328	20.4149	19.8534	19.8583	19.4184	20.065	20.0084	19.0115	19.6368	19.6522	19.2135	20.2897	21.2085	20.5068	20.568	20.222	20.6481	20.6165	19.4131	20.2848	20.3271	19.6193	19.3898	19.7943	19.2655	19.3457	18.8942	19.5951	19.4708	18.6144	18.985	19.5305	18.6285	20.0998	20.4807	19.8671	19.6393	19.5865	20.0916	19.9196	18.7512	19.4176	19.8731	18.7306
PABPC1;PABPC3;PABPC4	Polyadenylate-binding protein 1;Polyadenylate-binding protein;Polyadenylate-binding protein 3;Polyadenylate-binding protein 4	92	IKGKPIRIMWSQRDPSLRKSGVGNVFIKNLD;IKGKPVRIMWSQRDPSLRKSGVGNIFIKNLD	IMWS(0.014)QRDPS(0.986)LRK	1	NaN	NaN	NaN	NaN	NaN	NaN	NaN	NaN	NaN	NaN	NaN	NaN	NaN	NaN	NaN	NaN	NaN	NaN	NaN	NaN	NaN	NaN	16.7322	17.1875	17.4499	17.0779	17.3212	16.8662	16.8814	17.0046	16.9308	17.0322	17.2295	NaN	NaN	NaN	NaN	NaN	NaN	NaN	NaN	NaN	NaN	NaN
PABPC1;PABPC4	Polyadenylate-binding protein 1;Polyadenylate-binding protein;Polyadenylate-binding protein 4	599	MLLEIDNSELLHMLESPESLRSKVDEAVAVL	ITGMLLEIDNS(0.004)ELLHMLES(0.923)PES(0.073)LR	1	14.7183	14.8941	14.4515	14.5454	14.6768	15.5388	14.8772	14.1473	14.4676	15.2081	14.3554	NaN	NaN	NaN	NaN	NaN	NaN	NaN	NaN	NaN	NaN	NaN	15.4647	15.4437	14.9619	15.2063	14.6081	15.6825	15.5778	15.2614	14.864	15.2799	14.5127	NaN	NaN	NaN	NaN	NaN	NaN	NaN	NaN	NaN	NaN	NaN
TMEM230	Transmembrane protein 230	24	ATGIPSSKVKYSRLSSTDDGYIDLQFKKTPP	LS(0.005)S(0.932)T(0.063)DDGYIDLQFK	1	NaN	NaN	NaN	NaN	NaN	NaN	NaN	NaN	NaN	NaN	NaN	18.9951	18.3884	18.1742	17.8927	18.1636	19.6071	18.4972	18.2055	18.4877	18.4181	17.9455	NaN	NaN	NaN	NaN	NaN	NaN	NaN	NaN	NaN	NaN	NaN	21.1442	20.6399	20.3973	20.3218	20.4017	21.0318	21.1313	20.5535	20.7604	21.1588	20.3497
LRRC41	Leucine-rich repeat-containing protein 41	254	PPCRLCGEASRGRAPSRDEGSLLLGSRRPRR	GRAPS(1)RDEGSLLLGSR	1	18.9651	18.3485	18.4993	18.6893	18.5381	18.6003	18.5245	18.4033	18.9048	18.529	18.5264	NaN	NaN	NaN	NaN	NaN	NaN	NaN	NaN	NaN	NaN	NaN	19.1025	18.6765	18.9303	18.8908	18.735	19.0935	18.9236	18.8136	18.8289	18.8777	18.7677	18.8123	18.1951	18.3255	18.1953	18.1276	18.6008	18.6113	18.4614	18.2805	18.6392	18.2851
LRRC41	Leucine-rich repeat-containing protein 41	335	LHPPATSHEAPGTKRSPSAPAATSSASSSTS	S(0.988)PS(0.012)APAATSSASSSTSSYK	1	19.3133	19.468	19.3598	19.3763	19.1668	17.5847	19.4913	19.3881	19.6763	19.2065	19.5112	19.6417	19.7659	19.6138	19.4564	19.4778	18.4743	19.747	19.7331	19.9484	19.578	19.7612	19.4452	19.0929	19.117	19.0337	18.7789	19.2212	18.8332	19.1754	19.0767	17.9836	19.1165	20.6042	20.2329	20.2197	20.0863	19.9799	20.4869	19.9198	20.2676	20.3589	19.447	20.2576
LRRC41	Leucine-rich repeat-containing protein 41	337	PPATSHEAPGTKRSPSAPAATSSASSSTSSY	RS(0.009)PS(0.991)APAATSSASSSTSSYK	1	16.1709	15.772	16.0348	15.9541	16.282	15.3959	16.0051	16.1193	16.3407	16.1254	15.9767	18.5677	17.9539	18.3321	18.2809	18.4716	17.6804	18.3152	18.4842	18.718	18.4697	18.5441	17.0493	17.0381	17.0767	16.7949	16.9892	16.8583	16.6949	16.9725	17.0062	16.901	17.0885	17.9751	17.9619	18.0083	17.9351	17.9834	17.9265	18.0898	18.2205	17.7745	18.027	18.0501
LRRC41	Leucine-rich repeat-containing protein 41	304	KQMPRAAPATRVTRRSTQESLTAGGTDLKRE	RS(0.5)T(0.5)QESLTAGGTDLK	1	NaN	NaN	NaN	NaN	NaN	NaN	NaN	NaN	NaN	NaN	NaN	20.5174	19.9235	20.0617	19.9933	20.2975	19.073	20.1524	20.4499	20.7202	20.2207	20.3811	NaN	NaN	NaN	NaN	NaN	NaN	NaN	NaN	NaN	NaN	NaN	NaN	NaN	NaN	NaN	NaN	NaN	NaN	NaN	NaN	NaN	NaN
TEX264	Testis-expressed sequence 264 protein	170	LEVSPGSRETSAATLSPGASSRGWDDGDTRS	ETSAAT(0.02)LS(0.975)PGAS(0.002)S(0.003)R	1	19.0962	19.3398	18.8158	18.5961	18.7977	19.3914	19.0665	18.8869	18.9336	18.8789	18.7943	NaN	NaN	NaN	NaN	NaN	NaN	NaN	NaN	NaN	NaN	NaN	NaN	NaN	NaN	NaN	NaN	NaN	NaN	NaN	NaN	NaN	NaN	NaN	NaN	NaN	NaN	NaN	NaN	NaN	NaN	NaN	NaN	NaN
NOL4L	Nucleolar protein 4-like	130	GLRSRVKYGVKTTPESPPYSSGSYDSIKTEV	T(0.002)T(0.002)PES(0.972)PPY(0.018)S(0.005)S(0.001)GSYDSIK	1	NaN	NaN	NaN	NaN	NaN	NaN	NaN	NaN	NaN	NaN	NaN	NaN	NaN	NaN	NaN	NaN	NaN	NaN	NaN	NaN	NaN	NaN	NaN	NaN	NaN	NaN	NaN	NaN	NaN	NaN	NaN	NaN	NaN	NaN	NaN	NaN	NaN	NaN	NaN	NaN	NaN	NaN	NaN	NaN
ALMS1	Alstrom syndrome protein 1	92	KAWLQAHPGRILPPLSPPQHRYSEGERTSLE	ILPPLS(1)PPQHR	1	17.2627	17.5331	17.6105	17.3578	17.4325	17.5587	17.2657	17.1785	17.1964	17.1961	17.0852	17.4186	17.931	17.8621	17.4246	17.6399	17.5741	16.9079	17.0254	17.2619	16.8631	17.0094	16.9887	17.4055	17.3645	17.4251	17.2374	17.0564	17.6062	17.2869	17.277	17.7649	17.3731	19.2306	19.5361	19.7531	19.7009	19.6473	19.2746	19.622	19.4105	19.2049	19.7824	19.4688
ALMS1	Alstrom syndrome protein 1	464	RESEYHSSDLRMLRMSPDTVPKAPKHLKAGD	MLRMS(1)PDTVPK	1	17.8764	18.3558	18.3335	18.4517	18.3243	18.2115	18.442	18.0857	18.4628	17.9596	18.3406	19.8169	20.0085	19.9879	20.1766	20.1224	20.0571	20.1504	20.0231	20.3168	20.0828	20.1722	18.1393	17.9998	18.2049	18.211	17.9748	18.0532	18.1225	18.1429	18.039	18.159	18.2754	20.0903	20.1893	20.3589	20.4227	20.2219	20.3248	20.3724	20.4002	20.2905	20.3577	20.4175
ALMS1	Alstrom syndrome protein 1	2466	SPKTSITDSREEEGVSESEDGGGSSVDSLAA	TSITDS(0.001)REEEGVS(0.746)ES(0.254)EDGGGSSVDSLAAHVK	1	18.7275	18.5934	18.7047	18.6285	18.7949	18.6893	18.8886	19.089	18.9234	19.0437	19.0656	NaN	NaN	NaN	NaN	NaN	NaN	NaN	NaN	NaN	NaN	NaN	NaN	NaN	NaN	NaN	NaN	NaN	NaN	NaN	NaN	NaN	NaN	NaN	NaN	NaN	NaN	NaN	NaN	NaN	NaN	NaN	NaN	NaN
PYCR2	Pyrroline-5-carboxylate reductase;Pyrroline-5-carboxylate reductase 2	229	DRVKLESPTVSTLTPSSPGKLLTRSLALGGK	LESPTVSTLTPS(0.594)S(0.406)PGK	1	NaN	NaN	NaN	NaN	NaN	NaN	NaN	NaN	NaN	NaN	NaN	19.4298	19.0528	19.3519	19.2312	19.1127	19.0689	19.4762	19.3649	19.3806	19.576	19.2722	NaN	NaN	NaN	NaN	NaN	NaN	NaN	NaN	NaN	NaN	NaN	NaN	NaN	NaN	NaN	NaN	NaN	NaN	NaN	NaN	NaN	NaN
PYCR2	Pyrroline-5-carboxylate reductase;Pyrroline-5-carboxylate reductase 2	230	RVKLESPTVSTLTPSSPGKLLTRSLALGGKK	LESPTVSTLTPSS(1)PGK	1	NaN	NaN	NaN	NaN	NaN	NaN	NaN	NaN	NaN	NaN	NaN	18.7637	18.7859	18.7156	18.6606	18.272	17.8889	19.014	18.7778	19.1885	18.9444	18.445	17.8254	17.7902	17.6694	17.3835	17.5798	17.6176	17.8763	17.2956	17.5546	17.6266	17.2075	18.6493	18.4267	18.6001	18.1587	18.0845	18.0298	18.5959	18.0951	18.3172	18.2741	17.8679
UHRF1	E3 ubiquitin-protein ligase UHRF1	178	AWFEAQVVRVTRKAPSRDEPCSSTSRPALEE	APS(0.911)RDEPCS(0.022)S(0.022)T(0.022)S(0.022)RPALEEDVIYHVK	1	NaN	NaN	NaN	NaN	NaN	NaN	NaN	NaN	NaN	NaN	NaN	NaN	NaN	NaN	NaN	NaN	NaN	NaN	NaN	NaN	NaN	NaN	NaN	NaN	NaN	NaN	NaN	NaN	NaN	NaN	NaN	NaN	NaN	17.7469	16.904	16.6887	16.7366	16.9131	17.8439	16.7353	18.0077	17.7235	16.6568	17.9751
UHRF1	E3 ubiquitin-protein ligase UHRF1	720	KLWNEVLASLKDRPASGSPFQLFLSKVEETF	DRPAS(0.555)GS(0.445)PFQLFLSK	1	18.188	18.6864	18.1826	18.4009	18.1106	18.1292	18.4551	17.8929	18.6178	18.2803	18.0902	NaN	NaN	NaN	NaN	NaN	NaN	NaN	NaN	NaN	NaN	NaN	NaN	NaN	NaN	NaN	NaN	NaN	NaN	NaN	NaN	NaN	NaN	NaN	NaN	NaN	NaN	NaN	NaN	NaN	NaN	NaN	NaN	NaN
UHRF1	E3 ubiquitin-protein ligase UHRF1	652	NSKREEEEQQEGGFASPRTGKGKWKRKSAGG	REEEEQQEGGFAS(1)PR	1	21.0863	21.9022	21.4154	21.3793	21.19	22.8788	21.5981	20.9461	21.5728	21.2201	21.1404	22.0662	23.328	22.953	22.8781	22.5818	24.1325	22.7676	21.886	22.5897	22.3469	21.9899	21.9065	22.4896	21.6197	21.5428	21.1841	22.1014	22.3296	21.4151	21.6249	22.3533	21.2621	22.3611	23.0513	22.3756	22.1851	21.9787	22.514	22.4337	21.7864	21.9792	22.5204	21.8193
UHRF1	E3 ubiquitin-protein ligase UHRF1	104	SLVLPHSTKERDSELSDTDSGCCLGQSESDK	ERDS(1)ELS(1)DT(0.002)DS(0.998)GCCLGQSESDK	1;2;3	18.988	19.2169	19.1057	19.2352	19.2908	19.218	19.3192	19.4865	19.7498	19.4243	19.7398	20.6609	21.0021	20.7877	20.8879	21.0125	20.7739	20.9714	21.1055	21.3676	20.9203	21.2107	18.9713	19.1207	19.0942	18.9768	18.8779	18.971	19.0594	19.2745	18.9142	19.0371	19.2098	21.3662	21.666	21.5556	21.4005	21.6494	21.5464	21.8384	21.9079	21.4718	21.5311	21.7595
UHRF1	E3 ubiquitin-protein ligase UHRF1	108	PHSTKERDSELSDTDSGCCLGQSESDKSSTH	ERDSELS(0.999)DT(0.001)DS(1)GCCLGQSESDK	1;2;3	NaN	NaN	NaN	NaN	NaN	NaN	NaN	NaN	NaN	NaN	NaN	18.3532	18.1714	18.3213	17.955	18.1486	18.1868	17.9631	19.3911	18.4519	19.9172	17.5519	19.0587	19.2325	19.1018	18.9167	18.9183	19.0232	19.0348	19.3527	19.1637	19.0138	19.3077	NaN	NaN	NaN	NaN	NaN	NaN	NaN	NaN	NaN	NaN	NaN
UHRF1	E3 ubiquitin-protein ligase UHRF1	300	IFVDEVFKIERPGEGSPMVDNPMRRKSGPSC	IIFVDEVFKIERPGEGS(1)PMVDNPMR	1	20.599	20.7658	20.6267	20.4741	20.3578	21.1122	20.9303	20.3699	20.8205	20.6745	20.5463	22.2733	22.6206	22.3286	22.2292	22.1306	22.1405	22.6684	22.0803	22.3394	22.2295	22.156	20.6394	20.7056	20.6974	20.4061	20.3738	20.8395	20.6888	20.5336	20.4419	20.6265	20.457	22.4316	22.5944	22.4701	22.2706	22.1116	22.7099	22.4336	22.1681	22.1978	21.8178	22.1183
UHRF1	E3 ubiquitin-protein ligase UHRF1	405	LRESKKKAKMASATSSSQRDWGKGMACVGRT	MAS(0.081)AT(0.081)S(0.081)S(0.678)S(0.081)QRDWGK	1	NaN	NaN	NaN	NaN	NaN	NaN	NaN	NaN	NaN	NaN	NaN	18.0407	18.5811	18.4735	18.4103	18.5008	18.0192	18.3326	18.5987	18.5036	18.4177	18.2138	NaN	NaN	NaN	NaN	NaN	NaN	NaN	NaN	NaN	NaN	NaN	NaN	NaN	NaN	NaN	NaN	NaN	NaN	NaN	NaN	NaN	NaN
UHRF1	E3 ubiquitin-protein ligase UHRF1	406	RESKKKAKMASATSSSQRDWGKGMACVGRTK	MAS(0.006)AT(0.03)S(0.006)S(0.03)S(0.928)QRDWGK	1	16.8622	17.7787	17.3667	17.3852	17.4632	17.1722	17.2728	17.5722	17.3449	17.6261	17.1257	NaN	NaN	NaN	NaN	NaN	NaN	NaN	NaN	NaN	NaN	NaN	NaN	NaN	NaN	NaN	NaN	NaN	NaN	NaN	NaN	NaN	NaN	NaN	NaN	NaN	NaN	NaN	NaN	NaN	NaN	NaN	NaN	NaN
UHRF1	E3 ubiquitin-protein ligase UHRF1	674	KWKRKSAGGGPSRAGSPRRTSKKTKVEPYSL	SAGGGPSRAGS(1)PR	1	17.7909	17.9058	17.663	17.7975	18.1865	16.7375	17.7666	18.3714	18.6259	18.4961	18.1852	17.4668	17.7587	17.6555	17.7165	17.9789	16.7666	17.7625	18.208	18.556	18.3716	18.0657	19.3237	20.1257	19.4342	19.4545	19.477	19.523	18.5022	19.993	20.1701	19.6372	20.3876	19.689	20.5619	20.0657	19.9908	20.0454	20.045	19.0679	20.5475	20.6187	20.1777	20.976
UHRF1	E3 ubiquitin-protein ligase UHRF1	132	SDKSSTHGEAAAETDSRPADEDMWDETELGL	S(0.01)S(0.01)T(0.01)HGEAAAET(0.439)DS(0.53)RPADEDMWDETELGLYK	1	NaN	NaN	NaN	NaN	NaN	NaN	NaN	NaN	NaN	NaN	NaN	NaN	NaN	NaN	NaN	NaN	NaN	NaN	NaN	NaN	NaN	NaN	16.806	17.355	16.569	16.3044	16.8956	17.1729	16.4469	16.5296	16.2507	16.394	16.3645	NaN	NaN	NaN	NaN	NaN	NaN	NaN	NaN	NaN	NaN	NaN
CASP8AP2	CASP8-associated protein 2	18	ADDDNGDGTSLFDVFSASPLKNNDEGSLDIY	AADDDNGDGT(0.007)S(0.007)LFDVFS(0.593)AS(0.392)PLK	1	15.3486	15.4716	15.3426	15.9657	15.5609	15.615	15.3121	15.5209	15.9506	15.7468	15.7153	NaN	NaN	NaN	NaN	NaN	NaN	NaN	NaN	NaN	NaN	NaN	16.2696	16.2706	16.5084	16.263	16.2308	16.3715	16.1542	16.2611	16.1835	16.3038	16.2294	NaN	NaN	NaN	NaN	NaN	NaN	NaN	NaN	NaN	NaN	NaN
CASP8AP2	CASP8-associated protein 2	20	DDNGDGTSLFDVFSASPLKNNDEGSLDIYAG	AADDDNGDGTSLFDVFSAS(1)PLK	1	13.4282	13.605	13.837	13.8629	14.1108	13.4042	14.0022	13.7656	13.9866	14.1828	14.3273	16.2616	16.5863	16.6843	16.6964	16.82	16.3128	16.7502	16.7052	16.9044	16.5948	16.8451	13.4633	14.096	14.0567	13.9924	14.0487	14.0405	13.7657	13.9846	14.4991	14.1684	14.2065	18.1417	18.4123	18.4049	18.2768	18.2474	18.1778	18.1897	18.3242	18.2472	18.3081	18.4231
CASP8AP2	CASP8-associated protein 2	1368	SIPACTTEELVSGVASPCPKMISDDNWSLLS	CESIPACT(0.022)T(0.022)EELVS(0.134)GVAS(0.822)PCPK	1	16.8068	16.8679	16.527	17.0182	16.9998	17.2149	17.2623	17.1522	17.5695	16.893	17.4011	NaN	NaN	NaN	NaN	NaN	NaN	NaN	NaN	NaN	NaN	NaN	NaN	NaN	NaN	NaN	NaN	NaN	NaN	NaN	NaN	NaN	NaN	NaN	NaN	NaN	NaN	NaN	NaN	NaN	NaN	NaN	NaN	NaN
CASP8AP2	CASP8-associated protein 2	567	KDLKLSFMKKLNLTLSPAKKQPVSQDNQHKI	LNLTLS(1)PAK	1	20.0323	20.3753	20.3087	20.3511	20.3696	19.2911	20.0769	20.1172	20.5547	20.2409	20.2851	21.302	21.735	21.6966	21.7473	21.7195	21.018	21.3429	21.6343	21.8761	21.4272	21.7524	20.2676	20.3682	20.5659	20.2914	20.1609	20.0938	20.1352	20.3198	20.2769	20.4285	20.3433	21.2038	21.3631	21.4652	21.3752	21.1646	21.103	21.1462	21.3415	21.2395	21.3954	21.2212
CASP8AP2	CASP8-associated protein 2	940	CKNSPLDELEEGEIRSDSETSKPQESFEKNS	NSPLDELEEGEIRS(1)DSETSKPQESFEK	1	20.9704	21.3971	21.4024	21.4133	21.5246	21.2418	21.2053	21.2962	21.5443	21.3608	21.4901	21.1394	21.3412	21.3721	21.6906	21.5839	21.3619	21.3177	21.4671	21.6601	21.2905	21.6628	20.6779	20.8637	21.0052	20.8747	20.8397	20.6725	20.7624	20.9173	20.791	20.9459	20.9341	19.2694	19.3856	19.5274	19.3562	19.384	18.9183	19.2744	19.6373	19.2999	19.1448	19.4078
CASP8AP2	CASP8-associated protein 2	1260	KNSQSEERSLEVHCPSTPKSEKNEGSSIEDA	SLEVHCPS(0.608)T(0.392)PK	1	NaN	NaN	NaN	NaN	NaN	NaN	NaN	NaN	NaN	NaN	NaN	19.7841	20.3292	20.0934	19.9791	20.0211	20.055	19.849	19.8907	20.4518	19.9999	20.1278	NaN	NaN	NaN	NaN	NaN	NaN	NaN	NaN	NaN	NaN	NaN	19.7163	19.9922	19.5151	19.6795	19.4578	19.9454	19.47	19.8474	19.6752	19.7026	19.5666
CASP8AP2	CASP8-associated protein 2	1537	QYHPNLPMHAVIMEKSNDHFIVKIRRATPST	S(1)NDHFIVK	1	18.9255	18.1727	18.1771	18.3469	18.5956	18.6866	18.7777	19.162	18.873	19.2179	18.7722	21.0893	19.9891	20.0032	19.9732	20.554	20.481	20.6613	21.2878	20.9671	21.1828	20.7407	NaN	NaN	NaN	NaN	NaN	NaN	NaN	NaN	NaN	NaN	NaN	19.6725	18.9412	19.2123	18.7016	18.853	19.713	20.0502	19.479	19.4865	20.0455	19.5784
CASP8AP2	CASP8-associated protein 2	875	LNSPVRPVAKVLRNESPPQVPVYNNSHKDVF	VLRNES(1)PPQVPVYNNSHK	1	18.68	19.268	19.1387	19.2002	19.2353	19.2886	18.9004	18.8755	19.2598	18.9931	18.9888	20.0907	20.7706	20.4591	20.5134	20.4376	20.1726	20.3685	20.3932	20.6581	20.4798	20.4566	18.1252	18.6732	18.7108	18.5429	18.6711	18.6314	18.1345	18.3243	18.2521	18.6462	18.2095	19.9608	20.5312	20.7025	20.6142	20.5114	20.1898	20.1367	20.3659	20.1125	20.3692	20.3231
POLR1D		74	RSHPYKHSFRARGSASYSPPRKRSSQDKYEK	GS(0.022)AS(0.942)Y(0.057)S(0.98)PPRK	1;2	NaN	NaN	NaN	NaN	NaN	NaN	NaN	NaN	NaN	NaN	NaN	NaN	NaN	NaN	NaN	NaN	NaN	NaN	NaN	NaN	NaN	NaN	NaN	NaN	NaN	NaN	NaN	NaN	NaN	NaN	NaN	NaN	NaN	NaN	NaN	NaN	NaN	NaN	NaN	NaN	NaN	NaN	NaN	NaN
POLR1D		76	HPYKHSFRARGSASYSPPRKRSSQDKYEKRS	GSASYS(1)PPRK	1;2	23.1864	23.6862	23.551	23.4514	23.5017	21.1589	23.3357	23.1978	23.5645	23.5296	23.3038	22.4292	23.0639	22.8552	22.8292	22.9507	20.7544	22.8054	22.4166	22.979	22.8319	22.6504	22.7301	23.0205	23.0087	22.7611	22.8388	22.7283	22.6531	22.6919	22.6397	22.5946	22.6258	23.2412	23.611	23.4343	23.4529	23.3138	23.3257	23.2235	23.2006	23.1709	23.3483	23.2021
UBXN1	UBX domain-containing protein 1	140	GSQPPPVAPEPGPVPSSPSQEPPTKREYDQC	KYGGSVGSQPPPVAPEPGPVPS(0.56)S(0.404)PS(0.036)QEPPTKR	1	NaN	NaN	NaN	NaN	NaN	NaN	NaN	NaN	NaN	NaN	NaN	NaN	NaN	NaN	NaN	NaN	NaN	NaN	NaN	NaN	NaN	NaN	NaN	NaN	NaN	NaN	NaN	NaN	NaN	NaN	NaN	NaN	NaN	15.5746	15.9587	15.815	15.8194	15.9907	15.363	18.3641	15.2396	15.1879	19.919	15.5134
UBXN1	UBX domain-containing protein 1	141	SQPPPVAPEPGPVPSSPSQEPPTKREYDQCR	YGGSVGSQPPPVAPEPGPVPS(0.018)S(0.911)PS(0.071)QEPPTK	1	20.6517	21.1381	20.9635	20.9917	20.9223	21.5531	20.7208	20.437	20.8156	20.6109	20.4956	21.3136	21.8816	21.6386	21.6613	21.5657	19.2001	21.3358	20.7547	21.2186	20.9727	21.0008	19.021	19.2394	18.873	19.0274	19.0416	18.8685	18.4662	18.5241	18.9581	18.021	18.5927	20.5225	20.995	20.8253	20.6991	20.5967	20.6605	21.4083	20.2709	20.4212	21.6795	20.2767
UBXN1	UBX domain-containing protein 1	211	QDPVQLLSGFPRRAFSEADMERPLQELGLVP	RAFS(0.998)EADMERPLQELGLVPS(0.002)AVLIVAK	1	14.3735	14.3727	14.4648	14.4633	14.1903	14.7912	14.7175	14.7458	14.9919	14.5516	14.8608	14.8214	14.7149	15.1667	15.2166	14.8537	14.8991	15.3163	15.0935	15.2047	15.0238	15.1091	NaN	NaN	NaN	NaN	NaN	NaN	NaN	NaN	NaN	NaN	NaN	16.1711	16.0252	16.1603	16.1439	16.0009	15.8752	15.9418	16.1778	16.1816	16.392	16.0973
NSMCE2	E3 SUMO-protein ligase NSE2	113	PDLKLLVEKKFLALQSKNSDADFQNNEKFVQ	FLALQS(0.5)KNS(0.5)DADFQNNEK	1	NaN	NaN	NaN	NaN	NaN	NaN	NaN	NaN	NaN	NaN	NaN	NaN	NaN	NaN	NaN	NaN	NaN	NaN	NaN	NaN	NaN	NaN	17.7895	17.84	17.7946	17.398	17.554	17.8973	17.9818	17.8606	18.1603	18.0226	18.0543	NaN	NaN	NaN	NaN	NaN	NaN	NaN	NaN	NaN	NaN	NaN
NSMCE2	E3 SUMO-protein ligase NSE2	116	KLLVEKKFLALQSKNSDADFQNNEKFVQFKQ	NS(1)DADFQNNEK	1	19.4748	19.7706	19.8577	19.6738	20.1442	20.4755	19.7611	20.1793	20.3165	20.169	19.832	19.2829	19.6962	19.2847	19.3462	19.9586	20.2552	19.7839	20.1783	20.1348	19.8539	19.6084	17.7895	17.84	17.7946	17.398	17.554	17.8973	17.9818	17.8606	18.1603	18.0226	18.0543	18.7116	18.5871	18.3456	18.1567	18.2663	18.5639	18.832	18.5329	18.4455	18.7824	18.6193
CMIP	C-Maf-inducing protein	190	PCDRKPTLPLRLLHPSPDLVSQEATLSEARL	LLHPS(1)PDLVSQEATLSEAR	1	16.0497	16.2619	15.8703	15.8822	15.4841	16.226	16.2344	16.4812	16.8101	16.2875	16.1185	NaN	NaN	NaN	NaN	NaN	NaN	NaN	NaN	NaN	NaN	NaN	NaN	NaN	NaN	NaN	NaN	NaN	NaN	NaN	NaN	NaN	NaN	17.2495	17.5457	17.4363	17.1204	17.0805	17.2418	17.2402	17.3456	16.9651	17.0869	17.0863
ELF4	ETS-related transcription factor Elf-4	151	FPASEPDALNRAGDTSDQEGHSLEEKASREE	AGDT(0.112)S(0.888)DQEGHSLEEK	1	NaN	NaN	NaN	NaN	NaN	NaN	NaN	NaN	NaN	NaN	NaN	19.7491	20.2529	20.2771	20.321	20.1514	20.1886	20.1325	20.1478	20.2271	20.2065	20.19	NaN	NaN	NaN	NaN	NaN	NaN	NaN	NaN	NaN	NaN	NaN	19.8413	20.1003	20.0411	20.0772	20.0454	20.164	20.4033	20.1666	19.8139	20.0069	19.8959
ELF4	ETS-related transcription factor Elf-4	188	KSKKRIRKTKGNRSTSPVTDPSIPIRKKSKD	S(0.009)T(0.009)S(0.944)PVT(0.037)DPSIPIRK	1	19.5234	19.6784	19.6488	19.7422	19.5335	19.1239	19.7114	19.6569	19.6888	19.6541	19.7278	20.2153	20.479	20.4506	20.6331	20.2619	19.8288	20.2947	20.3412	20.4729	20.3008	20.3533	17.2747	17.3515	17.3722	17.3614	17.3478	17.4705	17.4615	17.3112	17.0039	17.4711	17.3578	20.2798	20.2915	20.4487	20.358	20.3175	20.2989	20.2964	20.4508	20.1303	20.2457	20.2998
POLA1	DNA polymerase;DNA polymerase alpha catalytic subunit	209	FSVHTATAVPSGKIASPVSRKEPPLTPVPLK	IAS(1)PVSRK	1;2	19.239	19.2831	19.3142	19.3297	19.3725	19.7096	19.3297	19.1228	19.4095	19.1165	19.0566	22.4347	22.7569	22.6148	22.5351	22.6573	22.2491	22.5036	22.3137	22.6448	22.3401	22.3297	20.1056	20.3958	20.3417	20.1992	20.1755	20.1675	19.9583	20.0139	20.0708	19.7522	19.9113	21.615	22.002	22.1886	21.9576	21.8688	21.6881	21.505	21.5137	21.5567	21.3471	21.403
MKL1;mkl1	MKL/myocardin-like protein 1	507	SPLQILVKEEGPRAGSCCLSPGGRAELEGRD	AGS(0.589)CCLS(0.411)PGGRAELEGRDK	1	NaN	NaN	NaN	NaN	NaN	NaN	NaN	NaN	NaN	NaN	NaN	NaN	NaN	NaN	NaN	NaN	NaN	NaN	NaN	NaN	NaN	NaN	NaN	NaN	NaN	NaN	NaN	NaN	NaN	NaN	NaN	NaN	NaN	19.0439	19.3367	19.4058	19.1075	18.9526	19.418	19.6035	19.105	18.8771	18.8075	18.7285
MKL1;mkl1	MKL/myocardin-like protein 1	511	ILVKEEGPRAGSCCLSPGGRAELEGRDKDQM	AGSCCLS(1)PGGRAELEGRDK	1	18.2786	18.5357	18.3265	18.3368	18.0933	17.4636	18.1842	17.7831	18.0573	17.8479	17.6837	NaN	NaN	NaN	NaN	NaN	NaN	NaN	NaN	NaN	NaN	NaN	19.436	19.4866	19.6417	19.3394	19.2375	19.4948	19.2644	19.0958	18.8928	19.2149	18.9912	NaN	NaN	NaN	NaN	NaN	NaN	NaN	NaN	NaN	NaN	NaN
MKL1;mkl1	MKL/myocardin-like protein 1	333	SSSGAPGPCGLARQNSTSLTGKPGALPANLD	QNS(0.972)T(0.027)S(0.001)LTGKPGALPANLDDMK	1	NaN	NaN	NaN	NaN	NaN	NaN	NaN	NaN	NaN	NaN	NaN	19.2705	19.1486	19.3399	19.1569	19.5215	18.6494	18.7869	18.7722	18.9498	18.8847	18.6031	15.7807	16.1353	16.4137	16.1253	16.3418	15.9563	15.9238	15.7607	15.6688	16.0942	15.8274	NaN	NaN	NaN	NaN	NaN	NaN	NaN	NaN	NaN	NaN	NaN
MKL1;mkl1	Phosphatase and actin regulator;MKL/myocardin-like protein 1	6	__________MPPLKSPAAFHEQRRSLERAR;_________MIPPLKSPAAFHEQRRSLERAR	S(1)PAAFHEQR	1	NaN	NaN	NaN	NaN	NaN	NaN	NaN	NaN	NaN	NaN	NaN	17.498	17.4341	17.5765	17.2759	17.4397	18.1284	17.5351	17.3668	17.1009	17.3486	16.7297	16.1709	16.0772	16.1019	15.878	16.249	16.1514	15.8413	15.8919	15.6349	15.9891	15.8798	NaN	NaN	NaN	NaN	NaN	NaN	NaN	NaN	NaN	NaN	NaN
MKL1		157	LEARVSEPLLSATSASPTQQSQPKSASEKSQ	VSEPLLSAT(0.002)S(0.108)AS(0.878)PT(0.011)QQSQPK	1	NaN	NaN	NaN	NaN	NaN	NaN	NaN	NaN	NaN	NaN	NaN	NaN	NaN	NaN	NaN	NaN	NaN	NaN	NaN	NaN	NaN	NaN	NaN	NaN	NaN	NaN	NaN	NaN	NaN	NaN	NaN	NaN	NaN	14.9827	15.4617	15.3058	15.061	14.6927	15.173	14.7214	13.3903	14.1082	15.0311	14.4184
NHS	Nance-Horan syndrome protein	1125	VAQPESVDVITSQSDSPTRATDVSNQFKHQF	APSAGLEEVAQPESVDVIT(0.105)S(0.105)QS(0.105)DS(0.578)PT(0.105)RAT(0.004)DVSNQFK	1	NaN	NaN	NaN	NaN	NaN	NaN	NaN	NaN	NaN	NaN	NaN	NaN	NaN	NaN	NaN	NaN	NaN	NaN	NaN	NaN	NaN	NaN	NaN	NaN	NaN	NaN	NaN	NaN	NaN	NaN	NaN	NaN	NaN	NaN	NaN	NaN	NaN	NaN	NaN	NaN	NaN	NaN	NaN	NaN
NHS	Nance-Horan syndrome protein	972	DLPYLEESTLTTAALSPSKIRPHTANKSVSR	QKEENNTDLPY(0.001)LEES(0.018)T(0.018)LT(0.003)T(0.006)AALS(0.929)PS(0.025)K	1	NaN	NaN	NaN	NaN	NaN	NaN	NaN	NaN	NaN	NaN	NaN	NaN	NaN	NaN	NaN	NaN	NaN	NaN	NaN	NaN	NaN	NaN	17.191	17.6166	17.6009	17.3629	17.518	17.0523	17.4361	17.2992	17.3324	17.5434	17.4492	NaN	NaN	NaN	NaN	NaN	NaN	NaN	NaN	NaN	NaN	NaN
TNFAIP3	Tumor necrosis factor alpha-induced protein 3;A20p50;A20p37	645	EYRENKHFAAASGKVSPTASRFQNTIPCLGR	HFAAAS(0.017)GKVS(0.979)PT(0.004)ASR	1	16.2197	16.1663	16.2808	16.1976	16.156	16.1734	15.7238	15.5414	15.9895	15.6071	15.9386	17.3023	17.7286	17.7055	17.4878	17.6917	17.5991	17.2232	17.0184	17.4722	17.2197	17.0696	NaN	NaN	NaN	NaN	NaN	NaN	NaN	NaN	NaN	NaN	NaN	17.8665	18.2107	18.0121	18.0477	17.9618	17.9082	17.734	18.0251	17.6465	17.8823	17.811
TNFAIP3	Tumor necrosis factor alpha-induced protein 3;A20p50;A20p37	573	SCHQRSKSDPSRLVRSPSPHSCHRAGNDAPA	LVRS(1)PS(0.998)PHS(0.002)CHR	1;2	14.3142	14.9136	14.827	14.9386	14.6728	14.9797	14.8939	15.0656	14.4878	15.049	14.8435	15.6222	15.6535	15.5615	14.9177	15.2255	15.8269	15.2248	15.6847	14.9619	14.8969	15.2696	NaN	NaN	NaN	NaN	NaN	NaN	NaN	NaN	NaN	NaN	NaN	NaN	NaN	NaN	NaN	NaN	NaN	NaN	NaN	NaN	NaN	NaN
TNFAIP3	Tumor necrosis factor alpha-induced protein 3;A20p50;A20p37	575	HQRSKSDPSRLVRSPSPHSCHRAGNDAPAGC	LVRS(1)PS(0.999)PHS(0.001)CHR	1;2	NaN	NaN	NaN	NaN	NaN	NaN	NaN	NaN	NaN	NaN	NaN	15.6222	15.6535	15.5615	14.9177	15.2255	15.8269	15.2248	15.6847	14.9619	14.8969	15.2696	16.0136	16.8046	15.3539	15.468	16.5338	16.3436	15.5274	15.6082	15.0744	14.9436	15.5858	16.6227	17.3641	15.9234	16.3627	16.9207	16.6985	16.0684	16.3098	15.6787	15.675	15.8224
TNFAIP3	Tumor necrosis factor alpha-induced protein 3;A20p50;A20p37	563	SSSLSTSLPPSCHQRSKSDPSRLVRSPSPHS	S(0.631)KS(0.364)DPS(0.006)R	1	16.2376	16.6465	16.4707	16.6531	16.4534	16.1109	16.1502	16.3016	16.2594	16.4692	16.2369	NaN	NaN	NaN	NaN	NaN	NaN	NaN	NaN	NaN	NaN	NaN	NaN	NaN	NaN	NaN	NaN	NaN	NaN	NaN	NaN	NaN	NaN	20.3958	20.5971	20.7695	20.786	20.7013	20.5663	20.5771	20.771	20.2533	20.5406	20.8369
TNFAIP3	Tumor necrosis factor alpha-induced protein 3;A20p50;A20p37	565	SLSTSLPPSCHQRSKSDPSRLVRSPSPHSCH	S(0.083)KS(0.916)DPS(0.001)R	1	NaN	NaN	NaN	NaN	NaN	NaN	NaN	NaN	NaN	NaN	NaN	20.1992	20.5686	20.772	20.8628	20.694	20.0479	20.469	20.6062	20.5443	20.4504	20.6043	16.7776	17.2374	17.2148	17.2143	17.0006	16.6477	17.102	17.1279	16.3873	17.1328	17.0169	20.1352	20.2892	20.5054	20.512	20.4341	20.2905	20.2871	20.5211	19.9866	20.2252	20.5877
ZNF804B	Zinc finger protein 804B	794	MYYLNKSKRNQESLGSPHICDLGKVRPMKCN	NQES(0.004)LGS(0.996)PHICDLGK	1	17.058	17.099	17.1786	17.0996	17.1927	16.9037	17.3063	17.2894	17.4348	17.282	17.4755	18.7607	18.9078	18.6664	18.6934	18.8882	18.8533	18.8004	18.922	19.1423	18.874	18.9209	NaN	NaN	NaN	NaN	NaN	NaN	NaN	NaN	NaN	NaN	NaN	NaN	NaN	NaN	NaN	NaN	NaN	NaN	NaN	NaN	NaN	NaN
CTNNBL1	Beta-catenin-like protein 1	550	RHIIKEYAENIGDGRSPEFRENEQKRILGLL	EYAENIGDGRS(1)PEFRENEQK	1	22.8846	22.9078	22.9628	22.8921	22.9246	22.2231	23.0427	22.8593	22.9296	22.9469	22.9057	23.2812	23.4178	23.348	23.4927	23.3843	22.7658	23.5479	23.2996	23.3875	23.482	23.3313	21.6109	21.6191	21.6809	21.5282	21.4846	21.6511	21.621	21.4475	21.3517	21.4539	21.5336	22.9217	22.8584	22.969	22.8595	22.8673	22.8168	22.7461	22.735	22.5926	22.588	22.7441
LENG8	Leukocyte receptor cluster member 8	249	RGTPGAGGAGRARGNSFTKFGNRNVFMKDNS	ARGNS(1)FTK	1	NaN	NaN	NaN	NaN	NaN	NaN	NaN	NaN	NaN	NaN	NaN	NaN	NaN	NaN	NaN	NaN	NaN	NaN	NaN	NaN	NaN	NaN	NaN	NaN	NaN	NaN	NaN	NaN	NaN	NaN	NaN	NaN	NaN	NaN	NaN	NaN	NaN	NaN	NaN	NaN	NaN	NaN	NaN	NaN
LENG8	Leukocyte receptor cluster member 8	203	SREPLPGLTREPVAESPKKKRWEAASSLHPP	EPVAES(1)PK	1	22.784	22.816	22.9704	23.0829	22.8619	22.4687	23.0475	23.045	23.1905	23.0966	23.1237	22.6349	22.8749	22.8483	22.971	23.0143	22.3754	22.9213	22.8365	23.0085	22.8086	22.8898	21.7626	21.8679	22.1058	21.9789	21.7477	21.8466	21.9433	22.0064	21.8863	21.9403	21.9035	19.342	19.4913	19.541	19.4508	19.2689	19.33	19.4549	19.5052	19.2805	19.6077	19.3707
PIBF1	Progesterone-induced-blocking factor 1	592	SVHLARRVLQLEKQNSLILKDLEHRKDQVTQ	QNS(1)LILK	1	NaN	NaN	NaN	NaN	NaN	NaN	NaN	NaN	NaN	NaN	NaN	NaN	NaN	NaN	NaN	NaN	NaN	NaN	NaN	NaN	NaN	NaN	18.09	18.2406	18.3928	18.2583	18.3093	18.3697	18.3448	18.2637	18.2998	18.5988	18.1742	NaN	NaN	NaN	NaN	NaN	NaN	NaN	NaN	NaN	NaN	NaN
ZNF516	Zinc finger protein 516	851	TRTQVPGGMPGSKSGSSPLGVVTKAASMPKN	S(0.069)GS(0.658)S(0.273)PLGVVTK	1	NaN	NaN	NaN	NaN	NaN	NaN	NaN	NaN	NaN	NaN	NaN	19.827	20.1495	20.0819	20.0159	19.928	20.0807	20.0974	19.7714	19.9909	19.8338	19.8373	NaN	NaN	NaN	NaN	NaN	NaN	NaN	NaN	NaN	NaN	NaN	NaN	NaN	NaN	NaN	NaN	NaN	NaN	NaN	NaN	NaN	NaN
ZNF516	Zinc finger protein 516	852	RTQVPGGMPGSKSGSSPLGVVTKAASMPKNK	SGSS(1)PLGVVTK	1	18.4418	18.8463	18.7473	18.896	18.5844	18.8116	18.7794	18.361	18.9724	18.7219	18.6207	18.849	19.316	19.23	19.1312	18.8999	19.21	19.2093	19.0494	19.0787	18.9323	18.9232	19.377	19.4483	19.3027	19.162	19.1269	19.4805	19.298	19.0784	18.9916	19.3196	19.0941	20.7694	21.0247	20.9312	20.8566	20.5728	20.9572	20.8636	20.7442	20.6508	20.7993	20.681
NR2C1	Nuclear receptor subfamily 2 group C member 1	215	CAASTEKIYIRKDLRSPLTATPTFVTDSEST	DLRS(1)PLTATPTFVTDSESTR	1	17.8998	18.257	17.8677	17.7323	17.7363	18.268	18.0179	17.7267	17.9671	17.6323	17.8474	19.039	19.7608	19.6804	19.609	19.8036	19.9094	19.4023	19.3173	19.7062	19.3774	19.4938	16.9031	17.0983	16.9874	17.1816	17.3352	17.6025	17.4648	16.7285	16.9447	17.3028	17.1564	19.5528	19.6208	19.2332	19.5368	18.9639	19.6939	19.449	19.1849	19.3028	19.6068	19.0731
NR2C1	Nuclear receptor subfamily 2 group C member 1	64	HDGSTPSKVILARQDSTPGKVFLTTPDAAGV	QDS(0.984)T(0.016)PGK	1	NaN	NaN	NaN	NaN	NaN	NaN	NaN	NaN	NaN	NaN	NaN	21.1147	20.8029	21.0383	20.8817	21.0305	20.1713	20.7082	20.5882	20.5839	20.6858	20.4798	19.4933	19.7745	19.8146	19.5785	19.5981	19.5357	19.5107	19.2372	19.2178	19.626	19.1754	21.727	21.7143	22.0233	21.6806	21.7764	21.6744	21.7196	21.4954	21.3418	21.6587	21.4174
NR2C1	Nuclear receptor subfamily 2 group C member 1	203	KPIEVSREKSSNCAASTEKIYIRKDLRSPLT	SSNCAAS(0.997)T(0.002)EK	1	NaN	NaN	NaN	NaN	NaN	NaN	NaN	NaN	NaN	NaN	NaN	16.0571	16.5011	15.9919	15.9144	15.9374	16.2656	16.451	15.7618	16.1097	15.9955	15.7138	18.1301	17.9098	17.4796	17.3321	17.2123	18.213	18.2587	17.0886	17.4965	17.8076	17.2017	16.9257	16.7865	16.353	16.3571	15.9813	17.3103	16.9979	15.9799	16.427	16.5737	15.9976
MYC	Myc proto-oncogene protein	358	SVRVLRQISNNRKCTSPRSSDTEENVKRRTH	CT(0.004)S(0.996)PRS(0.94)S(0.059)DT(0.001)EENVK	1;2	NaN	NaN	NaN	NaN	NaN	NaN	NaN	NaN	NaN	NaN	NaN	NaN	NaN	NaN	NaN	NaN	NaN	NaN	NaN	NaN	NaN	NaN	20.2396	20.6054	20.601	20.6312	20.4929	20.2215	20.0925	20.3953	20.4519	20.2239	20.4289	NaN	NaN	NaN	NaN	NaN	NaN	NaN	NaN	NaN	NaN	NaN
MYC	Myc proto-oncogene protein	361	VLRQISNNRKCTSPRSSDTEENVKRRTHNVL	CT(0.053)S(0.947)PRS(0.947)S(0.053)DTEENVK	1;2	16.9801	17.3079	17.3067	17.2875	17.5234	16.7961	16.7968	16.8068	17.489	17.0222	17.0272	NaN	NaN	NaN	NaN	NaN	NaN	NaN	NaN	NaN	NaN	NaN	NaN	NaN	NaN	NaN	NaN	NaN	NaN	NaN	NaN	NaN	NaN	18.1128	18.7201	18.9798	18.7636	18.8203	18.1457	18.0166	18.3314	18.3957	17.8833	18.0964
MYC	Myc proto-oncogene protein	362	LRQISNNRKCTSPRSSDTEENVKRRTHNVLE	CTSPRS(0.02)S(0.98)DT(0.001)EENVK	1;2	18.2338	18.4606	18.8497	18.8757	18.9603	18.1307	18.2999	18.418	18.8529	18.2448	18.3889	NaN	NaN	NaN	NaN	NaN	NaN	NaN	NaN	NaN	NaN	NaN	17.6937	18.0289	18.3713	18.2353	18.1282	17.6208	17.3338	17.901	17.4906	17.4133	17.593	NaN	NaN	NaN	NaN	NaN	NaN	NaN	NaN	NaN	NaN	NaN
MYC	Myc proto-oncogene protein	175	SEKLASYQAARKDSGSPNPARGHSVCSTSSL	DS(0.03)GS(0.97)PNPAR	1	13.9027	13.9237	14.1459	14.1141	13.849	13.2714	13.8473	13.1635	13.6901	13.1383	14.1168	NaN	NaN	NaN	NaN	NaN	NaN	NaN	NaN	NaN	NaN	NaN	15.9039	15.9831	15.9599	15.7606	15.8708	15.7352	15.9102	16.1224	15.9298	15.2962	16.0397	NaN	NaN	NaN	NaN	NaN	NaN	NaN	NaN	NaN	NaN	NaN
MYC	Myc proto-oncogene protein	76	EDIWKKFELLPTPPLSPSRRSGLCSPSYVAV	KFELLPTPPLS(0.999)PS(0.001)R	1;2	20.7403	21.1101	21.2289	21.2722	21.2457	21.0188	20.8676	20.9329	21.3611	20.924	20.9517	21.6805	22.2303	22.4782	22.3631	22.5073	21.8105	21.7567	21.9054	22.3446	21.7633	22.0789	20.5818	21.0374	21.5021	21.0949	21.0165	20.5024	20.6407	20.8368	20.8164	20.6413	20.649	22.2671	22.8809	23.2314	22.9355	22.9052	22.3508	22.3653	22.5105	22.6052	22.3203	22.4221
MYC	Myc proto-oncogene protein	78	IWKKFELLPTPPLSPSRRSGLCSPSYVAVTP	KFELLPTPPLS(0.123)PS(0.877)R	1	NaN	NaN	NaN	NaN	NaN	NaN	NaN	NaN	NaN	NaN	NaN	NaN	NaN	NaN	NaN	NaN	NaN	NaN	NaN	NaN	NaN	NaN	18.3912	18.7709	19.1632	18.9249	18.8066	18.4879	18.6112	18.6112	18.763	18.9349	18.6918	NaN	NaN	NaN	NaN	NaN	NaN	NaN	NaN	NaN	NaN	NaN
MYC	Myc proto-oncogene protein	85	LPTPPLSPSRRSGLCSPSYVAVTPFSLRGDN	S(0.017)GLCS(0.96)PS(0.012)Y(0.01)VAVTPFSLR	1	NaN	NaN	NaN	NaN	NaN	NaN	NaN	NaN	NaN	NaN	NaN	18.0262	17.8136	17.6234	17.9471	18.0702	18.3703	17.9943	17.8187	18.2657	18.023	17.5414	NaN	NaN	NaN	NaN	NaN	NaN	NaN	NaN	NaN	NaN	NaN	NaN	NaN	NaN	NaN	NaN	NaN	NaN	NaN	NaN	NaN	NaN
PIAS2	E3 SUMO-protein ligase PIAS2	208	DPPAKRKCIFMSETQSSPTKGVLMYQPSSVR	CIFMSET(0.001)QS(0.862)S(0.137)PTK	1	NaN	NaN	NaN	NaN	NaN	NaN	NaN	NaN	NaN	NaN	NaN	NaN	NaN	NaN	NaN	NaN	NaN	NaN	NaN	NaN	NaN	NaN	18.3687	18.6322	18.751	18.6943	18.4895	18.5289	18.5451	18.6057	18.4369	18.619	18.5734	17.9593	18.0523	18.001	18.0006	18.1696	17.9738	18.0778	18.0762	17.9323	18.0223	17.9635
PIAS2	E3 SUMO-protein ligase PIAS2	209	PPAKRKCIFMSETQSSPTKGVLMYQPSSVRV	CIFMSETQS(0.012)S(0.987)PT(0.001)K	1	NaN	NaN	NaN	NaN	NaN	NaN	NaN	NaN	NaN	NaN	NaN	19.8976	20.1701	20.1011	20.1347	20.1371	20.2375	20.088	19.881	20.111	19.9402	20.0351	NaN	NaN	NaN	NaN	NaN	NaN	NaN	NaN	NaN	NaN	NaN	20.4275	20.4991	20.469	20.4172	20.3972	20.4129	20.5161	20.3927	20.1639	20.2705	20.3281
SPTBN1	Spectrin beta chain, non-erythrocytic 1	2342	RAQTLPTSVVTITSESSPGKREKDKEKDKEK	AQTLPTSVVTITS(0.014)ES(0.722)S(0.263)PGKREK	1	17.3297	17.8379	17.6959	17.7768	17.8303	18.3494	17.4242	17.3433	17.728	17.6637	17.4397	20.0232	20.5749	20.5278	20.6573	20.3868	20.9308	20.2715	20.2414	20.4886	20.1586	20.2653	19.6589	19.7585	20.0684	19.7945	19.5387	19.6492	20.0691	19.7826	19.5268	20.0769	19.5705	NaN	NaN	NaN	NaN	NaN	NaN	NaN	NaN	NaN	NaN	NaN
SPTBN1	Spectrin beta chain, non-erythrocytic 1	2343	AQTLPTSVVTITSESSPGKREKDKEKDKEKR	AQTLPTSVVTITSES(0.02)S(0.98)PGK	1	20.0272	20.5932	20.5213	20.4672	20.4185	20.1799	20.3407	20.1438	20.5192	20.1677	20.1785	21.8054	22.3751	22.3852	22.3114	22.1368	21.3074	22.1812	21.9176	22.2079	21.945	21.9794	18.8568	19.2056	19.0643	19.0947	18.9247	18.9682	18.9956	18.9371	18.8242	19.4157	18.9885	22.3699	22.6355	22.7199	22.6826	22.4339	22.5215	22.4051	22.4692	22.3703	22.0392	22.1993
SPTBN1	Spectrin beta chain, non-erythrocytic 1	2318	AISSAISSDKHEVSASTQSTPASSRAQTLPT	HEVSAS(0.995)T(0.004)QS(1)T(1)PASSR	1;2;3	16.7439	16.5676	16.422	16.209	16.6345	16.0611	16.5335	16.8851	16.9636	16.9358	16.5775	NaN	NaN	NaN	NaN	NaN	NaN	NaN	NaN	NaN	NaN	NaN	NaN	NaN	NaN	NaN	NaN	NaN	NaN	NaN	NaN	NaN	NaN	NaN	NaN	NaN	NaN	NaN	NaN	NaN	NaN	NaN	NaN	NaN
SPTBN1	Spectrin beta chain, non-erythrocytic 1	2321	SAISSDKHEVSASTQSTPASSRAQTLPTSVV	HEVSAS(0.995)T(0.004)QS(1)T(1)PASSR	1;2;3	15.6369	16.5291	16.6982	16.7402	16.3484	15.8532	16.2331	16.4312	16.1698	16.3436	16.4495	NaN	NaN	NaN	NaN	NaN	NaN	NaN	NaN	NaN	NaN	NaN	NaN	NaN	NaN	NaN	NaN	NaN	NaN	NaN	NaN	NaN	NaN	18.995	19.4946	19.5493	19.4251	19.2163	19.5378	19.189	19.7514	19.0761	18.7828	19.3869
SPTBN1	Spectrin beta chain, non-erythrocytic 1	2166	EMVNGATEQRTSSKESSPIPSPTSDRKAKTA	ES(0.808)S(0.892)PIPS(0.573)PT(0.378)S(0.348)DRK	1;2;3	19.2005	19.1768	19.2443	19.2671	18.8416	18.6563	19.6981	19.3634	19.5698	19.4455	19.3734	NaN	NaN	NaN	NaN	NaN	NaN	NaN	NaN	NaN	NaN	NaN	NaN	NaN	NaN	NaN	NaN	NaN	NaN	NaN	NaN	NaN	NaN	NaN	NaN	NaN	NaN	NaN	NaN	NaN	NaN	NaN	NaN	NaN
SPTBN1	Spectrin beta chain, non-erythrocytic 1	2167	MVNGATEQRTSSKESSPIPSPTSDRKAKTAL	ES(0.002)S(0.998)PIPSPTSDRK	1;2;3	NaN	NaN	NaN	NaN	NaN	NaN	NaN	NaN	NaN	NaN	NaN	21.8923	22.2597	22.1733	22.2905	21.9351	21.1428	22.3998	22.3163	22.4274	22.2226	22.3494	20.2542	20.259	20.3146	20.2762	20.0806	20.2416	19.8473	20.5374	20.165	19.6755	20.4055	22.0184	22.1725	22.1292	22.2114	22.223	22.2559	21.6869	22.4739	22.2449	21.5715	22.2382
SPTBN1	Spectrin beta chain, non-erythrocytic 1	2171	ATEQRTSSKESSPIPSPTSDRKAKTALPAQS	ES(0.5)S(0.5)PIPS(1)PT(0.62)S(0.38)DRK	1;2;3	21.1941	21.2963	21.4538	21.4167	21.2796	21.1487	21.3673	21.2895	21.3376	21.5048	21.3681	20.5626	20.3724	20.6758	20.5596	20.6923	20.3051	20.687	20.6738	20.5052	20.6999	20.6661	20.5374	20.5782	20.8205	20.7063	20.6457	20.5587	20.616	20.7666	20.4717	20.8948	20.7493	20.2731	20.412	20.6786	20.6781	20.6667	20.4068	20.5496	20.6548	20.4776	20.5934	20.6447
SPTBN1	Spectrin beta chain, non-erythrocytic 1	2130	AESQQQWDTSKGEQVSQNGLPAEQGSPRMAE	GEQVS(1)QNGLPAEQGS(1)PR	1;2	17.4242	17.2984	17.0992	17.3228	17.5508	20.7067	17.6023	17.8321	17.5524	17.4926	17.3508	20.2697	20.5114	20.8157	20.7872	21.0337	21.1193	21.119	20.9938	20.8351	20.5373	20.9255	20.1631	20.3084	20.376	20.4018	20.3319	20.2699	20.1732	20.5909	20.2689	20.1758	20.4386	20.3114	20.6234	20.651	20.7392	20.4315	20.3841	20.753	20.8824	20.7665	20.2893	20.6309
SPTBN1	Spectrin beta chain, non-erythrocytic 1	2140	KGEQVSQNGLPAEQGSPRMAETVDTSEMVNG	GEQVSQNGLPAEQGS(1)PR	1;2	20.4043	20.7957	20.6323	20.7188	20.6673	19.9648	20.7135	20.4463	20.6712	20.501	20.4769	22.1834	22.5958	22.5467	22.502	22.1651	21.7615	22.3334	22.1367	22.2532	22.059	22.3072	20.339	20.5882	20.3426	20.2218	20.142	20.426	20.3306	20.2835	20.0658	19.9518	20.0682	22.9136	22.9055	22.9696	22.7828	22.5038	23.1166	22.8369	22.4603	22.4764	22.3862	22.4244
SPTBN1	Spectrin beta chain, non-erythrocytic 1	825	LPQEHAESPDVRGRLSGIEERYKEVAELTRL	GRLS(1)GIEER	1	NaN	NaN	NaN	NaN	NaN	NaN	NaN	NaN	NaN	NaN	NaN	NaN	NaN	NaN	NaN	NaN	NaN	NaN	NaN	NaN	NaN	NaN	17.2469	17.1599	17.2126	17.2964	17.3538	17.5085	17.3123	17.6068	17.5262	17.3623	17.5625	16.3827	16.3884	16.4378	16.343	16.2526	16.419	16.2444	16.3602	16.0222	16.3751	16.2384
SPTBN1	Spectrin beta chain, non-erythrocytic 1	2162	VDTSEMVNGATEQRTSSKESSPIPSPTSDRK	MAETVDTSEMVNGAT(0.118)EQRT(0.822)S(0.822)S(0.239)K	1;2	NaN	NaN	NaN	NaN	NaN	NaN	NaN	NaN	NaN	NaN	NaN	NaN	NaN	NaN	NaN	NaN	NaN	NaN	NaN	NaN	NaN	NaN	NaN	NaN	NaN	NaN	NaN	NaN	NaN	NaN	NaN	NaN	NaN	NaN	NaN	NaN	NaN	NaN	NaN	NaN	NaN	NaN	NaN	NaN
SPTBN1	Spectrin beta chain, non-erythrocytic 1	2163	DTSEMVNGATEQRTSSKESSPIPSPTSDRKA	MAETVDTSEMVNGATEQRTS(0.016)S(0.984)K	1;2;3	19.0317	18.8157	18.9668	19.0993	19.0609	17.7571	19.0523	19.0886	19.4287	19.1349	19.0662	21.0815	20.9802	21.1459	21.0914	21.121	20.0004	21.3179	21.233	21.4441	21.1869	21.2406	NaN	NaN	NaN	NaN	NaN	NaN	NaN	NaN	NaN	NaN	NaN	22.2345	21.9132	22.2269	22.0311	22.085	22.1196	21.6399	22.2439	22.1281	21.5714	22.1594
SPTBN1	Spectrin beta chain, non-erythrocytic 1	2360	GKREKDKEKDKEKRFSLFGKKK_________	RFS(1)LFGK	1	17.4479	17.1305	17.4201	17.1941	17.1288	17.0806	17.5214	17.4418	17.6366	17.5366	17.038	19.1613	18.4644	18.8577	18.5543	18.7245	18.5453	18.8032	19.6794	18.9136	19.8383	18.2316	18.4333	18.0993	18.2957	18.0126	17.8856	18.1983	18.4382	18.2575	18.0994	18.3944	18.2398	17.8649	17.5699	17.6537	17.4693	17.5051	17.7083	17.7765	17.9856	17.3839	18.2947	17.3544
SPTBN1	Spectrin beta chain, non-erythrocytic 1	2104	VRRQQEEEERKRRPPSPEPSTKVSEEAESQQ	RRPPS(1)PEPSTK	1	22.5715	22.7098	22.7517	22.7348	22.6912	23.5491	22.7666	22.6859	22.879	22.7523	22.7508	23.188	23.3542	23.3342	23.4035	23.3956	23.9162	23.4109	23.2907	23.4676	23.4233	23.332	20.9963	21.056	21.0086	21.062	20.9044	21.1357	21.1209	21.1926	20.9314	21.1834	21.0441	23.0056	23.0775	23.0766	22.9929	23.0591	23.216	23.0858	23.1491	23.0166	23.0912	23.0949
SPTBN1	Spectrin beta chain, non-erythrocytic 1	2108	QEEEERKRRPPSPEPSTKVSEEAESQQQWDT	RRPPS(0.088)PEPS(0.909)T(0.003)K	1	NaN	NaN	NaN	NaN	NaN	NaN	NaN	NaN	NaN	NaN	NaN	NaN	NaN	NaN	NaN	NaN	NaN	NaN	NaN	NaN	NaN	NaN	21.8465	21.899	22.0568	21.8353	21.9239	21.9108	21.8486	21.9788	21.8216	21.8995	21.9713	18.6518	18.752	18.7119	18.6892	18.7585	18.8379	18.7304	18.8195	18.6431	18.7804	18.7484
SPTBN1	Spectrin beta chain, non-erythrocytic 1	2124	TKVSEEAESQQQWDTSKGEQVSQNGLPAEQG	VSEEAESQQQWDT(0.098)S(0.902)K	1	NaN	NaN	NaN	NaN	NaN	NaN	NaN	NaN	NaN	NaN	NaN	17.7745	17.8789	17.4539	17.6841	17.4169	17.8714	17.9614	17.8961	17.926	17.9221	17.6806	NaN	NaN	NaN	NaN	NaN	NaN	NaN	NaN	NaN	NaN	NaN	NaN	NaN	NaN	NaN	NaN	NaN	NaN	NaN	NaN	NaN	NaN
SUCO	SUN domain-containing ossification factor	540	EVDPNDLYIVEPLKFSPEKKKKRCKYKIEKI	EVDPNDLYIVEPLKFS(1)PEK	1	NaN	NaN	NaN	NaN	NaN	NaN	NaN	NaN	NaN	NaN	NaN	16.4088	17.049	16.4791	16.514	16.7466	16.9648	16.8198	16.4677	16.7589	16.4374	16.4222	NaN	NaN	NaN	NaN	NaN	NaN	NaN	NaN	NaN	NaN	NaN	NaN	NaN	NaN	NaN	NaN	NaN	NaN	NaN	NaN	NaN	NaN
SUCO	SUN domain-containing ossification factor	518	MNLKRRTSFPLMRSKSLQLTGKEVDPNDLYI	S(1)LQLTGK	1	NaN	NaN	NaN	NaN	NaN	NaN	NaN	NaN	NaN	NaN	NaN	NaN	NaN	NaN	NaN	NaN	NaN	NaN	NaN	NaN	NaN	NaN	19.0581	19.7597	19.8923	19.5056	19.0544	19.0844	19.4894	19.3768	19.384	19.4372	19.4577	18.4294	19.0815	19.1239	18.6527	18.4212	18.3361	19.1163	18.7436	18.7184	19.6409	18.7927
BORA	Protein aurora borealis	212	LSQCHSSKCTNINSDSPVGKKLTIHSEKSDA	CTNINSDS(1)PVGK	1	18.7017	19.0697	18.9219	19.0013	18.9755	18.9748	18.9419	18.8419	18.9291	18.8317	18.6965	19.8872	20.2233	20.292	20.2203	20.1987	20.7581	20.218	19.9668	20.2337	20.0303	19.9785	19.3233	19.4881	19.6183	19.5117	19.3695	19.3905	19.3869	19.3433	19.2437	19.3263	19.2001	19.8938	20.2128	20.3556	20.1713	20.0558	20.138	20.0904	19.9197	19.8185	19.9459	19.9699
BORA	Protein aurora borealis	374	IGETPLSEQRKFTVHSPDASSGTNSNGITNP	FT(0.002)VHS(0.998)PDASSGTNSNGITNPCIR	1	NaN	NaN	NaN	NaN	NaN	NaN	NaN	NaN	NaN	NaN	NaN	NaN	NaN	NaN	NaN	NaN	NaN	NaN	NaN	NaN	NaN	NaN	15.4163	15.8785	15.5809	15.8145	15.385	15.5977	15.354	15.2964	15.1077	15.0611	15.2408	16.4565	16.8646	16.4811	16.8179	16.7829	16.6913	16.3652	16.111	15.7208	15.8482	15.8974
BORA	Protein aurora borealis	400	GITNPCIRSPYIDGCSPIKNWSPMRLQMYSG	SPYIDGCS(1)PIK	1	NaN	NaN	NaN	NaN	NaN	NaN	NaN	NaN	NaN	NaN	NaN	NaN	NaN	NaN	NaN	NaN	NaN	NaN	NaN	NaN	NaN	NaN	NaN	NaN	NaN	NaN	NaN	NaN	NaN	NaN	NaN	NaN	NaN	20.3498	20.5704	20.7404	20.8036	20.5814	20.3546	20.5194	20.24	20.0926	19.9516	20.2808
SMAP2	Stromal membrane-associated protein 2	211	SKTSNTLEKDLDLLASVPSPSSSGSRKVVGS	DLDLLAS(0.852)VPS(0.081)PS(0.018)S(0.019)S(0.025)GS(0.005)RK	1	18.0623	18.8299	18.8412	18.8533	18.5058	18.2558	18.6635	18.7016	18.6473	18.245	18.5626	NaN	NaN	NaN	NaN	NaN	NaN	NaN	NaN	NaN	NaN	NaN	NaN	NaN	NaN	NaN	NaN	NaN	NaN	NaN	NaN	NaN	NaN	17.3464	17.7313	17.3952	17.2675	17.3268	17.6616	17.4808	17.2146	17.2374	17.305	17.3173
SMAP2	Stromal membrane-associated protein 2	214	SNTLEKDLDLLASVPSPSSSGSRKVVGSMPT	DLDLLASVPS(0.999)PSSSGSR	1	19.8855	20.3811	20.0425	20.2154	20.1351	21.0723	20.1296	20.0103	20.277	20.1118	20.176	21.9828	22.6674	22.4227	22.4569	22.3154	22.5481	22.3333	21.982	22.4748	22.191	22.4613	21.342	21.6997	21.4586	21.3592	21.1751	21.5826	21.4533	21.2184	21.2534	21.4834	21.2005	19.611	19.9401	19.6515	19.6339	19.4899	19.9207	19.7888	19.6082	19.5316	19.5057	19.5037
SMAP2	Stromal membrane-associated protein 2	235	SRKVVGSMPTAGSAGSVPENLNLFPEPGSKS	VVGSMPTAGSAGS(1)VPENLNLFPEPGSK	1	18.0498	17.916	17.8376	18.0972	17.9733	17.9735	18.3649	18.1142	18.3039	18.2403	18.282	19.532	19.3564	19.561	19.7274	19.6271	19.1834	19.6735	19.6884	20.0358	19.6766	19.9804	17.0298	17.0656	17.1627	17.1412	16.8101	17.0992	17.3042	17.3115	16.9763	17.221	17.2933	19.7445	19.6505	19.6622	19.649	19.5554	19.7204	19.8809	19.8005	19.5371	19.6251	19.8567
TEX2	Testis-expressed sequence 2 protein	295	VPEMEAKIEDTKRRLSEVIYEPFQLLSKIIG	RRLS(1)EVIYEPFQLLSK	1	NaN	NaN	NaN	NaN	NaN	NaN	NaN	NaN	NaN	NaN	NaN	NaN	NaN	NaN	NaN	NaN	NaN	NaN	NaN	NaN	NaN	NaN	15.797	16.0747	16.4935	16.3861	15.6433	15.8766	16.4194	16.1147	16.1595	16.6796	16.3849	16.4066	16.604	17.1839	16.9273	16.3951	16.5084	16.9752	16.9444	16.9589	17.1704	17.0128
TEX2	Testis-expressed sequence 2 protein	222	PARHRHLMKTLVKSLSTDTSRQESDTVSYKP	S(0.03)LS(0.958)T(0.012)DTSRQESDTVSYKPPDSK	1	NaN	NaN	NaN	NaN	NaN	NaN	NaN	NaN	NaN	NaN	NaN	NaN	NaN	NaN	NaN	NaN	NaN	NaN	NaN	NaN	NaN	NaN	NaN	NaN	NaN	NaN	NaN	NaN	NaN	NaN	NaN	NaN	NaN	NaN	NaN	NaN	NaN	NaN	NaN	NaN	NaN	NaN	NaN	NaN
TEX2	Testis-expressed sequence 2 protein	162	SPSVSSLSEQKTSSSSPLSSPSKSPILSSSA	TSSS(0.026)S(0.969)PLS(0.003)S(0.001)PSK	1;2	17.055	17.4532	16.8662	16.9185	17.071	16.7704	17.1545	17.4292	17.3852	17.2267	17.0035	NaN	NaN	NaN	NaN	NaN	NaN	NaN	NaN	NaN	NaN	NaN	16.952	17.6256	17.8005	17.1159	17.2641	17.2599	17.622	17.4153	17.36	17.0037	17.2541	18.4806	18.8081	19.2079	18.4608	18.5141	18.8196	18.957	18.8897	18.9856	18.3313	18.8127
KRBA1	Protein KRBA1	210	SLGTSRLTRADLGPGSPPWAVKTEAVSGDCP	ADLGPGS(1)PPWAVK	1	NaN	NaN	NaN	NaN	NaN	NaN	NaN	NaN	NaN	NaN	NaN	19.6574	19.6967	19.705	19.9333	19.7232	20.2014	19.9237	19.6931	19.987	19.8824	20.1706	18.7719	18.6062	18.7038	18.6688	18.5916	18.7814	18.7338	18.6894	18.5624	18.9108	18.8628	19.7933	19.8864	19.6835	19.7684	19.8157	19.9013	19.8669	20.0309	19.6947	19.7845	19.8868
KRBA1	Protein KRBA1	139	EGPGALGGEPSPPTHSPSRRKSHRGQERGTS	EGPGALGGEPSPPTHS(0.807)PS(0.193)R	1;2	NaN	NaN	NaN	NaN	NaN	NaN	NaN	NaN	NaN	NaN	NaN	18.2219	18.276	18.7633	18.4953	18.3178	19.1945	18.2815	18.5844	18.6517	18.4465	18.5097	16.6351	16.9084	16.6781	16.5066	16.6785	17.1512	16.6047	16.8298	16.7176	16.8374	16.7179	19.2064	19.2827	19.448	19.5336	19.2674	19.6216	19.3692	19.7711	19.3466	19.2513	19.4386
KRBA1	Protein KRBA1	450	FGSPVGNQGQHPGKGSPPGSSPLQGLENCLK	GS(1)PPGSSPLQGLENCLK	1	NaN	NaN	NaN	NaN	NaN	NaN	NaN	NaN	NaN	NaN	NaN	NaN	NaN	NaN	NaN	NaN	NaN	NaN	NaN	NaN	NaN	NaN	17.8086	17.9883	18.0628	17.8828	17.8338	18.112	17.7947	18.3866	17.9496	17.3517	18.2861	NaN	NaN	NaN	NaN	NaN	NaN	NaN	NaN	NaN	NaN	NaN
KRBA1	Protein KRBA1	312	SPPGPASCQPGRQPLSPSATGDTRGVPQPSW	MENSWVQSPPGPAS(0.017)CQPGRQPLS(0.802)PS(0.166)AT(0.012)GDT(0.002)R	1	15.7985	15.4528	15.7601	15.5886	15.6499	15.6523	15.7744	16.1311	16.1288	15.6892	16.1451	16.164	15.6636	16.107	16.0535	16.0642	16.2474	16.4978	16.3483	16.5623	16.2416	16.5104	NaN	NaN	NaN	NaN	NaN	NaN	NaN	NaN	NaN	NaN	NaN	16.6544	16.2082	16.4298	16.4595	16.5443	17.0558	16.9374	17.1887	16.7893	16.9249	17.0959
FAM156A;FAM156B	Protein FAM156A/FAM156B	114	RDHMAPYAVGREARISPLGDRSQNRFRC___	EARIS(1)PLGDR	1	17.3905	17.4561	17.4588	17.2868	17.2224	17.411	17.4687	17.1203	17.4219	17.5036	17.3406	18.3293	18.2791	18.5017	18.4598	18.3592	18.5666	18.6061	17.8671	18.1987	18.4335	18.0638	18.0124	17.9628	17.9532	17.8744	17.7454	18.0365	18.0831	17.7846	17.8398	17.934	17.841	17.8233	17.4439	17.5321	17.2716	17.205	17.7649	17.7022	17.3554	16.8243	17.3803	17.3095
FAM156A;FAM156B	Protein FAM156A/FAM156B	11	_____MDPLQKRNPASPSKSSPMTAAETSQE	RNPAS(0.999)PS(0.001)K	1	21.0839	21.357	21.279	21.4193	21.2747	21.0248	21.3273	21.1555	21.5053	21.5016	21.3987	21.2801	21.4553	21.4295	21.4192	21.494	21.1356	21.5295	21.3676	21.6021	21.7333	21.4913	18.2616	18.1833	18.2118	18.1103	17.9063	18.1561	18.2591	18.0645	18.0564	18.1819	18.2045	19.4786	19.5484	19.514	19.4933	19.4308	19.5519	19.4942	19.4672	19.3602	19.675	19.6066
ITSN2	Intersectin-2	220	LMMGGFGGASIQKAQSLIDLGSSSSTSSTAS	AQS(1)LIDLGSSSSTSSTASLSGNSPK	1	NaN	NaN	NaN	NaN	NaN	NaN	NaN	NaN	NaN	NaN	NaN	NaN	NaN	NaN	NaN	NaN	NaN	NaN	NaN	NaN	NaN	NaN	NaN	NaN	NaN	NaN	NaN	NaN	NaN	NaN	NaN	NaN	NaN	16.9485	16.5671	17.2812	17.175	16.5195	17.6696	17.5327	16.8851	17.2813	17.329	17.3221
ITSN2	Intersectin-2	120	LPVVLPPIMKQPPMFSPLISARFGMGSMPNL	QPPMFS(1)PLISAR	1	18.0947	18.4457	18.3994	18.5841	18.5505	18.4908	18.145	18.1147	18.9616	18.1651	18.6378	NaN	NaN	NaN	NaN	NaN	NaN	NaN	NaN	NaN	NaN	NaN	17.3297	17.1635	17.6151	17.1523	17.025	17.2235	17.6709	17.3285	17.2624	17.7394	17.4919	NaN	NaN	NaN	NaN	NaN	NaN	NaN	NaN	NaN	NaN	NaN
ITSN2	Intersectin-2	867	VNTSWQKKSAFTRTVSPGSVSPIHGQGQVVE	T(0.077)VS(0.923)PGS(0.614)VS(0.386)PIHGQGQVVENLK	1;2	NaN	NaN	NaN	NaN	NaN	NaN	NaN	NaN	NaN	NaN	NaN	NaN	NaN	NaN	NaN	NaN	NaN	NaN	NaN	NaN	NaN	NaN	NaN	NaN	NaN	NaN	NaN	NaN	NaN	NaN	NaN	NaN	NaN	17.9923	17.766	17.2489	17.5907	17.8759	17.8762	17.4869	17.9075	17.3879	17.4187	17.4336
ITSN2	Intersectin-2	870	SWQKKSAFTRTVSPGSVSPIHGQGQVVENLK	T(0.01)VS(0.037)PGS(0.961)VS(0.992)PIHGQGQVVENLK	1;2	NaN	NaN	NaN	NaN	NaN	NaN	NaN	NaN	NaN	NaN	NaN	18.6146	19.1813	19.1348	19.0536	18.951	18.8982	18.876	18.7972	18.7554	18.5136	18.6223	NaN	NaN	NaN	NaN	NaN	NaN	NaN	NaN	NaN	NaN	NaN	NaN	NaN	NaN	NaN	NaN	NaN	NaN	NaN	NaN	NaN	NaN
ITSN2	Intersectin-2	872	QKKSAFTRTVSPGSVSPIHGQGQVVENLKAQ	TVSPGS(0.004)VS(0.996)PIHGQGQVVENLK	1;2	19.3805	19.7317	19.8029	19.6583	19.5924	19.4397	19.3838	19.4298	19.5919	19.2878	19.4226	20.0716	20.3193	20.3162	20.2032	20.1415	20.9029	19.9781	20.2286	20.1039	19.8741	20.0916	19.2964	19.9649	19.7766	19.5583	19.6693	19.5775	19.2585	19.5882	19.3272	19.3497	19.4194	18.4803	18.7809	18.7279	18.5698	18.4059	18.4922	18.3966	18.6205	18.2581	18.565	18.623
PDLIM2	PDZ and LIM domain protein 2	239	AEERGGTPAFLPSSLSPQSSLPASRALATPP	LLQEALEAEERGGTPAFLPS(0.058)S(0.045)LS(0.861)PQS(0.028)S(0.007)LPAS(0.001)R	1	NaN	NaN	NaN	NaN	NaN	NaN	NaN	NaN	NaN	NaN	NaN	NaN	NaN	NaN	NaN	NaN	NaN	NaN	NaN	NaN	NaN	NaN	17.6942	18.0642	17.7913	17.691	17.2099	17.8427	18.2164	17.3911	17.5994	17.9683	17.4106	NaN	NaN	NaN	NaN	NaN	NaN	NaN	NaN	NaN	NaN	NaN
SMTN	Smoothelin	835	RKAMIEKLEKEGAAGSPGGPRAAVQRSTSFG	EGAAGS(1)PGGPR	1	16.0765	17.0611	16.4535	16.1657	15.8353	16.6657	16.3493	15.7282	16.0189	16.2456	15.5239	NaN	NaN	NaN	NaN	NaN	NaN	NaN	NaN	NaN	NaN	NaN	NaN	NaN	NaN	NaN	NaN	NaN	NaN	NaN	NaN	NaN	NaN	NaN	NaN	NaN	NaN	NaN	NaN	NaN	NaN	NaN	NaN	NaN
SMTN	Smoothelin	333	VNKLLSGPKETPAAQSPTRGPSDTKRADVAG	ETPAAQS(0.999)PT(0.001)RGPSDTK	1	20.5152	21.0527	20.6536	20.6762	20.6307	20.51	20.5485	20.135	20.3461	20.5167	20.202	21.149	21.51	21.3502	21.2786	21.4028	21.1383	21.1998	20.8626	21.171	21.1638	20.7922	20.3388	20.5629	20.3664	20.2205	20.0957	20.4931	20.3918	19.8765	19.8347	20.1488	19.9119	21.3064	21.5203	21.3448	21.309	21.1687	21.6424	21.4192	21.3588	21.2013	21.1932	21.2306
SMTN	Smoothelin	785	SSKKMGSIFDREDQASPRAGSLAALEKRQAE	MGSIFDREDQAS(1)PR	1	NaN	NaN	NaN	NaN	NaN	NaN	NaN	NaN	NaN	NaN	NaN	NaN	NaN	NaN	NaN	NaN	NaN	NaN	NaN	NaN	NaN	NaN	NaN	NaN	NaN	NaN	NaN	NaN	NaN	NaN	NaN	NaN	NaN	18.826	18.9919	18.4777	18.2991	18.4747	19.084	18.7309	18.436	18.2887	18.1926	17.8624
SMTN	Smoothelin	360	DVAGPRPCQRSLSVLSPRQPAQNRESTPLAS	SLSVLS(1)PR	1	NaN	NaN	NaN	NaN	NaN	NaN	NaN	NaN	NaN	NaN	NaN	18.2473	18.5162	18.3319	18.4567	18.2822	18.1637	18.4621	18.0442	18.4396	18.4291	18.3067	18.5648	18.6196	18.5165	18.3503	18.2842	18.5978	18.7287	18.3804	18.1894	18.8808	18.2817	18.8471	19.04	19.0138	18.9248	18.8358	19.2427	19.0049	18.7871	18.7408	18.8799	18.8227
SMTN	Smoothelin	570	LSTSSGGKSTITRVNSPGTLARLGSVTHVTS	S(0.003)T(0.004)IT(0.003)RVNS(0.952)PGT(0.038)LAR	1	NaN	NaN	NaN	NaN	NaN	NaN	NaN	NaN	NaN	NaN	NaN	NaN	NaN	NaN	NaN	NaN	NaN	NaN	NaN	NaN	NaN	NaN	NaN	NaN	NaN	NaN	NaN	NaN	NaN	NaN	NaN	NaN	NaN	19.6679	20.0262	19.6775	19.5828	19.2858	19.9627	19.957	19.8334	19.5298	19.8524	19.4641
SMTN	Smoothelin	848	AGSPGGPRAAVQRSTSFGVPNANSIKQMLLD	S(0.004)T(0.004)S(0.991)FGVPNANSIK	1	NaN	NaN	NaN	NaN	NaN	NaN	NaN	NaN	NaN	NaN	NaN	NaN	NaN	NaN	NaN	NaN	NaN	NaN	NaN	NaN	NaN	NaN	NaN	NaN	NaN	NaN	NaN	NaN	NaN	NaN	NaN	NaN	NaN	17.4879	17.3694	17.509	17.3011	17.1417	17.5676	17.7388	17.3303	17.1226	17.6697	17.1704
PHF23	PHD finger protein 23	62	YIPPSKEESDWPASGSSSPLRGESAADSDGW	EES(0.001)DWPAS(0.174)GS(0.563)S(0.13)S(0.13)PLRGES(0.002)AADSDGWDSAPSDLR	1	17.3078	18.1142	18.2948	18.0118	18.0276	16.4962	17.7147	17.5542	18.0639	17.9151	17.6791	NaN	NaN	NaN	NaN	NaN	NaN	NaN	NaN	NaN	NaN	NaN	NaN	NaN	NaN	NaN	NaN	NaN	NaN	NaN	NaN	NaN	NaN	NaN	NaN	NaN	NaN	NaN	NaN	NaN	NaN	NaN	NaN	NaN
NRSN2	Neurensin-2	10	______MMPSCNRSCSCSRGPSVEDGKWYGV	S(0.234)CS(0.743)CS(0.024)RGPSVEDGK	1	NaN	NaN	NaN	NaN	NaN	NaN	NaN	NaN	NaN	NaN	NaN	17.7736	18.2905	17.9037	17.8162	18.1947	17.5802	18.103	18.2902	18.4034	18.2104	17.9756	NaN	NaN	NaN	NaN	NaN	NaN	NaN	NaN	NaN	NaN	NaN	NaN	NaN	NaN	NaN	NaN	NaN	NaN	NaN	NaN	NaN	NaN
INPP5J	Phosphatidylinositol 4,5-bisphosphate 5-phosphatase A	241	RSPGLARFPGLALRPSSRERRGASRSPSPQS	FPGLALRPS(0.5)S(0.5)RER	1	NaN	NaN	NaN	NaN	NaN	NaN	NaN	NaN	NaN	NaN	NaN	16.0878	16.7179	16.6554	17.0232	16.5226	16.4131	16.6788	16.8049	17.0465	16.7333	16.9683	17.1759	17.4573	17.4979	17.346	17.1762	17.2813	17.5936	17.3925	17.1504	17.7516	17.2169	17.2883	17.2986	17.5853	17.5375	17.2584	17.1745	17.3848	17.5181	17.1767	17.2162	17.2546
INPP5J	Phosphatidylinositol 4,5-bisphosphate 5-phosphatase A	242	SPGLARFPGLALRPSSRERRGASRSPSPQSR	FPGLALRPS(0.5)S(0.5)RER	1	NaN	NaN	NaN	NaN	NaN	NaN	NaN	NaN	NaN	NaN	NaN	16.0878	16.7179	16.6554	17.0232	16.5226	16.4131	16.6788	16.8049	17.0465	16.7333	16.9683	17.1759	17.4573	17.4979	17.346	17.1762	17.2813	17.5936	17.3925	17.1504	17.7516	17.2169	17.2883	17.2986	17.5853	17.5375	17.2584	17.1745	17.3848	17.5181	17.1767	17.2162	17.2546
ZNF48	Zinc finger protein 48	340	DKPHKCPECGKGFRRSSDLVKHHRVHTGEKP	RS(0.712)S(0.288)DLVK	1	NaN	NaN	NaN	NaN	NaN	NaN	NaN	NaN	NaN	NaN	NaN	NaN	NaN	NaN	NaN	NaN	NaN	NaN	NaN	NaN	NaN	NaN	18.6181	18.6064	18.5026	18.3817	18.1632	18.5237	18.6104	18.2697	18.2061	18.5082	18.1599	NaN	NaN	NaN	NaN	NaN	NaN	NaN	NaN	NaN	NaN	NaN
ZNF48	Zinc finger protein 48	341	KPHKCPECGKGFRRSSDLVKHHRVHTGEKPY	RS(0.165)S(0.835)DLVK	1	NaN	NaN	NaN	NaN	NaN	NaN	NaN	NaN	NaN	NaN	NaN	NaN	NaN	NaN	NaN	NaN	NaN	NaN	NaN	NaN	NaN	NaN	17.3204	17.348	17.0778	16.9829	16.7742	17.2237	17.2737	16.8625	16.8249	17.3253	16.6112	19.2743	19.42	18.9851	18.8967	18.639	19.2766	19.2023	18.8136	18.6769	19.2521	18.5921
SSBP3	Single-stranded DNA-binding protein 3	237	NGSLGSGDIDGLPKNSPNNISGISNPPGTPR	NS(0.906)PNNIS(0.053)GIS(0.041)NPPGTPR	1	NaN	NaN	NaN	NaN	NaN	NaN	NaN	NaN	NaN	NaN	NaN	NaN	NaN	NaN	NaN	NaN	NaN	NaN	NaN	NaN	NaN	NaN	NaN	NaN	NaN	NaN	NaN	NaN	NaN	NaN	NaN	NaN	NaN	NaN	NaN	NaN	NaN	NaN	NaN	NaN	NaN	NaN	NaN	NaN
UBE2D1;UBE2D4;UBE2D3;UBE2D2	Ubiquitin-conjugating enzyme E2 D4;Ubiquitin-conjugating enzyme E2 D1;Ubiquitin-conjugating enzyme E2 D2;Ubiquitin-conjugating enzyme E2 D3	54	AFTTKIYHPNINSNGSICLDILRSQWSPALT;AFTTRIYHPNINSNGSICLDILRSQWSPALT	IYHPNINS(0.029)NGS(0.971)ICLDILR	1	16.4611	16.6067	16.5518	16.74	16.6301	16.8659	16.8198	16.6682	16.8117	16.7815	16.5498	NaN	NaN	NaN	NaN	NaN	NaN	NaN	NaN	NaN	NaN	NaN	15.6723	15.607	15.6946	15.4356	15.3836	15.7103	16.0647	15.8062	15.6451	16.1034	15.5613	NaN	NaN	NaN	NaN	NaN	NaN	NaN	NaN	NaN	NaN	NaN
C11orf96	Uncharacterized protein C11orf96	72	PVTFDEIQEVEEEGVSPMEEEKAKKSFLQSL	TQPVTFDEIQEVEEEGVS(1)PMEEEK	1	NaN	NaN	NaN	NaN	NaN	NaN	NaN	NaN	NaN	NaN	NaN	NaN	NaN	NaN	NaN	NaN	NaN	NaN	NaN	NaN	NaN	NaN	NaN	NaN	NaN	NaN	NaN	NaN	NaN	NaN	NaN	NaN	NaN	16.7686	17.0847	17.1681	17.0299	17.2129	16.9555	16.5314	16.5555	16.6907	16.7931	16.7989
C11orf96	Uncharacterized protein C11orf96	112	LSLQREQLSSCKLRNSLDSSDSDSAL_____	LRNS(0.999)LDS(0.001)SDSDSAL	1	18.3164	18.4835	18.5957	18.6344	18.5034	18.2762	18.5819	18.1461	18.3646	18.1282	17.9912	18.948	19.4767	19.5754	19.4612	19.3535	18.8797	19.1043	18.8245	19.0631	18.8959	18.9893	NaN	NaN	NaN	NaN	NaN	NaN	NaN	NaN	NaN	NaN	NaN	19.1846	19.21	19.0957	19.4465	19.3408	19.1405	18.898	19.0175	18.787	19.0318	18.9498
C11orf96	Uncharacterized protein C11orf96	86	VSPMEEEKAKKSFLQSLECLRRSTQSLSLQR	SFLQS(1)LECLR	1;2	20.6805	20.3993	20.3865	20.4912	20.6232	20.0162	20.1421	20.2428	20.0222	20.3349	20.4055	20.0777	19.7953	20.0976	20.0503	20.0709	19.665	19.7344	19.8327	19.4909	19.7793	19.9525	19.399	19.2724	19.3069	19.328	19.3715	18.6417	18.8146	19.2383	18.6989	19.1937	19.1941	19.7788	19.7406	19.7889	19.8874	19.9249	19.1377	19.4806	19.8126	19.1425	19.8564	19.8
LLGL1;LLGL2	Lethal(2) giant larvae protein homolog 1;Lethal(2) giant larvae protein homolog 2	653	GPLSRVKSLKKSLRQSFRRIRKSRVSGKKRA;GPLSRVKSLKKSLRQSFRRMRRSRVSSRKRH	S(1)LRQS(1)FRR	1;2	20.8369	20.6977	20.4204	20.6661	20.8787	20.6768	20.8718	20.8428	20.8025	21.259	20.8477	20.3829	20.4981	20.3855	20.4406	20.5029	20.4053	20.4912	20.5099	20.4469	20.4967	20.4322	19.6835	19.8118	19.9399	19.7618	19.5678	19.8204	19.8797	19.853	19.5278	19.8365	19.6505	17.7724	17.9782	17.9136	17.932	17.6661	17.7944	18.1443	17.8363	17.5574	18.186	17.6032
SYN2	Synapsin-2	168	VISKMNQLLSRTPALSPQRPLTTQQPQSGTL	TPALS(1)PQRPLTTQQPQSGTLK	1	17.0751	17.8033	17.5932	17.6221	17.545	17.0851	17.4591	17.1064	17.4874	17.2053	17.2784	16.3681	16.7316	16.6251	16.7852	16.7582	16.6537	16.4745	16.3661	16.5467	16.2423	16.3289	17.84	18.2334	17.9879	17.9986	17.8877	17.6479	17.6844	17.6703	17.3968	17.4138	17.5315	18.419	18.8313	18.6795	18.5194	18.3913	18.5045	18.2651	18.3039	18.1549	18.0822	18.2021
KIF1B;KIF1Bbeta	Kinesin-like protein;Kinesin-like protein KIF1B	1428	TGIYELSLCKMSDTGSPGMQRRRRKILDTSV	MSDTGS(1)PGMQR	1	18.605	18.7506	18.7964	18.8645	18.9192	18.4792	18.7852	18.9372	18.9989	18.8563	18.7609	NaN	NaN	NaN	NaN	NaN	NaN	NaN	NaN	NaN	NaN	NaN	17.7311	17.746	17.7808	17.6007	17.5618	17.405	17.5655	17.7481	17.5975	17.581	17.536	20.2	20.045	20.1663	20.105	20.1378	20.1504	19.9207	20.0668	19.9391	19.8462	20.0031
KIF1B;KIF1Bbeta	Kinesin-like protein;Kinesin-like protein KIF1B	1031	NQSDFSSVAMTRSGLSLEELRIVEGQGQSSE	S(0.001)GLS(0.999)LEELR	1	18.1977	17.3556	17.4435	17.511	17.7903	18.2901	18.1482	18.3876	18.5643	18.3834	18.4697	17.6844	16.9363	17.1141	17.2111	17.185	17.3568	17.9045	17.7909	17.9314	17.8159	17.9556	18.1041	17.3492	17.2945	17.1048	17.3376	18.1358	18.1322	18.2802	18.079	18.1184	18.2975	NaN	NaN	NaN	NaN	NaN	NaN	NaN	NaN	NaN	NaN	NaN
DVL1;DVL1P1	Segment polarity protein dishevelled homolog DVL-1;Putative segment polarity protein dishevelled homolog DVL1P1	428	RELAAVPPELTGSRQSFQKAMGNPCEFFVDI	ELAAVPPELT(0.021)GS(0.278)RQS(0.701)FQK	1	17.0156	16.9552	16.9786	17.1717	17.0511	18.3883	17.301	17.0003	17.4063	17.1267	17.1895	NaN	NaN	NaN	NaN	NaN	NaN	NaN	NaN	NaN	NaN	NaN	NaN	NaN	NaN	NaN	NaN	NaN	NaN	NaN	NaN	NaN	NaN	NaN	NaN	NaN	NaN	NaN	NaN	NaN	NaN	NaN	NaN	NaN
DVL1	Segment polarity protein dishevelled homolog DVL-1	89	NGRVVSWLVLAEGAHSDAGSQGTDSHTDLPP	VVS(0.001)WLVLAEGAHS(0.998)DAGS(0.805)QGT(0.157)DS(0.033)HT(0.005)DLPPPLER	1;2	NaN	NaN	NaN	NaN	NaN	NaN	NaN	NaN	NaN	NaN	NaN	NaN	NaN	NaN	NaN	NaN	NaN	NaN	NaN	NaN	NaN	NaN	15.4429	15.433	15.5471	15.4745	15.5953	15.819	15.7869	15.3648	15.7119	16.1439	15.73	NaN	NaN	NaN	NaN	NaN	NaN	NaN	NaN	NaN	NaN	NaN
DVL1	Segment polarity protein dishevelled homolog DVL-1	93	VSWLVLAEGAHSDAGSQGTDSHTDLPPPLER	VVSWLVLAEGAHS(0.99)DAGS(0.865)QGT(0.141)DS(0.003)HT(0.001)DLPPPLER	1;2	15.8181	15.904	16.0218	15.9874	15.9178	17.0321	16.0021	16.022	16.2939	16.2395	15.9384	NaN	NaN	NaN	NaN	NaN	NaN	NaN	NaN	NaN	NaN	NaN	NaN	NaN	NaN	NaN	NaN	NaN	NaN	NaN	NaN	NaN	NaN	NaN	NaN	NaN	NaN	NaN	NaN	NaN	NaN	NaN	NaN	NaN
ZNF814;ZNF552	Putative uncharacterized zinc finger protein 814;Zinc finger protein 552	87	YIQRETQVRTPMAGVSPKKAHPCEMCGPILG	TPMAGVS(1)PK	1	NaN	NaN	NaN	NaN	NaN	NaN	NaN	NaN	NaN	NaN	NaN	18.9004	19.1814	19.3079	19.2691	19.3629	19.6436	19.3749	19.2669	19.5469	19.1117	19.4995	18.4211	18.5069	18.6851	18.5693	18.3831	18.4521	18.6591	18.6969	18.5044	18.528	18.6633	19.8811	20.2365	20.3021	20.2169	20.2489	20.0824	20.17	20.2025	20.1118	20.318	20.2619
POLD2	DNA polymerase delta subunit 2	15	_MFSEQAAQRAHTLLSPPSANNATFARVPVA	AHTLLS(1)PPSANNATFAR	1	NaN	NaN	NaN	NaN	NaN	NaN	NaN	NaN	NaN	NaN	NaN	17.3848	18.4731	17.5738	17.8509	17.4113	18.0466	17.5984	16.2937	17.273	17.3066	16.5072	16.7157	16.9258	17.1042	16.9023	16.3357	17.1126	17.2094	16.646	16.4999	17.2125	16.5085	18.6646	18.7293	18.2519	18.1355	18.1274	18.9577	18.7729	18.4084	18.3334	18.9928	18.3784
SSH3	Protein phosphatase Slingshot homolog 3	64	EELHGDQTDFGQGSQSPQKQEEQRQHLHLMV	APSEEELHGDQT(0.004)DFGQGS(0.178)QS(0.819)PQK	1	NaN	NaN	NaN	NaN	NaN	NaN	NaN	NaN	NaN	NaN	NaN	NaN	NaN	NaN	NaN	NaN	NaN	NaN	NaN	NaN	NaN	NaN	17.509	17.4214	17.4353	17.2195	17.4344	17.614	17.251	17.5603	17.0989	16.9275	17.2208	NaN	NaN	NaN	NaN	NaN	NaN	NaN	NaN	NaN	NaN	NaN
SSH3	Protein phosphatase Slingshot homolog 3	14	__XAVQRRSRLQRRQSFAVLRGAVLGLQDGG	RQS(1)FAVLR	1	16.4714	16.6862	16.5756	16.593	16.6261	16.4112	16.9852	16.9674	16.808	17.0354	17.0305	16.2014	16.2758	16.1991	16.1611	16.2185	16.4892	16.4798	16.6745	16.3837	16.7517	16.7277	NaN	NaN	NaN	NaN	NaN	NaN	NaN	NaN	NaN	NaN	NaN	NaN	NaN	NaN	NaN	NaN	NaN	NaN	NaN	NaN	NaN	NaN
GLTSCR1	Glioma tumor suppressor candidate region gene 1 protein	1361	PGAPEGTPAGRARGGSPAPLPAKVDEATSGL	GGS(1)PAPLPAK	1	NaN	NaN	NaN	NaN	NaN	NaN	NaN	NaN	NaN	NaN	NaN	NaN	NaN	NaN	NaN	NaN	NaN	NaN	NaN	NaN	NaN	NaN	NaN	NaN	NaN	NaN	NaN	NaN	NaN	NaN	NaN	NaN	NaN	NaN	NaN	NaN	NaN	NaN	NaN	NaN	NaN	NaN	NaN	NaN
SMC6	Structural maintenance of chromosomes protein 6	10	______MAKRKEENFSSPKNAKRPRQEELED	RKEENFS(0.5)S(0.5)PK	1	NaN	NaN	NaN	NaN	NaN	NaN	NaN	NaN	NaN	NaN	NaN	NaN	NaN	NaN	NaN	NaN	NaN	NaN	NaN	NaN	NaN	NaN	NaN	NaN	NaN	NaN	NaN	NaN	NaN	NaN	NaN	NaN	NaN	NaN	NaN	NaN	NaN	NaN	NaN	NaN	NaN	NaN	NaN	NaN
SMC6	Structural maintenance of chromosomes protein 6	11	_____MAKRKEENFSSPKNAKRPRQEELEDF	RKEENFS(0.002)S(0.998)PK	1	19.189	19.6101	19.3333	19.391	19.1877	19.4665	19.4593	18.875	19.3283	19.2581	19.0174	21.0344	21.1295	20.8987	20.908	20.8738	21.0209	21.3159	20.9059	21.3249	21.0885	21.0595	19.9879	19.9838	19.7662	19.7016	19.4588	20.1177	19.7444	19.6499	19.6889	19.7016	19.4782	20.1064	20.5103	20.2126	20.1214	19.997	20.3168	20.1224	19.872	19.8467	19.9203	19.8363
GMPR2	GMP reductase 2;GMP reductase	44	DFKDVLLRPKRSTLKSRSEVDLTRSFSFRNS	S(0.708)RS(0.292)EVDLT(0.001)R	1	18.2855	18.584	18.7747	18.5225	18.6856	18.5349	18.535	18.5469	18.5201	18.6304	18.5053	NaN	NaN	NaN	NaN	NaN	NaN	NaN	NaN	NaN	NaN	NaN	17.9646	17.9234	18.1028	17.8549	17.7714	17.9144	17.8378	17.9673	17.64	17.7629	17.8614	NaN	NaN	NaN	NaN	NaN	NaN	NaN	NaN	NaN	NaN	NaN
GMPR2	GMP reductase 2;GMP reductase	46	KDVLLRPKRSTLKSRSEVDLTRSFSFRNSKQ	S(0.1)RS(0.9)EVDLTR	1	NaN	NaN	NaN	NaN	NaN	NaN	NaN	NaN	NaN	NaN	NaN	17.9831	18.0973	18.1476	18.0961	18.0633	17.8725	18.233	17.944	18.0887	18.0486	17.9583	17.9646	17.9234	18.1028	17.8549	17.7714	17.9144	17.8378	17.9673	17.64	17.7629	17.8614	18.1763	18.1925	18.2699	18.437	18.1607	18.0707	17.9399	18.1509	18.2413	18.0575	18.365
RBM15	Putative RNA-binding protein 15	664	RLLLERPSPIRDRRGSLEKSQGDKRDRKNSA	DRRGS(1)LEK	1	18.3892	18.7715	18.6817	18.6513	18.5278	18.6084	18.7075	18.4415	18.76	18.5632	18.7143	18.7315	19.1015	18.854	18.7382	19.0037	19.2071	19.0378	19.2105	19.2235	18.9947	19.3371	17.8665	18.0014	18.0892	17.9156	17.7853	18.0746	18.0913	18.0284	17.6221	18.118	17.9499	NaN	NaN	NaN	NaN	NaN	NaN	NaN	NaN	NaN	NaN	NaN
RBM15	Putative RNA-binding protein 15	642	PDRSPELSSSRDRYNSDNDRSSRLLLERPSP	DRYNS(1)DNDRSSR	1	15.4149	15.9525	15.9315	15.9031	15.722	15.3957	15.5822	15.4822	15.8582	15.457	15.6086	NaN	NaN	NaN	NaN	NaN	NaN	NaN	NaN	NaN	NaN	NaN	15.146	15.3016	15.4739	15.3592	15.4015	14.8517	15.1619	14.9749	14.9346	15.0355	14.9113	NaN	NaN	NaN	NaN	NaN	NaN	NaN	NaN	NaN	NaN	NaN
RBM15	Putative RNA-binding protein 15	885	KENTGVLHAFPPCEFSQQFLDSPAKALAKSE	ENT(0.001)GVLHAFPPCEFS(0.579)QQFLDS(0.42)PAK	1	NaN	NaN	NaN	NaN	NaN	NaN	NaN	NaN	NaN	NaN	NaN	NaN	NaN	NaN	NaN	NaN	NaN	NaN	NaN	NaN	NaN	NaN	18.2554	18.3258	18.1794	18.2449	18.3417	18.1813	18.2385	18.0261	17.8788	18.3894	18.0851	NaN	NaN	NaN	NaN	NaN	NaN	NaN	NaN	NaN	NaN	NaN
RBM15	Putative RNA-binding protein 15	891	LHAFPPCEFSQQFLDSPAKALAKSEEDYLVM	ENTGVLHAFPPCEFSQQFLDS(1)PAK	1	19.6167	20.0303	19.7802	19.7182	19.6042	19.7169	19.8873	19.3616	19.7258	19.7537	19.4051	20.4888	20.7312	20.5656	20.5119	20.356	20.4548	20.4735	20.1286	20.336	20.4865	20.1289	16.8073	16.6619	16.9315	16.7502	16.5108	16.7789	17.0564	16.7713	16.5214	17.0877	16.6147	19.4713	19.8847	19.5446	19.3294	19.4666	19.635	19.4534	19.1297	19.0294	19.5312	19.2941
RBM15	Putative RNA-binding protein 15	110	ESRSSSRGGGGESRSSGAASSAPGGGDGAEY	GGGGES(0.018)RS(0.198)S(0.783)GAASS(0.001)APGGGDGAEYK	1	NaN	NaN	NaN	NaN	NaN	NaN	NaN	NaN	NaN	NaN	NaN	NaN	NaN	NaN	NaN	NaN	NaN	NaN	NaN	NaN	NaN	NaN	17.2997	17.6727	17.6457	17.3869	17.1772	17.4937	17.6254	17.4676	17.147	17.6852	17.1436	NaN	NaN	NaN	NaN	NaN	NaN	NaN	NaN	NaN	NaN	NaN
RBM15	Putative RNA-binding protein 15	65	SRRSLHLDKSSSRGGSREYDTGGGSSSSRLH	GGS(1)REYDTGGGSSSSR	1	20.8944	19.8744	20.1755	20.2045	20.4568	21.2208	21.1954	21.2215	21.2681	21.1668	21.2966	22.1443	21.8544	21.9632	22.1496	22.2867	22.5252	22.3104	22.3859	22.3127	22.2723	22.4786	20.4811	19.3822	19.3801	19.5547	19.8398	20.6104	20.7111	20.6884	20.3735	20.5249	20.5764	22.5374	22.565	22.726	22.7418	22.6599	22.9434	22.8035	22.8948	22.4716	22.7725	22.6696
RBM15	Putative RNA-binding protein 15	77	RGGSREYDTGGGSSSSRLHSYSSPSTKNSSG	GGS(0.003)REYDT(0.01)GGGS(0.106)S(0.106)S(0.106)S(0.669)R	1	NaN	NaN	NaN	NaN	NaN	NaN	NaN	NaN	NaN	NaN	NaN	18.8165	17.2698	17.4102	17.7728	18.1694	19.2489	19.0575	19.0312	19.0885	18.886	19.2519	NaN	NaN	NaN	NaN	NaN	NaN	NaN	NaN	NaN	NaN	NaN	NaN	NaN	NaN	NaN	NaN	NaN	NaN	NaN	NaN	NaN	NaN
RBM15	Putative RNA-binding protein 15	626	RSPESDRPRKRHCAPSPDRSPELSSSRDRYN	HCAPS(1)PDRS(1)PELSSSR	1;2	17.412	18.0672	17.8132	17.6182	17.7205	18.9957	17.1984	17.1482	17.4792	17.4767	17.559	18.1629	19.0047	18.7375	18.2569	18.5819	19.6352	18.4548	18.8574	18.9906	18.9707	18.8559	NaN	NaN	NaN	NaN	NaN	NaN	NaN	NaN	NaN	NaN	NaN	NaN	NaN	NaN	NaN	NaN	NaN	NaN	NaN	NaN	NaN	NaN
RBM15	Putative RNA-binding protein 15	612	KRRLPEESGGRHLDRSPESDRPRKRHCAPSP	HLDRS(1)PESDRPR	1	19.9799	20.5207	20.5211	20.4598	20.3797	22.8453	20.47	20.4932	20.6541	20.3958	20.6	19.6232	20.0015	19.8935	19.7888	19.8492	22.1854	20.0375	19.9123	20.1158	19.7653	19.9818	20.1426	19.883	20.2354	20.0179	20.1752	20.2947	21.078	20.3391	19.909	21.7123	20.0558	19.615	19.1017	19.7553	19.6163	19.5521	19.7909	20.8458	19.9942	19.5766	21.4695	19.6478
RBM15	Putative RNA-binding protein 15	615	LPEESGGRHLDRSPESDRPRKRHCAPSPDRS	HLDRS(0.222)PES(0.778)DRPR	1	NaN	NaN	NaN	NaN	NaN	NaN	NaN	NaN	NaN	NaN	NaN	19.5135	19.8213	19.866	19.7906	19.8209	21.4975	19.8471	19.6987	19.6702	19.6312	19.9266	NaN	NaN	NaN	NaN	NaN	NaN	NaN	NaN	NaN	NaN	NaN	NaN	NaN	NaN	NaN	NaN	NaN	NaN	NaN	NaN	NaN	NaN
RBM15	Putative RNA-binding protein 15	135	GDGAEYKTLKISELGSQLSDEAVEDGLFHEF	IS(0.026)ELGS(0.968)QLS(0.006)DEAVEDGLFHEFK	1	NaN	NaN	NaN	NaN	NaN	NaN	NaN	NaN	NaN	NaN	NaN	NaN	NaN	NaN	NaN	NaN	NaN	NaN	NaN	NaN	NaN	NaN	17.8774	17.5454	17.4634	17.4944	17.39	17.4044	17.449	17.1933	17.3177	17.6798	17.1054	NaN	NaN	NaN	NaN	NaN	NaN	NaN	NaN	NaN	NaN	NaN
RBM15	Putative RNA-binding protein 15	138	AEYKTLKISELGSQLSDEAVEDGLFHEFKRF	ISELGS(0.003)QLS(0.997)DEAVEDGLFHEFK	1	18.9568	18.5292	18.6442	18.6595	18.7764	18.5014	18.8936	18.7321	18.9785	19.074	18.7162	18.2335	17.3509	17.8066	18.0174	18.0757	17.8861	18.3915	18.022	18.2047	18.1969	18.1501	16.8716	16.5626	16.7064	16.7473	16.6626	17.0089	16.9498	17.0167	16.7487	17.13	16.8782	17.6872	16.7326	16.9109	17.2015	17.1823	17.6503	17.178	17.0227	17.2248	17.6821	17.2552
RBM15	Putative RNA-binding protein 15	164	EFKRFGDVSVKISHLSGSGSGDERVAFVNFR	ISHLS(0.999)GSGSGDER	1	NaN	NaN	NaN	NaN	NaN	NaN	NaN	NaN	NaN	NaN	NaN	NaN	NaN	NaN	NaN	NaN	NaN	NaN	NaN	NaN	NaN	NaN	NaN	NaN	NaN	NaN	NaN	NaN	NaN	NaN	NaN	NaN	NaN	NaN	NaN	NaN	NaN	NaN	NaN	NaN	NaN	NaN	NaN	NaN
RBM15	Putative RNA-binding protein 15	678	GSLEKSQGDKRDRKNSASAERDRKHRTTAPT	KNS(0.999)AS(0.001)AER	1	17.6928	18.4177	18.2766	18.2397	18.094	17.8025	18.2571	18.2695	18.267	18.2146	18.3083	22.1718	22.7696	22.5029	22.5739	22.4612	22.3995	22.6289	22.6494	22.5851	22.4623	22.738	17.8801	18.2083	18.0578	17.841	17.7751	18.1227	18.3611	18.0419	17.7977	18.0844	17.8696	21.1659	21.5366	21.4049	21.3569	21.1685	21.4729	21.678	21.4446	21.1574	21.4971	21.3221
RBM15	Putative RNA-binding protein 15	680	LEKSQGDKRDRKNSASAERDRKHRTTAPTEG	NSAS(1)AERDRK	1	23.107	23.0208	23.1184	23.1263	23.2888	22.7891	23.3171	23.3931	23.4594	23.4435	23.5019	23.4549	23.4382	23.4786	23.5738	23.6795	23.2495	23.7993	23.8426	23.9207	23.7465	23.8797	23.2232	23.2294	23.2807	23.1346	23.16	23.3479	23.4144	23.5057	23.278	23.3144	23.5309	22.7536	22.8145	22.8211	22.7253	22.7352	22.9145	23.0164	23.0898	22.8021	22.9553	23.0506
RBM15	Putative RNA-binding protein 15	83	YDTGGGSSSSRLHSYSSPSTKNSSGGGESRS	LHSYS(0.968)S(0.032)PSTK	1	17.4271	17.8703	17.6231	17.4478	17.2699	17.3638	17.315	16.9517	17.4375	17.1934	16.9869	NaN	NaN	NaN	NaN	NaN	NaN	NaN	NaN	NaN	NaN	NaN	21.8339	22.0211	21.6971	21.7395	21.8288	22.2	21.5759	21.4448	21.3597	21.2596	21.3797	NaN	NaN	NaN	NaN	NaN	NaN	NaN	NaN	NaN	NaN	NaN
RBM15	Putative RNA-binding protein 15	84	DTGGGSSSSRLHSYSSPSTKNSSGGGESRSS	LHSYS(0.065)S(0.935)PSTK	1;2	21.2618	21.7831	21.5456	21.3163	21.2914	21.5305	21.1705	20.9501	21.3129	21.0777	20.9694	22.1839	22.7239	22.5254	22.3886	22.4185	22.5806	22.1309	21.9554	22.2448	22.0966	22.0083	NaN	NaN	NaN	NaN	NaN	NaN	NaN	NaN	NaN	NaN	NaN	22.2668	22.5833	22.1302	22.1817	22.2218	22.4619	22.081	22.1562	21.8485	21.8868	22.0782
RBM15	Putative RNA-binding protein 15	86	GGGSSSSRLHSYSSPSTKNSSGGGESRSSSR	LHSYS(0.063)S(0.063)PS(0.811)T(0.063)K	1	NaN	NaN	NaN	NaN	NaN	NaN	NaN	NaN	NaN	NaN	NaN	18.6962	19.1655	18.8637	18.6769	18.801	18.7373	18.6382	18.4833	18.7106	18.3269	18.3611	NaN	NaN	NaN	NaN	NaN	NaN	NaN	NaN	NaN	NaN	NaN	NaN	NaN	NaN	NaN	NaN	NaN	NaN	NaN	NaN	NaN	NaN
RBM15	Putative RNA-binding protein 15	721	DGSAPSTSTASSKLKSPSQKQDGGTAPVASA	LKS(0.996)PS(0.004)QK	1	22.9552	23.4126	23.0428	23.1311	23.0225	23.2026	23.3665	23.0666	23.4457	23.2027	23.3041	22.7912	23.1769	22.8143	22.9557	22.8178	23.097	23.166	22.891	23.3074	22.9687	23.1437	22.4695	22.5827	22.2511	22.317	22.1261	22.6358	22.6497	22.4236	22.4648	22.5798	22.5348	22.7468	22.8929	22.5635	22.6212	22.408	22.9467	23.0244	22.7533	22.7874	22.8723	22.8458
RBM15	Putative RNA-binding protein 15	723	SAPSTSTASSKLKSPSQKQDGGTAPVASASP	LKS(0.432)PS(0.568)QK	1	NaN	NaN	NaN	NaN	NaN	NaN	NaN	NaN	NaN	NaN	NaN	NaN	NaN	NaN	NaN	NaN	NaN	NaN	NaN	NaN	NaN	NaN	NaN	NaN	NaN	NaN	NaN	NaN	NaN	NaN	NaN	NaN	NaN	NaN	NaN	NaN	NaN	NaN	NaN	NaN	NaN	NaN	NaN	NaN
RBM15	Putative RNA-binding protein 15	737	PSQKQDGGTAPVASASPKLCLAWQGMLLLKN	QDGGTAPVASAS(1)PK	1	16.4939	16.5234	16.5574	16.3501	16.2438	16.3671	17.0437	16.7312	16.9242	16.781	16.8449	18.4679	18.3456	18.3064	18.4711	18.394	18.5932	18.9069	18.5579	19.0457	18.7977	19.0402	NaN	NaN	NaN	NaN	NaN	NaN	NaN	NaN	NaN	NaN	NaN	19.9496	19.6771	19.8378	19.699	19.3106	20.1498	20.209	20.072	19.8651	19.9855	20.0925
RBM15	Putative RNA-binding protein 15	656	NSDNDRSSRLLLERPSPIRDRRGSLEKSQGD	LLLERPS(1)PIRDR	1	21.8274	22.0702	21.9803	22.0545	21.914	22.1586	22.0983	21.9793	22.0613	22.0344	22.101	22.604	22.9437	22.7875	22.8107	22.8108	22.8405	22.859	22.6931	22.7931	22.6758	22.8733	21.078	21.0544	21.1166	21.0305	21.018	21.2521	21.2837	21.1763	20.8939	21.2182	21.1153	21.0455	21.0521	21.1782	21.0393	21.0203	21.1457	21.2146	21.108	20.93	21.1388	21.0368
RBM15	Putative RNA-binding protein 15	248	VGGHRHPPGGGGGQRSLSPGGAALGYRDYRL	S(0.905)LS(0.095)PGGAALGYR	1	NaN	NaN	NaN	NaN	NaN	NaN	NaN	NaN	NaN	NaN	NaN	NaN	NaN	NaN	NaN	NaN	NaN	NaN	NaN	NaN	NaN	NaN	18.9303	18.7081	19.0511	18.9078	18.8628	19.0922	19.1094	19.0382	18.5472	19.0002	19.0302	17.9423	18.2618	18.1004	18.0611	17.9533	18.071	17.8615	18.0319	17.855	18.086	18.0742
RBM15	Putative RNA-binding protein 15	250	GHRHPPGGGGGQRSLSPGGAALGYRDYRLQQ	SLS(1)PGGAALGYR	1	22.2912	22.3125	22.3559	22.4287	22.3094	22.3634	22.4339	22.3739	22.459	22.4219	22.4761	23.4229	23.4104	23.4354	23.453	23.4726	23.6481	23.5065	23.5633	23.6734	23.5931	23.4969	22.3016	22.3289	22.348	22.2181	22.1842	22.403	22.3706	22.3412	22.1625	22.335	22.3289	23.4997	23.6975	23.8187	23.6054	23.5926	23.6909	23.6168	23.6603	23.4654	23.6174	23.7076
RBM15	Putative RNA-binding protein 15	213	DRPLKIEAVYVSRRRSRSPLDKDTYPPSASV	S(1)RS(1)PLDK	1;2	17.5504	18.3587	18.018	17.9129	17.9391	17.3585	17.7746	17.6087	17.8284	17.6691	17.6697	18.8689	19.3407	19.0381	18.9419	19.0019	17.7681	19.1482	19.102	19.0681	19.1097	19.0494	NaN	NaN	NaN	NaN	NaN	NaN	NaN	NaN	NaN	NaN	NaN	21.5054	22.4332	22.2005	21.9089	21.6727	21.4769	21.3673	21.5215	21.2653	21.3918	21.3458
RBM15	Putative RNA-binding protein 15	215	PLKIEAVYVSRRRSRSPLDKDTYPPSASVVG	S(1)RS(1)PLDK	1;2	20.6957	21.7697	21.3141	21.1856	20.9537	20.4081	20.7371	20.3283	20.5991	20.648	20.56	19.2132	20.2556	19.872	19.7722	19.4349	19.0332	19.1567	18.9065	19.0664	19.1577	19.0966	20.9411	21.7862	21.4516	21.1124	20.9216	20.752	20.778	20.7504	20.4966	20.828	20.7196	21.6894	22.7848	22.3075	22.2442	22.0085	21.5706	21.624	21.5454	21.4041	21.4236	21.4986
RBM15	Putative RNA-binding protein 15	53	GSSSGKTDSGGGSRRSLHLDKSSSRGGSREY	T(0.059)DS(0.071)GGGS(0.214)RRS(0.656)LHLDK	1	NaN	NaN	NaN	NaN	NaN	NaN	NaN	NaN	NaN	NaN	NaN	NaN	NaN	NaN	NaN	NaN	NaN	NaN	NaN	NaN	NaN	NaN	17.0132	18.0139	16.9289	17.1749	17.0513	17.5148	16.7321	16.9759	16.6095	16.7903	16.6088	NaN	NaN	NaN	NaN	NaN	NaN	NaN	NaN	NaN	NaN	NaN
RBM15	Putative RNA-binding protein 15	697	ERDRKHRTTAPTEGKSPLKKEDRSDGSAPST	TTAPTEGKS(1)PLK	1	20.7656	21.2403	21.2606	21.4095	21.2251	21.8509	21.4018	21.2399	21.589	21.3812	21.5435	23.3545	24.0474	23.8645	24.1229	23.855	23.9173	24.093	23.9371	24.2666	23.9615	24.1449	21.6787	21.4987	21.9207	21.8395	21.5796	21.7359	21.8346	21.9315	21.7542	21.665	22.0409	20.8918	20.8206	21.1487	20.9978	20.844	21.0036	21.3896	21.2601	21.0515	21.4201	21.1212
RBM15	Putative RNA-binding protein 15	321	GAGAGAAPFREVDEISPEDDQRANRTLFLGN	VGAGAGAAPFREVDEIS(1)PEDDQRANR	1	19.1965	18.9462	19.033	18.93	18.9078	19.2981	19.1214	18.8471	18.9989	19.3186	18.7899	17.9661	18.1874	17.7902	17.8018	17.9127	18.061	18.0682	17.9367	18.1699	18.0672	17.7175	18.2498	18.0773	18.2009	18.1527	18.1647	18.2692	18.3165	18.2977	18.0772	18.5627	18.0799	20.0616	19.9556	20.1129	19.9254	19.9572	20.0409	20.332	20.1444	19.9339	20.7355	19.9151
RSBN1	Round spermatid basic protein 1	33	EEPDKEGKEKPHAGVSPRGVKRQRRSSSGGS	PHAGVS(1)PR	1	20.477	20.9219	20.4792	20.5524	20.4878	20.9018	20.7075	20.265	20.7714	20.6992	20.3728	22.5968	23.2456	22.9713	23.1096	22.9219	23.0291	22.977	22.6217	23.1823	22.8682	22.8849	21.0771	21.3788	21.2125	21.0818	20.8926	21.1608	21.1152	21.0379	20.9448	21.1558	20.8619	21.3111	21.6054	21.3794	21.4192	21.1327	21.3277	21.4067	21.1351	21.1825	21.2535	21.1983
RSBN1	Round spermatid basic protein 1	43	PHAGVSPRGVKRQRRSSSGGSQEKRGRPSQE	RS(0.914)S(0.083)S(0.003)GGSQEK	1	17.5449	17.9991	17.9498	17.7318	17.8971	16.9122	17.8728	17.9094	17.964	17.8991	17.8739	20.5329	20.7611	20.8086	20.6777	20.8473	19.8974	20.5322	20.6197	20.6806	20.5551	20.6115	NaN	NaN	NaN	NaN	NaN	NaN	NaN	NaN	NaN	NaN	NaN	16.4205	16.7094	16.7156	16.9483	16.635	16.6138	16.7975	16.4656	16.6198	16.7739	16.8279
RSBN1	Round spermatid basic protein 1	44	HAGVSPRGVKRQRRSSSGGSQEKRGRPSQEP	RSS(0.999)SGGSQEK	1	21.1221	21.4179	21.335	21.1863	21.3371	20.4827	21.1744	21.2532	21.4276	21.2679	21.2022	21.3982	21.1779	21.1992	21.0309	21.1984	21.1309	21.4466	21.4863	21.7323	21.6104	21.7211	21.3559	21.4105	21.5246	21.4559	21.4183	21.3967	21.4545	21.4685	21.3086	21.4386	21.4154	22.0069	21.722	21.907	21.9251	21.9152	22.0317	21.9987	22.1004	22.1189	22.148	22.0901
RSBN1	Round spermatid basic protein 1	45	AGVSPRGVKRQRRSSSGGSQEKRGRPSQEPP	RSS(0.259)S(0.729)GGS(0.012)QEK	1	NaN	NaN	NaN	NaN	NaN	NaN	NaN	NaN	NaN	NaN	NaN	14.5616	14.5811	14.6039	14.8727	14.8706	14.2207	14.3767	14.8073	14.7887	14.6187	14.7367	NaN	NaN	NaN	NaN	NaN	NaN	NaN	NaN	NaN	NaN	NaN	19.8489	19.7657	20.1241	19.9042	19.9758	20.039	19.9781	19.9499	19.9781	19.9859	20.0782
RSBN1	Round spermatid basic protein 1	499	VRPGEQMIPTADMPKSPFKRRRSMNEIKNLQ	SQSDDGPIMWVRPGEQMIPTADMPKS(1)PFK	1	19.8342	20.4735	20.3572	20.3527	20.3423	19.4324	20.3071	20.1882	20.6062	20.1924	20.3443	19.7651	20.1602	19.989	20.1729	20.1568	19.3175	20.1675	19.7819	20.164	20.1357	20.1865	18.1927	18.3977	18.3874	18.5106	18.2944	18.4069	18.4938	18.3789	18.2652	18.6946	18.3003	18.6112	18.9656	19.0767	18.7772	18.8204	18.7153	19.0224	18.6044	18.8001	19.114	18.8758
THOC1	THO complex subunit 1	560	DEDEEDNDALLKENESPDVRRDKPVTGEQIE	ENES(1)PDVRRDK	1	23.5234	23.3882	23.3324	23.3084	23.3081	23.4694	23.6432	23.396	23.3917	23.567	23.3821	22.2668	22.1411	22.1197	22.1744	22.1361	22.2541	22.3712	22.1059	22.1275	22.2561	22.048	22.7592	22.5142	22.478	22.5326	22.338	22.79	22.692	22.5057	22.3226	22.6657	22.4002	21.8373	21.6773	21.8125	21.7492	21.5286	21.9789	21.8779	21.6791	21.5209	21.9156	21.6808
THOC1	THO complex subunit 1	2	______________MSPTPPLFSLPEARTRF	MS(0.998)PT(0.002)PPLFSLPEAR	1	17.4827	17.6792	17.4414	17.735	17.2657	17.8633	17.7577	17.1925	17.7323	17.596	17.2787	17.9731	17.6241	17.9267	17.78	18.1339	18.4127	18.1134	18.0594	18.1361	17.95	17.8541	17.5417	17.6071	17.4287	17.517	17.2069	17.5391	17.4575	17.1458	17.1932	17.3691	17.064	17.4397	17.9251	17.7481	17.7586	17.6417	17.932	17.6849	17.8582	17.7035	17.8316	17.4401
TMEM237	Transmembrane protein 237	62	SASLEGLAQTAGRRPSEGNEPSTKELKEHPE	NTPASASLEGLAQTAGRRPS(1)EGNEPSTK	1	18.9634	18.9997	18.9386	19.021	18.9293	19.156	19.2817	19.1343	19.1581	19.2757	19.0057	18.52	18.7843	18.3836	18.5767	18.5642	18.6556	19.06	18.9743	18.9727	18.8351	18.5435	17.6833	17.7951	18.1079	17.6218	17.6482	17.9164	18.1162	17.9081	17.8098	17.7609	17.8564	19.5518	19.5113	19.5562	19.375	19.1541	19.5058	19.6151	19.6869	19.3482	19.3552	19.5992
STX4	Syntaxin-4	14	__MRDRTHELRQGDDSSDEEDKERVALVVHP	QGDDS(1)S(1)DEEDK	1;2	NaN	NaN	NaN	NaN	NaN	NaN	NaN	NaN	NaN	NaN	NaN	NaN	NaN	NaN	NaN	NaN	NaN	NaN	NaN	NaN	NaN	NaN	18.6513	20.482	21.2193	20.6401	20.1857	18.0059	18.3118	18.2812	18.3745	18.3985	18.1857	NaN	NaN	NaN	NaN	NaN	NaN	NaN	NaN	NaN	NaN	NaN
STX4	Syntaxin-4	15	_MRDRTHELRQGDDSSDEEDKERVALVVHPG	QGDDS(1)S(1)DEEDK	1;2	NaN	NaN	NaN	NaN	NaN	NaN	NaN	NaN	NaN	NaN	NaN	NaN	NaN	NaN	NaN	NaN	NaN	NaN	NaN	NaN	NaN	NaN	18.6513	20.482	21.2193	20.6401	20.1857	18.0059	18.3118	18.2812	18.3745	18.3985	18.1857	NaN	NaN	NaN	NaN	NaN	NaN	NaN	NaN	NaN	NaN	NaN
STX4	Syntaxin-4	36	ERVALVVHPGTARLGSPDEEFFHKPSRSPSP	LGS(1)PDEEFFHK	1	16.7112	17.1055	16.8814	17.0367	16.7188	17.3419	16.6203	16.7036	17.0201	16.6941	16.4403	17.7405	18.3314	17.9517	17.7821	17.7874	21.5095	17.7478	17.9331	18.0811	17.6664	17.3764	16.9415	17.0424	17.1771	17.079	16.482	16.619	16.8927	16.687	16.6687	17.3024	16.499	17.9924	18.1348	18.2337	18.0719	17.712	17.6892	18.7993	17.2999	17.6531	19.459	17.3432
CABIN1	Calcineurin-binding protein cabin-1	20	AALNASSTIEDDHEGSFKSHKTQTKEAQEAE	IAALNASSTIEDDHEGS(1)FK	1;3	NaN	NaN	NaN	NaN	NaN	NaN	NaN	NaN	NaN	NaN	NaN	NaN	NaN	NaN	NaN	NaN	NaN	NaN	NaN	NaN	NaN	NaN	NaN	NaN	NaN	NaN	NaN	NaN	NaN	NaN	NaN	NaN	NaN	16.9789	18.043	18.3345	17.9336	17.7712	17.5376	17.4552	17.6031	17.8068	17.9646	17.498
CABIN1	Calcineurin-binding protein cabin-1	383	LPSRLRKLDPEEEDDSFNNYEVQSEAKLESF	KLDPEEEDDS(1)FNNYEVQSEAK	1	18.6952	18.7572	18.6868	18.6369	18.7188	18.7126	18.724	18.4439	18.5952	18.7043	18.2863	18.508	18.245	18.2817	18.3063	18.2388	17.9923	18.3486	18.0725	18.3991	18.3282	18.4236	NaN	NaN	NaN	NaN	NaN	NaN	NaN	NaN	NaN	NaN	NaN	NaN	NaN	NaN	NaN	NaN	NaN	NaN	NaN	NaN	NaN	NaN
CABIN1	Calcineurin-binding protein cabin-1	2044	DGEAQEAASETQPLSSPPTAASSKAPSSGSA	RDGEAQEAASETQPLS(0.004)S(0.996)PPTAASSK	1	NaN	NaN	NaN	NaN	NaN	NaN	NaN	NaN	NaN	NaN	NaN	17.6951	17.6446	17.614	17.56	17.5312	17.6432	17.77	17.597	17.7835	17.4759	17.361	NaN	NaN	NaN	NaN	NaN	NaN	NaN	NaN	NaN	NaN	NaN	NaN	NaN	NaN	NaN	NaN	NaN	NaN	NaN	NaN	NaN	NaN
CABIN1	Calcineurin-binding protein cabin-1	1690	VGLLNHRPVAMDAGDSADQSGERKDKESPRA	VGLLNHRPVAMDAGDS(1)ADQSGERK	1	18.6918	18.2375	18.593	18.6497	18.5067	18.2687	18.5559	18.3395	18.4754	18.7202	18.5539	NaN	NaN	NaN	NaN	NaN	NaN	NaN	NaN	NaN	NaN	NaN	NaN	NaN	NaN	NaN	NaN	NaN	NaN	NaN	NaN	NaN	NaN	NaN	NaN	NaN	NaN	NaN	NaN	NaN	NaN	NaN	NaN	NaN
DNAJB14	DnaJ homolog subfamily B member 14	63	KNGSTAGNSPHCRKPSGSGDQSKPNCTKDST	KPS(0.99)GS(0.01)GDQSK	1	NaN	NaN	NaN	NaN	NaN	NaN	NaN	NaN	NaN	NaN	NaN	18.359	18.6249	18.768	18.6969	18.6563	17.7935	18.7605	18.6685	18.4885	18.5901	18.6262	NaN	NaN	NaN	NaN	NaN	NaN	NaN	NaN	NaN	NaN	NaN	NaN	NaN	NaN	NaN	NaN	NaN	NaN	NaN	NaN	NaN	NaN
PRDM11	PR domain-containing protein 11	29	AAVGDMVTVVKTEVCSPLRDQEYGQPCSRRP	TEVCS(1)PLRDQEYGQPCSR	1	NaN	NaN	NaN	NaN	NaN	NaN	NaN	NaN	NaN	NaN	NaN	NaN	NaN	NaN	NaN	NaN	NaN	NaN	NaN	NaN	NaN	NaN	17.1004	17.2405	17.1418	17.0765	17.029	17.3016	17.3991	17.1333	17.0933	17.4037	16.9969	NaN	NaN	NaN	NaN	NaN	NaN	NaN	NaN	NaN	NaN	NaN
IQCE	IQ domain-containing protein E	306	ENQSLKEDLDRVLSTSPTISKTQGYVEWSKP	EDLDRVLS(0.001)T(0.002)S(0.991)PT(0.006)ISK	1	17.3647	17.5267	17.6112	17.9082	17.5848	17.279	18.031	17.6704	18.2991	18.101	17.8317	NaN	NaN	NaN	NaN	NaN	NaN	NaN	NaN	NaN	NaN	NaN	18.232	18.1082	18.1545	18.0837	17.9432	18.464	18.256	18.3368	18.2152	17.996	18.1738	19.8901	19.9175	19.9067	19.8838	19.8053	20.1053	19.9947	20.153	19.7495	19.758	20.1529
MLH1	DNA mismatch repair protein Mlh1	147	GSSDKVYAHQMVRTDSREQKLDAFLQPLSKP	T(0.009)DS(0.991)REQK	1	18.5516	17.6484	17.9453	18.188	18.0613	17.8577	18.4408	18.5931	18.4987	18.7368	18.3405	NaN	NaN	NaN	NaN	NaN	NaN	NaN	NaN	NaN	NaN	NaN	17.0258	16.2058	16.4603	16.5923	16.3672	17.0147	17.031	17.0369	16.7663	16.9944	16.7173	20.3843	20.2308	19.3978	19.5693	20.2319	20.566	20.3343	19.6272	19.6334	19.7645	19.7001
ADRM1	Proteasomal ubiquitin receptor ADRM1	405	KEGDTKDKKDEEEDMSLD_____________	DKKDEEEDMS(1)LD	1	21.0239	20.6331	20.5551	20.7025	20.7956	21.3075	21.172	20.8273	21.1624	21.1926	20.9702	22.9319	22.3652	22.451	22.5866	22.6684	23.0925	23.0157	22.6147	23.0835	23.0432	22.7271	21.6237	21.0663	20.9936	21.0095	21.062	21.455	21.5531	21.337	21.3307	21.7756	21.1807	23.4942	22.6952	22.7551	22.8611	22.8455	23.2605	23.3636	23.0881	23.1639	23.3585	22.9724
SAMD11	Sterile alpha motif domain-containing protein 11	344	RLWAQDGSEDEPPKDSDGEDPETAAVGCRGP	LWAQDGSEDEPPKDS(1)DGEDPETAAVGCR	1;2	18.9553	19.0188	18.8818	19.0861	19.029	19.2383	19.3308	19.0387	19.4451	19.0325	19.1706	19.0751	18.7939	18.7321	18.7808	18.7244	18.884	18.8645	18.9755	19.1378	19.056	19.0473	17.1676	17.0978	17.0636	16.5049	16.9275	17.3324	17.7185	16.7252	16.7184	17.0998	16.9147	20.1795	19.39	19.6044	19.4867	19.4366	19.7177	19.9787	19.6772	19.2985	19.7	19.4333
SAMD11	Sterile alpha motif domain-containing protein 11	154	RISSDCFSEKRARSESPQAEALLLPRELGPS	RARS(1)ES(1)PQAEALLLPR	1;2	NaN	NaN	NaN	NaN	NaN	NaN	NaN	NaN	NaN	NaN	NaN	NaN	NaN	NaN	NaN	NaN	NaN	NaN	NaN	NaN	NaN	NaN	17.0705	16.6303	16.5698	16.5595	16.6784	17.2913	17.2544	17.1228	16.9483	17.1342	17.0973	17.7041	17.3066	17.3409	17.3916	17.1007	17.7533	18.0051	17.5408	17.607	17.5584	17.3315
FMR1		10	______DDGQGMGRGSRPYRNRGHGRRGPGY	DDGQGMGRGS(1)R	1	18.1588	17.8303	18.1156	18.4895	18.6422	18.5851	18.6599	19.0397	18.3778	18.8826	18.7321	NaN	NaN	NaN	NaN	NaN	NaN	NaN	NaN	NaN	NaN	NaN	17.5201	17.5088	17.7139	17.8402	17.7698	18.3976	17.9257	18.0038	17.8157	18.1456	17.9399	NaN	NaN	NaN	NaN	NaN	NaN	NaN	NaN	NaN	NaN	NaN
SLC9A7	Sodium/hydrogen exchanger;Sodium/hydrogen exchanger 7	694	SHTASTSLEGSRRTKSSSEEVLERDLGMGDQ	S(0.961)S(0.037)S(0.002)EEVLERDLGMGDQK	1	NaN	NaN	NaN	NaN	NaN	NaN	NaN	NaN	NaN	NaN	NaN	17.7607	16.8455	16.6549	16.7686	17.0851	16.3802	17.2252	17.3641	16.8618	17.6078	16.7881	NaN	NaN	NaN	NaN	NaN	NaN	NaN	NaN	NaN	NaN	NaN	NaN	NaN	NaN	NaN	NaN	NaN	NaN	NaN	NaN	NaN	NaN
RPUSD2	RNA pseudouridylate synthase domain-containing protein 2	35	HQQNGDAGGDAKVELSPGPPKPAGREVEPAP	VELS(1)PGPPKPAGR	1	21.8008	22.1486	21.9675	21.8612	21.7009	20.7086	22.0208	21.6564	21.9025	21.7778	21.8164	22.8164	23.1393	22.9047	22.9615	22.7928	21.8408	23.0234	22.5394	22.9503	22.7804	22.692	22.1635	22.139	22.0132	21.9697	21.7634	22.2437	21.7378	21.8549	21.7525	21.1184	21.809	23.0284	23.0461	22.8737	22.8638	22.6837	23.2021	22.6941	22.8254	22.5633	21.7449	22.6144
ZCCHC17	Nucleolar protein of 40 kDa	114	DPNNVIIEQEERRRRSFQDYTGQKITLEAVL	S(0.999)FQDYT(0.001)GQK	1	18.9237	19.7552	19.1915	19.2548	18.8883	19.7047	19.2483	18.7673	19.153	19.3208	18.9304	NaN	NaN	NaN	NaN	NaN	NaN	NaN	NaN	NaN	NaN	NaN	16.6725	17.0723	16.257	16.5693	16.2654	16.7985	16.7332	16.5496	16.2127	16.5715	16.0296	NaN	NaN	NaN	NaN	NaN	NaN	NaN	NaN	NaN	NaN	NaN
FAM83D	Protein FAM83D	488	QTDMDENILFPRGTQSTEGSPVSKMSVSRSS	GTQS(0.996)T(0.026)EGS(0.978)PVSK	1;2	NaN	NaN	NaN	NaN	NaN	NaN	NaN	NaN	NaN	NaN	NaN	17.6859	17.4552	17.4946	17.4842	17.7638	17.4306	17.4958	17.4893	17.4437	17.4419	17.5778	NaN	NaN	NaN	NaN	NaN	NaN	NaN	NaN	NaN	NaN	NaN	17.8534	18.3702	18.1049	18.5122	18.132	17.4232	17.9069	18.0222	17.8599	18.0585	17.8251
FAM83D	Protein FAM83D	492	DENILFPRGTQSTEGSPVSKMSVSRSSSLKS	GTQSTEGS(1)PVSK	1;2	21.0731	22.1414	22.1689	21.9125	21.8255	20.5951	20.9954	20.8425	21.0641	20.8015	20.7991	21.4725	22.71	22.8185	22.4293	22.3254	21.1805	21.6414	21.4865	21.6005	21.3427	21.4116	19.76	20.7082	20.7372	20.4765	20.386	19.6903	19.6066	19.6528	19.5938	19.5054	19.5877	21.5352	22.6863	22.7796	22.476	22.2107	21.4824	21.5046	21.2122	21.3471	21.4484	21.2494
FAM83D	Protein FAM83D	495	ILFPRGTQSTEGSPVSKMSVSRSSSLKSSSS	GT(0.003)QS(0.973)T(0.025)EGS(0.316)PVS(0.683)K	1;2	NaN	NaN	NaN	NaN	NaN	NaN	NaN	NaN	NaN	NaN	NaN	NaN	NaN	NaN	NaN	NaN	NaN	NaN	NaN	NaN	NaN	NaN	NaN	NaN	NaN	NaN	NaN	NaN	NaN	NaN	NaN	NaN	NaN	NaN	NaN	NaN	NaN	NaN	NaN	NaN	NaN	NaN	NaN	NaN
FAM83D	Protein FAM83D	399	GKAERKPHDCESSTVSEEDYFSSHRDELQSR	KPHDCESST(0.001)VS(0.999)EEDYFSSHRDELQSR	1;2;3	NaN	NaN	NaN	NaN	NaN	NaN	NaN	NaN	NaN	NaN	NaN	NaN	NaN	NaN	NaN	NaN	NaN	NaN	NaN	NaN	NaN	NaN	NaN	NaN	NaN	NaN	NaN	NaN	NaN	NaN	NaN	NaN	NaN	19.8581	20.0969	19.7718	19.7996	19.4656	19.8029	19.6122	19.6487	19.5301	19.5343	19.5604
FAM83D	Protein FAM83D	523	SSSVSSQGSVASSTGSPASIRTTDFHNPGYP	SSSSVSSQGSVASSTGS(0.999)PAS(0.001)IR	1	NaN	NaN	NaN	NaN	NaN	NaN	NaN	NaN	NaN	NaN	NaN	16.7056	17.6178	17.7947	17.1544	16.8032	17.188	17.0121	16.6579	17.3958	16.8675	16.8953	16.8687	17.4546	17.2735	16.8918	16.7427	17.0608	16.6929	16.6885	16.6096	16.6733	16.7586	16.3799	17.1495	16.9591	16.7013	16.6695	16.8697	16.7341	16.4269	16.5473	16.6284	16.5104
POLQ	DNA polymerase theta	1722	NVDIFPVQEKNHTVVSPRALELSDPVLDEHH	NHTVVS(1)PR	1	NaN	NaN	NaN	NaN	NaN	NaN	NaN	NaN	NaN	NaN	NaN	18.0995	18.3247	18.1826	18.1982	18.2413	18.0172	18.1501	17.9578	18.2871	18.2612	18.0386	NaN	NaN	NaN	NaN	NaN	NaN	NaN	NaN	NaN	NaN	NaN	16.3472	16.0842	16.334	16.2239	15.9609	16.1194	16.0792	16.2536	16.1628	16.5055	16.2284
RPL17;RPL17-C18orf32	60S ribosomal protein L17	141	RRRTYRAHGRINPYMSSPCHIEMILTEKEQI	INPYMS(0.906)S(0.094)PCHIEMILTEK	1	19.9977	20.1062	20.1322	20.1296	20.1509	20.1326	20.0572	19.9708	20.2272	19.9398	20.0109	22.5907	22.8163	22.8086	22.7202	22.7749	22.6986	22.5874	22.6635	22.7498	22.5088	22.5887	20.4398	20.5535	20.3797	20.3605	20.3616	20.3703	20.2864	20.3817	20.151	20.2896	20.3264	23.6903	23.9757	23.4904	23.604	23.5252	23.6952	23.5036	23.7039	23.4147	23.6322	23.5284
RPL17;RPL17-C18orf32	60S ribosomal protein L17	142	RRTYRAHGRINPYMSSPCHIEMILTEKEQIV	INPYMS(0.002)S(0.998)PCHIEMILTEK	1	22.4841	22.7486	22.7136	22.5726	22.6384	22.5751	22.5126	22.5461	22.735	22.3614	22.4094	23.2559	23.4016	23.4718	23.3498	23.2914	23.3386	23.2698	23.1855	23.3613	23.0065	23.2265	22.8116	23.007	22.7972	22.7424	22.7244	22.8465	22.605	22.8169	22.5086	22.6709	22.6775	22.1696	22.3934	21.8744	22.0492	22.0968	22.1701	21.9188	22.1181	21.811	21.9748	21.9314
RPL17;RPL17-C18orf32	60S ribosomal protein L17	5	___________MVRYSLDPENPTKSCKSRGS	VRYS(1)LDPENPTK	1	18.3732	18.4712	18.4343	18.4885	18.3792	18.4591	18.4121	17.9554	18.1969	18.5735	18.1856	20.8899	20.6725	20.6123	20.7946	20.7996	21.8291	21.0614	20.694	20.8854	21.1379	20.7707	19.1492	19.1263	18.9378	18.9236	18.8581	19.3077	18.9866	18.9033	18.8877	19.3805	18.7689	20.647	20.3273	20.3794	20.3161	20.165	20.7089	20.3474	20.3077	20.2094	20.5763	20.193
INTS12	Integrator complex subunit 12	128	DIPKKPRLEKPETQSSPITVQSSKDLPMADL	LEKPET(0.004)QS(0.07)S(0.924)PIT(0.002)VQSSK	1	18.0324	18.6422	18.2086	18.3362	18.0821	18.7596	18.3278	17.9762	18.6026	18.2009	18.2905	19.6957	20.4119	19.9396	19.774	19.6298	20.4307	19.9795	19.6874	19.7437	19.5234	19.7409	NaN	NaN	NaN	NaN	NaN	NaN	NaN	NaN	NaN	NaN	NaN	NaN	NaN	NaN	NaN	NaN	NaN	NaN	NaN	NaN	NaN	NaN
INTS12	Integrator complex subunit 12	376	KPPPPLTLGKTGLSRSVSCDNVSKVGLPSPS	S(0.858)VS(0.139)CDNVS(0.003)K	1	NaN	NaN	NaN	NaN	NaN	NaN	NaN	NaN	NaN	NaN	NaN	NaN	NaN	NaN	NaN	NaN	NaN	NaN	NaN	NaN	NaN	NaN	NaN	NaN	NaN	NaN	NaN	NaN	NaN	NaN	NaN	NaN	NaN	NaN	NaN	NaN	NaN	NaN	NaN	NaN	NaN	NaN	NaN	NaN
INTS12	Integrator complex subunit 12	378	PPPLTLGKTGLSRSVSCDNVSKVGLPSPSSL	SVS(1)CDNVSK	1	20.3568	20.3315	20.294	20.3818	20.253	19.9528	20.3685	20.0011	20.3401	20.1562	20.2126	20.3696	20.1911	20.1386	20.4413	20.1118	20.3922	20.5405	20.1655	20.6539	20.3264	20.2215	20.4983	20.3183	20.4831	20.4386	20.1478	20.2371	20.3726	20.5439	20.3064	20.4866	20.3174	22.3814	22.185	22.4361	22.2574	21.9943	22.4881	22.3347	22.5048	22.4672	22.5375	22.4622
INTS12	Integrator complex subunit 12	427	PSGSTTSKTTSESSSSPSASLKGPTSQNHSS	TTSESSS(0.013)S(0.987)PSASLK	1	NaN	NaN	NaN	NaN	NaN	NaN	NaN	NaN	NaN	NaN	NaN	20.614	21.8118	21.2138	21.202	20.7795	21.3011	21.0713	20.0474	20.7467	20.5146	20.3313	NaN	NaN	NaN	NaN	NaN	NaN	NaN	NaN	NaN	NaN	NaN	20.9637	21.6389	20.6874	20.8624	20.3678	21.1854	20.8549	20.226	20.5751	20.6817	19.9398
INTS12	Integrator complex subunit 12	389	SRSVSCDNVSKVGLPSPSSLVPGSSSQLSGN	VGLPS(0.741)PS(0.122)S(0.122)LVPGS(0.005)S(0.005)S(0.005)QLS(0.001)GNGNSGTSGPSGSTTSK	1	NaN	NaN	NaN	NaN	NaN	NaN	NaN	NaN	NaN	NaN	NaN	NaN	NaN	NaN	NaN	NaN	NaN	NaN	NaN	NaN	NaN	NaN	NaN	NaN	NaN	NaN	NaN	NaN	NaN	NaN	NaN	NaN	NaN	NaN	NaN	NaN	NaN	NaN	NaN	NaN	NaN	NaN	NaN	NaN
MTSS1L	MTSS1-like protein	299	AKGGGAPWPGGAQTYSPSSTCRYRSLAQPAT	GGGAPWPGGAQTYS(0.998)PS(0.001)STCR	1	NaN	NaN	NaN	NaN	NaN	NaN	NaN	NaN	NaN	NaN	NaN	NaN	NaN	NaN	NaN	NaN	NaN	NaN	NaN	NaN	NaN	NaN	15.7783	16.0478	16.0194	15.8704	15.6658	15.9018	15.919	15.7451	15.8238	15.7585	15.4424	19.4576	19.5483	19.4892	19.5228	19.4892	19.7906	19.3406	19.4803	19.4133	19.2385	19.3381
MTSS1L	MTSS1-like protein	455	SPAASDLAMVLTRGLSLEHQKSSRDSLQYSS	GLS(1)LEHQK	1	NaN	NaN	NaN	NaN	NaN	NaN	NaN	NaN	NaN	NaN	NaN	21.4612	21.4394	21.686	21.5438	21.4682	20.9917	21.3303	21.1764	21.2095	21.2275	21.1774	NaN	NaN	NaN	NaN	NaN	NaN	NaN	NaN	NaN	NaN	NaN	19.9535	19.9398	20.1971	20.0192	19.919	19.9836	20.0111	19.9902	19.6859	20.0356	19.8289
MTSS1L	MTSS1-like protein	262	DLKGSDYSWSYQTPPSSPSSSSSRKSSMCSA;DLKGSDYSWSYQTPPSSPSSSSSRKSSMCSL	GSDYSWSYQT(0.078)PPS(0.524)S(0.392)PS(0.001)S(0.001)S(0.001)S(0.001)S(0.001)RK	1;2	NaN	NaN	NaN	NaN	NaN	NaN	NaN	NaN	NaN	NaN	NaN	NaN	NaN	NaN	NaN	NaN	NaN	NaN	NaN	NaN	NaN	NaN	NaN	NaN	NaN	NaN	NaN	NaN	NaN	NaN	NaN	NaN	NaN	17.672	18.0353	18.0411	18.1277	17.8953	17.468	17.5936	17.9251	17.5495	17.548	17.5746
MTSS1L	MTSS1-like protein	272	YQTPPSSPSSSSSRKSSMCSAPSSSSSAKGG	S(0.56)S(0.44)MCSAPSSSSSAK	1	NaN	NaN	NaN	NaN	NaN	NaN	NaN	NaN	NaN	NaN	NaN	NaN	NaN	NaN	NaN	NaN	NaN	NaN	NaN	NaN	NaN	NaN	NaN	NaN	NaN	NaN	NaN	NaN	NaN	NaN	NaN	NaN	NaN	NaN	NaN	NaN	NaN	NaN	NaN	NaN	NaN	NaN	NaN	NaN
MTSS1L	MTSS1-like protein	427	GTLGPSGEEAPRPRMSPATIAAKHGEEVSPA	MS(1)PATIAAK	1	NaN	NaN	NaN	NaN	NaN	NaN	NaN	NaN	NaN	NaN	NaN	18.8509	19.8472	19.2879	19.2843	19.1124	19.196	19.2087	18.5909	19.146	18.8058	18.9377	18.2478	18.3247	18.2281	18.0549	17.8822	18.2014	18.3616	17.8033	17.8066	18.2074	17.6358	19.3332	19.6352	19.5951	19.3004	19.0727	19.4033	19.4768	18.9678	19.086	19.2611	18.8259
MTSS1L	MTSS1-like protein	638	SPLAPDLAKASPKRLSLPNTAWGSPSPEAAG	RLS(1)LPNTAWGSPSPEAAGYPGAGAEDEQQQLAANR	1	NaN	NaN	NaN	NaN	NaN	NaN	NaN	NaN	NaN	NaN	NaN	NaN	NaN	NaN	NaN	NaN	NaN	NaN	NaN	NaN	NaN	NaN	NaN	NaN	NaN	NaN	NaN	NaN	NaN	NaN	NaN	NaN	NaN	16.6211	16.4518	16.3337	16.5399	16.6132	16.5069	16.4193	16.5196	15.8581	16.6112	16.3671
MTSS1L	MTSS1-like protein	646	KASPKRLSLPNTAWGSPSPEAAGYPGAGAED	RLS(0.076)LPNT(0.105)AWGS(0.673)PS(0.145)PEAAGY(0.001)PGAGAEDEQQQLAANR	1	NaN	NaN	NaN	NaN	NaN	NaN	NaN	NaN	NaN	NaN	NaN	NaN	NaN	NaN	NaN	NaN	NaN	NaN	NaN	NaN	NaN	NaN	16.1917	15.9626	16.0932	16.4818	16.315	16.4602	16.8559	16.5782	16.2729	16.2741	16.4619	NaN	NaN	NaN	NaN	NaN	NaN	NaN	NaN	NaN	NaN	NaN
MTSS1L	MTSS1-like protein	600	IRPPIVPVKTPTVPDSPGYMGPTRAGSEECV	TPTVPDS(1)PGYMGPTR	1	17.6758	18.0401	18.0609	17.7252	17.9323	17.5921	17.2496	17.4244	17.3598	17.4524	17.4698	NaN	NaN	NaN	NaN	NaN	NaN	NaN	NaN	NaN	NaN	NaN	17.2857	18.0199	18.1672	17.7977	17.7033	17.5991	17.5147	17.6031	17.0643	17.6871	16.9942	18.4382	18.8854	18.9268	18.7884	18.6232	18.3975	18.5259	18.5145	18.4214	18.5779	18.0255
PAX1	Paired box protein Pax-1	261	LPYNHIYQYPYPSPVSPTGAKMGSHPGVPGT	QPPSQPTLPYNHIYQYPYPS(0.006)PVS(0.943)PT(0.05)GAK	1	NaN	NaN	NaN	NaN	NaN	NaN	NaN	NaN	NaN	NaN	NaN	16.2234	17.5004	16.7815	16.5236	16.6637	16.8165	16.5278	16.7066	16.7586	16.1666	16.8849	NaN	NaN	NaN	NaN	NaN	NaN	NaN	NaN	NaN	NaN	NaN	15.9499	16.0491	15.7431	15.3042	15.1937	15.445	15.3826	15.6114	15.901	15.4702	15.2313
OTUD5	OTU domain-containing protein 5	421	SSATAAASSGLEEWTSRSPRQRSSASSPEHP	ASATCSSATAAASSGLEEWT(0.195)S(0.69)RS(0.115)PRQR	1	16.5389	17.1941	16.7439	16.8073	16.7	16.6348	16.9961	16.6815	16.8177	16.9579	16.8282	NaN	NaN	NaN	NaN	NaN	NaN	NaN	NaN	NaN	NaN	NaN	NaN	NaN	NaN	NaN	NaN	NaN	NaN	NaN	NaN	NaN	NaN	NaN	NaN	NaN	NaN	NaN	NaN	NaN	NaN	NaN	NaN	NaN
OTUD5	OTU domain-containing protein 5	423	ATAAASSGLEEWTSRSPRQRSSASSPEHPEL	ASATCSSATAAASSGLEEWTSRS(1)PR	1	18.2541	18.829	18.8664	18.7564	18.9069	18.2284	18.7604	18.7282	18.9078	18.7519	19.0488	20.5713	21.0659	21.1978	21.2724	21.3002	22.7213	21.374	21.296	21.6057	21.3125	21.4554	19.3996	19.5249	19.6251	19.5746	19.4275	19.6073	19.6656	19.9195	19.6121	19.7341	19.7786	20.5704	20.4965	20.4621	20.3562	20.2666	20.2929	20.5776	20.6795	20.7087	20.5951	20.6708
OTUD5	OTU domain-containing protein 5	40	DRDRDSGVVGARPRASPPPQGPLPGPPGALH	AS(1)PPPQGPLPGPPGALHR	1	18.6651	19.0408	18.9934	19.2461	19.1234	19.1848	18.9796	18.886	19.34	19.1131	19.1653	19.4827	19.752	19.71	19.6904	19.879	20.1367	19.6821	19.8219	19.7819	19.6982	19.7408	18.5225	18.7713	18.9361	18.7443	18.5751	18.6541	18.8607	18.8997	18.5988	18.8064	18.6507	19.9718	20.2419	20.306	20.1026	19.8911	20.0689	20.2223	20.0685	19.7025	20.1265	19.9948
OTUD5	OTU domain-containing protein 5	479	PGTSSQFSAGADRATSPLVSLYPALECRALI	ATS(1)PLVSLYPALECR	1	20.1483	20.4824	20.6515	20.6522	20.6105	20.9568	20.7409	20.6829	20.8182	20.6099	20.8656	19.8048	20.0754	20.0679	20.2094	20.196	20.2771	20.2848	20.2255	20.1383	19.9505	20.4484	20.2339	20.1057	20.284	20.3079	20.1307	20.2439	20.6126	20.379	20.0778	20.3151	20.249	21.4045	21.1736	21.4515	21.4722	21.3945	21.5855	21.8005	21.5947	21.2193	21.5552	21.3213
OTUD5	OTU domain-containing protein 5	141	KRRRQAPGVGAVGGGSPEREEVGAGYNSEDE	QAPGVGAVGGGS(1)PEREEVGAGYNSEDEYEAAAAR	1;2	18.7714	20.3835	20.3632	20.1206	19.9827	18.9707	19.3716	19.2315	19.4616	19.3223	19.3645	18.6262	20.3547	20.3462	19.9347	20.1268	18.792	18.7725	19.0247	18.6374	18.8879	19.0243	18.8966	20.0048	20.1624	19.7934	19.6181	19.2273	19.1393	19.418	19.0899	19.1398	19.2276	18.3353	19.7193	19.7741	19.6359	19.3722	18.2324	18.6414	18.6501	18.3967	18.2251	18.648
OTUD5	OTU domain-containing protein 5	153	GGGSPEREEVGAGYNSEDEYEAAAARIEAMD	QAPGVGAVGGGSPEREEVGAGYNS(1)EDEYEAAAAR	1;2	17.9495	17.2766	17.872	17.78	17.9479	17.5952	18.2106	18.1255	18.4648	18.459	18.6108	17.3341	17.0931	17.4111	17.7839	17.4349	17.6048	18.0781	17.9249	18.0877	17.8524	18.2061	17.293	16.8636	16.9901	17.2571	17.0651	17.4619	17.3005	17.6186	17.0919	17.3309	17.4344	16.7598	16.159	15.5603	16.4081	16.4892	16.8568	17.157	16.5162	17.0192	17.0208	16.9648
PRKAA2	5'-AMP-activated protein kinase catalytic subunit alpha-2	345	NRRIMNQASEFYLASSPPSGSFMDDSAMHIP	IMNQASEFYLAS(0.011)S(0.963)PPS(0.009)GS(0.009)FMDDS(0.009)AMHIPPGLKPHPER	1	NaN	NaN	NaN	NaN	NaN	NaN	NaN	NaN	NaN	NaN	NaN	18.0599	18.485	18.4504	18.2114	18.0403	18.6464	18.2463	18.1075	18.1306	17.7297	17.8071	NaN	NaN	NaN	NaN	NaN	NaN	NaN	NaN	NaN	NaN	NaN	19.4546	19.7643	19.5591	19.5437	19.5059	19.5107	19.4767	19.362	19.1173	19.4749	19.1538
PRKAA2	5'-AMP-activated protein kinase catalytic subunit alpha-2	377	GLKPHPERMPPLIADSPKARCPLDALNTTKP	MPPLIADS(1)PK	1	18.9212	19.4193	19.3764	19.4408	19.305	19.4748	19.3399	18.9392	19.1247	19.2922	19.1787	19.7068	20.0589	20.0083	20.0776	19.7768	20.0133	19.9147	19.3381	19.5634	19.6614	19.4533	18.3712	18.5215	18.6848	18.3467	18.1554	18.3248	18.6691	18.0188	18.0077	18.3678	17.8499	19.3905	19.7719	20.1416	19.7781	19.2536	19.6673	19.9259	19.3318	18.9966	19.3724	19.243
PRKAA2	5'-AMP-activated protein kinase catalytic subunit alpha-2	489	DEVVEQRSGSSTPQRSCSAAGLHRPRSSFDS	S(0.5)CS(0.5)AAGLHRPR	1	NaN	NaN	NaN	NaN	NaN	NaN	NaN	NaN	NaN	NaN	NaN	NaN	NaN	NaN	NaN	NaN	NaN	NaN	NaN	NaN	NaN	NaN	NaN	NaN	NaN	NaN	NaN	NaN	NaN	NaN	NaN	NaN	NaN	16.6448	17.0527	17.2864	17.0912	17.0051	16.7157	16.9548	17.0561	16.9095	17.1809	17.2248
PRKAA2	5'-AMP-activated protein kinase catalytic subunit alpha-2	491	VVEQRSGSSTPQRSCSAAGLHRPRSSFDSTT	S(0.229)CS(0.771)AAGLHRPR	1	NaN	NaN	NaN	NaN	NaN	NaN	NaN	NaN	NaN	NaN	NaN	NaN	NaN	NaN	NaN	NaN	NaN	NaN	NaN	NaN	NaN	NaN	16.3983	16.6109	16.7649	16.657	16.3478	16.4114	16.4522	16.5326	16.4771	16.6144	16.4964	16.6448	17.0527	17.2864	17.0912	17.0051	16.7157	16.9548	17.0561	16.9095	17.1809	17.2248
PRKAA2;PRKAA1	5'-AMP-activated protein kinase catalytic subunit alpha-2;5'-AMP-activated protein kinase catalytic subunit alpha-1	202	SNMMSDGEFLRTSCGSPNYAAPEVISGRLYA	TSCGS(0.999)PNYAAPEVISGR	1	NaN	NaN	NaN	NaN	NaN	NaN	NaN	NaN	NaN	NaN	NaN	NaN	NaN	NaN	NaN	NaN	NaN	NaN	NaN	NaN	NaN	NaN	NaN	NaN	NaN	NaN	NaN	NaN	NaN	NaN	NaN	NaN	NaN	18.0264	17.9163	18.2759	18.1197	17.8955	18.0802	18.2253	17.9558	17.6988	18.1501	17.72
HEATR6	HEAT repeat-containing protein 6	489	WKKAPAGPSLEETSVSSPKGSSEPCWLIRLC	APAGPSLEETS(0.002)VS(0.877)S(0.12)PK	1	NaN	NaN	NaN	NaN	NaN	NaN	NaN	NaN	NaN	NaN	NaN	NaN	NaN	NaN	NaN	NaN	NaN	NaN	NaN	NaN	NaN	NaN	NaN	NaN	NaN	NaN	NaN	NaN	NaN	NaN	NaN	NaN	NaN	20.2612	20.204	20.4909	20.1533	20.0815	20.5704	20.6568	20.281	20.4287	20.2764	20.4718
HEATR6	HEAT repeat-containing protein 6	490	KKAPAGPSLEETSVSSPKGSSEPCWLIRLCI	APAGPSLEETSVS(0.008)S(0.992)PK	1	18.2511	17.9863	17.7959	18.2127	18.116	18.3206	18.3297	18.5497	18.4066	18.6246	18.1577	19.984	19.9234	20.0469	20.0517	20.1079	19.9099	20.4963	20.4996	20.5275	20.3336	20.3085	17.613	17.322	17.6287	17.3787	17.2612	17.6952	17.8368	17.5437	17.6569	17.5064	17.6707	20.7346	20.8109	20.8351	20.7433	20.3687	20.938	21.0323	20.8095	20.6673	20.5098	20.776
HEATR6	HEAT repeat-containing protein 6	183	VKPKKIQQGEEEEKESSGEIEAAPVTGTGRV	KIQQGEEEEKES(0.973)S(0.027)GEIEAAPVTGTGR	1	NaN	NaN	NaN	NaN	NaN	NaN	NaN	NaN	NaN	NaN	NaN	NaN	NaN	NaN	NaN	NaN	NaN	NaN	NaN	NaN	NaN	NaN	19.7952	19.3827	19.3808	19.3245	19.2974	19.8814	20.1	20.0234	19.7738	20.1993	19.9023	20.121	19.7606	19.9485	19.8229	19.6148	20.1572	20.2535	20.0873	19.8611	20.0769	20.2226
HEATR6	HEAT repeat-containing protein 6	346	ILEGSKQFLSVAEDTSDHRRAFTPFSVMIAC	QFLSVAEDT(0.5)S(0.5)DHRR	1	NaN	NaN	NaN	NaN	NaN	NaN	NaN	NaN	NaN	NaN	NaN	NaN	NaN	NaN	NaN	NaN	NaN	NaN	NaN	NaN	NaN	NaN	NaN	NaN	NaN	NaN	NaN	NaN	NaN	NaN	NaN	NaN	NaN	16.7044	16.5177	16.8413	16.8509	16.4871	16.7227	16.7951	16.5886	16.5958	16.6923	16.668
MYO5A	Unconventional myosin-Va	600	FKMLPELFQDDEKAISPTSATSSGRTPLTRT	AIS(0.998)PT(0.002)SATSSGR	1	NaN	NaN	NaN	NaN	NaN	NaN	NaN	NaN	NaN	NaN	NaN	NaN	NaN	NaN	NaN	NaN	NaN	NaN	NaN	NaN	NaN	NaN	19.9868	19.518	19.5759	19.4427	19.5407	20.2041	20.1376	19.8953	19.6824	20.0613	19.7162	17.0392	17.1615	17.365	17.0838	16.9095	17.1734	17.0836	17.1822	16.8879	17.0984	17.1112
MYO5A	Unconventional myosin-Va	1624	QGVSGVKPTGLRKRTSSIADEGTYTLDSILR	T(0.008)S(0.637)S(0.355)IADEGTYTLDSILR	1	NaN	NaN	NaN	NaN	NaN	NaN	NaN	NaN	NaN	NaN	NaN	NaN	NaN	NaN	NaN	NaN	NaN	NaN	NaN	NaN	NaN	NaN	NaN	NaN	NaN	NaN	NaN	NaN	NaN	NaN	NaN	NaN	NaN	16.3615	15.8291	16.2169	15.7779	15.7633	16.4901	17.2918	16.491	16.031	17.2714	16.389
MYO5A	Unconventional myosin-Va	1625	GVSGVKPTGLRKRTSSIADEGTYTLDSILRQ	T(0.002)S(0.002)S(0.996)IADEGTYTLDSILR	1	17.528	17.3954	17.3198	17.4835	17.399	17.9653	17.7391	17.5026	17.6422	17.8891	17.7103	NaN	NaN	NaN	NaN	NaN	NaN	NaN	NaN	NaN	NaN	NaN	17.8182	17.5263	17.8964	17.8931	17.7439	18.202	18.0368	18.1161	18.0918	18.6186	18.2433	NaN	NaN	NaN	NaN	NaN	NaN	NaN	NaN	NaN	NaN	NaN
NEK3	Serine/threonine-protein kinase Nek3	84	NREEKGNKSVHLRKASSPNLHRRQWEKNVPN	AS(0.597)S(0.403)PNLHR	1	13.0293	12.0956	12.9538	12.5524	12.9425	12.6657	13.0099	13.195	12.7597	12.6707	12.9501	17.6833	17.8188	17.7259	17.7605	17.878	17.4057	17.7411	17.7367	17.754	17.5191	17.7522	NaN	NaN	NaN	NaN	NaN	NaN	NaN	NaN	NaN	NaN	NaN	19.5604	19.7374	19.6894	19.6998	19.4682	19.9104	19.524	19.5396	19.4545	19.1907	19.3867
NEK3	Serine/threonine-protein kinase Nek3	85	REEKGNKSVHLRKASSPNLHRRQWEKNVPNT	AS(0.002)S(0.998)PNLHRR	1	18.73	18.8719	18.7041	18.5482	18.836	17.7779	18.7138	18.7078	18.7103	18.5609	18.4914	17.6833	17.8188	17.7259	17.7605	17.878	17.4057	17.7411	17.7367	17.754	17.5553	17.7706	18.706	18.8894	18.6766	18.704	18.7102	18.8793	18.5256	18.7535	18.4663	18.5076	18.5315	19.5604	19.7374	19.6894	19.6998	19.4682	19.9104	19.524	19.5396	19.4545	19.1907	19.3867
NUMA1	Nuclear mitotic apparatus protein 1	169	APVPSTCSSTFPEELSPPSHQAKREIRFLEL	APVPSTCSSTFPEELS(1)PPSHQAK	1	22.7014	22.8879	22.7578	22.5912	22.659	22.3331	22.5657	22.489	22.6958	22.5101	22.5742	22.9655	23.334	23.2785	23.1538	23.0915	22.7955	23.1811	22.9993	23.2241	22.9184	23.0145	23.0249	22.8902	22.852	22.7623	22.7764	23.0104	22.7124	22.7289	22.5075	22.6664	22.7049	23.7823	23.7815	23.7126	23.6006	23.4205	23.7236	23.58	23.5161	23.3861	23.4937	23.4251
NUMA1	Nuclear mitotic apparatus protein 1	1853	TRSAPASQASLRATSSTQSLARLGSPDYGNS	ATS(0.025)S(0.971)T(0.004)QSLAR	1	18.0973	18.2336	17.9287	17.9229	17.8619	18.0185	17.9838	17.7978	17.8893	18.1229	17.834	19.2123	19.3603	19.0863	19.0964	18.9794	18.8793	19.0812	18.8433	18.9495	19.1575	18.792	NaN	NaN	NaN	NaN	NaN	NaN	NaN	NaN	NaN	NaN	NaN	18.8248	19.0094	18.6462	18.9567	18.5249	18.7991	18.7611	18.4027	18.4967	19.0032	18.4327
NUMA1	Nuclear mitotic apparatus protein 1	77	DFVCSFLQKNRKHPSSPECLVSAQKVLEGSE	HPS(0.175)S(0.825)PECLVSAQK	1	17.456	17.6875	17.5365	17.787	17.5857	18.1497	17.7041	17.6819	17.7739	17.9195	17.6514	NaN	NaN	NaN	NaN	NaN	NaN	NaN	NaN	NaN	NaN	NaN	NaN	NaN	NaN	NaN	NaN	NaN	NaN	NaN	NaN	NaN	NaN	NaN	NaN	NaN	NaN	NaN	NaN	NaN	NaN	NaN	NaN	NaN
NUMA1	Nuclear mitotic apparatus protein 1	1830	INITMTKKLDVEEPDSANSSFYSTRSAPASQ	KLDVEEPDS(0.996)ANS(0.003)S(0.001)FYSTR	1	NaN	NaN	NaN	NaN	NaN	NaN	NaN	NaN	NaN	NaN	NaN	20.1677	20.4628	20.1577	20.1963	20.102	20.8821	20.4703	19.8784	20.3479	20.205	19.9183	NaN	NaN	NaN	NaN	NaN	NaN	NaN	NaN	NaN	NaN	NaN	NaN	NaN	NaN	NaN	NaN	NaN	NaN	NaN	NaN	NaN	NaN
NUMA1	Nuclear mitotic apparatus protein 1	1834	MTKKLDVEEPDSANSSFYSTRSAPASQASLR	KLDVEEPDS(0.001)ANS(0.195)S(0.772)FYS(0.013)T(0.018)R	1	NaN	NaN	NaN	NaN	NaN	NaN	NaN	NaN	NaN	NaN	NaN	NaN	NaN	NaN	NaN	NaN	NaN	NaN	NaN	NaN	NaN	NaN	19.323	18.9468	18.7447	18.4516	18.2485	19.1788	19.2311	18.8631	18.6207	19.296	18.6568	NaN	NaN	NaN	NaN	NaN	NaN	NaN	NaN	NaN	NaN	NaN
NUMA1	Nuclear mitotic apparatus protein 1	2062	SMAFSILNTPKKLGNSLLRRGASKKALSKAS	KLGNS(1)LLR	1	17.0698	17.1943	16.7982	16.8174	16.8893	17.356	16.9038	16.5741	16.8665	16.9542	16.6608	NaN	NaN	NaN	NaN	NaN	NaN	NaN	NaN	NaN	NaN	NaN	NaN	NaN	NaN	NaN	NaN	NaN	NaN	NaN	NaN	NaN	NaN	17.3414	17.4107	17.2206	17.1924	16.8234	17.34	17.291	17.2451	17.0042	17.4466	16.8833
NUMA1	Nuclear mitotic apparatus protein 1	1225	KAQVARGRQEAERKNSLISSLEEEVSILNRQ	KNS(1)LISSLEEEVSILNR	1	17.2097	17.1788	17.318	17.5797	17.4772	17.8235	17.4723	17.5798	17.3274	17.4427	17.4997	19.6757	19.5399	19.7176	19.7474	19.7677	20.0624	19.8866	19.8092	19.7699	19.7502	19.8472	NaN	NaN	NaN	NaN	NaN	NaN	NaN	NaN	NaN	NaN	NaN	18.9941	18.5189	18.6763	18.9911	18.844	18.9425	19.2822	18.9321	18.4644	19.056	18.6805
NUMA1	Nuclear mitotic apparatus protein 1	1228	VARGRQEAERKNSLISSLEEEVSILNRQVLE	KNS(0.165)LIS(0.825)S(0.011)LEEEVSILNR	1	17.4473	17.1609	17.1947	17.381	17.2722	17.8117	17.4729	17.4573	17.6433	17.6241	17.3839	NaN	NaN	NaN	NaN	NaN	NaN	NaN	NaN	NaN	NaN	NaN	18.7007	18.1673	18.4944	18.3858	18.3954	18.7257	18.8121	18.7332	18.2268	18.684	18.2932	NaN	NaN	NaN	NaN	NaN	NaN	NaN	NaN	NaN	NaN	NaN
NUMA1	Nuclear mitotic apparatus protein 1	2026	PRPMTPRDRHEGRKQSTTEAQKKAAPASTKQ	KQS(0.988)T(0.011)T(0.001)EAQK	1	NaN	NaN	NaN	NaN	NaN	NaN	NaN	NaN	NaN	NaN	NaN	NaN	NaN	NaN	NaN	NaN	NaN	NaN	NaN	NaN	NaN	NaN	17.2642	17.2062	17.2471	17.192	17.0963	17.2392	17.1665	16.9852	16.9017	17.1668	16.6157	17.2337	17.3498	17.3113	17.1808	17.0015	17.5139	17.3009	16.8392	16.9089	17.0805	16.9215
NUMA1	Nuclear mitotic apparatus protein 1	1862	SLRATSSTQSLARLGSPDYGNSALLSLPGYR	LGS(1)PDYGNSALLSLPGYRPTTR	1	NaN	NaN	NaN	NaN	NaN	NaN	NaN	NaN	NaN	NaN	NaN	NaN	NaN	NaN	NaN	NaN	NaN	NaN	NaN	NaN	NaN	NaN	19.97	20.3931	19.3212	19.5153	18.9066	20.2016	19.8336	18.7318	19.0379	19.5835	18.6098	19.9694	20.4511	19.4398	19.7777	18.9064	20.3796	20.1071	19.0668	19.3264	19.3537	18.8374
NUMA1	Nuclear mitotic apparatus protein 1	1769	EPASPISQRLPPKVESLESLYFTPIPARSQA	VES(1)LESLYFTPIPAR	1	19.0418	19.0461	18.5338	18.926	18.6924	18.725	18.9798	18.6053	18.9797	18.9881	18.6419	17.0522	17.5257	16.8199	17.4606	16.3445	16.1114	17.027	16.7149	17.8062	16.9156	16.6591	17.8172	17.2091	16.7555	16.7728	16.7035	17.8753	17.1885	17.0042	16.9095	16.5394	16.837	17.1782	16.6038	16.4089	16.5282	16.1193	17.3352	16.4184	16.5304	16.7931	15.9937	16.0097
NUMA1	Nuclear mitotic apparatus protein 1	395	NEILQGKLSQLEEHLSQLQDNPPQEKGEVLG	LSQLEEHLS(1)QLQDNPPQEK	1	17.7762	17.9084	17.6996	17.7851	17.6671	17.7919	17.8523	17.6386	17.7845	17.9362	17.4349	18.8679	18.6181	18.3802	18.4327	18.714	18.4662	18.5041	18.4229	18.6673	18.6693	18.3093	18.8015	18.5046	18.5595	18.5211	18.4494	18.5236	18.568	18.4853	18.6027	18.7352	18.2797	18.8146	18.7897	18.6647	18.7022	18.8183	18.6376	18.3035	18.5252	18.6965	18.7477	18.3016
NUMA1	Nuclear mitotic apparatus protein 1	1728	QAKPQLDLSIDSLDLSCEEGTPLSITSKLPR	PQLDLSIDSLDLS(0.998)CEEGT(0.001)PLSITSK	1	NaN	NaN	NaN	NaN	NaN	NaN	NaN	NaN	NaN	NaN	NaN	NaN	NaN	NaN	NaN	NaN	NaN	NaN	NaN	NaN	NaN	NaN	15.605	16.2966	15.8736	15.8973	15.8667	16.0691	15.705	15.7058	15.5479	15.6492	15.4972	NaN	NaN	NaN	NaN	NaN	NaN	NaN	NaN	NaN	NaN	NaN
NUMA1	Nuclear mitotic apparatus protein 1	271	QRIDRLALLNEKQAASPLEPKELEELRDKNE	QAAS(1)PLEPK	1	20.1862	19.7083	19.7668	19.9827	20.1239	20.4531	20.1641	19.801	20.0942	20.0208	19.8334	21.1095	20.6127	20.8873	20.9406	20.9392	21.5584	21.1963	20.9612	21.3136	21.0346	20.816	19.3767	18.9495	19.0227	18.9074	19.0876	19.4563	19.3251	19.132	19.1147	19.3244	19.1859	20.4502	19.7214	19.9583	20.0288	20.0342	20.3077	20.3488	19.8583	19.9996	20.0539	19.7287
NUMA1	Nuclear mitotic apparatus protein 1	1145	SKLEQQCQKQQEQADSLERSLEAERASRAER	QQEQADS(1)LERSLEAER	1	NaN	NaN	NaN	NaN	NaN	NaN	NaN	NaN	NaN	NaN	NaN	18.4615	17.9528	18.2649	18.2087	18.1007	17.5381	17.9656	18.2144	18.2111	18.6277	17.9058	NaN	NaN	NaN	NaN	NaN	NaN	NaN	NaN	NaN	NaN	NaN	NaN	NaN	NaN	NaN	NaN	NaN	NaN	NaN	NaN	NaN	NaN
NUMA1	Nuclear mitotic apparatus protein 1	2051	PASTKQADRRQSMAFSILNTPKKLGNSLLRR	QS(0.003)MAFS(0.905)ILNT(0.092)PK	1	NaN	NaN	NaN	NaN	NaN	NaN	NaN	NaN	NaN	NaN	NaN	NaN	NaN	NaN	NaN	NaN	NaN	NaN	NaN	NaN	NaN	NaN	NaN	NaN	NaN	NaN	NaN	NaN	NaN	NaN	NaN	NaN	NaN	NaN	NaN	NaN	NaN	NaN	NaN	NaN	NaN	NaN	NaN	NaN
NUMA1	Nuclear mitotic apparatus protein 1	1969	EEMKTGDPQETLRRASMQPIQIAEGTGITTR	RAS(1)MQPIQIAEGTGITTR	1	15.7899	15.9737	15.9431	16.39	16.0313	16.3337	16.04	16.2192	16.6793	16.2917	15.8266	17.1506	17.4143	17.3344	17.3882	17.4993	16.9341	17.0459	17.1125	17.6791	17.1327	16.9999	17.2152	17.1577	17.261	16.8234	16.9415	16.9659	17.1926	17.0142	17.0478	17.1991	16.739	17.3724	17.1075	16.9557	16.5529	17.0747	17.6075	17.4498	17.057	16.539	17.2162	16.4846
NUMA1	Nuclear mitotic apparatus protein 1	1840	VEEPDSANSSFYSTRSAPASQASLRATSSTQ	S(1)APASQASLR	1	NaN	NaN	NaN	NaN	NaN	NaN	NaN	NaN	NaN	NaN	NaN	NaN	NaN	NaN	NaN	NaN	NaN	NaN	NaN	NaN	NaN	NaN	NaN	NaN	NaN	NaN	NaN	NaN	NaN	NaN	NaN	NaN	NaN	17.5519	17.9587	17.5038	17.6888	17.2285	17.8443	17.5929	17.7645	17.238	17.9299	17.3696
NUMA1	Nuclear mitotic apparatus protein 1	112	KMTMLLLYHSTMSSKSPRDWEQFEYKIQAEL	S(1)PRDWEQFEYK	1	NaN	NaN	NaN	NaN	NaN	NaN	NaN	NaN	NaN	NaN	NaN	18.01	17.9173	17.712	17.9858	17.7462	16.0044	18.021	17.7368	17.7006	17.7225	17.6997	19.4423	19.2967	19.1945	19.2525	19.108	19.5236	19.0443	19.198	18.9939	18.6535	19.0998	17.9263	17.7544	17.6584	17.6989	17.4372	18.0191	17.5117	17.4909	17.4203	16.5499	17.4425
NUMA1	Nuclear mitotic apparatus protein 1	1789	YFTPIPARSQAPLESSLDSLGDVFLDSGRKT	SQAPLES(0.999)S(1)LDS(1)LGDVFLDS(0.001)GRK	1;3	NaN	NaN	NaN	NaN	NaN	NaN	NaN	NaN	NaN	NaN	NaN	NaN	NaN	NaN	NaN	NaN	NaN	NaN	NaN	NaN	NaN	NaN	20.5269	18.8513	18.7764	18.5922	18.6568	20.927	20.548	19.6867	19.9991	20.4946	19.533	NaN	NaN	NaN	NaN	NaN	NaN	NaN	NaN	NaN	NaN	NaN
NUMA1	Nuclear mitotic apparatus protein 1	1792	PIPARSQAPLESSLDSLGDVFLDSGRKTRSA	SQAPLES(0.999)S(1)LDS(1)LGDVFLDS(0.001)GRK	1;3	NaN	NaN	NaN	NaN	NaN	NaN	NaN	NaN	NaN	NaN	NaN	NaN	NaN	NaN	NaN	NaN	NaN	NaN	NaN	NaN	NaN	NaN	17.4908	18.5957	18.0136	17.9419	17.5134	17.3747	17.2611	16.6748	17.0125	17.2989	16.7505	NaN	NaN	NaN	NaN	NaN	NaN	NaN	NaN	NaN	NaN	NaN
NUMA1	Nuclear mitotic apparatus protein 1	1800	PLESSLDSLGDVFLDSGRKTRSARRRTTQII	SQAPLESSLDSLGDVFLDS(1)GRK	1	19.5191	21.2462	20.3813	20.5588	20.0738	20.3111	19.8839	19.2127	19.8258	19.5896	19.2231	19.0857	21.1584	20.3349	20.4478	19.9999	20.0641	19.4292	18.9559	19.267	18.7616	18.2607	19.4418	20.7193	20.0491	19.8824	19.3171	19.0894	19.252	18.7465	18.8721	19.2166	18.7188	18.755	20.2147	19.5017	19.5209	18.9457	18.8216	18.703	17.8525	18.4609	18.3581	17.7043
NUMA1	Nuclear mitotic apparatus protein 1	1757	PRTQPDGTSVPGEPASPISQRLPPKVESLES	TQPDGTSVPGEPAS(1)PISQR	1	22.9278	23.136	23.1677	23.0625	23.113	22.191	22.9285	22.7584	23.0215	22.796	22.7829	23.444	23.6559	23.7175	23.6662	23.6428	22.842	23.548	23.4641	23.7215	23.4875	23.4004	23.0821	23.1971	23.2493	23.0334	22.9852	23.0465	22.7881	22.8315	22.7227	22.6082	22.8353	23.0407	23.0601	23.2225	23.0827	23.1475	23.1513	22.9159	22.9199	22.8331	22.7008	22.8508
CCDC174	Coiled-coil domain-containing protein 174	100	DLLEMDKNLQGRLFISPANEKTLLSEDMRKE	LFIS(1)PANEK	1	NaN	NaN	NaN	NaN	NaN	NaN	NaN	NaN	NaN	NaN	NaN	18.5901	19.5721	18.9259	19.0711	18.3721	19.0166	18.8461	17.8852	18.5822	18.4685	17.9837	15.8761	16.0634	15.7635	15.7388	15.1248	16.0188	15.916	15.3318	15.5365	16.1005	15.135	18.0772	18.5908	17.7526	17.8634	17.1827	18.2646	17.9948	17.1292	17.6038	17.8217	16.9599
PCDHGC3	Protocadherin gamma-C3	31	DSRRSDPLLKKPGAASPLASRQNTLRSCDPV	KPGAAS(1)PLASR	1	NaN	NaN	NaN	NaN	NaN	NaN	NaN	NaN	NaN	NaN	NaN	16.5475	16.8857	16.8079	16.8334	16.9633	17.1357	17.2254	17.2283	17.2493	17.3213	17.1969	16.1747	16.573	16.3352	16.3153	16.236	16.4773	16.2976	16.3994	16.2059	16.4448	16.3228	17.7398	17.9634	17.9889	17.9314	17.8592	18.0478	18.1127	18.0487	18.0188	18.1799	17.8269
ZNF302	Zinc finger protein 302	253	TFSHGSSLTRHQISHSGEKPYKCIECGKAFS	HQIS(0.001)HS(0.999)GEK	1	NaN	NaN	NaN	NaN	NaN	NaN	NaN	NaN	NaN	NaN	NaN	18.3862	19.142	18.6351	18.7229	18.7623	18.9455	19.2398	19.0829	19.2029	18.9652	19.0285	19.2402	18.8562	18.3749	18.7037	18.075	19.4258	19.2354	18.1221	18.7241	19.0454	18.1777	NaN	NaN	NaN	NaN	NaN	NaN	NaN	NaN	NaN	NaN	NaN
WNK3	Serine/threonine-protein kinase WNK3	1470	LLLKEREILTAGKQPSSDSEFSASLAGSGKS	QPS(0.631)S(0.361)DS(0.008)EFSASLAGSGK	1	NaN	NaN	NaN	NaN	NaN	NaN	NaN	NaN	NaN	NaN	NaN	17.9528	18.5869	18.6744	18.9351	18.4721	17.4381	18.7543	18.6818	18.9287	18.7088	18.5506	NaN	NaN	NaN	NaN	NaN	NaN	NaN	NaN	NaN	NaN	NaN	NaN	NaN	NaN	NaN	NaN	NaN	NaN	NaN	NaN	NaN	NaN
WNK3	Serine/threonine-protein kinase WNK3	1471	LLKEREILTAGKQPSSDSEFSASLAGSGKSV	QPS(0.002)S(0.979)DS(0.02)EFSASLAGSGK	1	NaN	NaN	NaN	NaN	NaN	NaN	NaN	NaN	NaN	NaN	NaN	NaN	NaN	NaN	NaN	NaN	NaN	NaN	NaN	NaN	NaN	NaN	16.7629	17.1509	16.9705	17.1423	17.139	16.7173	17.8495	17.2548	16.9185	18.6876	17.144	19.1064	18.8521	19.2145	19.1109	19.0831	19.0832	18.9204	19.1445	18.9818	18.5064	18.956
WNK3	Serine/threonine-protein kinase WNK3	304	SVKIGDLGLATLMRTSFAKSVIGTPEFMAPE	IGDLGLATLMRT(0.15)S(0.85)FAK	1	NaN	NaN	NaN	NaN	NaN	NaN	NaN	NaN	NaN	NaN	NaN	NaN	NaN	NaN	NaN	NaN	NaN	NaN	NaN	NaN	NaN	NaN	NaN	NaN	NaN	NaN	NaN	NaN	NaN	NaN	NaN	NaN	NaN	20.4384	20.1739	20.1824	20.078	20.1754	20.1149	19.9989	19.9423	20.244	20.1226	20.1827
KIAA0586	Protein TALPID3	586	RSTLKKGPYLRFNSPSPKSRPQRPKVIERVK	FNS(0.003)PS(0.997)PK	1	NaN	NaN	NaN	NaN	NaN	NaN	NaN	NaN	NaN	NaN	NaN	NaN	NaN	NaN	NaN	NaN	NaN	NaN	NaN	NaN	NaN	NaN	NaN	NaN	NaN	NaN	NaN	NaN	NaN	NaN	NaN	NaN	NaN	17.6641	17.8001	17.905	17.9417	17.6709	17.8149	17.8204	17.7771	17.6314	17.903	17.5919
KIAA0586	Protein TALPID3	1081	PWGDGDLPLEEENPNSPQEELHPRAIVMSVA	PWGDGDLPLEEENPNS(1)PQEELHPR	1;2	NaN	NaN	NaN	NaN	NaN	NaN	NaN	NaN	NaN	NaN	NaN	NaN	NaN	NaN	NaN	NaN	NaN	NaN	NaN	NaN	NaN	NaN	16.4106	16.4795	16.4388	16.3764	16.603	16.6833	16.2936	16.4097	16.0905	16.1692	16.5499	NaN	NaN	NaN	NaN	NaN	NaN	NaN	NaN	NaN	NaN	NaN
KIAA0586	Protein TALPID3	251	APLKEVEDTSFDKQKSPLETPAPRRFAPVPV	QKS(0.997)PLET(0.003)PAPR	1	NaN	NaN	NaN	NaN	NaN	NaN	NaN	NaN	NaN	NaN	NaN	18.6942	18.9846	18.6302	18.8733	18.8325	18.9697	18.9006	18.8349	18.9249	18.9211	18.7558	17.969	17.8676	17.9702	17.776	17.4771	17.9497	18.0935	17.7277	17.6943	18.2473	17.7564	18.1281	18.2668	17.9207	18.0717	17.8662	18.367	18.5139	18.0781	18.155	18.5294	18.0432
DHX29	ATP-dependent RNA helicase DHX29	200	KSRPKFQSPQIQATISPPLQPKTKTYEEDPK	FQSPQIQATIS(1)PPLQPK	1;2	20.5505	20.8551	20.7763	20.8077	20.7827	20.5925	20.8486	20.6613	20.9423	20.8617	20.9218	20.9091	21.2502	21.2805	21.2391	21.3171	21.193	21.2989	21.2461	21.366	21.0771	21.304	20.2475	20.3597	20.5334	20.3683	20.2651	20.3289	20.4238	20.3782	20.3193	20.4336	20.4771	20.8799	20.889	21.0847	21.0353	20.8872	20.9209	20.9981	21.0397	20.8676	20.9887	20.9052
SRP19	Signal recognition particle 19 kDa protein	8	________MACAAARSPADQDRFICIYPAYL	ACAAARS(1)PADQDRFICIYPAYLNNK	1	NaN	NaN	NaN	NaN	NaN	NaN	NaN	NaN	NaN	NaN	NaN	NaN	NaN	NaN	NaN	NaN	NaN	NaN	NaN	NaN	NaN	NaN	NaN	NaN	NaN	NaN	NaN	NaN	NaN	NaN	NaN	NaN	NaN	17.4857	17.3442	17.6481	17.4565	17.3488	17.4158	17.0799	17.3561	17.5456	17.378	17.3075
SRP19	Signal recognition particle 19 kDa protein	111	QKTGGADQSLQQGEGSKKGKGKKKK______	TGGADQSLQQGEGS(1)KK	1	16.8177	17.1887	17.1003	17.071	17.0604	16.6399	17.0914	17.1323	16.9945	16.9137	17.0186	NaN	NaN	NaN	NaN	NaN	NaN	NaN	NaN	NaN	NaN	NaN	NaN	NaN	NaN	NaN	NaN	NaN	NaN	NaN	NaN	NaN	NaN	18.4638	19.0115	19.1084	18.9081	18.7253	18.5932	18.5791	18.6709	18.5506	18.8182	18.6437
SAMD11	Sterile alpha motif domain-containing protein 11	95	RISSDCFSEKRARSESPQEALLLPRELGPSM	SES(1)PQEALLLPR	1	NaN	NaN	NaN	NaN	NaN	NaN	NaN	NaN	NaN	NaN	NaN	18.1833	17.7779	17.78	17.714	17.9144	17.9604	18.412	17.9579	18.1227	18.2046	18.0542	NaN	NaN	NaN	NaN	NaN	NaN	NaN	NaN	NaN	NaN	NaN	18.1967	18.1162	17.5454	17.7155	18.0737	18.4397	18.0276	17.7416	17.7239	17.9992	17.82
DISC1	Disrupted in schizophrenia 1 protein	97	RARQCGLDSRGLLVRSPVSKSAAAPTVTSVR	GLLVRS(0.997)PVS(0.003)K	1	NaN	NaN	NaN	NaN	NaN	NaN	NaN	NaN	NaN	NaN	NaN	NaN	NaN	NaN	NaN	NaN	NaN	NaN	NaN	NaN	NaN	NaN	NaN	NaN	NaN	NaN	NaN	NaN	NaN	NaN	NaN	NaN	NaN	17.9591	18.1444	18.3097	18.2379	17.7946	18.2144	18.2577	17.7782	18.1214	18.4205	17.8
FRMPD4	FERM and PDZ domain-containing protein 4	605	LLTLSGPETLKKAQESPRGAKVSFIFGDFAL	AQES(1)PRGAK	1	NaN	NaN	NaN	NaN	NaN	NaN	NaN	NaN	NaN	NaN	NaN	18.2227	18.2517	18.3194	18.3074	18.1894	17.7753	18.0381	17.7392	18.3149	18.0708	18.0311	18.9645	18.9195	18.6874	18.7165	18.42	18.9461	18.8478	18.7501	18.842	18.7439	18.8773	NaN	NaN	NaN	NaN	NaN	NaN	NaN	NaN	NaN	NaN	NaN
FRMPD4	FERM and PDZ domain-containing protein 4	117	SCKESILLTVIQPYPSPKSAFISAAKKARLK	ESILLTVIQPYPS(1)PK	1	NaN	NaN	NaN	NaN	NaN	NaN	NaN	NaN	NaN	NaN	NaN	16.5659	16.6392	16.7006	16.8528	16.7758	16.6035	17.0797	16.8451	16.9839	16.7541	16.9237	NaN	NaN	NaN	NaN	NaN	NaN	NaN	NaN	NaN	NaN	NaN	15.3892	15.3475	15.2417	14.8424	14.9439	15.1801	15.8636	15.254	14.8695	15.7912	15.3849
STK3	Serine/threonine-protein kinase 3;Serine/threonine-protein kinase 3 36kDa subunit;Serine/threonine-protein kinase 3 20kDa subunit	205	RHEEQQRELEEEEENSDEDELDSHTMVKTSV	RHEEQQRELEEEEENS(1)DEDELDSHTMVK	1	21.2354	21.6843	21.5963	21.4584	21.6219	21.5965	21.5228	21.5339	21.6776	21.4623	21.6062	22.3431	22.5017	22.5269	22.5027	22.5648	22.2799	22.6129	22.524	22.671	22.4469	22.6508	21.0097	21.2687	21.3026	21.1911	21.2326	21.3376	21.1494	21.2391	21.0129	21.2092	21.2014	22.2406	22.4014	22.5178	22.4401	22.4078	22.4031	22.4282	22.6093	22.3484	22.4198	22.3805
STK3	Serine/threonine-protein kinase 3;Serine/threonine-protein kinase 3 36kDa subunit;Serine/threonine-protein kinase 3 20kDa subunit	274	EDEEEEDGTMKRNATSPQVQRPSFMDYFDKQ	RNAT(0.199)S(0.799)PQVQRPS(0.002)FMDYFDK	1	17.3921	17.7182	17.7648	17.6065	17.5254	16.876	17.3024	17.3759	17.484	17.3202	17.4651	19.2097	19.8734	19.5151	19.5865	19.5302	18.3587	19.4044	19.0598	19.2991	19.2018	19.3323	18.6458	18.7559	18.7162	18.6061	18.5731	18.6851	18.5921	18.4057	18.538	18.3831	18.3974	18.8398	19.3752	19.1176	19.0744	18.9222	19.0811	18.8175	18.81	18.6636	18.5707	18.8784
GATA4	Transcription factor GATA-4	405	GHGPSIHPVLSALKLSPQGYASPVSQSPQTS	LS(1)PQGYASPVSQSPQTSSK	1	NaN	NaN	NaN	NaN	NaN	NaN	NaN	NaN	NaN	NaN	NaN	17.1558	17.3925	17.5091	17.3661	17.3179	15.3112	17.1731	17.0326	17.5074	17.1869	17.4015	15.8181	15.8123	15.7847	15.9387	15.7435	15.8682	15.4036	15.9581	15.5096	14.1797	15.6328	17.4742	17.3982	17.5729	17.5564	17.3757	17.7016	17.0592	17.6121	17.2461	16.3119	17.4576
GATA4	Transcription factor GATA-4	411	HPVLSALKLSPQGYASPVSQSPQTSSKQDSW	LS(0.009)PQGY(0.001)AS(0.986)PVS(0.003)QSPQTSSK	1	17.4177	17.8882	17.8827	18.0631	17.7161	16.0928	17.8569	17.789	17.8375	17.6837	17.891	NaN	NaN	NaN	NaN	NaN	NaN	NaN	NaN	NaN	NaN	NaN	NaN	NaN	NaN	NaN	NaN	NaN	NaN	NaN	NaN	NaN	NaN	15.755	16.0449	16.0031	15.4035	15.9503	16.3896	16.1366	15.8513	15.8677	16.1153	16.1177
GATA4	Transcription factor GATA-4	414	LSALKLSPQGYASPVSQSPQTSSKQDSWNSL	LSPQGYAS(0.001)PVS(0.859)QS(0.1)PQT(0.033)S(0.007)S(0.001)K	1	NaN	NaN	NaN	NaN	NaN	NaN	NaN	NaN	NaN	NaN	NaN	NaN	NaN	NaN	NaN	NaN	NaN	NaN	NaN	NaN	NaN	NaN	16.2692	16.2543	16.2664	16.2628	16.0289	16.413	16.9042	16.1848	16.0837	16.3033	16.2578	NaN	NaN	NaN	NaN	NaN	NaN	NaN	NaN	NaN	NaN	NaN
GATA4	Transcription factor GATA-4	416	ALKLSPQGYASPVSQSPQTSSKQDSWNSLVL	LSPQGYASPVS(0.07)QS(0.929)PQTSSK	1	NaN	NaN	NaN	NaN	NaN	NaN	NaN	NaN	NaN	NaN	NaN	NaN	NaN	NaN	NaN	NaN	NaN	NaN	NaN	NaN	NaN	NaN	15.5714	15.7582	15.8581	15.7284	15.9822	15.896	16.202	16.0528	15.6416	15.9432	16.1784	16.4438	16.752	16.7728	16.5889	16.6227	16.7902	16.8644	16.6443	16.0939	16.3877	16.5603
GATA4;R3HDM4	Transcription factor GATA-4;R3H domain-containing protein 4	261	MNGINRPLIKPQRRLSASRRVGLSCANCQTT	RLS(0.5)AS(0.5)RR	1	18.7355	18.8956	18.8592	18.7465	18.7303	18.3599	18.684	18.6577	18.7197	18.5685	18.5815	NaN	NaN	NaN	NaN	NaN	NaN	NaN	NaN	NaN	NaN	NaN	NaN	NaN	NaN	NaN	NaN	NaN	NaN	NaN	NaN	NaN	NaN	NaN	NaN	NaN	NaN	NaN	NaN	NaN	NaN	NaN	NaN	NaN
GATA4;R3HDM4	Transcription factor GATA-4;R3H domain-containing protein 4	263	GINRPLIKPQRRLSASRRVGLSCANCQTTTT	RLS(0.153)AS(0.847)RR	1	18.7355	18.8956	18.8592	18.7465	18.7303	18.3599	18.684	18.6577	18.7197	18.5685	18.5815	NaN	NaN	NaN	NaN	NaN	NaN	NaN	NaN	NaN	NaN	NaN	NaN	NaN	NaN	NaN	NaN	NaN	NaN	NaN	NaN	NaN	NaN	NaN	NaN	NaN	NaN	NaN	NaN	NaN	NaN	NaN	NaN	NaN
RAVER1	Ribonucleoprotein PTB-binding 1	6	__________MAADVSVTHRPPLSPKSGAEV	AADVS(0.991)VT(0.009)HRPPLSPK	1;2	23.1801	23.6156	23.5834	23.1204	23.348	23.275	22.7734	22.8756	23.2211	22.8015	22.7396	NaN	NaN	NaN	NaN	NaN	NaN	NaN	NaN	NaN	NaN	NaN	21.5864	21.6464	21.2434	21.5025	21.4161	21.8984	21.6289	21.6721	21.2322	21.7291	21.4969	NaN	NaN	NaN	NaN	NaN	NaN	NaN	NaN	NaN	NaN	NaN
RAVER1	Ribonucleoprotein PTB-binding 1	14	__MAADVSVTHRPPLSPKSGAEVEAGDAAER	AADVSVTHRPPLS(1)PK	1	20.5091	19.8513	19.8797	20.1322	20.1351	20.5221	20.7876	20.6744	20.7629	20.7129	20.5998	25.0095	25.3124	25.397	24.9814	25.3338	25.227	24.8697	24.9261	25.0004	24.7692	25.0017	23.0453	23.5758	23.2172	23.3294	23.3684	23.3683	22.8911	23.391	22.5943	22.9889	22.8508	24.6182	24.7956	24.2979	24.527	24.5922	24.746	24.1591	24.7206	24.2154	24.2943	24.3884
RAVER1	Ribonucleoprotein PTB-binding 1	680	IGSSPLGSGEGLLGLSPGPNGHSHLLKTPLG	AIGS(0.104)S(0.896)PLGSGEGLLGLS(1)PGPNGHSHLLK	1;2	NaN	NaN	NaN	NaN	NaN	NaN	NaN	NaN	NaN	NaN	NaN	17.4503	18.2388	17.891	17.8795	17.7069	17.9652	17.926	17.4921	17.691	17.698	17.6723	NaN	NaN	NaN	NaN	NaN	NaN	NaN	NaN	NaN	NaN	NaN	NaN	NaN	NaN	NaN	NaN	NaN	NaN	NaN	NaN	NaN	NaN
RAVER1	Ribonucleoprotein PTB-binding 1	617	REPALGPHGPSRHKMSPPPSGFGERSSGGSG	HKMS(1)PPPSGFGER	1	22.9543	23.3873	23.4543	23.3705	23.377	23.4527	23.2867	23.2497	23.469	23.3206	23.4353	23.1187	23.4319	23.5621	23.4509	23.503	23.5059	23.4478	23.3369	23.5485	23.3514	23.4506	22.7689	22.8494	22.8618	22.8538	22.7565	22.8271	22.8162	22.9095	22.7108	22.7537	22.938	23.4299	23.334	23.6064	23.4839	23.4328	23.4372	23.4133	23.4997	23.2567	23.3416	23.4201
RAVER1	Ribonucleoprotein PTB-binding 1	621	LGPHGPSRHKMSPPPSGFGERSSGGSGGGPL	HKMS(0.461)PPPS(0.539)GFGER	1	NaN	NaN	NaN	NaN	NaN	NaN	NaN	NaN	NaN	NaN	NaN	NaN	NaN	NaN	NaN	NaN	NaN	NaN	NaN	NaN	NaN	NaN	18.6116	18.3606	18.6268	18.5116	18.577	18.4264	18.785	18.738	18.2264	19.0228	18.5653	NaN	NaN	NaN	NaN	NaN	NaN	NaN	NaN	NaN	NaN	NaN
RAVER1	Ribonucleoprotein PTB-binding 1	399	ALQTQGQKKPGILGDSPLGALQPGAQPANPL	KPGILGDS(1)PLGALQPGAQPANPLLGELPAGGGLPPELPPRR	1	NaN	NaN	NaN	NaN	NaN	NaN	NaN	NaN	NaN	NaN	NaN	NaN	NaN	NaN	NaN	NaN	NaN	NaN	NaN	NaN	NaN	NaN	16.3539	16.301	16.0045	16.2722	15.9687	16.3086	16.264	15.5942	16.351	16.3536	16.1146	NaN	NaN	NaN	NaN	NaN	NaN	NaN	NaN	NaN	NaN	NaN
RAVER1	Ribonucleoprotein PTB-binding 1	567	GSSSSKAFQLKSRLLSPLSSARLPPEPGLSD	LLS(0.998)PLS(0.002)SAR	1	18.6089	19.0377	18.8871	18.7565	18.5651	20.8954	18.7662	17.8175	18.8373	18.5288	18.5416	17.9671	18.2145	18.2503	18.0884	18.0235	20.0351	18.3326	17.6524	18.423	17.9306	18.0745	NaN	NaN	NaN	NaN	NaN	NaN	NaN	NaN	NaN	NaN	NaN	19.053	19.018	19.0273	18.9184	18.7189	19.1595	19.2684	18.9696	18.7092	19.1745	18.8767
RAVER1	Ribonucleoprotein PTB-binding 1	643	SGGSGGGPLSHFYSGSPTSYFTSGLQAGLKQ	SSGGSGGGPLSHFYS(0.001)GS(0.994)PT(0.005)SYFTSGLQAGLK	1	NaN	NaN	NaN	NaN	NaN	NaN	NaN	NaN	NaN	NaN	NaN	19.5223	20.7458	20.1252	19.5504	19.4712	19.9797	18.8594	18.3455	18.9998	18.5163	18.2389	NaN	NaN	NaN	NaN	NaN	NaN	NaN	NaN	NaN	NaN	NaN	19.627	20.7359	18.7551	19.6192	19.3156	20.1737	19.05	18.9773	18.2755	18.6281	17.6444
CAP2	Adenylyl cyclase-associated protein;Adenylyl cyclase-associated protein 2	189	TYKNPSLRAQGGQTQSPTKSHTPSPTSPKSY	AQGGQTQS(1)PTK	1	20.3453	20.7146	20.6517	20.479	20.3165	20.2575	20.4965	20.2886	20.4727	20.2041	20.2488	22.2258	22.5486	22.5296	22.4132	22.3258	22.0771	22.3972	22.0953	22.3276	22.063	22.0682	20.4782	20.7311	20.6948	20.5704	20.4127	20.5125	20.4938	20.4389	20.2842	20.4033	20.3673	23.9268	24.297	24.211	24.1387	23.8027	23.9414	23.9872	23.7942	23.7819	23.8366	23.6223
CAP2	Adenylyl cyclase-associated protein;Adenylyl cyclase-associated protein 2	197	AQGGQTQSPTKSHTPSPTSPKSYPSQKHAPV	SHTPS(1)PTSPK	1;2;3;4;5	19.3128	19.4446	19.5245	19.4681	19.7155	19.2135	19.3084	19.3603	19.3211	19.5957	19.2633	21.1705	21.3714	21.554	21.4841	21.4819	21.4986	21.307	21.1529	21.2904	21.1935	21.1267	18.214	18.3483	18.2058	18.0693	18.1061	18.149	18.2324	18.1334	17.9684	18.0638	18.1501	21.0284	21.2136	21.1317	21.182	21.0771	21.048	20.9716	21.1138	20.9087	20.9843	21.0541
CAP2	Adenylyl cyclase-associated protein;Adenylyl cyclase-associated protein 2	200	GQTQSPTKSHTPSPTSPKSYPSQKHAPVLEL	SHTPSPT(0.001)S(0.999)PK	1;2;3;5	NaN	NaN	NaN	NaN	NaN	NaN	NaN	NaN	NaN	NaN	NaN	23.5906	23.8182	23.8683	23.883	23.8244	23.5512	23.836	23.8387	23.9021	23.7151	23.8035	21.8906	22.0577	21.8546	21.8256	21.8047	22.0017	21.9044	21.8134	21.7754	21.6788	21.8886	23.6232	23.8613	23.9107	23.8299	23.6459	23.8122	23.7328	23.8741	23.6049	23.64	23.6829
CAP2	Adenylyl cyclase-associated protein;Adenylyl cyclase-associated protein 2	144	PGPPPLFENEGKKEESSPSRSALFAQLNQGE	KEES(0.647)S(0.351)PS(0.001)RSALFAQLNQGEAITK	1	NaN	NaN	NaN	NaN	NaN	NaN	NaN	NaN	NaN	NaN	NaN	19.3874	19.6411	19.4639	19.6023	19.4807	18.7964	19.9265	19.5709	19.746	19.415	19.5565	16.9211	17.111	17.079	17.1347	16.7464	17.4226	16.9981	16.8896	16.9921	16.8157	16.8679	19.2191	19.5066	19.2435	19.0867	19.0225	19.5123	19.149	19.3244	19.3188	18.759	19.0613
CAP2	Adenylyl cyclase-associated protein;Adenylyl cyclase-associated protein 2	145	GPPPLFENEGKKEESSPSRSALFAQLNQGEA	KEES(0.024)S(0.966)PS(0.01)R	1	20.5739	21.0207	20.8708	20.9206	20.6441	19.9032	21.1632	20.7929	21.0092	20.866	20.8235	19.396	20.0706	19.9406	19.5874	19.6684	18.5261	20.0816	19.7528	20.079	19.5423	19.7485	21.4258	21.4349	21.2332	21.237	21.0635	21.7046	21.2786	21.2432	21.2299	20.8117	21.2742	18.5698	18.7426	18.6039	18.4749	18.2291	18.7188	18.3503	18.5223	18.428	18.0341	18.1506
IFFO1	Intermediate filament family orphan 1	560	VPLSDPPPPPSEAEDSDRDVSSDSSMR____	SPAFTAVPLSDPPPPPS(0.006)EAEDS(0.974)DRDVS(0.007)S(0.009)DS(0.002)S(0.002)MR	1	NaN	NaN	NaN	NaN	NaN	NaN	NaN	NaN	NaN	NaN	NaN	NaN	NaN	NaN	NaN	NaN	NaN	NaN	NaN	NaN	NaN	NaN	16.8608	17.2991	17.1901	17.123	17.0727	16.9576	16.9998	16.982	16.9096	17.3474	16.9698	15.9012	16.4601	16.5363	16.2336	16.3572	15.8845	15.6217	16.0042	15.4785	16.1703	15.6718
ANK3	Ankyrin-3	890	DKYLGPQDLKELGDDSLPAEGYMGFSLGARS	ELGDDS(1)LPAEGYMGFSLGAR	1	NaN	NaN	NaN	NaN	NaN	NaN	NaN	NaN	NaN	NaN	NaN	16.9341	17.0861	17.4882	17.5831	17.6118	17.2153	16.5657	17.0283	17.5003	17.3781	17.1653	NaN	NaN	NaN	NaN	NaN	NaN	NaN	NaN	NaN	NaN	NaN	NaN	NaN	NaN	NaN	NaN	NaN	NaN	NaN	NaN	NaN	NaN
PLEKHA2	Pleckstrin homology domain-containing family A member 2	351	GSAPGVLPSSRIRHRSEPQHPKEKPFMFNLD	HRS(1)EPQHPK	1	18.4078	18.8031	18.7789	18.7571	18.5836	18.3453	18.5113	18.6205	18.7213	18.6382	18.6769	18.566	18.7187	18.9765	19.0266	18.9797	18.172	18.3412	18.5847	18.6077	18.4973	18.7995	NaN	NaN	NaN	NaN	NaN	NaN	NaN	NaN	NaN	NaN	NaN	18.8584	18.9089	19.3644	19.0871	18.9077	18.4813	19.0998	19.2115	18.8426	19.1769	19.0546
PLEKHA2	Pleckstrin homology domain-containing family A member 2	132	GQEGSEPGSHTILRRSQSYIPTSGCRASTGP	S(0.701)QS(0.074)Y(0.021)IPT(0.194)S(0.009)GCR	1	18.2564	18.3866	18.3915	18.185	18.3389	18.0809	18.2404	18.3276	18.286	18.4848	18.0396	NaN	NaN	NaN	NaN	NaN	NaN	NaN	NaN	NaN	NaN	NaN	16.0667	15.9022	16.0632	15.9907	15.7639	16.3262	15.8928	16.1904	15.6253	15.5468	16.0327	NaN	NaN	NaN	NaN	NaN	NaN	NaN	NaN	NaN	NaN	NaN
PLEKHA2	Pleckstrin homology domain-containing family A member 2	134	EGSEPGSHTILRRSQSYIPTSGCRASTGPPL	SQS(0.999)YIPT(0.001)SGCR	1	NaN	NaN	NaN	NaN	NaN	NaN	NaN	NaN	NaN	NaN	NaN	18.4433	18.2887	18.3329	18.0769	18.2336	18.6011	18.32	18.3912	18.544	18.53	18.3575	NaN	NaN	NaN	NaN	NaN	NaN	NaN	NaN	NaN	NaN	NaN	18.3435	18.328	18.3674	18.184	18.1037	18.3703	18.5257	18.3222	18.07	18.5488	18.2802
ANK3	Ankyrin-3	1782	LKPKIHGSGHVEEPASPLAAYQKSLEETSKL	IHGSGHVEEPAS(1)PLAAYQK	1	NaN	NaN	NaN	NaN	NaN	NaN	NaN	NaN	NaN	NaN	NaN	NaN	NaN	NaN	NaN	NaN	NaN	NaN	NaN	NaN	NaN	NaN	NaN	NaN	NaN	NaN	NaN	NaN	NaN	NaN	NaN	NaN	NaN	NaN	NaN	NaN	NaN	NaN	NaN	NaN	NaN	NaN	NaN	NaN
ANK3	Ankyrin-3	1399	FKENRLPFSIKIRDTSQEPCGRLSFLKEPKT	IRDT(0.008)S(0.992)QEPCGR	1	16.8658	16.7255	17.0693	17.0291	17.1324	16.9251	17.1542	17.0395	17.2385	17.3042	17.21	NaN	NaN	NaN	NaN	NaN	NaN	NaN	NaN	NaN	NaN	NaN	19.4371	19.329	19.274	19.3001	19.0414	19.2139	19.3741	19.5842	19.5485	19.2652	19.366	20.6595	20.8687	20.7073	20.8615	20.631	20.6168	20.8916	21.1424	20.7156	20.8615	20.8296
ANK3	Ankyrin-3	1817	TKPCVPVSMKKMSRTSPADGKPRLSLHEEEG	MSRT(0.033)S(0.967)PADGKPR	1	18.8625	19.2144	18.8808	19.0212	18.7626	19.4918	19.1127	19.1048	19.3282	19.1892	19.1425	20.8152	21.0891	20.7329	20.9751	20.8902	21.1859	21.2693	21.024	21.1636	21.1505	21.1091	19.9539	19.9963	19.6797	19.8749	19.558	20.1664	20.0756	19.9926	19.8039	20.061	19.9908	NaN	NaN	NaN	NaN	NaN	NaN	NaN	NaN	NaN	NaN	NaN
ANK3		412	TDRRQSFASLALRPQSPCERTDIRMAIVADH	QSFAS(0.002)LALRPQS(0.998)PCER	1	16.615	16.5862	16.5292	16.8978	16.912	16.4403	16.8238	16.8697	16.9758	16.818	16.9439	NaN	NaN	NaN	NaN	NaN	NaN	NaN	NaN	NaN	NaN	NaN	NaN	NaN	NaN	NaN	NaN	NaN	NaN	NaN	NaN	NaN	NaN	NaN	NaN	NaN	NaN	NaN	NaN	NaN	NaN	NaN	NaN	NaN
ZNF568	Zinc finger protein 568	35	HMMERKAWCSQESALSEEEEDTTRPLETVTF	AWCSQESALS(1)EEEEDTTRPLETVTFK	1	NaN	NaN	NaN	NaN	NaN	NaN	NaN	NaN	NaN	NaN	NaN	NaN	NaN	NaN	NaN	NaN	NaN	NaN	NaN	NaN	NaN	NaN	NaN	NaN	NaN	NaN	NaN	NaN	NaN	NaN	NaN	NaN	NaN	NaN	NaN	NaN	NaN	NaN	NaN	NaN	NaN	NaN	NaN	NaN
C18orf8	Uncharacterized protein C18orf8	281	PYQIPITGPAAVTSQSPVPCKLYSSSWIVFQ	SIQPYQIPITGPAAVT(0.008)S(0.209)QS(0.783)PVPCK	1	16.9468	16.6967	16.6365	16.5534	16.479	17.5973	17.7608	17.9036	17.722	17.786	17.9957	NaN	NaN	NaN	NaN	NaN	NaN	NaN	NaN	NaN	NaN	NaN	16.7189	16.9633	16.6206	17.0647	16.7473	17.2583	17.2764	17.3631	17.0763	17.4143	17.3524	NaN	NaN	NaN	NaN	NaN	NaN	NaN	NaN	NaN	NaN	NaN
HMGN3		78	KKEEKQEAGKEGTAPSENGETKAEEIHISRS	EGTAPS(1)ENGETK	1	21.5243	21.8933	22.1373	22.1033	22.2471	20.4861	21.805	21.8746	21.9664	21.8824	21.621	20.6605	21.1272	21.383	21.2713	21.3449	19.9101	21.0276	21.1365	21.1956	21.1145	20.7282	21.1546	21.6653	21.9634	21.7389	21.7775	21.4866	21.2544	21.5062	21.4096	21.0781	21.1934	20.3289	20.7348	20.8843	20.7686	20.9343	20.4921	20.3938	20.6704	20.2875	20.3053	20.3738
HMGN3;HMGN2	High mobility group nucleosome-binding domain-containing protein 3;Non-histone chromosomal protein HMG-17	29	KAKVKDEPQRRSARLSAKPAPPKPEPKPKKA;SKVTKQEPTRRSARLSAKPAPPKPEPKPRKT	S(1)ARLS(1)AK	1;2	23.3081	24.7086	23.9088	24.1615	23.5574	22.2119	23.8608	23.1531	23.7182	23.6698	23.4264	22.6366	24.1441	23.2918	23.5635	22.9149	21.6271	23.3095	22.4775	23.0999	23.0743	22.8095	18.4613	18.983	18.4136	18.5582	18.1513	18.6172	18.1014	18.1701	18.1601	17.6822	17.9923	22.1242	22.7145	22.1329	22.2959	21.7533	22.3028	22.0149	21.8534	22.024	21.6266	21.6947
HMGN3	High mobility group nucleosome-binding domain-containing protein 3	27	GKDGSKVTKQEPTRRSARLSAKPAPPKPEPK	S(1)ARLS(1)AK	1;2	NaN	NaN	NaN	NaN	NaN	NaN	NaN	NaN	NaN	NaN	NaN	NaN	NaN	NaN	NaN	NaN	NaN	NaN	NaN	NaN	NaN	NaN	17.6687	18.4317	17.6953	17.954	17.4794	18.1843	17.7538	17.8157	17.8584	18.1218	17.8923	NaN	NaN	NaN	NaN	NaN	NaN	NaN	NaN	NaN	NaN	NaN
HMGN3	High mobility group nucleosome-binding domain-containing protein 3	6	__________MPKRKSPENTEGKDGSKVTKQ	RKS(1)PENTEGK	1	25.8345	25.7396	25.5976	25.7461	25.6515	25.9931	26.2603	25.9237	26.0989	26.0978	26.1006	25.2875	25.2382	25.3153	25.3628	25.3056	25.7228	25.7764	25.5151	25.6139	25.6804	25.6693	25.2718	25.0929	25.0561	25.1206	25.0348	25.4602	25.4682	25.4266	25.353	25.3956	25.4265	26.4124	26.2149	26.1413	26.2122	26.1195	26.6192	26.6424	26.5019	26.3824	26.658	26.5618
EIF3H	Eukaryotic translation initiation factor 3 subunit H	180	RLTPKLMEVCKEKDFSPEALKKANITFEYMF	EKDFS(1)PEALKK	1	21.4781	21.5989	21.3876	21.5396	21.316	22.0436	21.7021	20.8629	21.3168	21.4964	21.0027	21.6611	21.7508	21.4203	21.5586	21.3392	21.4345	22.0179	21.1519	21.3786	21.6444	21.1966	20.6274	20.5462	20.4396	20.4814	20.216	20.7407	20.6129	20.3506	20.1706	20.6679	20.1964	22.1574	22.1725	21.9977	22.0772	21.8063	22.3719	22.2399	21.8325	21.6596	21.8634	21.6513
EIF3H	Eukaryotic translation initiation factor 3 subunit H	14	__MASRKEGTGSTATSSSSTAGAAGKGKGKG	EGTGSTAT(0.046)S(0.82)S(0.089)S(0.012)S(0.017)T(0.017)AGAAGK	1	NaN	NaN	NaN	NaN	NaN	NaN	NaN	NaN	NaN	NaN	NaN	NaN	NaN	NaN	NaN	NaN	NaN	NaN	NaN	NaN	NaN	NaN	NaN	NaN	NaN	NaN	NaN	NaN	NaN	NaN	NaN	NaN	NaN	NaN	NaN	NaN	NaN	NaN	NaN	NaN	NaN	NaN	NaN	NaN
EIF3H	Eukaryotic translation initiation factor 3 subunit H	16	MASRKEGTGSTATSSSSTAGAAGKGKGKGGS	EGTGSTATS(0.001)SS(0.759)S(0.238)T(0.003)AGAAGK	1	NaN	NaN	NaN	NaN	NaN	NaN	NaN	NaN	NaN	NaN	NaN	NaN	NaN	NaN	NaN	NaN	NaN	NaN	NaN	NaN	NaN	NaN	NaN	NaN	NaN	NaN	NaN	NaN	NaN	NaN	NaN	NaN	NaN	16.9677	17.6908	17.3878	16.9739	16.9057	16.9227	16.8876	16.4606	16.4621	16.7502	16.5391
EIF3H	Eukaryotic translation initiation factor 3 subunit H	17	ASRKEGTGSTATSSSSTAGAAGKGKGKGGSG	EGTGSTATSS(0.001)S(0.078)S(0.897)T(0.024)AGAAGK	1	16.3082	16.8795	16.3556	16.4509	16.5837	16.1656	16.1995	16.338	16.7817	16.5536	16.2549	NaN	NaN	NaN	NaN	NaN	NaN	NaN	NaN	NaN	NaN	NaN	16.3625	16.8992	16.7788	16.444	16.1665	15.9902	16.3154	16.0881	16.0273	16.0829	15.9886	NaN	NaN	NaN	NaN	NaN	NaN	NaN	NaN	NaN	NaN	NaN
MSANTD4	Myb/SANT-like DNA-binding domain-containing protein 4	40	SLTEVKVEEEERDPQSPEFEIEEEEEMLSSV	VEEEERDPQS(0.997)PEFEIEEEEEMLS(0.002)S(0.001)VIPDSR	1	16.5469	16.2391	16.3798	16.2968	16.5075	15.4127	16.7443	16.9327	16.802	16.8403	17.0057	16.509	15.9792	15.2356	16.1171	15.6281	14.7961	16.2675	16.5492	16.384	16.3081	16.186	NaN	NaN	NaN	NaN	NaN	NaN	NaN	NaN	NaN	NaN	NaN	16.4289	15.5793	15.2361	16.0465	15.8915	16.622	16.5685	17.0184	15.6105	16.0162	16.2169
BRCC3	Lys-63-specific deubiquitinase BRCC36	291	QELQQEKEELMQELSSLE_____________	EELMQELS(0.1)S(0.9)LE	1	NaN	NaN	NaN	NaN	NaN	NaN	NaN	NaN	NaN	NaN	NaN	NaN	NaN	NaN	NaN	NaN	NaN	NaN	NaN	NaN	NaN	NaN	14.2258	14.701	14.5738	14.0677	14.0508	14.47	14.0903	14.1419	14.1772	14.3648	14.5608	NaN	NaN	NaN	NaN	NaN	NaN	NaN	NaN	NaN	NaN	NaN
PPIP5K2	Inositol hexakisphosphate and diphosphoinositol-pentakisphosphate kinase 2	38	HFFHHADEDDEEEDDSPPERQIVVGICSMAK	HFFHHADEDDEEEDDS(1)PPER	1	19.9127	20.2603	20.1495	20.4326	20.2016	20.4455	20.2548	20.0486	20.613	20.2687	20.0695	20.8912	21.6597	21.3081	21.6389	21.3553	20.9715	21.2632	21.0333	21.6769	21.2138	21.0421	19.2365	19.1396	19.5255	19.4985	19.157	19.1291	19.6321	19.5159	19.2732	19.6041	19.1266	20.408	19.9739	20.8019	20.7755	20.2931	20.4063	20.7483	20.883	20.7579	20.9829	20.5319
PPIP5K2	Inositol hexakisphosphate and diphosphoinositol-pentakisphosphate kinase 2	1123	GCIDDATRGSAVKRFSISFARHPTNEHLHLY	RFS(1)ISFAR	1	NaN	NaN	NaN	NaN	NaN	NaN	NaN	NaN	NaN	NaN	NaN	NaN	NaN	NaN	NaN	NaN	NaN	NaN	NaN	NaN	NaN	NaN	NaN	NaN	NaN	NaN	NaN	NaN	NaN	NaN	NaN	NaN	NaN	16.7783	16.7783	16.6582	16.3779	16.5396	16.6918	17.4161	16.6975	16.6032	17.4871	16.4302
PPIP5K2	Inositol hexakisphosphate and diphosphoinositol-pentakisphosphate kinase 2	1021	LHYTSGVGTGRRRRRSGEQITSSPVSPKSLA	S(1)GEQITSSPVSPK	1;2	18.1259	18.0318	17.9865	18.1328	18.1621	18.4704	18.2717	18.407	18.3886	18.4658	18.2958	16.5899	16.6744	16.843	16.7559	16.6355	17.0484	16.9327	16.8885	17.0877	17.02	16.9188	17.5276	17.3803	17.3934	17.5095	17.4965	17.6261	17.7572	17.8084	17.6214	17.9845	17.6639	17.4359	17.5607	17.5631	17.3883	17.2718	17.6016	17.4163	17.5881	17.3422	17.6317	17.5477
PPIP5K2	Inositol hexakisphosphate and diphosphoinositol-pentakisphosphate kinase 2	1206	DVPRKTAEISSTALRSSPIMRKKVSLNTYTP	TAEISS(0.001)T(0.005)ALRS(0.591)S(0.403)PIMR	1	18.3759	18.2736	18.0967	18.5317	18.3728	18.5297	18.5044	18.3392	18.121	18.3997	18.1625	NaN	NaN	NaN	NaN	NaN	NaN	NaN	NaN	NaN	NaN	NaN	16.7432	16.9619	16.8359	16.6997	16.7491	16.9471	16.907	16.7664	16.5976	16.9508	16.7498	NaN	NaN	NaN	NaN	NaN	NaN	NaN	NaN	NaN	NaN	NaN
PPIP5K2	Inositol hexakisphosphate and diphosphoinositol-pentakisphosphate kinase 2	1207	VPRKTAEISSTALRSSPIMRKKVSLNTYTPA	TAEISST(0.003)ALRS(0.028)S(0.969)PIMR	1	21.9585	21.9789	21.9765	21.9739	22.0159	22.3142	22.015	21.9123	22.0585	22.0341	21.7915	21.9617	22.0534	21.9173	22.0573	22.0729	22.27	22.1637	22.0405	22.0288	22.0622	21.8815	19.0475	19.0705	19.2213	19.0214	19	19.1571	19.0469	19.005	19.0442	19.1363	19.0146	22.1932	22.1069	22.3129	22.0579	22.0777	22.31	22.2718	22.0488	22.1066	22.4479	22.0982
PPIP5K2	Inositol hexakisphosphate and diphosphoinositol-pentakisphosphate kinase 2	493	KVQLTYLPHGCPKTSSEEEDSRREEPSLLLV	T(0.132)S(0.132)S(0.733)EEEDS(0.004)RREEPSLLLVLK	1	NaN	NaN	NaN	NaN	NaN	NaN	NaN	NaN	NaN	NaN	NaN	NaN	NaN	NaN	NaN	NaN	NaN	NaN	NaN	NaN	NaN	NaN	NaN	NaN	NaN	NaN	NaN	NaN	NaN	NaN	NaN	NaN	NaN	NaN	NaN	NaN	NaN	NaN	NaN	NaN	NaN	NaN	NaN	NaN
BCL9L	B-cell CLL/lymphoma 9-like protein	51	KGVGAGNHGAKANQISPSNSSLKNPQAGVPP	ANQIS(0.994)PS(0.005)NSSLK	1	16.9684	16.9934	16.8607	16.9386	16.8419	17.1775	17.2695	17.0407	17.3195	17.0969	17.1455	18.1314	18.0007	17.9706	18.1018	18.1154	18.2172	18.4237	17.9948	18.3917	18.2777	18.2791	18.2453	17.7318	17.6339	17.7807	17.6424	18.1367	18.2219	17.9977	18.0583	18.2829	18.1356	18.8973	18.8647	18.6854	18.6326	18.4998	19.0315	19.0181	18.8605	18.808	18.993	18.6814
BCL9L	B-cell CLL/lymphoma 9-like protein	53	VGAGNHGAKANQISPSNSSLKNPQAGVPPFS	ANQIS(0.348)PS(0.651)NS(0.001)SLK	1	NaN	NaN	NaN	NaN	NaN	NaN	NaN	NaN	NaN	NaN	NaN	NaN	NaN	NaN	NaN	NaN	NaN	NaN	NaN	NaN	NaN	NaN	NaN	NaN	NaN	NaN	NaN	NaN	NaN	NaN	NaN	NaN	NaN	NaN	NaN	NaN	NaN	NaN	NaN	NaN	NaN	NaN	NaN	NaN
BCL9L	B-cell CLL/lymphoma 9-like protein	897	ISINQMGSPGMGHLKSPTLSQVHSPLVTSPS	S(0.898)PT(0.048)LS(0.048)QVHS(0.005)PLVTSPSANLK	1	15.8952	16.0216	16.0251	15.7638	15.5914	15.5688	15.5417	15.9734	15.8683	15.8786	15.7539	16.079	16.8932	16.5456	16.5701	16.3974	15.3662	16.5207	16.6533	16.6334	16.6914	16.434	NaN	NaN	NaN	NaN	NaN	NaN	NaN	NaN	NaN	NaN	NaN	NaN	NaN	NaN	NaN	NaN	NaN	NaN	NaN	NaN	NaN	NaN
BCL9L	B-cell CLL/lymphoma 9-like protein	81	PFSSLKGKVKRDRSVSVDSGEQREAGTPSLD	S(0.165)VS(0.811)VDS(0.018)GEQREAGT(0.004)PS(0.001)LDSEAK	1	18.2849	17.7462	17.8317	17.7297	17.9963	17.786	18.0638	17.9137	18.157	18.2773	18.0666	NaN	NaN	NaN	NaN	NaN	NaN	NaN	NaN	NaN	NaN	NaN	NaN	NaN	NaN	NaN	NaN	NaN	NaN	NaN	NaN	NaN	NaN	NaN	NaN	NaN	NaN	NaN	NaN	NaN	NaN	NaN	NaN	NaN
BCL9L	B-cell CLL/lymphoma 9-like protein	980	VPSPGWVASPKTAMPSPGVSQNKQPPLNMNS	TAMPS(1)PGVSQNK	1	17.2535	17.3704	17.3361	17.087	17.1219	17.6465	17.3409	17.3495	17.6207	17.5498	17.1812	17.6286	17.5176	17.3658	17.4969	17.5463	17.6929	17.8824	17.7379	17.9974	17.6096	17.784	16.623	16.4466	16.2127	16.558	16.5311	16.4503	16.4625	16.5453	16.3459	16.1165	16.4354	NaN	NaN	NaN	NaN	NaN	NaN	NaN	NaN	NaN	NaN	NaN
SBDS	Ribosome maturation protein SBDS	2	______________MSIFTPTNQIRLTNVAV	S(0.792)IFT(0.207)PT(0.001)NQIR	1	NaN	NaN	NaN	NaN	NaN	NaN	NaN	NaN	NaN	NaN	NaN	NaN	NaN	NaN	NaN	NaN	NaN	NaN	NaN	NaN	NaN	NaN	NaN	NaN	NaN	NaN	NaN	NaN	NaN	NaN	NaN	NaN	NaN	NaN	NaN	NaN	NaN	NaN	NaN	NaN	NaN	NaN	NaN	NaN
PTEN	Phosphatidylinositol 3,4,5-trisphosphate 3-phosphatase and dual-specificity protein phosphatase PTEN	103	FIPGPEETSEKVENGSLCDQEIDSICSIERA	VENGS(1)LCDQEIDSICSIERADNDK	1	NaN	NaN	NaN	NaN	NaN	NaN	NaN	NaN	NaN	NaN	NaN	17.6634	18.0548	17.7344	18.1255	18.45	17.4386	17.7578	18.14	18.6002	17.9185	18.1157	18.7349	18.8326	18.9181	18.7837	18.7013	18.6068	18.5171	18.6965	18.7482	18.4618	18.8304	18.8999	18.8337	19.1174	19.1116	19.0667	18.9938	18.4975	19.1751	19.101	18.4428	18.9456
EAPP	E2F-associated phosphoprotein	88	VATAPTRYYDDIYFDSDSEDEDRAVQVTKKK	YYDDIYFDS(1)DS(1)EDEDRAVQVTK	1;2	NaN	NaN	NaN	NaN	NaN	NaN	NaN	NaN	NaN	NaN	NaN	NaN	NaN	NaN	NaN	NaN	NaN	NaN	NaN	NaN	NaN	NaN	NaN	NaN	NaN	NaN	NaN	NaN	NaN	NaN	NaN	NaN	NaN	NaN	NaN	NaN	NaN	NaN	NaN	NaN	NaN	NaN	NaN	NaN
RYR3	Ryanodine receptor 3	3432	PAVKWQLNLYKDVLKSEEPFNPEKTVERVQR	DVLKS(1)EEPFNPEK	1	NaN	NaN	NaN	NaN	NaN	NaN	NaN	NaN	NaN	NaN	NaN	NaN	NaN	NaN	NaN	NaN	NaN	NaN	NaN	NaN	NaN	NaN	NaN	NaN	NaN	NaN	NaN	NaN	NaN	NaN	NaN	NaN	NaN	23.6798	23.7691	23.9285	23.6763	23.7483	23.8907	23.9677	23.5946	23.6738	24.0638	23.8673
SNAP47	Synaptosomal-associated protein 47	210	ELLEDALVLRSARTSSPAEKSCSVWHAG___	TSS(1)PAEK	1	19.431	20.2049	19.8295	19.7131	19.4888	19.4499	19.6041	19.0886	19.4025	19.4138	19.1648	23.1344	23.9733	23.4964	23.44	23.1279	23.3298	23.2985	22.6318	23.1474	23.0331	22.8348	19.3767	19.7247	19.4122	19.3192	19.0311	19.5008	19.233	18.9342	19.0657	19.1716	18.8817	22.5889	22.8962	22.5458	22.3967	22.1575	22.6655	22.4401	21.8467	22.162	22.3647	22.0089
RBM26	RNA-binding protein 26	797	LTKNITKLKDEVKAASPGRCLPKSIKTKTQM	AAS(1)PGRCLPK	1	21.3519	21.9571	21.7358	22.0022	21.5839	21.3972	21.6455	21.5103	21.8193	21.6287	21.7296	21.9445	22.6053	22.3207	22.4045	22.2659	21.9961	22.2483	22.0834	22.4683	22.3464	22.2943	NaN	NaN	NaN	NaN	NaN	NaN	NaN	NaN	NaN	NaN	NaN	NaN	NaN	NaN	NaN	NaN	NaN	NaN	NaN	NaN	NaN	NaN
RBM26	RNA-binding protein 26	621	VYWHREGSTQQLQTTSPKPLVQQPILPVVKQ	EGSTQQLQTTS(1)PK	1	18.1979	18.3376	18.4751	18.4043	17.9306	17.9467	18.7653	18.2925	18.3325	18.6226	18.4149	22.466	23.2992	22.8566	22.9632	22.5621	22.6483	22.8742	22.1568	22.5041	22.3406	22.3188	20.0885	20.4207	20.1586	20.2423	19.9224	20.3113	20.43	20.0033	19.9234	20.3369	20.0276	21.2253	21.6049	21.1821	21.2224	20.7951	21.3784	21.2239	20.7193	20.7727	20.9699	20.6411
RBM26	RNA-binding protein 26	127	KEEEREKKFSRRLNHSPPQSSSRYRENRSRD	LNHS(1)PPQSSSR	1	21.494	21.8188	21.8834	21.681	21.6766	21.5787	21.5363	21.4718	21.6949	21.532	21.5045	22.472	22.7522	22.7745	22.7434	22.751	22.6244	22.5935	22.5284	22.6606	22.4373	22.6364	21.843	22.0635	21.908	21.7861	21.7811	21.9792	21.6899	21.9165	21.4802	21.652	21.7966	22.3893	22.6448	22.531	22.6171	22.5471	22.6221	22.3302	22.6127	22.2673	22.3163	22.4115
RBM26	RNA-binding protein 26	132	EKKFSRRLNHSPPQSSSRYRENRSRDERKKD	RLNHS(0.03)PPQS(0.117)S(0.736)S(0.117)R	1	NaN	NaN	NaN	NaN	NaN	NaN	NaN	NaN	NaN	NaN	NaN	NaN	NaN	NaN	NaN	NaN	NaN	NaN	NaN	NaN	NaN	NaN	NaN	NaN	NaN	NaN	NaN	NaN	NaN	NaN	NaN	NaN	NaN	NaN	NaN	NaN	NaN	NaN	NaN	NaN	NaN	NaN	NaN	NaN
RBM26	RNA-binding protein 26	523	TKKTWFDKPNFNRTNSPGFQKKVQFGNENTK	TNS(1)PGFQK	1	19.5567	19.8505	19.6854	19.6594	19.4775	19.7639	19.7426	19.3595	19.4577	19.4898	19.3735	22.6454	23.3624	23.1109	23.0038	22.6315	22.7131	22.9576	22.2479	22.7541	22.6038	22.4431	22.4229	22.5113	22.1269	22.1248	21.8167	22.3404	22.3327	21.6934	21.6973	21.8418	21.6295	20.3026	20.6909	20.314	20.2414	20.0944	20.6331	20.5082	20.1551	20.2397	20.3834	20.1124
RBM26	RNA-binding protein 26	210	RDRDRSRTRSRSRTRSRERDLVKPKYDLDRT	S(1)RERDLVK	1	NaN	NaN	NaN	NaN	NaN	NaN	NaN	NaN	NaN	NaN	NaN	NaN	NaN	NaN	NaN	NaN	NaN	NaN	NaN	NaN	NaN	NaN	NaN	NaN	NaN	NaN	NaN	NaN	NaN	NaN	NaN	NaN	NaN	NaN	NaN	NaN	NaN	NaN	NaN	NaN	NaN	NaN	NaN	NaN
MARK1	Serine/threonine-protein kinase MARK1	524	RTTDRYVALQNGKDSSLTEMSVSSISSAGSS	DS(0.001)S(0.989)LT(0.011)EMSVSSISSAGSSVASAVPSARPR	1	NaN	NaN	NaN	NaN	NaN	NaN	NaN	NaN	NaN	NaN	NaN	NaN	NaN	NaN	NaN	NaN	NaN	NaN	NaN	NaN	NaN	NaN	17.9237	17.5313	17.5861	17.6953	17.6041	17.823	17.7958	17.8494	17.7722	17.3884	17.8381	18.7861	18.2397	18.5017	18.4406	18.4842	18.671	18.8683	18.7543	18.6829	18.4099	18.4868
MARK1	Serine/threonine-protein kinase MARK1	382	LLGRKPPEFEGGESLSSGNLCQRSRPSSDLN	KPPEFEGGES(0.011)LS(0.764)S(0.225)GNLCQR	1	NaN	NaN	NaN	NaN	NaN	NaN	NaN	NaN	NaN	NaN	NaN	NaN	NaN	NaN	NaN	NaN	NaN	NaN	NaN	NaN	NaN	NaN	NaN	NaN	NaN	NaN	NaN	NaN	NaN	NaN	NaN	NaN	NaN	NaN	NaN	NaN	NaN	NaN	NaN	NaN	NaN	NaN	NaN	NaN
MARK1	Serine/threonine-protein kinase MARK1	383	LGRKPPEFEGGESLSSGNLCQRSRPSSDLNN	KPPEFEGGES(0.002)LS(0.43)S(0.569)GNLCQR	1	NaN	NaN	NaN	NaN	NaN	NaN	NaN	NaN	NaN	NaN	NaN	17.7326	17.8671	18.123	18.0938	17.6446	18.5592	18.0785	18.1212	18.3262	18.2206	18.1808	NaN	NaN	NaN	NaN	NaN	NaN	NaN	NaN	NaN	NaN	NaN	NaN	NaN	NaN	NaN	NaN	NaN	NaN	NaN	NaN	NaN	NaN
MARK1;MARK4;MARK2;MARK3	Serine/threonine-protein kinase MARK1;Serine/threonine-protein kinase MARK2;MAP/microtubule affinity-regulating kinase 3;MAP/microtubule affinity-regulating kinase 4	215	SNEFTFGNKLDTFCGSPPYAAPELFQGKKYD;SNEFTLGSKLDTFCGSPPYAAPELFQGKKYD;SNEFTVGGKLDTFCGSPPYAAPELFQGKKYD;SNEFTVGNKLDTFCGSPPYAAPELFQGKKYD	LDTFCGS(1)PPYAAPELFQGK	1	15.565	16.2028	16.1653	16.4154	16.1097	15.7524	15.7814	15.7138	16.5372	15.9353	15.7593	18.404	18.8664	18.2971	18.6028	18.246	16.6219	18.2125	18.0232	18.2425	17.9728	17.9636	18.2297	18.2373	18.1947	18.1311	18.036	18.2739	17.9928	17.9221	17.9499	17.6049	17.792	17.5292	18.0731	17.8481	17.5004	17.2467	17.5922	17.3987	17.095	17.0613	16.3301	16.8434
MARK1	Serine/threonine-protein kinase MARK1	650	PSHETGAFAHARRGTSTGIISKITSKFVRRD	RGT(0.129)S(0.673)T(0.197)GIIS(0.001)K	1	18.9899	19.2525	19.225	19.2461	19.4769	19.4214	19.4444	19.8458	19.8002	19.4528	19.6322	NaN	NaN	NaN	NaN	NaN	NaN	NaN	NaN	NaN	NaN	NaN	NaN	NaN	NaN	NaN	NaN	NaN	NaN	NaN	NaN	NaN	NaN	NaN	NaN	NaN	NaN	NaN	NaN	NaN	NaN	NaN	NaN	NaN
MARK1	Serine/threonine-protein kinase MARK1	444	SIPPAVSYTKRPQANSVESEQKEEWDKDVAR	RPQANS(1)VESEQK	1	16.7452	16.4352	16.2405	16.6006	16.5345	15.8337	17.0837	16.4511	17.0573	16.9766	16.8307	NaN	NaN	NaN	NaN	NaN	NaN	NaN	NaN	NaN	NaN	NaN	NaN	NaN	NaN	NaN	NaN	NaN	NaN	NaN	NaN	NaN	NaN	18.5206	18.4087	18.5249	18.6505	18.3503	18.8011	18.5679	18.8278	18.351	18.5816	18.6537
MARK1	Serine/threonine-protein kinase MARK1	475	KLGSTTVGSKSEMTASPLVGPERKKSSTIPS	SEMTAS(1)PLVGPER	1	NaN	NaN	NaN	NaN	NaN	NaN	NaN	NaN	NaN	NaN	NaN	20.2136	19.9776	20.0589	20.5302	20.2253	20.383	20.7185	20.5445	20.7582	20.8311	20.6152	17.7502	17.7544	17.2511	17.3318	17.3832	18.1034	18.2482	17.5901	17.499	17.8092	17.6091	20.5669	20.5893	20.3105	20.3505	20.3459	20.9053	20.7538	20.6871	20.5731	20.8096	20.6238
MARK1	Serine/threonine-protein kinase MARK1	403	QRSRPSSDLNNSTLQSPAHLKVQRSISANQK	SRPSSDLNNSTLQS(1)PAHLK	1	17.7231	18.1374	17.8867	17.7865	17.6529	18.0736	17.8899	17.5815	17.7316	17.9035	17.6034	18.3473	18.6689	18.2437	18.1687	18.2425	18.3823	18.3623	17.9843	18.3653	18.5486	17.9935	NaN	NaN	NaN	NaN	NaN	NaN	NaN	NaN	NaN	NaN	NaN	18.5477	18.673	18.601	18.5152	18.1299	18.6282	18.7895	18.3533	18.4544	18.497	18.226
MARK1	Serine/threonine-protein kinase MARK1	613	ATPDRTRFPRGSSSRSTFHGEQLRERRSVAY	S(0.861)T(0.139)FHGEQLR	1	16.8588	17.2302	17.1579	17.0502	17.1637	16.728	17.2325	17.0796	17.3301	17.1742	16.7983	16.1482	16.3736	16.2307	16.4266	16.1906	16.3495	16.5586	15.9819	16.5372	16.2981	15.987	NaN	NaN	NaN	NaN	NaN	NaN	NaN	NaN	NaN	NaN	NaN	17.981	17.8351	18.1239	18.0572	17.8753	17.9732	17.8509	17.8153	17.8554	17.6882	17.8876
PRKCQ	Protein kinase C;Protein kinase C theta type	649	NEKPRLSFADRALINSMDQNMFRNFSFMNPG	ALINS(1)MDQNMFR	1	NaN	NaN	NaN	NaN	NaN	NaN	NaN	NaN	NaN	NaN	NaN	NaN	NaN	NaN	NaN	NaN	NaN	NaN	NaN	NaN	NaN	NaN	NaN	NaN	NaN	NaN	NaN	NaN	NaN	NaN	NaN	NaN	NaN	17.5124	17.4677	17.1285	17.0454	17.0239	16.9608	17.3793	17.1911	16.7016	17.6074	16.9245
PRKCQ	Protein kinase C;Protein kinase C theta type	640	CSNFDKEFLNEKPRLSFADRALINSMDQNMF	PRLS(1)FADR	1	19.2883	20.0679	19.5526	19.5321	19.8487	20.5076	20.0026	20.0273	20.215	19.8686	19.5151	18.5652	19.2334	18.7458	18.7552	19.2456	18.4094	19.1586	19.257	19.4998	19.0743	18.5701	18.2503	19.0669	18.8575	18.7748	18.7259	18.6714	19.1122	18.7554	18.9489	18.6117	18.8367	19.3884	20.0616	19.9464	19.8265	19.9584	19.8237	20.1685	19.7698	20.0178	19.5185	20.0975
PRKCQ	Protein kinase C;Protein kinase C theta type	659	RALINSMDQNMFRNFSFMNPGMERLIS____	NFS(1)FMNPGMER	1	17.4593	17.6122	17.565	17.7479	17.5218	17.8851	17.7925	17.6373	18.4368	17.8213	17.5097	18.0016	18.1082	18.0089	17.9952	17.9544	18.4596	18.4216	18.1155	19.013	18.4009	18.0968	18.4357	18.2602	18.3869	18.1053	17.9459	18.2041	18.44	18.0361	18.1721	18.2235	18.3188	18.3299	18.0129	18.4006	17.9079	17.8399	18.1152	18.447	18.0908	17.9973	17.9775	18.0728
TJP1	Tight junction protein ZO-1	1525	YQINNISTVPKAIPVSPSAVEEDEDEDGHTV	AIPVS(0.979)PS(0.021)AVEEDEDEDGHTVVATAR	1	18.7285	18.5074	18.6845	18.6416	18.7395	19.0636	18.7179	18.5075	19.0071	18.7952	18.4733	20.0475	19.8514	19.8699	19.9489	19.8926	20.2699	20.1311	20.065	20.067	19.8326	19.9362	NaN	NaN	NaN	NaN	NaN	NaN	NaN	NaN	NaN	NaN	NaN	22.2293	21.588	21.7576	21.863	21.9803	22.4598	22.4522	22.4122	22.3099	22.3362	22.4228
TJP1	Tight junction protein ZO-1	1527	INNISTVPKAIPVSPSAVEEDEDEDGHTVVA	AIPVS(0.451)PS(0.549)AVEEDEDEDGHTVVATAR	1	NaN	NaN	NaN	NaN	NaN	NaN	NaN	NaN	NaN	NaN	NaN	19.6814	19.4186	19.4867	19.5456	19.4697	19.7772	19.718	19.6487	19.6577	19.379	19.5496	21.8609	21.1774	20.9982	21.4285	21.5182	22.0171	22.0587	21.9103	21.9711	21.9955	21.9886	NaN	NaN	NaN	NaN	NaN	NaN	NaN	NaN	NaN	NaN	NaN
TJP1	Tight junction protein ZO-1	1321	YSSKGKPPEADGVDRSFGEKRYEPIQATPPP	GKPPEADGVDRS(1)FGEK	1	17.4771	17.2375	16.7693	17.1318	16.9681	17.4078	17.6758	17.2564	17.5121	17.5214	17.3393	NaN	NaN	NaN	NaN	NaN	NaN	NaN	NaN	NaN	NaN	NaN	NaN	NaN	NaN	NaN	NaN	NaN	NaN	NaN	NaN	NaN	NaN	NaN	NaN	NaN	NaN	NaN	NaN	NaN	NaN	NaN	NaN	NaN
TJP1	Tight junction protein ZO-1	900	PYSPQAQPQPIHRIDSPGFKPASQQVYRKDP	IDS(1)PGFK	1	20.4361	20.7151	20.5489	20.6739	20.4498	20.658	20.9163	20.8229	20.9942	20.7402	21.0133	21.0021	21.2278	20.9494	21.0441	20.9592	21.3086	21.4085	21.3652	21.5662	21.246	21.5151	20.1073	19.7494	19.7839	19.855	19.662	20.3529	20.5552	20.2002	20.1346	20.2906	20.0961	21.5601	21.2247	21.3894	21.4023	21.2906	21.7934	22.1377	21.7122	21.5651	21.8641	21.5099
TJP1	Tight junction protein ZO-1	341	LRSRDEERISKPGAVSTPVKHADDHTPKTVE	PGAVS(0.751)T(0.249)PVK	1	NaN	NaN	NaN	NaN	NaN	NaN	NaN	NaN	NaN	NaN	NaN	NaN	NaN	NaN	NaN	NaN	NaN	NaN	NaN	NaN	NaN	NaN	18.989	18.9881	18.7212	18.85	18.5521	19.1222	19.0051	19.0091	19.0236	18.4116	18.7887	NaN	NaN	NaN	NaN	NaN	NaN	NaN	NaN	NaN	NaN	NaN
TJP1	Tight junction protein ZO-1	605	WRFRGLRSSKRNLRKSREDLSAQPVQTKFPA	S(1)REDLSAQPVQTK	1	22.5507	22.3403	22.169	22.2195	22.261	22.615	22.7765	22.827	22.8816	22.8528	22.9647	23.7143	23.5077	23.3774	23.5266	23.5467	23.7833	24.0043	24.0491	24.155	23.9909	24.17	22.6307	22.3233	22.217	22.1643	22.2106	22.7341	22.7972	22.7182	22.723	22.8015	22.8112	23.8486	23.5317	23.4151	23.5229	23.4307	23.8949	24.0217	24.0494	23.8995	23.9357	24.0005
TJP1	Tight junction protein ZO-1	610	LRSSKRNLRKSREDLSAQPVQTKFPAYERVV	S(0.19)REDLS(0.81)AQPVQTK	1	NaN	NaN	NaN	NaN	NaN	NaN	NaN	NaN	NaN	NaN	NaN	21.5602	21.4314	21.5614	21.5759	21.6414	21.4433	21.6954	21.7252	21.9313	21.7574	21.726	NaN	NaN	NaN	NaN	NaN	NaN	NaN	NaN	NaN	NaN	NaN	19.9734	20.0697	19.9861	20.019	19.8936	20.1286	20.443	20.1726	20.1371	20.6827	20.1793
TJP1	Tight junction protein ZO-1	113	KKVQIPVSRPDPEPVSDNEEDSYDEEIHDPR	KVQIPVSRPDPEPVS(1)DNEEDS(0.252)Y(0.748)DEEIHDPR	1;2	18.7566	19.4587	19.3261	19.3202	19.0581	19.027	18.9647	18.9396	18.7593	18.8532	18.8241	20.2118	21.1167	21.1441	20.9482	20.5386	20.0988	20.4609	20.1043	20.5592	20.446	20.442	19.9333	20.544	20.4781	20.5476	20.3376	20.0705	19.9936	20.0975	19.9035	19.9496	19.9164	21.4678	22.1873	22.0585	21.9347	21.8338	21.6049	21.615	21.4564	21.2653	21.3839	21.4238
TJP1	Tight junction protein ZO-1	119	VSRPDPEPVSDNEEDSYDEEIHDPRSGRSGV	VQIPVS(0.002)RPDPEPVS(0.997)DNEEDS(0.999)Y(0.001)DEEIHDPRSGR	1;2	NaN	NaN	NaN	NaN	NaN	NaN	NaN	NaN	NaN	NaN	NaN	NaN	NaN	NaN	NaN	NaN	NaN	NaN	NaN	NaN	NaN	NaN	18.2281	18.2096	18.2473	18.1436	18.229	18.5229	18.1004	18.5618	18.2487	18.1783	18.2704	NaN	NaN	NaN	NaN	NaN	NaN	NaN	NaN	NaN	NaN	NaN
TJP1	Tight junction protein ZO-1	1096	PEAQPHPSAGPKPAESKQYFEQYSRSYEQVP	PEAQPHPS(0.088)AGPKPAES(0.912)K	1	17.302	17.1798	17.4919	17.3962	17.5223	19.9419	17.4802	17.4122	17.8066	17.4585	17.4722	NaN	NaN	NaN	NaN	NaN	NaN	NaN	NaN	NaN	NaN	NaN	NaN	NaN	NaN	NaN	NaN	NaN	NaN	NaN	NaN	NaN	NaN	NaN	NaN	NaN	NaN	NaN	NaN	NaN	NaN	NaN	NaN	NaN
TJP1	Tight junction protein ZO-1	390	PVYAQVGQPDVDLPVSPSDGVLPNSTHEDGI	PVYAQVGQPDVDLPVS(0.882)PS(0.117)DGVLPNSTHEDGILRPSMK	1	NaN	NaN	NaN	NaN	NaN	NaN	NaN	NaN	NaN	NaN	NaN	NaN	NaN	NaN	NaN	NaN	NaN	NaN	NaN	NaN	NaN	NaN	NaN	NaN	NaN	NaN	NaN	NaN	NaN	NaN	NaN	NaN	NaN	16.788	17.4186	16.6979	17.3112	16.9007	16.8836	16.6889	16.9542	16.5992	15.9945	16.4679
TJP1	Tight junction protein ZO-1	1019	DKQPYPSRPPFDNQHSQDLDSRQHPEESSER	QPYPSRPPFDNQHS(1)QDLDSR	1	18.9195	18.8744	18.7307	18.8312	18.9386	18.6528	18.8631	18.9543	18.9922	18.9489	18.7922	20.7251	20.0987	20.1678	20.1672	20.2626	20.6032	20.6871	20.5488	20.637	20.5959	20.4507	19.6235	19.5565	19.3323	19.3742	19.3649	19.8776	19.8427	19.8461	19.569	19.8079	19.5313	21.2449	20.9572	20.8188	20.6885	20.897	21.5121	21.3337	21.4534	21.2476	21.2099	21.2252
TJP1	Tight junction protein ZO-1	1186	SVLTRVKMFENKRSASLETKKDVNDTGSFKP	RS(0.007)AS(0.987)LET(0.007)KK	1	NaN	NaN	NaN	NaN	NaN	NaN	NaN	NaN	NaN	NaN	NaN	NaN	NaN	NaN	NaN	NaN	NaN	NaN	NaN	NaN	NaN	NaN	18.213	18.1437	18.1156	18.2083	18.1317	18.3928	18.4021	18.416	18.2168	18.3537	18.25	NaN	NaN	NaN	NaN	NaN	NaN	NaN	NaN	NaN	NaN	NaN
TJP1	Tight junction protein ZO-1	301	DHSGRSHDRPPRRSRSRSPDQRSEPSDHSRH	S(0.998)RS(0.998)PDQRS(0.801)EPS(0.183)DHS(0.02)R	1;2;3	NaN	NaN	NaN	NaN	NaN	NaN	NaN	NaN	NaN	NaN	NaN	NaN	NaN	NaN	NaN	NaN	NaN	NaN	NaN	NaN	NaN	NaN	12.7273	14.5578	14.0147	14.0766	14.4836	11.7749	12.6691	12.6569	13.2157	12.8513	13.365	NaN	NaN	NaN	NaN	NaN	NaN	NaN	NaN	NaN	NaN	NaN
TJP1	Tight junction protein ZO-1	303	SGRSHDRPPRRSRSRSPDQRSEPSDHSRHSP	S(0.998)RS(0.998)PDQRS(0.801)EPS(0.183)DHS(0.02)R	1;2;3	NaN	NaN	NaN	NaN	NaN	NaN	NaN	NaN	NaN	NaN	NaN	NaN	NaN	NaN	NaN	NaN	NaN	NaN	NaN	NaN	NaN	NaN	12.7273	14.5578	14.0147	14.0766	14.4836	11.7749	12.6691	12.6569	13.2157	12.8513	13.365	NaN	NaN	NaN	NaN	NaN	NaN	NaN	NaN	NaN	NaN	NaN
TJP1	Tight junction protein ZO-1	887	DSSGMHHENQTYPPYSPQAQPQPIHRIDSPG	SSEPVREDSSGMHHENQT(0.016)Y(0.001)PPY(0.004)S(0.98)PQAQPQPIHR	1	NaN	NaN	NaN	NaN	NaN	NaN	NaN	NaN	NaN	NaN	NaN	NaN	NaN	NaN	NaN	NaN	NaN	NaN	NaN	NaN	NaN	NaN	NaN	NaN	NaN	NaN	NaN	NaN	NaN	NaN	NaN	NaN	NaN	17.2292	17.6689	17.3635	17.5753	17.1298	17.3218	17.3667	17.6728	17.3622	17.4733	16.9739
TJP1	Tight junction protein ZO-1	163	SASRERSLSPRSDRRSVASSQPAKPTKVTLV	S(1)VASSQPAKPTK	1	NaN	NaN	NaN	NaN	NaN	NaN	NaN	NaN	NaN	NaN	NaN	15.5296	15.6957	15.1381	15.2911	15.454	15.973	15.6561	15.8246	15.6695	15.6923	15.9998	15.618	15.5431	15.4834	15.7377	15.4725	15.7344	15.9461	15.7012	15.1736	16.0066	15.665	16.4811	16.2228	16.4879	16.1913	16.1922	16.619	16.966	16.6506	16.3228	16.5254	16.4776
TJP1	Tight junction protein ZO-1	166	RERSLSPRSDRRSVASSQPAKPTKVTLVKSR	SVAS(0.5)S(0.5)QPAKPTK	1	NaN	NaN	NaN	NaN	NaN	NaN	NaN	NaN	NaN	NaN	NaN	NaN	NaN	NaN	NaN	NaN	NaN	NaN	NaN	NaN	NaN	NaN	15.7866	16.3012	16.3077	16.1693	15.9602	15.7896	16.0408	15.6332	15.7004	16.1626	15.7716	NaN	NaN	NaN	NaN	NaN	NaN	NaN	NaN	NaN	NaN	NaN
TJP1	Tight junction protein ZO-1	167	ERSLSPRSDRRSVASSQPAKPTKVTLVKSRK	SVAS(0.095)S(0.905)QPAKPTK	1	16.1622	16.8023	16.6171	16.7181	16.6025	16.6485	16.2924	16.2002	16.423	16.5039	16.5089	17.1335	17.852	17.5312	17.9276	17.7796	17.4694	17.3424	17.3206	17.6278	17.5381	17.3822	15.7866	16.3012	16.3077	16.1693	15.9602	15.7896	16.0408	15.6332	15.7004	16.1626	15.7716	17.0873	17.8445	17.6657	17.7343	17.4871	17.1833	17.4008	17.1977	17.1653	17.3312	17.2945
SLC4A1AP	Kanadaptin	476	EISERLKASSQVLSESPSQDSLDAFMSEMKS	ASSQVLS(0.012)ES(0.966)PS(0.022)QDSLDAFMSEMK	1	16.5446	16.9798	16.6662	16.6824	16.3802	16.7686	16.5823	16.323	16.4318	16.4509	16.1487	NaN	NaN	NaN	NaN	NaN	NaN	NaN	NaN	NaN	NaN	NaN	15.7434	16.059	15.8126	15.5509	15.5112	16.1575	15.89	15.389	15.6294	15.9996	15.1971	NaN	NaN	NaN	NaN	NaN	NaN	NaN	NaN	NaN	NaN	NaN
SLC4A1AP	Kanadaptin	658	THFKETQTHENMSQLSEEEQNKDYQDCSKTT	ETQTHENMSQLS(1)EEEQNK	1;2	19.2672	18.7618	18.679	18.9336	18.9925	19.0816	19.1704	18.9446	19.2441	19.1749	19.2765	NaN	NaN	NaN	NaN	NaN	NaN	NaN	NaN	NaN	NaN	NaN	17.7916	17.3537	17.2282	17.144	17.2707	17.6841	17.4322	17.6582	17.4267	17.5932	17.6118	18.9834	18.9567	18.6401	18.4972	18.8088	19.1536	18.6607	18.9724	18.6574	18.7422	18.9209
SLC4A1AP	Kanadaptin	28	SQDLSGDFKKPALPVSPAARSKAPASSSSNP	PALPVS(1)PAAR	1	20.244	20.8826	20.5266	20.4386	20.5446	20.4196	20.4734	20.3083	20.7407	20.4293	20.3738	21.2721	21.974	21.6565	21.5675	21.6396	21.5115	21.586	21.1871	21.7292	21.3536	21.3464	22.0355	22.4815	22.141	22.1498	22.0358	22.0571	22.0912	21.9205	21.9964	22.0313	22.0674	21.3286	21.5984	21.4051	21.3541	21.1774	21.387	21.2876	21.1053	21.1476	21.1338	21.1539
SLC4A1AP	Kanadaptin	258	KQQQILLEKKMLGEDSDEEEEMDTSERKINA	MLGEDS(1)DEEEEMDTSERK	1	24.2447	24.3778	24.4468	24.3318	24.3341	23.5162	24.3938	24.2623	24.5362	24.4591	24.4623	23.702	23.8891	23.945	23.8521	23.8512	23.2492	23.9968	23.8487	24.0224	23.9223	23.9626	24.3648	24.452	24.4541	24.3113	24.3558	24.4317	24.3477	24.5159	24.2252	24.3593	24.4681	24.11	24.1564	24.0673	24.1396	24.0153	24.1862	24.1234	24.1658	24.1217	24.1388	24.1808
SLC4A1AP	Kanadaptin	412	RKRKAKNWEDEDFYDSDDDTFLDRTGLIEKK	NWEDEDFYDS(1)DDDTFLDR	1	21.9942	22.0589	22.1805	22.1082	22.171	21.894	22.305	22.1901	22.3488	22.2724	22.3346	22.6961	22.9477	23.019	22.9412	22.8314	22.8138	23.0569	22.8303	23.0627	22.9983	23.0231	22.2071	22.2285	22.2981	22.1294	22.2006	22.2301	22.3751	22.3465	22.1793	22.9912	22.3415	22.201	21.9868	22.1764	22.1808	22.1517	22.1309	22.2779	22.2471	21.9823	22.2985	22.172
SLC4A1AP	Kanadaptin	89	FRSLQEEQSRPPTAVSSPGGPARAPPYQEPP	SLQEEQSRPPTAVS(0.617)S(0.382)PGGPAR	1	15.8706	16.3324	15.9854	16.1534	16.1528	16.3553	16.1186	15.9241	16.1703	15.9932	16.0182	NaN	NaN	NaN	NaN	NaN	NaN	NaN	NaN	NaN	NaN	NaN	17.1777	17.5153	17.4236	17.2878	17.1824	17.17	17.6491	17.2943	17.0738	17.7414	16.9586	NaN	NaN	NaN	NaN	NaN	NaN	NaN	NaN	NaN	NaN	NaN
SLC4A1AP	Kanadaptin	90	RSLQEEQSRPPTAVSSPGGPARAPPYQEPPW	SLQEEQSRPPTAVS(0.041)S(0.959)PGGPAR	1	18.8858	19.4844	19.1728	19.3061	19.0888	19.5866	19.3093	18.9837	19.1932	19.0763	18.9888	NaN	NaN	NaN	NaN	NaN	NaN	NaN	NaN	NaN	NaN	NaN	18.9645	19.1907	18.9908	18.904	18.7812	19.1096	19.1784	18.7507	18.4516	18.7473	18.3195	NaN	NaN	NaN	NaN	NaN	NaN	NaN	NaN	NaN	NaN	NaN
CENPE	Kinesin-like protein;Centromere-associated protein E	2568	RTLKREAHKQVTCENSPKSPKVTGTASKKKQ	QVTCENS(1)PK	1;2	16.4099	16.6115	16.6759	16.7879	16.9281	16.0457	15.9662	16.4253	16.365	16.4391	16.055	17.4933	17.7491	17.6765	17.5878	17.7509	17.2386	17.3671	17.5752	17.6315	17.5488	17.3606	18.5487	18.5719	19.0058	18.584	18.4406	18.1002	18.1697	18.0309	18.3416	18.1583	17.9586	18.3447	18.2576	18.7519	18.2398	18.4248	17.95	17.8611	17.8475	17.9679	17.8173	17.8204
CENPE	Kinesin-like protein;Centromere-associated protein E	2571	KREAHKQVTCENSPKSPKVTGTASKKKQITP	QVTCENS(1)PKS(1)PK	1;2	NaN	NaN	NaN	NaN	NaN	NaN	NaN	NaN	NaN	NaN	NaN	16.0127	17.0428	16.8942	17.0111	17.1536	17.9688	16.4953	16.673	16.7749	16.7183	16.7037	NaN	NaN	NaN	NaN	NaN	NaN	NaN	NaN	NaN	NaN	NaN	16.6307	17.7844	17.5538	17.4481	17.0956	16.2522	17.6761	16.8857	16.9254	18.6204	17.2954
CENPE	Kinesin-like protein;Centromere-associated protein E	2614	PKESPKSCFFDSRSKSLPSPHPVRYFDNSSL	S(0.955)LPS(0.045)PHPVR	1	NaN	NaN	NaN	NaN	NaN	NaN	NaN	NaN	NaN	NaN	NaN	NaN	NaN	NaN	NaN	NaN	NaN	NaN	NaN	NaN	NaN	NaN	17.9371	17.4962	17.9276	17.6904	17.544	17.4689	17.863	17.7363	17.7013	18.053	17.8479	NaN	NaN	NaN	NaN	NaN	NaN	NaN	NaN	NaN	NaN	NaN
CENPE	Kinesin-like protein;Centromere-associated protein E	2617	SPKSCFFDSRSKSLPSPHPVRYFDNSSLGLC	SLPS(1)PHPVR	1	17.1509	17.7708	17.3576	17.2575	17.107	17.1771	17.1324	17.037	17.3172	17.3359	17.0807	17.0192	17.7844	17.4285	17.7279	17.4798	16.9959	17.2464	17.2156	17.5844	17.3044	17.314	NaN	NaN	NaN	NaN	NaN	NaN	NaN	NaN	NaN	NaN	NaN	17.4752	17.4608	17.4665	17.4556	17.197	17.1805	17.3506	17.3074	17.2337	17.2737	17.0749
PBX1;PBX3	Pre-B-cell leukemia transcription factor 3;Pre-B-cell leukemia transcription factor 1	88	HVMNLLREQSRTRPISPKEIERMVS______	T(0.006)RPIS(0.994)PK	1	17.7301	18.0073	17.7716	17.8537	17.7955	17.2559	17.8251	17.9336	17.7786	17.9052	17.5878	NaN	NaN	NaN	NaN	NaN	NaN	NaN	NaN	NaN	NaN	NaN	NaN	NaN	NaN	NaN	NaN	NaN	NaN	NaN	NaN	NaN	NaN	NaN	NaN	NaN	NaN	NaN	NaN	NaN	NaN	NaN	NaN	NaN
SP8;SP9	Transcription factor Sp8;Transcription factor Sp9	303	AAAAGGSSARSARRYSGRATCDCPNCQEAER;SAPLGGSPRSSARRYSGRATCDCPNCQEAER	RY(0.002)S(0.946)GRAT(0.052)CDCPNCQEAER	1	NaN	NaN	NaN	NaN	NaN	NaN	NaN	NaN	NaN	NaN	NaN	NaN	NaN	NaN	NaN	NaN	NaN	NaN	NaN	NaN	NaN	NaN	NaN	NaN	NaN	NaN	NaN	NaN	NaN	NaN	NaN	NaN	NaN	NaN	NaN	NaN	NaN	NaN	NaN	NaN	NaN	NaN	NaN	NaN
KDM6A	Lysine-specific demethylase 6A	1010	SLREENEKRSHHKDHSDSESTSSDNSGRRRK	DHS(0.996)DS(0.004)ESTSSDNSGRR	1	17.4287	16.9369	16.9623	17.0603	17.3239	17.0557	17.5272	17.6943	17.3731	17.5802	17.4745	17.5866	16.7185	17.2823	17.3997	17.492	16.9505	17.4612	17.554	17.5447	17.3825	17.5104	16.2458	15.9412	15.6018	15.8654	16.1452	16.5868	16.2546	16.3316	15.8369	15.7253	15.9703	17.6845	17.4687	17.0076	17.3608	17.6407	17.6536	17.2981	17.9768	16.8514	17.3338	17.2687
KDM6A	Lysine-specific demethylase 6A	1012	REENEKRSHHKDHSDSESTSSDNSGRRRKGP	DHS(0.287)DS(0.713)ESTSSDNSGRR	1	NaN	NaN	NaN	NaN	NaN	NaN	NaN	NaN	NaN	NaN	NaN	NaN	NaN	NaN	NaN	NaN	NaN	NaN	NaN	NaN	NaN	NaN	15.6262	15.4791	14.7104	15.2114	15.3729	15.9747	15.5039	15.5013	15.1344	14.9562	15.2555	NaN	NaN	NaN	NaN	NaN	NaN	NaN	NaN	NaN	NaN	NaN
KDM6A	Lysine-specific demethylase 6A	710	GLPNHVHQMTADAVCSPSHGDSKSPGLLSSD	HTGETPNSTASVEGLPNHVHQMTADAVCS(0.97)PS(0.029)HGDSK	1	17.0656	17.4756	17.2883	17.1052	17.3812	17.5661	17.0573	17.1518	16.8512	17.2339	16.8228	NaN	NaN	NaN	NaN	NaN	NaN	NaN	NaN	NaN	NaN	NaN	NaN	NaN	NaN	NaN	NaN	NaN	NaN	NaN	NaN	NaN	NaN	NaN	NaN	NaN	NaN	NaN	NaN	NaN	NaN	NaN	NaN	NaN
KDM6A;UTY		422	SQVDDLSSPAKRKRTSSPTKNTSDNWSGGHA	RT(0.183)S(0.72)S(0.097)PTK	1	NaN	NaN	NaN	NaN	NaN	NaN	NaN	NaN	NaN	NaN	NaN	18.7558	18.755	18.7975	18.6805	18.8225	16.1037	18.9972	18.9011	19.0406	18.8177	18.8405	NaN	NaN	NaN	NaN	NaN	NaN	NaN	NaN	NaN	NaN	NaN	19.7377	19.6743	19.7088	19.6429	19.6646	19.8476	19.392	19.6171	19.7285	18.837	19.4684
KDM6A;UTY		423	QVDDLSSPAKRKRTSSPTKNTSDNWSGGHAV	RT(0.108)S(0.108)S(0.757)PT(0.027)K	1	19.5777	19.6171	19.6789	19.574	19.8293	17.5914	19.7807	19.6123	19.9115	19.7519	19.8129	NaN	NaN	NaN	NaN	NaN	NaN	NaN	NaN	NaN	NaN	NaN	18.6222	18.6368	18.6986	18.522	18.5638	18.6327	18.1375	18.5305	18.5354	17.5825	18.4992	19.765	19.6781	19.675	19.5026	19.5551	19.7208	19.2941	19.5946	19.6038	18.6688	19.6442
KDM6A	Lysine-specific demethylase 6A	718	MTADAVCSPSHGDSKSPGLLSSDNPQLSALL	S(0.999)PGLLS(0.001)S(0.001)DNPQLSALLMGK	1	NaN	NaN	NaN	NaN	NaN	NaN	NaN	NaN	NaN	NaN	NaN	15.2192	14.1787	13.6308	14.8457	14.7685	14.3294	15.6114	15.482	15.8622	15.7016	15.7823	NaN	NaN	NaN	NaN	NaN	NaN	NaN	NaN	NaN	NaN	NaN	17.5722	15.8093	15.9342	16.5783	16.9038	17.9618	17.4634	18.2403	18.128	16.9838	17.9756
KDM6A	Lysine-specific demethylase 6A	730	DSKSPGLLSSDNPQLSALLMGKANNNVGTGT	S(0.083)PGLLS(0.002)S(0.019)DNPQLS(0.896)ALLMGK	1	NaN	NaN	NaN	NaN	NaN	NaN	NaN	NaN	NaN	NaN	NaN	NaN	NaN	NaN	NaN	NaN	NaN	NaN	NaN	NaN	NaN	NaN	15.945	15.4512	15.438	15.4176	15.5366	16.0469	15.8812	16.2101	16.0837	16.259	16.0791	NaN	NaN	NaN	NaN	NaN	NaN	NaN	NaN	NaN	NaN	NaN
KDM6A	Lysine-specific demethylase 6A	767	IHPAVHTKTDNSVASSPSSAISTATPSPKST	TDNSVAS(0.017)S(0.95)PS(0.026)S(0.007)AISTATPSPK	1	NaN	NaN	NaN	NaN	NaN	NaN	NaN	NaN	NaN	NaN	NaN	17.5343	17.4733	17.5285	17.471	17.6803	17.5077	17.5132	17.4126	17.6831	17.5722	17.4916	NaN	NaN	NaN	NaN	NaN	NaN	NaN	NaN	NaN	NaN	NaN	NaN	NaN	NaN	NaN	NaN	NaN	NaN	NaN	NaN	NaN	NaN
KDM6A	Lysine-specific demethylase 6A	773	TKTDNSVASSPSSAISTATPSPKSTEQTTTN	TDNSVASSPSSAIS(0.726)T(0.106)AT(0.106)PS(0.062)PK	1	NaN	NaN	NaN	NaN	NaN	NaN	NaN	NaN	NaN	NaN	NaN	NaN	NaN	NaN	NaN	NaN	NaN	NaN	NaN	NaN	NaN	NaN	17.811	18.192	18.2505	18.1384	17.8979	17.9354	18.1847	17.9596	17.832	17.9356	18.1116	NaN	NaN	NaN	NaN	NaN	NaN	NaN	NaN	NaN	NaN	NaN
KDM6A	Lysine-specific demethylase 6A	778	SVASSPSSAISTATPSPKSTEQTTTNSVTSL	TDNSVASSPSSAISTAT(0.005)PS(0.995)PK	1	NaN	NaN	NaN	NaN	NaN	NaN	NaN	NaN	NaN	NaN	NaN	18.4418	18.685	19.1019	18.8539	18.9485	18.465	18.7948	18.8429	18.9472	18.6877	18.904	NaN	NaN	NaN	NaN	NaN	NaN	NaN	NaN	NaN	NaN	NaN	19.6662	19.9596	20.0633	19.718	19.759	19.7117	19.7975	19.7192	19.5929	19.66	19.7127
SNX12	Sorting nexin-12	73	LPIFKLKESCVRRRYSDFEWLKNELERDSKI	RRYS(1)DFEWLK	1	18.7665	18.9051	18.9675	18.961	18.9111	19.1248	19.03	18.8834	18.967	18.8565	18.8298	19.4834	19.8541	19.6903	20.0154	19.8357	19.9386	19.8882	19.6587	20.1646	19.7766	19.8817	NaN	NaN	NaN	NaN	NaN	NaN	NaN	NaN	NaN	NaN	NaN	NaN	NaN	NaN	NaN	NaN	NaN	NaN	NaN	NaN	NaN	NaN
ZMIZ2	Zinc finger MIZ domain-containing protein 2	356	NPTPPMTPSSSVPYMSPNQEVKSPFLPDLKP	SIPGYPSSPLPGNPT(0.005)PPMT(0.004)PS(0.02)S(0.114)S(0.114)VPY(0.16)MS(0.583)PNQEVK	1	NaN	NaN	NaN	NaN	NaN	NaN	NaN	NaN	NaN	NaN	NaN	NaN	NaN	NaN	NaN	NaN	NaN	NaN	NaN	NaN	NaN	NaN	NaN	NaN	NaN	NaN	NaN	NaN	NaN	NaN	NaN	NaN	NaN	NaN	NaN	NaN	NaN	NaN	NaN	NaN	NaN	NaN	NaN	NaN
2008-09-01	Septin-8	18	ATDLERFSNAEPEPRSLSLGGHVGFDSLPDQ	S(0.555)LS(0.445)LGGHVGFDSLPDQLVSK	1	NaN	NaN	NaN	NaN	NaN	NaN	NaN	NaN	NaN	NaN	NaN	NaN	NaN	NaN	NaN	NaN	NaN	NaN	NaN	NaN	NaN	NaN	16.3545	16.8407	16.691	16.5165	16.411	16.4365	16.4373	16.5228	16.2714	16.5065	16.4137	NaN	NaN	NaN	NaN	NaN	NaN	NaN	NaN	NaN	NaN	NaN
2008-09-01	Septin-8	20	DLERFSNAEPEPRSLSLGGHVGFDSLPDQLV	S(0.177)LS(0.822)LGGHVGFDS(0.001)LPDQLVSK	1	17.3247	17.3878	17.3954	17.2298	17.2746	17.0825	17.2046	17.2898	17.2494	17.182	17.0368	NaN	NaN	NaN	NaN	NaN	NaN	NaN	NaN	NaN	NaN	NaN	NaN	NaN	NaN	NaN	NaN	NaN	NaN	NaN	NaN	NaN	NaN	NaN	NaN	NaN	NaN	NaN	NaN	NaN	NaN	NaN	NaN	NaN
SRCIN1	SRC kinase signaling inhibitor 1	1152	TPGASRLKAAQGQAGSPDKSKHGKQRAEYMR	AAQGQAGS(1)PDK	1	17.6067	18.135	18.1923	18.1153	17.8937	18.0404	18.0443	17.8477	17.9624	18.0817	17.9255	18.7867	19.1438	19.2482	19.2797	19.1908	19.5013	19.2514	19.1379	19.3554	19.1679	19.1858	17.6404	17.9414	17.8847	17.9193	17.6705	18.0199	18.0181	17.863	17.4644	18.0358	17.7804	19.22	19.4067	19.4728	19.4955	19.3707	19.6193	19.5561	19.2728	19.1158	19.4948	19.2736
SRCIN1	SRC kinase signaling inhibitor 1	556	QSFRKDSGSSSVFAESPGGKTRSAGSASTAG	DSGSSSVFAES(1)PGGK	1	17.3202	17.6691	17.5513	17.899	17.4481	17.7684	17.7292	17.768	17.615	17.5986	17.5989	NaN	NaN	NaN	NaN	NaN	NaN	NaN	NaN	NaN	NaN	NaN	17.7383	18.254	18.0527	18.0826	17.707	18.2062	18.2224	17.9693	17.631	18.2172	17.9814	17.5649	17.7133	17.8165	17.8437	17.4596	17.6835	17.7124	17.5545	17.4096	17.6012	17.5111
SRCIN1	SRC kinase signaling inhibitor 1	199	AELPLGFSRMNRFRQSLPLSRSASQTKLRSP	FRQS(1)LPLSR	1	17.1092	17.2981	17.1379	17.3093	17.2379	17.2013	17.4093	17.1692	17.3275	17.3419	17.2848	NaN	NaN	NaN	NaN	NaN	NaN	NaN	NaN	NaN	NaN	NaN	NaN	NaN	NaN	NaN	NaN	NaN	NaN	NaN	NaN	NaN	NaN	17.9955	18.1837	18.2494	18.1214	17.8709	18.0758	18.1874	18.2581	18.047	18.7568	18.2254
SRCIN1	SRC kinase signaling inhibitor 1	876	RQVDEGVWPPPNNLLSQSPKKVTAETDFNKS	QVDEGVWPPPNNLLS(0.569)QS(0.431)PKK	1	18.3465	18.5427	18.419	18.5699	18.362	18.5543	18.7942	18.3351	18.5013	18.7457	18.6344	NaN	NaN	NaN	NaN	NaN	NaN	NaN	NaN	NaN	NaN	NaN	17.3832	17.5582	17.3668	17.3877	17.3047	17.9264	17.6895	17.5652	17.3874	17.9167	17.5888	NaN	NaN	NaN	NaN	NaN	NaN	NaN	NaN	NaN	NaN	NaN
SRCIN1	SRC kinase signaling inhibitor 1	878	VDEGVWPPPNNLLSQSPKKVTAETDFNKSVD	QVDEGVWPPPNNLLS(0.156)QS(0.844)PKK	1	NaN	NaN	NaN	NaN	NaN	NaN	NaN	NaN	NaN	NaN	NaN	NaN	NaN	NaN	NaN	NaN	NaN	NaN	NaN	NaN	NaN	NaN	NaN	NaN	NaN	NaN	NaN	NaN	NaN	NaN	NaN	NaN	NaN	18.8062	19.0584	18.7347	18.7034	18.6285	19.0823	19.0062	19.0602	18.7819	19.1832	19.0932
SRCIN1	SRC kinase signaling inhibitor 1	1021	GQKAAPRTEPSGRRGSDELTVPRYRTEKPSK	RGS(1)DELTVPR	1	17.2453	16.8212	16.9761	17.1612	17.0779	17.8476	17.3777	17.1397	17.3447	17.1926	17.0822	17.1555	16.8682	16.8595	17.1068	16.8624	17.9191	17.3517	17.3495	17.2181	17.2813	17.4714	NaN	NaN	NaN	NaN	NaN	NaN	NaN	NaN	NaN	NaN	NaN	17.1321	16.6745	16.55	16.7779	16.7575	17.5366	17.3661	17.5155	17.2511	17.374	17.3356
ACAP2	Arf-GAP with coiled-coil, ANK repeat and PH domain-containing protein 2	377	AYREKGDESEKLDKKSSPSTGSLDSGNESKE	KS(0.673)S(0.317)PS(0.009)TGSLDSGNESK	1	NaN	NaN	NaN	NaN	NaN	NaN	NaN	NaN	NaN	NaN	NaN	20.6515	20.474	20.3222	20.4047	20.4813	20.8618	21.1265	20.5443	20.6423	20.7181	20.5375	NaN	NaN	NaN	NaN	NaN	NaN	NaN	NaN	NaN	NaN	NaN	NaN	NaN	NaN	NaN	NaN	NaN	NaN	NaN	NaN	NaN	NaN
ACAP2	Arf-GAP with coiled-coil, ANK repeat and PH domain-containing protein 2	378	YREKGDESEKLDKKSSPSTGSLDSGNESKEK	KS(0.001)S(0.935)PS(0.057)T(0.006)GSLDSGNESK	1;2	18.6446	18.5603	18.3274	18.5005	18.3016	18.8331	19.0325	18.1884	18.6972	18.7589	18.4325	17.8241	17.631	17.2521	17.5181	17.5754	17.9875	18.0726	17.5213	17.7907	17.8845	17.5043	19.9101	19.796	19.6358	19.6614	19.5737	19.9958	20.0911	19.5875	19.5744	19.9749	19.6027	21.0192	20.8055	20.6869	20.6583	20.5505	21.1098	21.1528	20.6743	20.6486	21.0155	20.5278
ACAP2	Arf-GAP with coiled-coil, ANK repeat and PH domain-containing protein 2	383	DESEKLDKKSSPSTGSLDSGNESKEKLLKGE	SSPST(0.004)GS(0.996)LDSGNESK	1;2	18.7193	18.7227	18.4236	18.6186	18.4335	18.9555	18.9443	18.532	18.929	18.7597	18.4601	19.3815	18.9727	18.4176	19.1836	19.0786	19.0437	19.448	19.6273	19.4103	19.4528	19.3498	NaN	NaN	NaN	NaN	NaN	NaN	NaN	NaN	NaN	NaN	NaN	18.4139	18.5648	18.2535	18.6839	18.3742	18.8274	18.6363	18.6752	18.5331	18.3774	18.6468
ACAP2	Arf-GAP with coiled-coil, ANK repeat and PH domain-containing protein 2	595	SANSLYEPEGERQDSSMFLDSKHLNPGLQLY	QDS(0.172)S(0.806)MFLDS(0.022)K	1	NaN	NaN	NaN	NaN	NaN	NaN	NaN	NaN	NaN	NaN	NaN	NaN	NaN	NaN	NaN	NaN	NaN	NaN	NaN	NaN	NaN	NaN	16.6434	17.3303	17.1623	16.9125	16.7141	16.6791	16.5888	16.5732	16.2131	16.5866	16.3094	NaN	NaN	NaN	NaN	NaN	NaN	NaN	NaN	NaN	NaN	NaN
ACAP2	Arf-GAP with coiled-coil, ANK repeat and PH domain-containing protein 2	518	RAKYVERKFVDKYSISLSPPEQQKKFVSKSS	YSIS(0.5)LS(0.5)PPEQQK	1	19.9277	20.0354	20.0518	20.0628	20.0526	19.3382	19.9188	19.8841	19.8973	19.8674	19.9011	NaN	NaN	NaN	NaN	NaN	NaN	NaN	NaN	NaN	NaN	NaN	NaN	NaN	NaN	NaN	NaN	NaN	NaN	NaN	NaN	NaN	NaN	NaN	NaN	NaN	NaN	NaN	NaN	NaN	NaN	NaN	NaN	NaN
ACAP2	Arf-GAP with coiled-coil, ANK repeat and PH domain-containing protein 2	520	KYVERKFVDKYSISLSPPEQQKKFVSKSSEE	YSISLS(1)PPEQQK	1	21.3277	21.5301	21.5339	21.6302	21.5538	21.3858	21.5084	21.5107	21.4559	21.4678	21.4273	22.3889	22.54	22.671	22.6937	22.6664	22.5646	22.5045	22.535	22.5451	22.5202	22.4586	19.3857	19.7749	19.8904	19.6743	19.5017	19.5797	19.9174	19.6351	19.6178	20.239	19.7692	22.4895	22.8746	22.8471	22.7408	22.6486	22.632	22.7237	22.5616	22.5131	22.5281	22.6172
KLF13	Krueppel-like factor 13	162	LRQRVRRGRSRADLESPQRKHKCHYAGCEKV	SRADLES(1)PQRK	1	18.2852	18.5451	18.4864	18.4438	18.4478	18.3231	18.569	18.4942	18.6356	18.5066	18.463	NaN	NaN	NaN	NaN	NaN	NaN	NaN	NaN	NaN	NaN	NaN	17.9683	18.1298	18.2617	18.0644	18.0356	18.1852	18.2868	18.13	17.8905	18.2765	18.0939	NaN	NaN	NaN	NaN	NaN	NaN	NaN	NaN	NaN	NaN	NaN
CADPS2	Calcium-dependent secretion activator 2	1288	SVSEGGGLQGITMKDSDEEEEG_________	LTVEEATASVSEGGGLQGITMKDS(1)DEEEEG	1	NaN	NaN	NaN	NaN	NaN	NaN	NaN	NaN	NaN	NaN	NaN	16.3546	17.1068	16.8041	17.2979	17.2522	17.7596	17.4219	17.3577	17.5129	17.1311	17.476	18.0448	18.0439	18.2846	17.873	18.0488	17.976	18.1305	18.1865	17.9684	18.3538	18.1988	16.7035	16.8836	17.165	16.2377	16.3038	16.4404	16.1094	16.925	16.5928	16.6084	16.6444
SOCS7	Suppressor of cytokine signaling 7	222	KGSFKIRLSRLFRTKSCNGGSGGGDGTGKRP	S(1)CNGGSGGGDGTGK	1	NaN	NaN	NaN	NaN	NaN	NaN	NaN	NaN	NaN	NaN	NaN	NaN	NaN	NaN	NaN	NaN	NaN	NaN	NaN	NaN	NaN	NaN	15.913	16.2002	16.317	15.9688	16.028	15.809	15.8661	16.097	15.6997	15.9439	16.0096	NaN	NaN	NaN	NaN	NaN	NaN	NaN	NaN	NaN	NaN	NaN
SOCS7		317	SPHPPTPPPPPRRSLSLLDAFPRIAPIRAAE	S(0.002)LS(0.998)LLDAFPR	1	17.3021	17.2837	17.3656	17.4481	17.3922	17.4418	17.3318	17.4359	17.6282	17.4702	17.3078	16.1796	15.8359	16.2186	16.1945	16.3127	16.8118	16.3515	16.2484	16.3229	16.3441	16.2916	16.8218	16.7536	16.9055	16.4979	16.4893	16.4092	16.3506	16.6605	16.7277	16.8353	16.6117	16.9456	17.3783	16.9439	16.894	17.0992	16.8074	16.5406	17.0092	16.7285	16.7094	16.8414
HUWE1		102	EEMETDMDVADVAMESSPGSSISMEHRLDVE	IQRPNTTQEGEEMETDMDVADVAMES(0.561)S(0.438)PGS(0.001)SISMEHR	1	NaN	NaN	NaN	NaN	NaN	NaN	NaN	NaN	NaN	NaN	NaN	NaN	NaN	NaN	NaN	NaN	NaN	NaN	NaN	NaN	NaN	NaN	NaN	NaN	NaN	NaN	NaN	NaN	NaN	NaN	NaN	NaN	NaN	18.7424	18.7715	18.4678	18.1497	18.2983	18.9375	18.6283	18.3789	18.1795	18.2861	18.3368
PARD3B;PARD3	Partitioning defective 3 homolog B;Partitioning defective 3 homolog	924	HRPRPHMVRGRGCNESFRAAIDKSYDGPEEI;HRPRPRIIRGRGCNESFRAAIDKSYDKPAVD	GCNES(1)FRAAIDK	1	19.6469	19.8429	19.8677	19.4363	19.7813	19.3521	19.7405	19.5083	19.9345	19.5046	19.541	19.6894	19.7801	19.9984	19.8235	19.8731	19.3772	19.8827	19.6898	20.0087	19.7291	19.7372	NaN	NaN	NaN	NaN	NaN	NaN	NaN	NaN	NaN	NaN	NaN	19.8883	20.2427	20.2852	19.8902	19.8449	19.6712	19.8405	19.9623	19.7678	20.2328	19.6113
PARD3B	Partitioning defective 3 homolog B	1048	MPAYQETGRPGPRGGSPDQYPYRTQDSRQKN	GGS(1)PDQYPYRTQDSR	1	17.5488	17.7471	17.5674	17.9472	17.9317	18.5383	17.8809	18.0549	18.3186	17.8939	17.7569	NaN	NaN	NaN	NaN	NaN	NaN	NaN	NaN	NaN	NaN	NaN	17.7029	17.6289	17.7658	17.8295	17.7433	18.0098	17.9681	18.2231	17.7183	17.7476	17.5578	NaN	NaN	NaN	NaN	NaN	NaN	NaN	NaN	NaN	NaN	NaN
PARD3B	Partitioning defective 3 homolog B	609	SPSKDFGPTLGLKKSSSLESLQTAVAEVRKN	KS(0.087)S(0.606)S(0.304)LES(0.003)LQTAVAEVRK	1	NaN	NaN	NaN	NaN	NaN	NaN	NaN	NaN	NaN	NaN	NaN	NaN	NaN	NaN	NaN	NaN	NaN	NaN	NaN	NaN	NaN	NaN	17.0985	17.4433	17.441	17.4864	17.4481	17.327	17.3037	17.5933	17.5041	16.9184	17.5353	NaN	NaN	NaN	NaN	NaN	NaN	NaN	NaN	NaN	NaN	NaN
PARD3B	Partitioning defective 3 homolog B	610	PSKDFGPTLGLKKSSSLESLQTAVAEVRKND	SSS(1)LESLQTAVAEVR	1	18.3603	18.5866	18.5977	18.6653	18.5361	19.8262	18.6116	18.569	18.8892	18.6769	18.6974	20.3052	20.3293	20.2748	20.4736	20.3543	20.4201	20.4509	20.251	20.3849	20.4035	20.3844	20.0309	19.9689	20.1138	20.0403	19.894	20.0006	19.7847	20.2782	19.7328	20.0413	20.0394	20.508	20.5672	20.6587	20.6614	20.5909	20.7108	20.6559	20.6527	20.3767	20.5377	20.6815
PARD3B	Partitioning defective 3 homolog B	613	DFGPTLGLKKSSSLESLQTAVAEVRKNDLPF	S(0.04)S(0.04)S(0.379)LES(0.541)LQTAVAEVRK	1	17.2139	17.5587	17.3387	17.5716	17.4458	16.5986	17.5635	17.3852	17.43	17.351	17.5634	NaN	NaN	NaN	NaN	NaN	NaN	NaN	NaN	NaN	NaN	NaN	NaN	NaN	NaN	NaN	NaN	NaN	NaN	NaN	NaN	NaN	NaN	NaN	NaN	NaN	NaN	NaN	NaN	NaN	NaN	NaN	NaN	NaN
PARD3B	Partitioning defective 3 homolog B	289	QQNKSPRVPRLGGKPSSPSLSPLMGFGSNKN	LGGKPS(0.5)S(0.407)PS(0.091)LS(0.002)PLMGFGSNK	1	17.893	18.0969	18.1355	18.3095	18.2978	18.2803	18.2082	18.3125	18.42	18.1698	18.3203	NaN	NaN	NaN	NaN	NaN	NaN	NaN	NaN	NaN	NaN	NaN	NaN	NaN	NaN	NaN	NaN	NaN	NaN	NaN	NaN	NaN	NaN	NaN	NaN	NaN	NaN	NaN	NaN	NaN	NaN	NaN	NaN	NaN
PARD3B	Partitioning defective 3 homolog B	499	SRRNDNSILHPLGTCSPQDKQKGLLLPNDGW	RNDNSILHPLGTCS(1)PQDK	1	NaN	NaN	NaN	NaN	NaN	NaN	NaN	NaN	NaN	NaN	NaN	18.8227	19.3119	19.1655	19.2855	19.2795	19.1948	18.7111	18.7284	19.1541	18.7103	18.8094	NaN	NaN	NaN	NaN	NaN	NaN	NaN	NaN	NaN	NaN	NaN	NaN	NaN	NaN	NaN	NaN	NaN	NaN	NaN	NaN	NaN	NaN
PARD3B	Partitioning defective 3 homolog B	574	TPARQPESINLKASKSMDLVPDESKVHSLAG	S(1)MDLVPDESK	1	NaN	NaN	NaN	NaN	NaN	NaN	NaN	NaN	NaN	NaN	NaN	20.7132	20.2751	20.1575	20.1662	20.34	20.6761	20.7296	20.6106	20.0747	20.4902	20.6257	NaN	NaN	NaN	NaN	NaN	NaN	NaN	NaN	NaN	NaN	NaN	21.6501	21.7649	21.0169	21.0836	21.6335	21.7499	21.4464	21.226	20.9413	21.1325	21.3684
PARD3B	Partitioning defective 3 homolog B	837	HFREPCTSANVFRSPSPPRAGPFGYPRDGHP	S(0.142)PS(0.857)PPRAGPFGYPR	1	NaN	NaN	NaN	NaN	NaN	NaN	NaN	NaN	NaN	NaN	NaN	17.4175	17.7677	17.6312	17.6707	17.6866	17.9644	17.8645	17.6908	18.0427	17.6637	17.8452	NaN	NaN	NaN	NaN	NaN	NaN	NaN	NaN	NaN	NaN	NaN	NaN	NaN	NaN	NaN	NaN	NaN	NaN	NaN	NaN	NaN	NaN
PARD3B	Partitioning defective 3 homolog B	272	ANLTGTDSPETDASASLQQNKSPRVPRLGGK	TANLTGTDSPET(0.002)DAS(0.089)AS(0.537)LQQNKS(0.372)PR	1	NaN	NaN	NaN	NaN	NaN	NaN	NaN	NaN	NaN	NaN	NaN	NaN	NaN	NaN	NaN	NaN	NaN	NaN	NaN	NaN	NaN	NaN	NaN	NaN	NaN	NaN	NaN	NaN	NaN	NaN	NaN	NaN	NaN	16.8007	17.0409	17.0204	16.9403	16.6604	16.923	17.4885	17.1959	17.039	17.9533	17.0004
PARD3B	Partitioning defective 3 homolog B	278	DSPETDASASLQQNKSPRVPRLGGKPSSPSL	TANLTGTDSPET(0.001)DAS(0.005)AS(0.041)LQQNKS(0.954)PR	1	NaN	NaN	NaN	NaN	NaN	NaN	NaN	NaN	NaN	NaN	NaN	NaN	NaN	NaN	NaN	NaN	NaN	NaN	NaN	NaN	NaN	NaN	16.0777	16.0117	16.2709	16.2936	16.1464	16.2348	17.4062	16.3977	16.2817	18.1796	16.4989	NaN	NaN	NaN	NaN	NaN	NaN	NaN	NaN	NaN	NaN	NaN
SREBF2	Sterol regulatory element-binding protein 2;Processed sterol regulatory element-binding protein 2	439	GSPLLDDAKVKDEPDSPPVALGMVDRSRILL	VKDEPDS(1)PPVALGMVDR	1	16.8258	16.7865	16.8482	16.8972	17.1195	17.6572	17.1929	16.9696	17.1744	17.2118	17.2769	17.5585	17.7949	17.9038	18.0059	17.9117	18.2519	17.8963	17.8801	18.3597	18.1262	18.228	NaN	NaN	NaN	NaN	NaN	NaN	NaN	NaN	NaN	NaN	NaN	NaN	NaN	NaN	NaN	NaN	NaN	NaN	NaN	NaN	NaN	NaN
CADM1	Cell adhesion molecule 1	404	DADTAIINAEGGQNNSEEKKEYFI_______	GADDAADADTAIINAEGGQNNS(1)EEKK	1	17.6841	17.9504	17.9888	17.9482	17.9968	18.0265	18.2521	18.6834	18.0235	18.9584	17.937	18.3608	18.2598	18.3811	17.8192	18.1041	18.5839	18.2642	18.5269	18.3223	19.2622	18.0902	19.4292	19.0838	18.8848	19.0762	19.0099	19.2601	19.7554	19.557	19.3574	19.5671	19.418	19.6193	18.9979	19.2226	19.2892	19.2295	19.3695	19.1903	19.9288	19.0388	19.6636	18.9726
SMAP1	Stromal membrane-associated protein 1	82	KLQKKDQQLEPKKSTSPKKAAEPTVDLLGLD;KLQKKDQQLEPKKSTSPKKAAEPTVDLLGLV	KST(0.014)S(0.986)PKK	1	18.4985	18.66	18.6488	18.8085	18.9557	21.0704	18.6616	18.4343	18.9409	18.7236	18.7024	NaN	NaN	NaN	NaN	NaN	NaN	NaN	NaN	NaN	NaN	NaN	18.329	18.6691	18.6991	18.5622	18.5403	18.5241	19.1414	18.4178	18.5549	19.8172	18.5912	20.0774	20.5483	20.5407	20.4008	20.4254	20.452	21.275	20.5671	20.5521	22.0357	20.7393
SMAP1	Stromal membrane-associated protein 1	27	TNISSSDAPLQPLVSSPSLQAAVDKNKLEKE	NAIAITNISSSDAPLQPLVS(0.141)S(0.835)PS(0.024)LQAAVDK	1	17.8597	18.1683	17.8062	17.8662	17.8757	18.2072	18.0612	17.905	18.3735	17.7393	17.8061	16.2986	16.8234	16.3258	16.3578	16.4471	16.934	16.647	16.2272	16.954	15.9006	16.5372	17.4292	17.2725	16.8143	16.7085	16.5585	17.1687	17.563	17.3873	16.8644	17.4375	17.4123	20.1793	20.3653	20.2997	20.1689	20.0413	20.3934	20.3946	19.9303	20.1236	20.2464	20.0072
PSME2	Proteasome activator complex subunit 2	10	______MAKPCGVRLSGEARKQAEEFLYRFL	PCGVRLS(1)GEARK	1	18.7366	19.7607	19.1937	19.2781	19.4605	18.7355	19.6803	19.3717	19.7789	19.4713	19.3482	19.1661	19.829	19.5629	19.4738	19.646	19.0981	19.8427	19.5912	19.7738	19.5898	19.4503	19.5376	20.1103	19.8625	19.882	19.7917	19.9355	20.1779	19.8664	19.9236	19.8507	19.8615	18.583	19.2743	18.9568	19.069	18.9101	19.0898	19.2965	19.0559	19.1751	18.758	19.0869
KIAA1033	WASH complex subunit 7	1158	EENQEKKEKEEETKTSNGDLSDSTVSADPVV	EKEEET(0.005)KT(0.123)S(0.872)NGDLSDSTVSADPVVK	1	19.9095	18.7379	17.789	18.5427	18.7608	19.7409	19.7884	20.0647	20.0013	19.9942	19.6891	NaN	NaN	NaN	NaN	NaN	NaN	NaN	NaN	NaN	NaN	NaN	20.3655	19.4835	19.0673	19.0582	19.1801	20.3158	20.2573	20.444	20.2649	20.3913	20.3311	NaN	NaN	NaN	NaN	NaN	NaN	NaN	NaN	NaN	NaN	NaN
MKL1;mkl1	MKL/myocardin-like protein 1	156	LEARVSEPLLSATSASPTQVVSQLPMGRDSR	VSEPLLSATS(0.007)AS(0.984)PT(0.008)QVVSQLPMGR	1	NaN	NaN	NaN	NaN	NaN	NaN	NaN	NaN	NaN	NaN	NaN	16.409	16.6081	16.3831	16.7918	16.5308	16.971	16.9719	16.6803	16.8249	16.3781	16.4448	14.7034	15.2115	14.8896	15.1088	14.9806	14.8539	14.8032	15.1287	15.3367	15.1872	14.9519	16.4312	16.5957	16.2659	16.4504	16.5261	16.7481	16.2723	16.6167	16.423	16.515	16.3858
PCDH7	Protocadherin-7	289	PNGQRYDSVNEKLSDSPSMGRYRSVNGGPGS	LSDS(1)PSMGR	1	20.5193	20.803	20.7142	20.5381	20.7623	20.808	21.0111	20.9811	21.0415	21.002	20.8797	21.1303	20.5205	20.7595	20.777	20.9947	21.3162	21.5387	21.4061	21.3031	21.2666	21.3273	20.9601	21.1058	21.274	21.0622	20.806	20.911	21.0706	21.1568	20.9723	21.0163	21.0526	20.0124	20.16	20.3506	20.0568	20.1225	19.7387	20.193	20.6247	20.0081	20.469	19.9848
PCDH7	Protocadherin-7	291	GQRYDSVNEKLSDSPSMGRYRSVNGGPGSPD	LSDS(0.29)PS(0.71)MGR	1	NaN	NaN	NaN	NaN	NaN	NaN	NaN	NaN	NaN	NaN	NaN	19.6636	19.9945	19.9834	19.869	19.7006	19.9072	20.1652	20.2751	20.1777	20.3186	20.053	NaN	NaN	NaN	NaN	NaN	NaN	NaN	NaN	NaN	NaN	NaN	NaN	NaN	NaN	NaN	NaN	NaN	NaN	NaN	NaN	NaN	NaN
PCDH7		514	SQPKLSTFMPVDERGSQEKLANGEAAIMGDR	LSTFMPVDERGS(1)QEK	1	18.267	17.5667	17.3869	17.4886	17.6444	18.9994	18.6847	18.7227	18.9293	18.7076	18.7119	20.0234	18.888	18.5075	19.022	18.6639	20.1962	20.2722	20.1746	20.3398	20.219	19.9259	18.3064	17.2807	17.0326	17.1614	17.034	17.9758	18.357	18.4108	18.2521	18.487	18.2855	18.0675	17.6488	17.2988	17.171	17.2283	17.8506	18.1607	17.9712	18.0857	18.1192	18.0873
PCDH7	Protocadherin-7	326	YKSSSPLPTVQLHPQSPTAGKKHQAVQDLPP	SSSPLPTVQLHPQS(0.998)PT(0.002)AGKK	1;2	18.539	18.8841	18.9039	18.9534	19.0315	19.0174	19.0076	19.0733	19.2601	18.9517	18.9635	19.1701	19.3974	19.2196	19.2991	19.4287	19.4434	19.7065	19.5628	19.6077	19.5755	19.3715	19.2494	19.5441	19.6465	19.5216	19.4565	19.3193	19.4639	19.545	19.4174	19.333	19.5549	20.6599	20.924	20.9762	20.8945	20.7962	20.7435	20.7611	20.9435	20.8776	20.4953	20.8064
PCDH7	Protocadherin-7	304	SPSMGRYRSVNGGPGSPDLARHYKSSSPLPT	SVNGGPGS(1)PDLAR	1	NaN	NaN	NaN	NaN	NaN	NaN	NaN	NaN	NaN	NaN	NaN	21.0931	20.987	20.8639	20.9727	21.0689	21.493	21.5092	21.4422	21.5928	21.3654	21.4756	14.5706	14.3169	14.2209	14.538	14.5674	14.475	14.8615	14.4998	14.7252	14.5566	14.5079	20.6317	20.4455	20.4518	20.4401	20.3725	20.7743	20.9152	20.8883	20.9552	20.6535	20.5262
SPAG9	C-Jun-amino-terminal kinase-interacting protein 4	479	AEAEDARQKAKDDDDSDIPTAQRKRFTRVEM	AKDDDDS(1)DIPTAQRK	1	20.5714	20.6364	20.4223	20.5704	20.4151	19.8488	20.7013	20.6523	20.7777	20.7134	20.565	20.2478	20.5701	20.4534	20.5675	20.6123	20.0544	20.4359	20.2968	20.367	20.1873	20.1686	19.7002	19.6475	19.2121	19.3195	19.3827	19.6328	19.6048	19.2467	19.4124	19.5241	19.4299	21.9786	21.8412	21.5482	21.5369	21.4379	21.7808	21.823	21.5946	21.5851	21.7428	21.6005
SPAG9	C-Jun-amino-terminal kinase-interacting protein 4	269	SQGGSKATTPASTANSDVATIPTDTPLKEEN	ATT(0.006)PAS(0.022)T(0.022)ANS(0.8)DVAT(0.15)IPTDTPLK	1	NaN	NaN	NaN	NaN	NaN	NaN	NaN	NaN	NaN	NaN	NaN	NaN	NaN	NaN	NaN	NaN	NaN	NaN	NaN	NaN	NaN	NaN	17.1505	16.9499	16.8546	16.8753	16.9956	17.5151	16.9965	17.1588	16.9916	16.7875	17.1386	NaN	NaN	NaN	NaN	NaN	NaN	NaN	NaN	NaN	NaN	NaN
SPAG9	C-Jun-amino-terminal kinase-interacting protein 4	258	HTSLKDELSDVSQGGSKATTPASTANSDVAT	DELSDVSQGGS(1)K	1	19.0459	19.0758	18.8957	19.0232	19.2961	17.7737	18.9214	18.9332	19.2432	19.0504	18.8455	19.8685	19.9288	19.937	20.3042	20.3117	19.0097	20.0891	19.8653	20.024	19.7588	19.8193	19.0201	18.9019	18.9356	18.8736	18.9015	18.6602	18.5568	18.7448	18.519	17.9557	18.7734	19.8261	19.6575	19.5149	19.6611	19.7417	19.389	19.3402	19.3649	19.1815	18.7166	19.4514
SPAG9	C-Jun-amino-terminal kinase-interacting protein 4	350	PELDMDKDLSGYKGSSTPTKGIENKAFDRNT	GS(0.006)S(0.926)T(0.068)PTK	1;2;3	20.989	20.8447	20.7726	20.8535	20.6811	20.928	21.1411	21.1257	21.2444	21.0085	21.2082	23.2256	23.035	23.008	23.2142	23.0801	23.1624	23.4775	23.4444	23.5191	23.3144	23.4256	NaN	NaN	NaN	NaN	NaN	NaN	NaN	NaN	NaN	NaN	NaN	26.6851	26.2939	26.3031	26.3488	26.4306	26.7674	26.8127	26.7833	26.5509	26.7763	26.7882
SPAG9	C-Jun-amino-terminal kinase-interacting protein 4	203	LESTAHSRIRKERPISLGIFPLPAGDGLLTP	ERPIS(1)LGIFPLPAGDGLLT(1)PDAQK	1;2	19.2722	18.2801	18.3215	18.2175	18.8858	18.5236	18.8105	19.1424	18.8155	19.217	18.4656	20.4859	19.47	19.4697	19.4037	20.193	19.6707	20.0151	20.4503	20.0924	20.568	19.7171	17.0904	16.954	17.175	16.7304	17.0607	17.1835	17.5642	16.7835	17.0281	17.4526	16.9078	NaN	NaN	NaN	NaN	NaN	NaN	NaN	NaN	NaN	NaN	NaN
SPAG9	C-Jun-amino-terminal kinase-interacting protein 4	229	GLLTPDAQKGGETPGSEQWKFQELSQPRSHT	GGET(1)PGS(1)EQWK	1;2	19.1471	18.7594	18.9257	18.8164	19.3172	17.8185	18.8117	18.6349	18.5475	19.0067	18.6026	NaN	NaN	NaN	NaN	NaN	NaN	NaN	NaN	NaN	NaN	NaN	NaN	NaN	NaN	NaN	NaN	NaN	NaN	NaN	NaN	NaN	NaN	NaN	NaN	NaN	NaN	NaN	NaN	NaN	NaN	NaN	NaN	NaN
SPAG9	C-Jun-amino-terminal kinase-interacting protein 4	804	VPGARETDYPAGEDLSESGQVDKASLCGSMT	ETDYPAGEDLS(0.991)ES(0.009)GQVDK	1	NaN	NaN	NaN	NaN	NaN	NaN	NaN	NaN	NaN	NaN	NaN	NaN	NaN	NaN	NaN	NaN	NaN	NaN	NaN	NaN	NaN	NaN	NaN	NaN	NaN	NaN	NaN	NaN	NaN	NaN	NaN	NaN	NaN	NaN	NaN	NaN	NaN	NaN	NaN	NaN	NaN	NaN	NaN	NaN
SPAG9	C-Jun-amino-terminal kinase-interacting protein 4	806	GARETDYPAGEDLSESGQVDKASLCGSMTSN	ETDYPAGEDLS(0.002)ES(0.998)GQVDK	1	17.7933	18.157	17.702	17.6815	17.68	17.3564	17.6641	17.6029	17.6468	17.772	17.5986	17.7177	18.1236	18.3024	18.0706	17.9432	17.7138	17.902	17.7161	17.7055	17.6959	17.9387	18.3318	18.0975	17.7905	18.0224	17.5679	18.0678	18.002	17.8093	17.7951	18.1135	17.5965	17.5803	17.5784	17.569	17.388	17.3484	17.6173	17.4832	17.2185	17.4086	16.9405	16.8914
SPAG9	C-Jun-amino-terminal kinase-interacting protein 4	109	ALRKHAEEKFIEFEDSQEQEKKDLQTRVESL	FIEFEDS(1)QEQEKK	1	19.3098	19.0333	18.8142	18.9081	18.9072	19.736	19.3363	18.8374	19.1914	19.2535	18.8711	19.2706	19.2993	18.7569	18.9838	19.1488	18.9777	19.2662	19.3257	19.2635	19.2422	19.177	19.8801	19.5678	19.3712	19.3177	19.2496	19.6258	19.9608	19.2421	19.3766	20.2245	19.3671	20.5461	20.414	19.9895	20.0926	19.8529	20.4654	20.623	20.0364	19.9353	20.3678	20.0102
SPAG9	C-Jun-amino-terminal kinase-interacting protein 4	238	GGETPGSEQWKFQELSQPRSHTSLKDELSDV	FQELS(1)QPR	1	NaN	NaN	NaN	NaN	NaN	NaN	NaN	NaN	NaN	NaN	NaN	NaN	NaN	NaN	NaN	NaN	NaN	NaN	NaN	NaN	NaN	NaN	18.5954	18.5299	18.4911	18.4759	18.2259	18.6297	18.7197	18.4221	18.4111	18.5108	18.2285	18.2971	18.5302	18.1546	18.24	17.9271	18.5018	18.5947	18.1178	17.9236	18.3093	17.9834
SPAG9	C-Jun-amino-terminal kinase-interacting protein 4	245	EQWKFQELSQPRSHTSLKDELSDVSQGGSKA	SHT(0.029)S(0.971)LKDELSDVSQGGSK	1;4	NaN	NaN	NaN	NaN	NaN	NaN	NaN	NaN	NaN	NaN	NaN	18.705	19.222	18.9367	18.9201	18.8617	18.9953	18.7553	18.7292	18.6883	18.6446	18.5877	18.8086	19.1247	18.6746	18.545	18.7038	19.1076	18.8216	18.3825	18.4343	18.7933	18.8648	NaN	NaN	NaN	NaN	NaN	NaN	NaN	NaN	NaN	NaN	NaN
SPAG9;MAPK8IP3	C-Jun-amino-terminal kinase-interacting protein 4;C-Jun-amino-terminal kinase-interacting protein 3	1135	EPYVSKMLGTGKLGFSFVRITALLVAGSRLW;EPYVSKMLGTGKLGFSFVRITALMVSCNRLW	LGFS(1)FVR	1	18.3838	18.207	17.7635	17.8807	17.5193	18.1134	18.5332	17.2601	17.6482	18.2393	17.3941	17.4439	17.3419	16.8932	16.9785	16.6719	17.3943	17.7182	16.6196	17.132	17.2979	16.7169	17.982	17.6524	17.2478	17.5225	17.2512	18.0564	17.9156	16.8158	17.2609	17.9186	17.0897	NaN	NaN	NaN	NaN	NaN	NaN	NaN	NaN	NaN	NaN	NaN
SPAG9	C-Jun-amino-terminal kinase-interacting protein 4	183	HNYMEHLERTKLHQLSGSDQLESTAHSRIRK	LHQLS(1)GS(1)DQLESTAHSR	1;2	17.9984	18.683	18.1822	17.4532	17.7292	18.2573	17.9895	17.8177	18.0244	17.8246	17.6178	19.8614	19.385	18.7635	18.9287	19.2212	19.9391	19.5527	19.383	19.7032	19.5836	19.2982	19.112	19.1042	18.7927	18.7174	18.6131	19.4376	19.1181	18.9684	18.839	19.2901	18.7772	19.1679	20.3377	18.8313	19.2493	19.3544	19.2956	18.7345	18.7585	18.6993	18.6255	18.4603
SPAG9	C-Jun-amino-terminal kinase-interacting protein 4	185	YMEHLERTKLHQLSGSDQLESTAHSRIRKER	LHQLS(1)GS(1)DQLESTAHSR	1;2	15.9607	16.3349	16.3124	15.9413	16.0176	16.4259	15.8363	15.8029	16.153	16.2789	16.1465	NaN	NaN	NaN	NaN	NaN	NaN	NaN	NaN	NaN	NaN	NaN	16.5106	16.4074	16.4316	16.6972	16.4609	16.6145	16.4788	16.6056	16.5327	16.6614	16.3265	17.2824	18.1379	17.0737	17.3259	17.479	17.2144	16.7403	16.9327	16.434	16.8763	16.6971
SPAG9	C-Jun-amino-terminal kinase-interacting protein 4	315	SKHIEVQVAQETRNVSTGSAENEEKSEVQAI	NVS(0.997)T(0.003)GS(1)AENEEK	1;2	NaN	NaN	NaN	NaN	NaN	NaN	NaN	NaN	NaN	NaN	NaN	NaN	NaN	NaN	NaN	NaN	NaN	NaN	NaN	NaN	NaN	NaN	NaN	NaN	NaN	NaN	NaN	NaN	NaN	NaN	NaN	NaN	NaN	19.4057	19.404	19.302	19.1682	19.1305	20.0158	19.8259	19.7074	19.5224	19.6091	19.5366
SPAG9	C-Jun-amino-terminal kinase-interacting protein 4	318	IEVQVAQETRNVSTGSAENEEKSEVQAIIES	NVS(0.59)T(0.41)GS(1)AENEEK	1;2	20.6646	19.4256	19.2387	19.7444	19.8122	20.6863	20.7954	20.7546	20.9666	20.9166	20.8249	22.0111	20.7924	20.4773	21.048	21.0939	21.8357	22.132	21.8938	22.0507	22.0334	21.9185	21.5418	20.416	20.2833	20.6696	20.7066	21.3692	21.5073	21.4909	21.3698	21.4608	21.4279	22.9758	22.107	21.8168	22.2628	22.1521	22.9696	22.9929	22.7911	22.6176	22.8375	22.8014
SPAG9	C-Jun-amino-terminal kinase-interacting protein 4	721	DVAGLDTEGSKQRSASQSSLDKLDQELKEQQ	SAS(1)QSSLDK	1;2	18.0876	18.3167	18.4903	18.5378	18.4124	20.9263	18.3131	17.9692	18.3414	18.3451	18.2781	20.9359	21.2712	21.3787	21.3679	21.4324	21.945	21.218	21.119	21.1721	21.0775	21.1868	20.6346	20.881	20.8664	20.8746	20.7993	20.6333	20.8697	20.808	20.2763	20.4098	20.4622	20.6704	20.7144	20.8598	20.824	20.7072	20.7286	20.8998	20.5369	20.2896	20.3522	20.4056
SPAG9	C-Jun-amino-terminal kinase-interacting protein 4	723	AGLDTEGSKQRSASQSSLDKLDQELKEQQKE	SAS(0.001)QS(1)S(1)LDKLDQELK	1;2	NaN	NaN	NaN	NaN	NaN	NaN	NaN	NaN	NaN	NaN	NaN	22.2739	21.0013	20.4191	21.2117	21.1972	22.9999	22.5879	22.2213	22.4578	22.1037	22.327	15.8066	14.3369	13.7446	14.0861	14.5548	15.3414	15.0029	15.7152	15.1533	14.8973	15.451	21.7702	20.1325	19.5207	20.175	20.2825	21.6464	21.4352	21.6863	21.2163	20.533	21.3204
SPAG9	C-Jun-amino-terminal kinase-interacting protein 4	724	GLDTEGSKQRSASQSSLDKLDQELKEQQKEL	QRS(0.089)AS(0.911)QSS(1)LDK	1;2	22.8471	21.4753	20.9429	21.6516	21.6829	23.7976	23.0591	22.7304	22.9457	22.6988	22.7808	23.838	22.539	21.9098	22.6925	22.7631	23.9924	24.0936	23.8255	23.9291	23.7592	23.9074	22.994	21.5739	21.0193	21.5184	21.6054	22.9383	23.3027	23.0639	22.6133	23.2974	22.7301	23.3788	21.9421	21.2696	21.7969	22.0317	23.4074	23.6567	23.4165	23.0597	23.5663	23.1224
SPAG9	C-Jun-amino-terminal kinase-interacting protein 4	333	SAENEEKSEVQAIIESTPELDMDKDLSGYKG	SEVQAIIES(1)T(1)PELDMDK	1;2	NaN	NaN	NaN	NaN	NaN	NaN	NaN	NaN	NaN	NaN	NaN	NaN	NaN	NaN	NaN	NaN	NaN	NaN	NaN	NaN	NaN	NaN	NaN	NaN	NaN	NaN	NaN	NaN	NaN	NaN	NaN	NaN	NaN	NaN	NaN	NaN	NaN	NaN	NaN	NaN	NaN	NaN	NaN	NaN
SPAG9	C-Jun-amino-terminal kinase-interacting protein 4	1179	TETNKTSGVPGNRPGSVIRVYGDENSDKVTP	TSGVPGNRPGS(1)VIR	1	NaN	NaN	NaN	NaN	NaN	NaN	NaN	NaN	NaN	NaN	NaN	NaN	NaN	NaN	NaN	NaN	NaN	NaN	NaN	NaN	NaN	NaN	16.1798	16.3602	16.292	15.9677	15.8743	16.0164	16.2116	16.0697	16.1162	16.214	16.2669	NaN	NaN	NaN	NaN	NaN	NaN	NaN	NaN	NaN	NaN	NaN
SPAG9	C-Jun-amino-terminal kinase-interacting protein 4	297	EENEGFVKVTDAPNKSEISKHIEVQVAQETR	VTDAPNKS(1)EISK	1	NaN	NaN	NaN	NaN	NaN	NaN	NaN	NaN	NaN	NaN	NaN	19.1196	19.9833	19.444	19.3402	19.2969	19.8172	19.5269	19.3683	19.6708	19.3857	18.9937	NaN	NaN	NaN	NaN	NaN	NaN	NaN	NaN	NaN	NaN	NaN	19.3392	19.702	19.0254	19.1287	18.5783	18.8206	19.4038	18.7898	18.7036	18.9874	18.7329
RORA	Nuclear receptor ROR-alpha	28	ESARKSEPPAPVRRQSYSSTSRDWHA_____	RQS(1)YSSTSR	1	17.7	17.5362	17.3038	17.4527	17.4901	17.9465	18.0046	17.7472	17.9813	17.9225	17.9196	17.1687	17.392	17.1426	16.882	17.2181	17.488	17.6109	17.7582	17.6227	17.6798	17.4627	17.8128	17.4745	17.6251	17.4388	17.4086	17.7597	18.092	17.9367	17.7042	17.8765	17.7177	16.9834	16.9621	17.1998	16.9804	16.8478	17.1915	17.4827	17.4233	17.4359	17.1826	17.2826
RORA	Nuclear receptor ROR-alpha	31	RKSEPPAPVRRQSYSSTSRDWHA________	RQS(0.148)YS(0.055)S(0.793)T(0.004)SR	1	NaN	NaN	NaN	NaN	NaN	NaN	NaN	NaN	NaN	NaN	NaN	18.7212	18.5359	18.5863	18.4702	18.7803	19.2934	19.0797	19.3243	19.2247	19.0305	19.1686	NaN	NaN	NaN	NaN	NaN	NaN	NaN	NaN	NaN	NaN	NaN	NaN	NaN	NaN	NaN	NaN	NaN	NaN	NaN	NaN	NaN	NaN
HECTD1	E3 ubiquitin-protein ligase HECTD1	1388	PDKTSAAAGSSSRKGSSSSVCSVASSSDISL	KGS(0.553)S(0.131)S(0.131)S(0.131)VCS(0.053)VASSSDISLGSTK	1	NaN	NaN	NaN	NaN	NaN	NaN	NaN	NaN	NaN	NaN	NaN	18.7578	17.3291	17.7251	17.5434	17.9769	17.2329	17.3649	17.8052	17.745	17.4961	17.4535	NaN	NaN	NaN	NaN	NaN	NaN	NaN	NaN	NaN	NaN	NaN	NaN	NaN	NaN	NaN	NaN	NaN	NaN	NaN	NaN	NaN	NaN
HECTD1	E3 ubiquitin-protein ligase HECTD1	1389	DKTSAAAGSSSRKGSSSSVCSVASSSDISLG	KGS(0.072)S(0.731)S(0.161)S(0.036)VCSVASSSDISLGSTK	1	18.7245	17.7544	18.1349	17.8279	18.0227	17.3578	17.7452	18.0007	18.0335	17.9096	17.9282	NaN	NaN	NaN	NaN	NaN	NaN	NaN	NaN	NaN	NaN	NaN	NaN	NaN	NaN	NaN	NaN	NaN	NaN	NaN	NaN	NaN	NaN	NaN	NaN	NaN	NaN	NaN	NaN	NaN	NaN	NaN	NaN	NaN
HECTD1	E3 ubiquitin-protein ligase HECTD1	1349	FDLKLAPGYDPDTVASPKPVSSTVSGTTQSW	LAPGYDPDT(0.044)VAS(0.956)PKPVSSTVSGTTQSWSSLVK	1	NaN	NaN	NaN	NaN	NaN	NaN	NaN	NaN	NaN	NaN	NaN	NaN	NaN	NaN	NaN	NaN	NaN	NaN	NaN	NaN	NaN	NaN	16.7878	17.1942	17.0427	16.7247	16.5847	16.8313	16.5172	16.1702	16.4903	16.7477	16.451	18.9393	19.7552	19.226	18.9852	18.6809	19.115	18.6846	18.0032	18.4583	18.6935	17.9609
HECTD1	E3 ubiquitin-protein ligase HECTD1	251	LLSRMAAAGGTVSGPSSACKPGRSTTGAPST	MAAAGGTVS(0.024)GPS(0.867)S(0.109)ACKPGR	1	NaN	NaN	NaN	NaN	NaN	NaN	NaN	NaN	NaN	NaN	NaN	NaN	NaN	NaN	NaN	NaN	NaN	NaN	NaN	NaN	NaN	NaN	17.3504	17.9619	17.3539	17.4418	16.9509	17.4097	17.4307	16.997	17.1741	17.4602	17.1004	18.0417	18.6868	18.1441	18.1289	17.7709	18.2341	18.1632	17.7644	17.9815	18.0914	17.9107
HECTD1	E3 ubiquitin-protein ligase HECTD1	252	LSRMAAAGGTVSGPSSACKPGRSTTGAPSTT	MAAAGGTVSGPS(0.027)S(0.973)ACK	1	16.6655	17.9452	17.2354	17.2955	17.249	17.4384	17.0709	17.0688	17.2796	17.2603	16.9804	NaN	NaN	NaN	NaN	NaN	NaN	NaN	NaN	NaN	NaN	NaN	NaN	NaN	NaN	NaN	NaN	NaN	NaN	NaN	NaN	NaN	NaN	18.0417	18.6868	18.1441	18.1289	17.7709	18.2341	18.1632	17.7644	17.9815	18.0914	17.9107
HECTD1	E3 ubiquitin-protein ligase HECTD1	357	SAGSTGRIPGLRRLDSSGERSHRQLIDCIRS	RLDS(1)SGER	1	21.675	21.7156	21.8123	21.6916	21.8691	20.92	21.0179	21.2662	21.3039	21.2954	21.4804	22.521	22.8147	22.8652	22.7393	22.9518	21.8182	22.2041	22.2855	22.318	22.2306	22.3278	22.0333	22.5539	22.5855	22.4481	22.383	21.4953	21.5745	21.7017	21.6937	21.7595	21.9649	21.3177	21.8599	21.8537	21.7188	21.7283	20.6817	21.1514	21.1519	20.8614	20.939	21.2488
HECTD1	E3 ubiquitin-protein ligase HECTD1	358	AGSTGRIPGLRRLDSSGERSHRQLIDCIRSK	RLDS(0.5)S(0.5)GER	1	NaN	NaN	NaN	NaN	NaN	NaN	NaN	NaN	NaN	NaN	NaN	21.3089	21.7069	21.7379	21.4336	21.7409	20.6571	21.1037	21.1704	21.1275	21.1586	21.0943	20.8421	21.3359	21.4886	21.4214	21.3188	20.3938	20.6124	20.5794	20.6239	20.7054	20.8604	NaN	NaN	NaN	NaN	NaN	NaN	NaN	NaN	NaN	NaN	NaN
HECTD1	E3 ubiquitin-protein ligase HECTD1	1776	RRRTWDDDYVLKRQFSALVPAFDPRPGRTNV	RQFS(1)ALVPAFDPRPGR	1	17.5081	17.5352	17.4604	17.3333	17.7907	17.2774	17.4992	17.8487	17.6608	17.9893	17.5384	19.1583	19.5033	19.5655	19.5093	19.6768	18.9904	19.315	19.5411	19.6251	19.5598	19.18	16.8932	17.1311	17.2651	17.069	16.7256	16.8735	17.0957	16.93	17.2266	17.1594	16.9509	18.7607	19.1121	19.4274	19.068	18.7791	18.6135	18.9789	18.7769	19.027	18.7846	18.7768
HECTD1	E3 ubiquitin-protein ligase HECTD1	1575	ARTNATNNMNLSRSSSDNNTNTLGRNVMSTA	SS(0.002)S(0.997)DNNTNTLGR	1	NaN	NaN	NaN	NaN	NaN	NaN	NaN	NaN	NaN	NaN	NaN	NaN	NaN	NaN	NaN	NaN	NaN	NaN	NaN	NaN	NaN	NaN	NaN	NaN	NaN	NaN	NaN	NaN	NaN	NaN	NaN	NaN	NaN	18.8121	18.7908	18.783	18.4456	18.6997	18.9116	18.893	19.1501	19.1767	18.9197	18.9171
HECTD1	E3 ubiquitin-protein ligase HECTD1	1382	LVKNNCPDKTSAAAGSSSRKGSSSSVCSVAS	TSAAAGS(0.504)S(0.395)S(0.101)RK	1	NaN	NaN	NaN	NaN	NaN	NaN	NaN	NaN	NaN	NaN	NaN	NaN	NaN	NaN	NaN	NaN	NaN	NaN	NaN	NaN	NaN	NaN	15.3605	15.8646	15.7466	15.2739	15.1329	14.9457	14.7134	14.8104	15.2123	14.8909	14.7525	NaN	NaN	NaN	NaN	NaN	NaN	NaN	NaN	NaN	NaN	NaN
HECTD1	E3 ubiquitin-protein ligase HECTD1	631	ARLGVISKVSTLAGPSSDDENEEESKPEKED	VSTLAGPS(0.645)S(0.355)DDENEEESKPEKEDEPQEDAK	1	17.8713	17.8952	17.7469	17.6815	17.7492	16.0437	17.5742	18.0094	17.6718	18.0353	17.5644	20.9345	20.9635	20.9483	20.9255	21.0089	20.3315	20.8321	21.1306	20.8827	21.2062	20.6787	17.8507	18.1018	18.3091	17.9015	17.9689	17.7956	17.3957	17.8602	17.9658	17.1007	17.8841	20.449	20.3968	20.5205	20.3175	20.3173	20.2054	20.1735	20.6192	20.0437	20.7182	20.296
HECTD1	E3 ubiquitin-protein ligase HECTD1	632	RLGVISKVSTLAGPSSDDENEEESKPEKEDE	VSTLAGPS(0.043)S(0.957)DDENEEESKPEKEDEPQEDAK	1	20.8619	20.841	21.0501	20.8947	21.0385	20.5502	20.8509	20.9333	20.9995	20.9195	20.8592	19.8964	19.9577	19.8305	20.0297	20.0285	19.7333	19.8644	19.9021	19.9593	19.9613	19.6863	18.8217	18.5452	18.6857	18.6505	18.5383	18.5684	17.9202	18.7591	18.4453	18.1464	18.4958	NaN	NaN	NaN	NaN	NaN	NaN	NaN	NaN	NaN	NaN	NaN
PSMC6	26S protease regulatory subunit 10B	258	IIFMDEIDAIGGRRFSEGTSADREIQRTLME	RFS(0.981)EGT(0.017)S(0.002)ADREIQR	1	16.6922	16.7668	16.8163	16.8566	16.737	16.6967	16.7071	16.7829	17.103	17.0145	16.8292	NaN	NaN	NaN	NaN	NaN	NaN	NaN	NaN	NaN	NaN	NaN	NaN	NaN	NaN	NaN	NaN	NaN	NaN	NaN	NaN	NaN	NaN	NaN	NaN	NaN	NaN	NaN	NaN	NaN	NaN	NaN	NaN	NaN
NCOR1	Nuclear receptor corepressor 1	1188	SAPLEGLICRALPRGSPHSDLKERTVLSGSI	ALPRGS(1)PHSDLK	1	19.0446	19.4662	19.255	19.279	19.0548	19.551	19.6389	19.3061	19.6134	19.4432	19.3339	20.7157	21.1856	21.015	21.1409	21.0651	21.242	21.1529	21.0378	21.2848	20.9227	21.1149	19.0353	19.0576	18.8404	18.9862	18.7724	19.3028	19.1153	19.1697	18.9669	19.1993	19.0059	20.6572	21.1184	20.9845	21.1143	20.8167	21.0226	20.9858	21.0405	20.8025	20.9018	20.8447
NCOR1	Nuclear receptor corepressor 1	1379	SVLRSTLHEAPKAQLSPGIYDDTSARRTPVS	AQLS(1)PGIYDDTSAR	1;2	19.1058	19.1908	19.2534	19.2225	19.2152	19.7785	19.4083	19.2086	19.3666	19.1556	19.263	19.9898	20.2328	20.1253	19.9933	19.9511	20.0281	19.9253	19.9135	20.0309	19.9565	19.765	19.203	19.2941	19.1801	19.2033	19.2655	19.6236	19.2392	19.2152	19.1245	19.4017	19.0901	20.0794	20.5316	19.9211	20.1812	20.23	20.6611	20.1345	20.6098	20.0343	20.0939	20.1938
NCOR1	Nuclear receptor corepressor 1	1438	KSTLTPTQRESIPAKSPVPGVDPVVSHSPFD	S(1)PVPGVDPVVSHSPFDPHHR	1;2	16.5275	17.0205	16.6243	16.9201	16.4826	18.0368	16.9883	16.5999	16.8101	16.9286	16.5742	NaN	NaN	NaN	NaN	NaN	NaN	NaN	NaN	NaN	NaN	NaN	17.1842	17.4527	17.2581	16.9848	17.4182	17.8316	17.0643	17.3928	17.1208	16.6605	17.1827	NaN	NaN	NaN	NaN	NaN	NaN	NaN	NaN	NaN	NaN	NaN
NCOR1	Nuclear receptor corepressor 1	2088	SQRGAEPAEQRNDARSPGSISYLPSFFTKLE	GAEPAEQRNDARS(1)PGSISYLPSFFTK	1	20.4204	20.0772	20.0936	20.4658	20.3718	20.7924	20.8087	20.7919	21.0013	20.7354	20.9456	22.0431	21.4816	21.9074	21.9815	22.1521	22.5424	22.634	22.5813	22.6242	22.1791	22.57	21.082	20.6284	20.8143	20.9225	20.8745	21.2932	21.4075	21.4278	21.1534	21.4266	21.2788	22.5146	21.7674	22.1984	22.2749	22.3098	22.7026	22.7645	22.8111	22.5025	22.779	22.8078
NCOR1	Nuclear receptor corepressor 1	1540	QQMQVNLRPDVARGLSPREQPLGLPYPATRG	GLS(1)PREQPLGLPYPATR	1	16.4783	16.7788	16.6109	16.6506	16.5026	17.057	16.8073	16.586	16.9187	16.9586	16.6781	NaN	NaN	NaN	NaN	NaN	NaN	NaN	NaN	NaN	NaN	NaN	NaN	NaN	NaN	NaN	NaN	NaN	NaN	NaN	NaN	NaN	NaN	18.7106	18.902	18.7111	18.4137	18.1645	18.9582	18.9293	18.4096	18.4628	18.9479	18.3315
NCOR1	Nuclear receptor corepressor 1	49	AKKDPAFGGKHEAPSSPISGQPCGDDQNASP;HQQDPAFGGKHEAPSSPISGQPCGDDQNASP	HEAPS(0.003)S(0.997)PISGQPCGDDQNASPSK	1;2	NaN	NaN	NaN	NaN	NaN	NaN	NaN	NaN	NaN	NaN	NaN	19.5564	19.8446	19.811	19.9101	19.998	19.2402	19.9448	20.0258	19.9591	19.9123	20.1002	15.8257	15.8317	15.7188	16.1176	15.8577	16.1695	15.8839	16.3007	15.751	15.6407	16.2318	18.5589	18.4052	18.4084	18.6911	18.4693	18.5197	18.5806	19.0645	18.2944	18.0634	18.7697
NCOR1	Nuclear receptor corepressor 1	63	SSPISGQPCGDDQNASPSKLSKEELIQSMDR	HEAPS(0.042)S(0.958)PISGQPCGDDQNAS(0.999)PS(0.001)K	1;2	17.6065	17.6823	17.9781	17.8313	17.9977	17.2724	17.9515	17.7411	18.0439	17.9455	17.9243	17.3406	17.4829	17.6547	17.4306	17.8216	17.0314	17.5685	17.5518	17.444	17.6902	17.4345	18.5064	18.0349	17.9899	18.098	18.0787	18.2973	18.1976	18.4743	17.9749	18.0784	18.2294	19.5508	19.1067	19.3949	19.2464	19.526	19.7832	19.5643	19.5975	19.4375	19.5767	19.6663
NCOR1	Nuclear receptor corepressor 1	2106	SISYLPSFFTKLENTSPMVKSKKQEIFRKLN	LENT(0.068)S(0.932)PMVK	1	NaN	NaN	NaN	NaN	NaN	NaN	NaN	NaN	NaN	NaN	NaN	NaN	NaN	NaN	NaN	NaN	NaN	NaN	NaN	NaN	NaN	NaN	NaN	NaN	NaN	NaN	NaN	NaN	NaN	NaN	NaN	NaN	NaN	21.4727	21.5484	21.1461	21.2429	20.8957	21.5783	21.4585	21.1206	21.1758	21.2687	20.973
NCOR1	Nuclear receptor corepressor 1	1102	EALVKGSISRMPIEDSSPEKGREEAASKGHV	MPIEDS(0.64)S(0.36)PEK	1	19.8141	19.7316	19.3034	19.3818	19.6575	19.6043	19.5208	19.4752	19.8129	19.6661	19.4225	20.2186	20.0109	20.3868	20.4493	20.3753	20.5617	20.6169	20.4466	20.46	20.7268	20.3288	21.3441	21.3695	21.4734	21.3949	21.2592	21.4424	21.4309	21.4415	21.237	21.3928	21.4651	20.6981	20.6459	20.6463	20.6318	20.4102	20.7552	20.8031	20.899	20.4344	20.7997	20.5325
NCOR1	Nuclear receptor corepressor 1	1103	ALVKGSISRMPIEDSSPEKGREEAASKGHVI	MPIEDS(0.017)S(0.983)PEK	1	20.1037	20.0987	19.7437	19.8348	20.0113	19.9707	19.9321	19.8806	20.1786	20.0366	19.8573	22.1997	22.2431	22.4417	22.4238	22.4173	22.4558	22.3917	22.5112	22.5126	22.5466	22.4679	20.6061	20.6142	20.7223	20.6735	20.5209	20.7355	20.7041	20.6645	20.5751	20.6992	20.7139	21.9446	21.8942	22.0075	21.9384	21.7993	21.9885	22.0245	22.2578	21.6336	22.1063	21.8693
NCOR1	Nuclear receptor corepressor 1	824	DSKPSLLNPTGSILVSSPLKPNPLDLPQLQH	PSLLNPTGSILVS(0.5)S(0.5)PLKPNPLDLPQLQHR	1	NaN	NaN	NaN	NaN	NaN	NaN	NaN	NaN	NaN	NaN	NaN	NaN	NaN	NaN	NaN	NaN	NaN	NaN	NaN	NaN	NaN	NaN	NaN	NaN	NaN	NaN	NaN	NaN	NaN	NaN	NaN	NaN	NaN	17.8452	18.5994	18.4374	18.2858	18.0167	18.3997	18.0927	18.1753	18.1321	18.0349	18.331
NCOR1	Nuclear receptor corepressor 1	825	SKPSLLNPTGSILVSSPLKPNPLDLPQLQHR	PSLLNPTGSILVS(0.5)S(0.5)PLKPNPLDLPQLQHR	1	NaN	NaN	NaN	NaN	NaN	NaN	NaN	NaN	NaN	NaN	NaN	NaN	NaN	NaN	NaN	NaN	NaN	NaN	NaN	NaN	NaN	NaN	NaN	NaN	NaN	NaN	NaN	NaN	NaN	NaN	NaN	NaN	NaN	17.8452	18.5994	18.4374	18.2858	18.0167	18.3997	18.0927	18.1753	18.1321	18.0349	18.331
NCOR1	Nuclear receptor corepressor 1	1018	SAKSATLPYIKQEEFSPRSQNSQPEGLLVRA	QEEFS(1)PR	1	17.2483	17.303	17.2225	17.2861	17.4657	16.5769	17.36	17.2018	17.4864	17.4481	17.3599	NaN	NaN	NaN	NaN	NaN	NaN	NaN	NaN	NaN	NaN	NaN	NaN	NaN	NaN	NaN	NaN	NaN	NaN	NaN	NaN	NaN	NaN	NaN	NaN	NaN	NaN	NaN	NaN	NaN	NaN	NaN	NaN	NaN
NCOR1	Nuclear receptor corepressor 1	1170	ESVEGNIKQGMSMRESPVSAPLEGLICRALP	QGMSMRES(1)PVSAPLEGLICR	1	19.2298	19.4648	19.237	19.2859	19.4637	19.5667	19.4193	19.0559	19.4604	19.1217	19.3683	18.7	19.5992	19.2769	19.294	19.1878	19.2874	19.2538	19.0494	19.2135	19.0999	18.8286	18.2749	18.2132	18.234	18.1997	18.2122	18.4059	18.4664	18.2889	18.1175	18.3668	18.2198	18.4544	18.5488	18.5249	18.4726	18.3627	18.7132	18.5176	18.7206	18.4775	18.3453	18.4082
NCOR1	Nuclear receptor corepressor 1	1496	RALDPAAAYLFQRQLSPTPGYPSQYQLYAME	QLS(0.832)PT(0.168)PGYPSQYQLYAMENTR	1	NaN	NaN	NaN	NaN	NaN	NaN	NaN	NaN	NaN	NaN	NaN	NaN	NaN	NaN	NaN	NaN	NaN	NaN	NaN	NaN	NaN	NaN	NaN	NaN	NaN	NaN	NaN	NaN	NaN	NaN	NaN	NaN	NaN	NaN	NaN	NaN	NaN	NaN	NaN	NaN	NaN	NaN	NaN	NaN
NCOR1	Nuclear receptor corepressor 1	115	LEEEAAKPPEPEKPVSPPPVEQKHRSIVQII	QQQLEEEAAKPPEPEKPVS(1)PPPVEQK	1	20.4481	20.868	20.7582	20.7062	20.7755	20.8468	20.7943	20.7102	20.8681	20.6338	20.7403	20.3324	20.4712	20.6985	20.518	20.8572	20.8972	20.9185	20.5238	20.6885	20.5976	20.7909	18.9245	19.0454	18.966	19.0141	19.0622	19.1885	19.054	19.0618	18.9591	19.2579	19.1136	17.4851	17.8356	17.6949	17.4233	17.6255	18.0246	17.5277	17.5537	17.5952	17.4412	17.7773
NCOR1	Nuclear receptor corepressor 1	1229	SFEDGLKYPKQIKRESPPIRAFEGAITKGKP	RES(1)PPIRAFEGAITK	1	18.9785	19.2707	19.2185	19.3292	19.3576	19.2879	19.3627	19.2491	19.5731	19.3732	19.3826	18.3763	18.5013	18.4274	18.5678	18.6847	18.5036	18.7224	18.6943	18.9436	18.6727	18.6268	19.4352	19.4947	19.511	19.5062	19.3771	19.5872	19.6081	19.7403	19.5146	19.7109	19.7723	18.2967	18.5411	18.7342	18.613	18.3797	18.7047	18.6038	18.5977	18.307	18.6812	18.7878
NCOR1	Nuclear receptor corepressor 1	2055	SPERSHVSSEPYEPISPPQVPVVHEKQDSLL	SHVSSEPY(0.033)EPIS(0.967)PPQVPVVHEK	1	NaN	NaN	NaN	NaN	NaN	NaN	NaN	NaN	NaN	NaN	NaN	NaN	NaN	NaN	NaN	NaN	NaN	NaN	NaN	NaN	NaN	NaN	NaN	NaN	NaN	NaN	NaN	NaN	NaN	NaN	NaN	NaN	NaN	NaN	NaN	NaN	NaN	NaN	NaN	NaN	NaN	NaN	NaN	NaN
NCOR1	Nuclear receptor corepressor 1	906	DLECRSSTSPCGTSKSPNREWEVLQPAPHQV	S(1)PNREWEVLQPAPHQVITNLPEGVR	1;2	18.3944	18.4957	18.442	18.6264	18.4697	19.3882	18.5512	18.6375	18.7297	18.5918	18.9575	17.1576	17.2155	17.2897	17.3946	17.3835	16.8792	17.4053	17.4187	17.6191	17.1676	17.6384	18.0627	17.7591	18.114	18.151	17.9493	18.1988	18.2459	18.3918	17.9979	18.0075	18.2233	17.8585	17.6041	18.2644	17.849	17.7002	18.1334	18.2754	18.214	17.8096	17.1299	18.0543
NCOR1	Nuclear receptor corepressor 1	1662	EQPGRPGSHGYVRSPSPSVRTQETMLQQRPS	SPS(0.999)PS(0.001)VR	1	17.4373	17.3555	17.3602	17.4782	17.4333	17.9017	17.6782	17.5881	17.7453	17.5252	17.7257	20.4826	20.7505	20.776	20.811	20.8565	20.7068	20.7141	20.7995	20.7193	20.6415	20.7474	20.0359	19.9618	20.2074	19.9536	20.1085	20.3207	20.3052	20.2365	19.8754	20.14	20.1813	20.9582	21.0056	21.1948	21.0429	20.9656	21.0122	21.3027	21.0906	20.7731	21.1005	21.0493
NCOR1	Nuclear receptor corepressor 1	1664	PGRPGSHGYVRSPSPSVRTQETMLQQRPSVF	S(0.064)PS(0.083)PS(0.853)VR	1	NaN	NaN	NaN	NaN	NaN	NaN	NaN	NaN	NaN	NaN	NaN	NaN	NaN	NaN	NaN	NaN	NaN	NaN	NaN	NaN	NaN	NaN	NaN	NaN	NaN	NaN	NaN	NaN	NaN	NaN	NaN	NaN	NaN	NaN	NaN	NaN	NaN	NaN	NaN	NaN	NaN	NaN	NaN	NaN
NCOR1	Nuclear receptor corepressor 1	899	RQRQEQIDLECRSSTSPCGTSKSPNREWEVL	SST(0.001)S(0.999)PCGTSK	1;2	19.6743	19.8853	19.8757	19.8153	19.7656	18.9162	20.0378	19.9068	19.9411	19.7706	19.9606	19.9744	20.275	20.3179	20.313	20.17	19.1576	20.3762	20.2455	20.3829	20.0815	20.3359	21.4268	21.4602	21.5363	21.3708	21.4059	21.5936	21.3084	21.5806	21.2462	20.8235	21.4096	22.9028	22.9377	22.9965	22.9725	22.9289	23.1888	22.8552	23.0585	22.7709	22.337	22.9106
WDR20	WD repeat-containing protein 20	384	LHFGRDRANSTQSRLSKRNSTDSRPVSVTYR	ANS(0.983)T(0.017)QS(0.001)RLS(1)K	1;2	16.2528	16.5977	16.4784	16.5494	16.4313	16.0384	16.7008	16.3699	16.2224	16.2352	16.7357	NaN	NaN	NaN	NaN	NaN	NaN	NaN	NaN	NaN	NaN	NaN	19.1672	19.6963	19.7247	19.7617	19.5572	19.4649	19.5823	19.7642	19.4535	19.6362	19.653	20.4961	20.7915	20.8477	20.7589	20.6254	20.6862	20.7552	20.7605	20.4861	20.9211	20.7182
WDR20	WD repeat-containing protein 20	388	RDRANSTQSRLSKRNSTDSRPVSVTYRFGSV	RNS(0.983)T(0.017)DSRPVSVTYR	1;2	16.7886	16.0726	16.1797	16.269	16.4337	16.6542	16.9117	17.1313	17.0767	17.2539	17.2058	18.5506	17.7724	18.061	18.0185	17.9448	18.2798	18.2014	18.387	18.2004	18.4225	18.0172	17.4531	17.3286	17.6012	17.554	17.3888	17.6512	17.5958	17.9242	17.5407	17.9887	17.6595	19.3009	19.0591	18.6794	18.7395	18.8715	19.7325	19.5806	19.4408	19.4537	19.8135	19.1635
WDR20	WD repeat-containing protein 20	463	SVTTPGNSVPPPLPRSNSLPHSAVSNAGSKS	S(0.714)NS(0.286)LPHSAVSNAGSK	1	17.2326	17.8285	17.6602	17.3988	17.5532	17.5339	17.3697	17.192	17.37	17.2597	17.2539	18.2643	18.4793	18.6121	18.2928	18.4498	18.6636	18.2193	18.1821	18.2286	18.136	17.9776	17.7108	18.0816	17.4281	17.8318	17.7379	17.8015	17.1617	17.6765	16.8021	17.5149	17.1438	NaN	NaN	NaN	NaN	NaN	NaN	NaN	NaN	NaN	NaN	NaN
WDR20	WD repeat-containing protein 20	465	TTPGNSVPPPLPRSNSLPHSAVSNAGSKSSV	S(0.024)NS(0.965)LPHS(0.01)AVSNAGSK	1	15.8916	16.29	16.3186	15.9169	16.2229	15.7685	15.6813	15.9759	15.858	15.9298	15.9634	20.4679	20.7505	20.6895	20.2605	20.5139	20.4837	20.2241	20.3286	20.2716	20.1167	20.1578	18.7507	19.2159	18.627	18.732	18.931	18.953	18.315	18.7477	18.1812	18.3914	18.4042	20.4386	20.7776	20.1614	20.4373	20.4892	20.4961	20.0053	20.466	19.7772	20.0507	19.9452
WDR20	WD repeat-containing protein 20	469	NSVPPPLPRSNSLPHSAVSNAGSKSSVMDGA	S(0.001)NS(0.094)LPHS(0.905)AVSNAGSK	1	18.4587	18.9274	18.8097	18.5546	18.786	18.5479	18.2947	18.3212	18.4332	18.4388	18.2216	NaN	NaN	NaN	NaN	NaN	NaN	NaN	NaN	NaN	NaN	NaN	NaN	NaN	NaN	NaN	NaN	NaN	NaN	NaN	NaN	NaN	NaN	NaN	NaN	NaN	NaN	NaN	NaN	NaN	NaN	NaN	NaN	NaN
NARF	Nuclear prelamin A recognition factor	29	KTKTDDQENVSADAPSPAQENGEKGEFHKLA	TKTDDQENVSADAPS(1)PAQENGEK	1	16.2135	16.605	16.4603	16.644	16.681	17.0452	16.4653	16.3523	16.8754	16.6653	16.4926	18.0522	18.2926	18.4158	18.5044	18.4955	19.0633	18.588	18.0655	18.6408	18.5243	18.4515	18.7427	18.8795	18.6743	18.5886	18.5542	18.778	19.1317	18.7067	18.644	19.2272	18.6831	17.1318	17.5653	17.3586	17.2576	17.181	17.4186	17.7329	17.4088	17.0341	17.7947	17.1506
DOCK1	Dedicator of cytokinesis protein 1	1702	GFALEPLLPKKMHSRSQDKLDKDDLEKEKKD	MHS(0.002)RS(0.998)QDK	1	NaN	NaN	NaN	NaN	NaN	NaN	NaN	NaN	NaN	NaN	NaN	NaN	NaN	NaN	NaN	NaN	NaN	NaN	NaN	NaN	NaN	NaN	19.6576	18.672	18.6277	18.6889	18.5746	19.8754	19.3047	19.6417	19.5247	18.5466	19.603	NaN	NaN	NaN	NaN	NaN	NaN	NaN	NaN	NaN	NaN	NaN
CDKL5	Cyclin-dependent kinase-like 5	407	STSKDLTNNNIPHLLSPKEAKSKTEFDFNID	DLTNNNIPHLLS(1)PK	1	NaN	NaN	NaN	NaN	NaN	NaN	NaN	NaN	NaN	NaN	NaN	NaN	NaN	NaN	NaN	NaN	NaN	NaN	NaN	NaN	NaN	NaN	16.4948	16.9192	16.3739	16.2379	16.5349	16.747	16.3334	16.122	16.1882	16.5639	16.2306	18.1348	18.4809	18.2637	17.968	18.1641	18.1822	17.9161	17.9991	17.82	17.8464	17.7169
CDKL5	Cyclin-dependent kinase-like 5	306	CLNHPTFQTQRLLDRSPSRSAKRKPYHVESS	LLDRS(0.998)PS(0.002)R	1	NaN	NaN	NaN	NaN	NaN	NaN	NaN	NaN	NaN	NaN	NaN	18.3179	18.1762	18.3046	18.4082	18.3863	18.1536	18.4436	18.377	18.5091	18.4157	18.4589	NaN	NaN	NaN	NaN	NaN	NaN	NaN	NaN	NaN	NaN	NaN	18.5908	18.4766	18.594	18.3646	18.431	18.6233	18.3093	18.569	18.4878	18.1918	18.2869
AAK1	Uncharacterized protein FLJ45252	249	PGKLGGAVPFAPPEVSPEQAKTVQGGRKNQF	LGGAVPFAPPEVS(1)PEQAK	1	17.45	18.0211	17.7813	18.0039	18.091	17.5463	17.8763	17.5889	17.8902	17.2928	17.6261	21.7118	21.8469	21.6464	21.9578	21.8025	21.7591	22.0661	21.6905	22.1161	21.7037	21.9233	20.748	20.8142	20.662	20.7511	20.53	21.0586	20.7563	20.9084	20.6578	20.7819	20.8289	22.4251	22.5254	22.4146	22.4712	22.4593	22.568	22.5723	22.5574	22.3491	22.6426	22.4154
AAK1		79	FAKLGEGKHPEKLGGSAESLIPGFQSTQGDA	LGGS(0.912)AES(0.063)LIPGFQS(0.013)T(0.013)QGDAFATTSFSAGTDLQR	1	16.3237	16.2606	16.3389	16.7927	16.797	17.0583	16.6092	16.8039	16.7826	16.6237	16.6306	NaN	NaN	NaN	NaN	NaN	NaN	NaN	NaN	NaN	NaN	NaN	15.103	15.0961	14.7917	15.366	14.9184	14.8251	15.3381	15.0807	15.0893	15.5095	15.1502	18.5168	18.2396	18.316	18.3241	18.363	18.5601	18.6983	18.7388	18.4139	18.7532	18.6433
AAK1		82	LGEGKHPEKLGGSAESLIPGFQSTQGDAFAT	LGGS(0.473)AES(0.527)LIPGFQSTQGDAFATTSFSAGTDLQR	1	NaN	NaN	NaN	NaN	NaN	NaN	NaN	NaN	NaN	NaN	NaN	17.1215	16.7149	16.8113	17.0343	17.1103	17.1115	17.2449	17.389	17.4089	17.1996	17.3806	NaN	NaN	NaN	NaN	NaN	NaN	NaN	NaN	NaN	NaN	NaN	NaN	NaN	NaN	NaN	NaN	NaN	NaN	NaN	NaN	NaN	NaN
AAK1	AP2-associated protein kinase 1	678	ASLNKSKSATTTPSGSPRTSQQNVYNPSEGS	SATTTPSGS(1)PR	1;2;3	19.9798	21.0744	21.0239	20.8527	20.5737	20.195	20.3905	20.1816	20.517	20.0845	20.4827	20.03	21.1695	21.119	21.1323	20.8051	20.5335	20.6533	20.3903	20.7439	20.2168	20.5861	20.2376	20.7558	20.6451	20.5676	20.2434	20.1859	19.964	20.2507	20.0315	19.8639	20.1202	20.7794	21.4337	21.4247	21.3542	21.1045	20.85	20.5135	21.0085	20.8824	20.5823	20.5907
AAK1	Uncharacterized protein FLJ45252	450	KPFRPQSLSKYSRHYSPEDEPSPEAQPIAAY	HYS(0.999)PEDEPS(0.001)PEAQPIAAYK	1	19.535	18.9797	18.837	19.1954	19.0365	19.8154	19.7229	19.5377	19.7709	19.6871	19.464	NaN	NaN	NaN	NaN	NaN	NaN	NaN	NaN	NaN	NaN	NaN	18.2045	17.496	17.255	17.546	17.613	18.1967	18.2242	18.0429	18.0625	18.1391	17.8463	17.9455	17.6485	17.247	17.5444	17.6576	17.8031	17.9001	18.0431	17.2743	17.7966	17.742
AAK1	AP2-associated protein kinase 1	731	FAKLGEGKHPEKLGGSAESLIPGFQSTQGDA	LGGS(0.985)AES(0.015)LIPGFQSTQGDAFATTSFSAGTAEK	1	NaN	NaN	NaN	NaN	NaN	NaN	NaN	NaN	NaN	NaN	NaN	NaN	NaN	NaN	NaN	NaN	NaN	NaN	NaN	NaN	NaN	NaN	16.697	16.4961	16.5836	16.6896	16.5646	17.0067	16.9829	16.9171	16.5832	16.7551	16.8044	18.6697	18.4465	18.464	18.4218	18.3809	18.8341	18.8143	18.9825	18.6162	18.8454	18.8514
FAM21C;FAM21D	WASH complex subunit FAM21C;Putative WASH complex subunit FAM21	1114	AAAPWEGGPVPGVDTSPFAKSLGHSRGEADL	AASGEDSTEEALAAAAAPWEGGPVPGVDT(0.178)S(0.822)PFAK	1	15.2938	15.7213	15.6978	15.7548	15.5968	15.7048	15.5192	15.4361	15.6584	15.4054	15.3543	19.2332	19.9591	19.6404	19.775	19.6767	19.4566	19.2145	19.0738	19.4186	19.2246	19.0834	15.876	15.7625	16.4163	16.195	15.8926	15.5959	16.0183	15.7388	15.0558	16.1664	15.9549	18.7466	18.9867	18.8532	18.8647	18.9402	18.6575	18.4926	18.397	18.2853	18.6954	18.4791
FAM21C;FAM21A	WASH complex subunit FAM21C;WASH complex subunit FAM21A	70	VLDSAFEQLDIKAGNSDSEEDDANGRVELIL	AGNS(1)DS(1)EEDDANGRVELILEPK	1;2	NaN	NaN	NaN	NaN	NaN	NaN	NaN	NaN	NaN	NaN	NaN	NaN	NaN	NaN	NaN	NaN	NaN	NaN	NaN	NaN	NaN	NaN	NaN	NaN	NaN	NaN	NaN	NaN	NaN	NaN	NaN	NaN	NaN	19.0602	19.7321	19.9902	19.693	19.4213	19.0161	19.1449	19.3596	18.9612	19.6184	19.0106
FAM21C;FAM21A	WASH complex subunit FAM21C;WASH complex subunit FAM21A	72	DSAFEQLDIKAGNSDSEEDDANGRVELILEP	AGNS(1)DS(1)EEDDANGRVELILEPK	1;2	NaN	NaN	NaN	NaN	NaN	NaN	NaN	NaN	NaN	NaN	NaN	NaN	NaN	NaN	NaN	NaN	NaN	NaN	NaN	NaN	NaN	NaN	17.6114	18.3784	18.4511	18.0831	17.7534	17.7255	17.7246	17.95	17.6598	18.0766	17.9027	NaN	NaN	NaN	NaN	NaN	NaN	NaN	NaN	NaN	NaN	NaN
FAM21C;FAM21D;FAM21A	WASH complex subunit FAM21C;Putative WASH complex subunit FAM21;WASH complex subunit FAM21A	1081	IAENPANPPVGGKAKSPMFPALGEASSDDDL	AKS(1)PMFPALGEAS(0.538)S(0.462)DDDLFQSAKPK	1;2	NaN	NaN	NaN	NaN	NaN	NaN	NaN	NaN	NaN	NaN	NaN	17.3693	19.0212	18.2149	18.9671	18.0499	15.4229	17.4662	17.9156	17.7989	17.891	17.7932	NaN	NaN	NaN	NaN	NaN	NaN	NaN	NaN	NaN	NaN	NaN	16.6104	17.2937	16.6918	17.0306	16.7567	16.8111	16.7895	16.6203	16.871	16.6741	16.5826
FAM21C;FAM21D;FAM21A	WASH complex subunit FAM21C;Putative WASH complex subunit FAM21;WASH complex subunit FAM21A	1091	GGKAKSPMFPALGEASSDDDLFQSAKPKPAK	S(0.018)PMFPALGEAS(0.987)S(0.987)DDDLFQS(0.007)AKPK	1;2	17.4818	18.9739	18.3297	18.5396	18.0842	17.1531	17.7752	17.6927	17.8829	17.7174	17.847	NaN	NaN	NaN	NaN	NaN	NaN	NaN	NaN	NaN	NaN	NaN	18.28	18.1045	17.8246	18.0063	17.6244	18.4612	18.6608	18.4033	18.2746	18.7784	18.4739	20.061	18.3437	18.0384	18.7209	18.132	20.0858	19.6211	20.0969	19.8748	18.9604	20.1127
FAM21C;FAM21D;FAM21A	WASH complex subunit FAM21C;Putative WASH complex subunit FAM21;WASH complex subunit FAM21A	1092	GKAKSPMFPALGEASSDDDLFQSAKPKPAKK	S(0.018)PMFPALGEAS(0.987)S(0.987)DDDLFQS(0.007)AKPK	1;2	19.3588	18.1363	17.7884	18.3741	18.5609	20.16	19.6016	19.5224	19.9233	19.5681	19.6364	20.6039	19.2006	19.1128	19.5019	19.912	21.1504	20.8949	20.8217	21.1294	20.8424	20.8607	19.8608	18.4205	18.1139	18.6582	18.816	19.9366	19.5454	20.135	19.894	19.2351	19.9413	19.9092	18.641	17.9425	18.88	18.851	20.0925	20.3379	20.2049	20.055	20.4981	20.2078
FAM21C;FAM21A	WASH complex subunit FAM21C;WASH complex subunit FAM21A	531	KASELSKKKASALLFSSDEEDQWNIPASQTH	ASALLFS(1)S(1)DEEDQWNIPASQTHLASDSR	1;2	NaN	NaN	NaN	NaN	NaN	NaN	NaN	NaN	NaN	NaN	NaN	NaN	NaN	NaN	NaN	NaN	NaN	NaN	NaN	NaN	NaN	NaN	NaN	NaN	NaN	NaN	NaN	NaN	NaN	NaN	NaN	NaN	NaN	19.4894	19.556	18.5516	19.1179	19.2718	19.6736	19.2881	19.2966	19.1368	18.9369	19.0488
FAM21C;FAM21A	WASH complex subunit FAM21C;WASH complex subunit FAM21A	532	ASELSKKKASALLFSSDEEDQWNIPASQTHL	ASALLFS(1)S(1)DEEDQWNIPASQTHLASDSR	1;2	18.1607	18.1935	18.2603	17.8602	18.3985	19.0633	18.5165	18.5629	18.561	18.4265	18.3018	NaN	NaN	NaN	NaN	NaN	NaN	NaN	NaN	NaN	NaN	NaN	18.2976	18.4168	18.0767	17.7736	18.352	18.559	18.6365	18.5487	18.3339	18.574	18.1363	NaN	NaN	NaN	NaN	NaN	NaN	NaN	NaN	NaN	NaN	NaN
FAM21C;FAM21A	WASH complex subunit FAM21C;WASH complex subunit FAM21A	410	FGDEEGDLFKEKAVASPEATVSQTDENKARA	AVAS(1)PEATVSQTDENK	1	18.23	18.7208	18.3925	18.4311	18.2411	18.3261	18.4048	17.8668	18.3362	18.0286	18.0314	20.3594	20.7964	20.7691	20.6717	20.6196	20.8748	20.4618	20.2565	20.4989	20.2645	20.1513	18.1089	18.134	17.8961	17.9391	17.8042	18.0788	17.9559	17.6172	17.5876	17.6315	17.6403	18.6249	18.8462	18.5619	18.5798	18.3691	18.6028	18.5121	18.2941	18.3203	18.0911	18.0346
FAM21C;FAM21A	WASH complex subunit FAM21C;WASH complex subunit FAM21A	245	KPRKTLKEKKERRTPSDDEEDNLFAPPKLTD	ERRT(1)PS(1)DDEEDNLFAPPK	1;2	19.5055	19.716	19.8025	19.9104	19.7005	20.09	19.6989	19.6166	19.8068	19.7787	19.7085	20.3276	20.6158	20.8548	20.9153	20.81	21.5168	20.7326	20.4084	20.8448	20.5405	20.6987	18.1502	18.1836	18.3446	18.3307	18.1384	18.0683	18.2467	18.3664	17.911	18.3688	18.0498	20.9668	21.263	21.4265	21.374	21.3167	21.0294	21.2226	21.097	20.939	21.0983	20.8884
FAM21C;FAM21A	WASH complex subunit FAM21C;WASH complex subunit FAM21A	640	TKKKETVSEAPPLLFSDEEEKEAQLGVKSVD	KET(1)VS(1)EAPPLLFS(1)DEEEK	1;3	20.0351	19.7199	19.3137	19.8202	19.7703	20.5849	20.2348	20.1823	20.4046	20.1279	20.364	22.8657	22.4555	22.2856	22.5221	22.6339	23.2723	23.0603	22.9498	23.1812	22.8626	23.0354	21.0079	20.5107	20.2365	20.4827	20.5991	20.9757	20.9354	20.9995	20.8378	20.7222	20.8853	22.9979	22.3588	22.2766	22.5302	22.5665	23.0553	22.9018	23.1488	22.9293	22.6938	22.9077
FAM21C	WASH complex subunit FAM21C	539	NLKPSSETKTQKGLFSDEEDSEDLFSSQSAS	GLFS(1)DEEDSEDLFSSQSASNLK	1	17.2128	17.0989	17.1686	17.2221	17.1632	17.8274	17.6586	17.4801	17.7475	17.7462	17.7249	19.4137	19.0873	18.762	19.0583	19.1588	19.5418	19.6128	19.464	19.9511	19.6448	19.6726	19.9748	19.6206	19.6354	19.8825	19.7524	20.1397	20.0924	20.3279	20.1131	20.0757	20.2357	20.2316	19.8418	19.9398	20.2285	20.106	20.5345	20.4341	20.5977	20.1814	20.4791	20.5415
FAM21C	WASH complex subunit FAM21C	544	SETKTQKGLFSDEEDSEDLFSSQSASNLKGA	GLFSDEEDS(0.999)EDLFSSQSASNLK	1	18.3207	17.9459	18.0364	18.3439	18.2171	18.7187	18.754	18.6865	19.0301	18.5901	18.8157	NaN	NaN	NaN	NaN	NaN	NaN	NaN	NaN	NaN	NaN	NaN	17.9762	17.4411	17.1909	17.5205	17.476	17.8811	17.6535	18.0896	17.7477	17.9109	17.9015	NaN	NaN	NaN	NaN	NaN	NaN	NaN	NaN	NaN	NaN	NaN
FAM21C;FAM21D;FAM21A	WASH complex subunit FAM21C;Putative WASH complex subunit FAM21;WASH complex subunit FAM21A	987	SVPRGPIAQWADGAISPNGHRPQLRAASGED	GPIAQWADGAIS(1)PNGHRPQLR	1	16.1216	16.333	16.0324	16.3213	16.3289	16.0941	16.0182	15.9635	15.8962	15.9874	15.9246	18.0263	18.4265	18.3817	18.3587	18.2586	18.4009	18.0793	18.0517	18.2661	18.0934	18.0758	16.8968	16.9152	16.9907	16.8975	16.9004	17.1817	17.0932	17.2329	17.0336	17.7543	16.8152	18.2053	18.4753	18.4095	18.3581	18.2544	18.3094	18.4598	18.2971	18.2453	18.8573	18.0758
FAM21C;FAM21A	WASH complex subunit FAM21C;WASH complex subunit FAM21A	698	RSAQETVKHSDLFSSSSPWDKGTKPRTKTVL	HSDLFS(0.011)S(0.023)S(0.889)S(0.077)PWDK	1	17.6239	19.0555	18.3075	18.1199	17.9623	18.3486	17.9122	17.4632	18.1018	17.7963	17.3467	18.6405	19.7382	18.9258	18.6857	18.9065	19.1592	18.6619	18.0539	18.9045	18.5874	18.4327	NaN	NaN	NaN	NaN	NaN	NaN	NaN	NaN	NaN	NaN	NaN	NaN	NaN	NaN	NaN	NaN	NaN	NaN	NaN	NaN	NaN	NaN
FAM21C;FAM21A	WASH complex subunit FAM21C;WASH complex subunit FAM21A	699	SAQETVKHSDLFSSSSPWDKGTKPRTKTVLS	HSDLFSS(0.002)S(0.01)S(0.988)PWDK	1	NaN	NaN	NaN	NaN	NaN	NaN	NaN	NaN	NaN	NaN	NaN	NaN	NaN	NaN	NaN	NaN	NaN	NaN	NaN	NaN	NaN	NaN	17.7803	17.87	17.3441	17.6305	17.2071	17.8081	17.5735	17.209	17.1673	17.5119	16.7694	18.9521	18.6271	18.2651	18.7153	18.0983	19.0473	18.747	18.2658	18.2438	18.4799	17.8324
FAM21C;FAM21A	WASH complex subunit FAM21C;WASH complex subunit FAM21A	264	EDNLFAPPKLTDEDFSPFGSGGGLFSGGKGL	LTDEDFS(1)PFGSGGGLFSGGK	1	20.7516	21.5438	21.3423	21.2952	21.1043	20.1381	21.0362	20.6338	20.967	20.7019	20.7421	19.0348	19.7915	19.6868	19.6718	19.4454	18.4333	19.379	18.8553	19.2382	18.8738	18.9366	19.7126	20.071	19.9307	19.7831	19.7227	19.8094	19.5766	19.462	19.4575	19.2427	19.4549	20.3129	20.8096	20.6426	20.5871	20.3687	20.4568	20.1222	19.982	19.9662	19.7201	20.0595
FAM21C;FAM21A	WASH complex subunit FAM21C;WASH complex subunit FAM21A	441	EKKVTLSSSKNLKPSSETKTQKGLFSDEEDS;EKKVTLSYSKNLKPSSETKTQKGLFSDEEDS	NLKPS(0.011)S(0.989)ETK	1	17.4141	18.4699	17.8356	17.9835	17.62	18.0457	18.089	17.3342	17.8503	17.771	17.3964	20.2757	21.5104	20.5644	20.9339	20.3317	21.0846	21.0593	20.0819	20.6981	20.5407	20.2999	NaN	NaN	NaN	NaN	NaN	NaN	NaN	NaN	NaN	NaN	NaN	19.3773	19.6194	18.9256	19.1503	18.6162	19.7231	19.5493	18.6076	18.9181	19.4543	18.5935
FAM21C;FAM21A	WASH complex subunit FAM21C;WASH complex subunit FAM21A	913	LAFPSSEHRRSHGLESVPVLPGSGEAGVSFD	S(0.437)HGLES(0.563)VPVLPGSGEAGVSFDLPAQADTLHSANK	1	NaN	NaN	NaN	NaN	NaN	NaN	NaN	NaN	NaN	NaN	NaN	NaN	NaN	NaN	NaN	NaN	NaN	NaN	NaN	NaN	NaN	NaN	NaN	NaN	NaN	NaN	NaN	NaN	NaN	NaN	NaN	NaN	NaN	17.5767	16.6352	16.7874	17.0896	16.7927	17.7557	17.6504	17.1378	17.4242	17.5779	17.1453
FAM21C;FAM21A	WASH complex subunit FAM21C;WASH complex subunit FAM21A	920	HRRSHGLESVPVLPGSGEAGVSFDLPAQADT	S(0.002)HGLES(0.002)VPVLPGS(0.96)GEAGVS(0.024)FDLPAQADT(0.006)LHS(0.006)ANK	1	NaN	NaN	NaN	NaN	NaN	NaN	NaN	NaN	NaN	NaN	NaN	17.0159	17.7936	17.491	17.794	17.5441	17.4116	17.9328	17.4541	17.5882	17.526	17.6254	16.9915	17.2169	16.5271	16.7106	16.4961	17.3951	17.3268	16.3422	16.9089	16.7112	16.2202	NaN	NaN	NaN	NaN	NaN	NaN	NaN	NaN	NaN	NaN	NaN
FAM21C;FAM21A	WASH complex subunit FAM21C;WASH complex subunit FAM21A	714	SPWDKGTKPRTKTVLSLFDEEEDKMEDQNII	T(0.006)VLS(0.994)LFDEEEDKMEDQNIIQAPQK	1	18.0375	17.3216	17.0031	17.2881	17.6965	18.3705	18.0955	18.5986	18.117	18.5397	17.888	20.5435	19.5125	19.194	19.2446	20.0223	21.4166	20.4081	21.1233	20.5572	21.021	20.2329	18.8294	18.3057	18.0431	17.8682	18.0145	18.9731	19.2586	18.7014	18.5391	19.2199	18.6963	17.0331	16.2335	15.7829	15.9961	16.1925	17.323	17.0177	16.8435	16.6488	17.9253	16.5109
FAM21C;FAM21A	WASH complex subunit FAM21C;WASH complex subunit FAM21A	616	LLFEDDVDSGGSLFGSPPTSVPPATKKKETV	VSLLFEDDVDS(0.999)GGS(0.001)LFGS(0.997)PPT(0.003)SVPPATK	1;2	NaN	NaN	NaN	NaN	NaN	NaN	NaN	NaN	NaN	NaN	NaN	NaN	NaN	NaN	NaN	NaN	NaN	NaN	NaN	NaN	NaN	NaN	14.989	15.9805	15.9104	16.0122	15.7434	15.3171	15.4192	15.3603	15.3597	15.7433	15.4707	NaN	NaN	NaN	NaN	NaN	NaN	NaN	NaN	NaN	NaN	NaN
LOC102724200;TRAPPC10	Trafficking protein particle complex subunit 10	146	DSLSVDKHGDDQPDSSSLKSRGSVHSACSSE	HGDDQPDS(0.012)S(0.631)S(0.357)LK	1	NaN	NaN	NaN	NaN	NaN	NaN	NaN	NaN	NaN	NaN	NaN	NaN	NaN	NaN	NaN	NaN	NaN	NaN	NaN	NaN	NaN	NaN	17.4548	17.0301	17.6542	17.6076	17.303	17.5858	17.6787	18.0017	17.5124	17.6182	17.7342	NaN	NaN	NaN	NaN	NaN	NaN	NaN	NaN	NaN	NaN	NaN
PHF20L1	PHD finger protein 20-like protein 1	573	SDYEDSSLEFLERCSSPLTRSSGSSLASRSM	CS(0.032)S(0.968)PLTR	1	NaN	NaN	NaN	NaN	NaN	NaN	NaN	NaN	NaN	NaN	NaN	NaN	NaN	NaN	NaN	NaN	NaN	NaN	NaN	NaN	NaN	NaN	16.8306	17.2637	17.1732	17.1196	16.9529	17.1236	16.9921	17.0015	16.6569	17.0851	16.9504	NaN	NaN	NaN	NaN	NaN	NaN	NaN	NaN	NaN	NaN	NaN
PHF20L1	PHD finger protein 20-like protein 1	558	KKKKKKKKKSKQHDYSDYEDSSLEFLERCSS	QHDYS(1)DYEDSSLEFLER	1	17.1193	17.5326	17.3478	17.5403	17.4835	17.8259	17.5188	17.5492	17.705	17.676	17.6044	17.0893	17.6265	17.65	17.4808	17.6893	17.4415	17.2043	17.0739	17.6698	17.3025	17.4057	NaN	NaN	NaN	NaN	NaN	NaN	NaN	NaN	NaN	NaN	NaN	17.8923	18.3992	18.0252	18.2897	17.9448	17.637	17.6631	17.9829	17.6141	17.9521	17.7929
PHF20L1	PHD finger protein 20-like protein 1	369	LTLVSQLSSSVINKTSPPQPVNPPRPFKHSE	T(0.134)S(0.866)PPQPVNPPRPFK	1	NaN	NaN	NaN	NaN	NaN	NaN	NaN	NaN	NaN	NaN	NaN	19.2715	19.1812	19.1813	19.212	19.088	18.3774	18.9602	18.7146	19.1326	18.8833	19.2342	NaN	NaN	NaN	NaN	NaN	NaN	NaN	NaN	NaN	NaN	NaN	18.828	18.7719	18.8593	18.6955	18.5859	18.8593	18.6705	18.759	18.7234	18.3032	18.8401
CLASRP	CLK4-associating serine/arginine rich protein	101	LDHIPDYTPPLLTTISPEQESDERKCNYERY	AHLDHIPDYTPPLLTT(0.002)IS(0.998)PEQESDERK	1	19.9446	20.1263	19.8421	20.0657	20.0113	20.2874	20.3453	19.7854	20.0115	20.1265	20.0184	21.5827	21.7139	21.5824	21.5456	21.4611	21.8645	21.7554	21.2371	21.5462	21.5843	21.238	19.0096	19.2375	19.0847	18.9026	18.9078	19.2246	19.3078	18.9373	19.0181	19.3609	18.681	21.9356	21.9361	21.8759	21.899	21.5455	22.1173	22.0835	21.6996	21.5771	22.0548	21.8543
CLASRP	CLK4-associating serine/arginine rich protein	263	AIKHAKALEEEKAMYSGRRSRRQRREFREKR	AMYS(1)GRR	1	18.4191	19.5288	18.861	18.9238	18.5522	18.9183	18.9143	18.32	18.6808	18.6625	18.3573	17.2427	18.0988	17.3974	17.6718	17.3504	17.2237	17.6556	17.1559	17.3615	17.4259	17.0808	18.9931	19.6173	18.9386	18.7569	18.2742	19.2805	19.1164	18.3414	18.5231	18.936	18.3015	17.357	18.1298	17.1458	17.2636	16.7699	17.7022	17.5331	16.5074	17.0085	17.1237	16.4598
CLASRP	CLK4-associating serine/arginine rich protein	456	RHSGGGSRDGHRYSRSPARRGGYGPRRRSRS	DGHRY(0.002)S(0.998)RS(1)PAR	1;2	19.2279	19.4957	19.3523	19.3538	19.1658	19.1697	19.197	18.8525	19.0083	18.889	19.0968	19.0047	19.2291	19.278	19.2041	19.0465	19.1245	18.9305	18.4205	18.7844	18.8106	18.8786	20.0051	19.8574	19.8926	19.8927	19.7261	19.6603	19.6787	19.7313	19.4055	19.5682	19.3305	18.5126	18.294	18.5424	18.5054	18.4289	18.3469	18.2841	18.147	18.0291	18.1243	18.0152
CLASRP	CLK4-associating serine/arginine rich protein	285	QRREFREKRLRGRKISPPSYARRDSPTYDPY	KIS(1)PPSYAR	1	23.0084	23.3062	23.2908	23.2799	23.2427	23.286	23.2153	23.0254	23.2686	23.2271	23.2651	22.6721	22.8867	22.7998	22.8705	22.8443	22.8687	22.8545	22.8568	22.9303	22.9947	22.8758	21.5613	21.7876	21.7846	21.715	21.5521	21.6953	21.7406	21.7198	21.2955	21.6069	21.6123	20.9513	21.1825	21.109	21.0573	20.9534	21.0605	20.9973	20.8353	20.8957	20.9245	20.8954
CLASRP	CLK4-associating serine/arginine rich protein	335	PGREEKITFITSFGGSDEEAAAAAAAAAASG	ITFITS(0.002)FGGS(0.998)DEEAAAAAAAAAASGVTTGKPPAPPQPGGPAPGR	1	17.6624	18.2573	18.3456	18.7972	18.6123	18.5218	18.4678	18.614	18.793	18.3948	18.7209	NaN	NaN	NaN	NaN	NaN	NaN	NaN	NaN	NaN	NaN	NaN	14.6994	14.6696	15.3477	14.8976	14.9259	15.051	15.4337	14.4965	15.1725	15.3833	15.0411	16.139	15.6636	16.232	16.0293	15.9341	15.9541	16.0983	15.9759	16.0022	16.5032	15.9895
CLASRP	CLK4-associating serine/arginine rich protein	547	PSPSPAREKLTRPAASPAVGEKLKKTEPAAG	LTRPAAS(1)PAVGEK	1	19.9956	20.3881	20.2809	20.2932	20.1211	20.2358	20.2031	20.1122	20.2844	20.1284	20.109	22.1544	22.6717	22.3976	22.5393	22.4675	22.1445	22.4978	22.1973	22.4881	22.4738	22.1874	21.3815	21.7274	21.585	21.4883	21.3336	21.472	21.4822	21.461	21.3196	21.3326	21.4307	21.7408	22.1642	22.0043	21.9752	21.8358	21.9497	21.9639	21.8672	21.7649	21.8428	21.9068
CLASRP	CLK4-associating serine/arginine rich protein	294	LRGRKISPPSYARRDSPTYDPYKRSPSESSS	RDS(0.999)PT(0.001)YDPYK	1	21.5267	22.2473	21.6999	21.9398	21.8138	21.2499	21.7863	21.8468	22.013	21.6958	22.1255	22.9066	24.3389	23.7275	23.736	23.3494	22.9382	23.3359	23.463	23.5469	23.2881	23.6767	19.6827	20.0144	19.8251	19.8368	19.6874	19.8747	19.7456	19.906	19.5815	19.8566	19.7162	21.4751	22.7004	22.3609	22.223	21.7637	21.7157	21.8981	22.1529	21.7273	21.6574	22.0202
CLASRP	CLK4-associating serine/arginine rich protein	657	SRQSRSPSPRYSREYSSSRRRSRSRSRSPHY	YSREYS(0.992)S(0.008)SR	1	18.0878	18.4557	18.1137	18.3063	18.3465	18.3416	18.0822	17.8553	18.2543	18.1321	18.0313	18.0223	17.9345	17.683	17.8773	18.1676	17.8512	17.4345	17.5126	17.3656	17.8373	17.2855	NaN	NaN	NaN	NaN	NaN	NaN	NaN	NaN	NaN	NaN	NaN	NaN	NaN	NaN	NaN	NaN	NaN	NaN	NaN	NaN	NaN	NaN
CLASRP	CLK4-associating serine/arginine rich protein	659	QSRSPSPRYSREYSSSRRRSRSRSRSPHYRH	YSREYS(0.094)S(0.164)S(0.742)R	1	NaN	NaN	NaN	NaN	NaN	NaN	NaN	NaN	NaN	NaN	NaN	17.5416	17.7263	17.7767	17.7394	17.7765	17.4812	17.4751	17.3679	17.6102	17.6176	17.4223	NaN	NaN	NaN	NaN	NaN	NaN	NaN	NaN	NaN	NaN	NaN	NaN	NaN	NaN	NaN	NaN	NaN	NaN	NaN	NaN	NaN	NaN
C19orf53	Leydig cell tumor 10 kDa protein homolog	56	AKKKGAAAATSSKTPS_______________	GAAAATS(0.002)S(0.001)KT(0.01)PS(0.986)	1	NaN	NaN	NaN	NaN	NaN	NaN	NaN	NaN	NaN	NaN	NaN	NaN	NaN	NaN	NaN	NaN	NaN	NaN	NaN	NaN	NaN	NaN	NaN	NaN	NaN	NaN	NaN	NaN	NaN	NaN	NaN	NaN	NaN	NaN	NaN	NaN	NaN	NaN	NaN	NaN	NaN	NaN	NaN	NaN
SCLY	Selenocysteine lyase	117	FHANQTSKGHTGGHHSPVKGAKPHFITSSVE	GHTGGHHS(1)PVK	1	22.9625	23.1411	23.11	22.9702	23.0791	23.0322	23.1958	22.9598	22.9745	23.0479	23.0067	22.4494	22.5585	22.5199	22.4872	22.5313	22.4893	22.706	22.4532	22.4809	22.5398	22.5637	22.9928	23.2035	22.9262	22.9427	22.9987	23.1202	23.0715	22.9817	22.7023	22.8476	23.0137	23.1872	23.3069	23.1128	23.2239	23.2307	23.3569	23.3708	23.2121	22.9382	22.9796	23.3403
SCLY	Selenocysteine lyase	15	_APAASQPSGCGKHNSPERKVYMDYNATTPL	HNS(1)PERK	1	21.7556	22.3794	22.3509	22.3191	22.2718	22.0346	22.271	21.9715	22.3945	22.162	22.3282	22.1582	22.6884	22.6978	22.7007	22.6739	22.4538	22.7446	22.4448	22.8459	22.5628	22.7894	22.9794	22.7263	23.2902	23.1571	22.9977	22.9591	23.0911	23.1058	22.8711	23.15	23.183	21.9195	21.8019	22.1282	22.1263	21.9631	22.0222	22.1153	22.1633	21.8703	22.046	22.1281
SEMA6A	Semaphorin-6A	715	VVQRKEKELTHSRRGSMSSVTKLSGLFGDTQ	RGS(0.998)MS(0.001)SVTK	1;3;4	NaN	NaN	NaN	NaN	NaN	NaN	NaN	NaN	NaN	NaN	NaN	NaN	NaN	NaN	NaN	NaN	NaN	NaN	NaN	NaN	NaN	NaN	NaN	NaN	NaN	NaN	NaN	NaN	NaN	NaN	NaN	NaN	NaN	18.229	18.4353	18.4702	18.4348	18.2408	18.4524	18.3456	18.4498	18.1132	18.2741	18.4042
SEMA6A	Semaphorin-6A	160	RNYKMDTLEPFGDEFSGMARCPYDAKHANVA	MDTLEPFGDEFS(1)GMARCPYDAK	1	NaN	NaN	NaN	NaN	NaN	NaN	NaN	NaN	NaN	NaN	NaN	20.0653	20.3667	20.3936	20.3909	20.4179	18.8441	20.2913	20.3002	20.1591	20.121	20.2904	NaN	NaN	NaN	NaN	NaN	NaN	NaN	NaN	NaN	NaN	NaN	NaN	NaN	NaN	NaN	NaN	NaN	NaN	NaN	NaN	NaN	NaN
SETD1B	Histone-lysine N-methyltransferase;Histone-lysine N-methyltransferase SETD1B	398	PPAQATPAPGFKSAFSPYQTPVAHFPPPPEE	S(0.084)AFS(0.913)PY(0.001)QT(0.001)PVAHFPPPPEEPTATAAFGAR	1	NaN	NaN	NaN	NaN	NaN	NaN	NaN	NaN	NaN	NaN	NaN	18.1397	18.5448	17.8829	18.0765	18.3091	18.7755	17.8729	18.4037	18.4691	16.9957	18.1982	16.4025	15.857	16.1882	16.0145	16.4634	16.3847	16.498	15.955	16.2055	16.4282	15.9933	NaN	NaN	NaN	NaN	NaN	NaN	NaN	NaN	NaN	NaN	NaN
MYEF2	Myelin expression factor 2	17	ADANKAEVPGATGGDSPHLQPAEPPGEPRRE	AEVPGATGGDS(1)PHLQPAEPPGEPRREPHPAEAEK	1	22.2567	22.3946	22.3232	22.4176	22.3576	21.8488	22.3743	22.2689	22.4593	22.4846	22.3073	24.237	24.2074	24.2631	24.1911	24.2301	23.5987	24.1683	24.0681	24.1839	24.0835	24.1763	22.4743	22.4262	22.4842	22.5478	22.4201	22.5396	22.4474	22.5285	22.2721	22.3632	22.3641	24.3395	24.3966	24.2447	24.3276	24.2573	24.3412	24.0699	24.4067	24.1434	24.1822	24.343
MYEF2	Myelin expression factor 2	547	MENGKSKGCGTVRFDSPESAEKACRIMNGIK	GCGTVRFDS(1)PESAEK	1	NaN	NaN	NaN	NaN	NaN	NaN	NaN	NaN	NaN	NaN	NaN	20.4377	20.1002	19.9883	19.9389	19.8477	20.202	20.209	19.5532	19.9012	19.9082	19.7904	18.3318	18.4937	18.1986	18.2506	17.9879	18.4467	18.6355	18.1811	18.0374	18.384	17.9259	19.8978	20.0636	19.9017	19.9423	19.6841	20.2575	20.0095	19.4741	19.603	20.0246	19.6213
KSR1	Kinase suppressor of Ras 1	448	LEAHEAEAEEPEAGKSEAEDDEDEVDDLPSS	ADVLEAHEAEAEEPEAGKS(1)EAEDDEDEVDDLPSSR	1	18.8008	18.7886	18.704	18.9227	18.8363	18.4552	18.9704	18.9803	19.157	18.9304	19.3123	20.5491	20.1602	20.3363	20.4787	20.615	20.0228	20.637	20.5513	20.7146	20.599	20.54	18.1484	17.9511	18.266	18.118	17.8747	18.4079	18.2662	18.3188	18.286	18.0078	18.3301	16.823	16.9471	17.1384	16.7978	16.9472	17.1918	16.9038	17.0501	16.8366	16.5946	16.9928
KSR1;KSR2	Kinase suppressor of Ras 1;Kinase suppressor of Ras 2	767	LMDMLEKLPKLNRRLSHPGHFWKSADRWRSR	RLS(1)HPGHFWK	1	17.4418	17.7938	17.6653	17.8504	17.8435	17.673	17.8776	17.9747	17.9778	18.0023	17.8395	18.2737	18.5686	18.6971	18.6618	18.749	18.6752	18.8951	18.8195	18.8062	18.7162	18.7132	18.2258	18.4271	18.677	18.5103	18.339	18.4382	18.6641	18.6677	18.5025	18.8903	18.6751	18.9701	18.8148	18.9861	19.0211	18.8947	18.9538	19.1465	19.1188	18.9142	19.3554	19.215
KSR1	Kinase suppressor of Ras 1	321	CRISFLPLTRLRRTESVPSDINNPVDRAAEP	T(0.002)ES(0.997)VPSDINNPVDR	1	19.0921	19.2024	19.2584	19.2721	19.1124	19.1721	19.3784	19.4091	19.3253	19.4232	19.3927	19.4822	19.3829	19.6616	19.71	19.3057	19.571	19.77	19.527	19.6117	19.4822	19.7355	18.994	18.49	18.5468	18.5402	18.5756	18.8096	19.018	18.963	18.2819	19.0114	18.96	20.226	20.0697	20.2844	20.3147	20.3421	20.2566	20.5059	20.5137	20.2047	20.403	20.0571
KSR1	Kinase suppressor of Ras 1	226	VFQLLPSFPTLTRSKSHESQLGNRIDDVSSM	S(0.994)HES(0.006)QLGNRIDDVSSMR	1	NaN	NaN	NaN	NaN	NaN	NaN	NaN	NaN	NaN	NaN	NaN	NaN	NaN	NaN	NaN	NaN	NaN	NaN	NaN	NaN	NaN	NaN	NaN	NaN	NaN	NaN	NaN	NaN	NaN	NaN	NaN	NaN	NaN	NaN	NaN	NaN	NaN	NaN	NaN	NaN	NaN	NaN	NaN	NaN
CACHD1	VWFA and cache domain-containing protein 1	1044	SNTRFIAAVIERHAHSPERRRRYWGRSGTES	HAHS(1)PER	1	NaN	NaN	NaN	NaN	NaN	NaN	NaN	NaN	NaN	NaN	NaN	16.1752	15.8881	16.257	16.1999	16.1211	16.64	16.4359	16.2325	16.1866	16.2129	16.2929	NaN	NaN	NaN	NaN	NaN	NaN	NaN	NaN	NaN	NaN	NaN	NaN	NaN	NaN	NaN	NaN	NaN	NaN	NaN	NaN	NaN	NaN
CTDP1	RNA polymerase II subunit A C-terminal domain phosphatase	621	LFPLRDDHTKAQRENSPAAFPDREGVPPTAL	AQRENS(1)PAAFPDREGVPPTALFHPMPVLPK	1	17.4175	17.5132	17.6914	17.9018	17.8618	17.4866	18.0619	17.4845	17.9444	17.6563	17.6114	NaN	NaN	NaN	NaN	NaN	NaN	NaN	NaN	NaN	NaN	NaN	19.2511	19.0321	19.3646	18.8918	19.1059	19.5714	19.2591	19.0919	19.2482	19.2737	18.9941	19.4751	19.2424	19.4963	19.3206	19.1946	19.62	19.7178	19.198	19.4596	19.5614	19.1444
CTDP1	RNA polymerase II subunit A C-terminal domain phosphatase	750	LESMDKEVDDILGEGSDDSDSEKRRPEEQEE	EVDDILGEGS(1)DDS(1)DS(1)EK	1;2;3	15.7506	16.1765	16.0169	16.1586	16.0245	15.5383	16.1193	16.158	16.3221	16.0493	16.0732	NaN	NaN	NaN	NaN	NaN	NaN	NaN	NaN	NaN	NaN	NaN	16.622	16.705	16.5386	16.8173	16.6866	17.0031	16.7529	16.7491	16.677	16.6464	16.7739	17.6868	17.7787	17.8261	17.7184	17.684	17.7453	17.6157	17.9155	17.7396	17.4831	17.6444
CTDP1	RNA polymerase II subunit A C-terminal domain phosphatase	753	MDKEVDDILGEGSDDSDSEKRRPEEQEEEPQ	EVDDILGEGS(1)DDS(1)DS(1)EK	1;2;3	NaN	NaN	NaN	NaN	NaN	NaN	NaN	NaN	NaN	NaN	NaN	17.8668	17.6667	17.8306	17.7171	17.2318	17.2163	17.6942	17.7796	17.6511	17.6436	17.7841	NaN	NaN	NaN	NaN	NaN	NaN	NaN	NaN	NaN	NaN	NaN	NaN	NaN	NaN	NaN	NaN	NaN	NaN	NaN	NaN	NaN	NaN
CTDP1	RNA polymerase II subunit A C-terminal domain phosphatase	720	QDGEQPGPSRRKRQPSMSETMPLYTLCKEDL	RQPS(0.999)MS(0.001)ETMPLYTLCK	1	18.5734	19.0588	19.2641	19.1341	19.2932	18.8056	18.7024	18.8148	19.1249	19.1053	19.0509	20.2274	20.5735	20.5837	20.609	20.6914	19.2475	19.984	20.3172	20.5059	20.3911	20.3101	20.1443	20.508	20.597	20.2731	20.3699	20.0542	20.1145	20.2144	20.1388	20.2544	20.2209	21.6971	22.1614	22.14	22.05	21.8737	21.7117	21.7729	21.7598	21.4685	21.7552	21.7728
CTDP1	RNA polymerase II subunit A C-terminal domain phosphatase	722	GEQPGPSRRKRQPSMSETMPLYTLCKEDLES	RQPS(0.231)MS(0.754)ET(0.015)MPLYTLCK	1	18.5968	19.0203	18.8554	18.9627	19.0332	18.4763	18.5779	18.7336	18.9725	18.8926	18.9966	18.6064	18.7264	18.7859	18.779	18.8277	18.2754	18.4096	18.5875	18.6834	18.6329	18.4403	NaN	NaN	NaN	NaN	NaN	NaN	NaN	NaN	NaN	NaN	NaN	NaN	NaN	NaN	NaN	NaN	NaN	NaN	NaN	NaN	NaN	NaN
CTDP1	RNA polymerase II subunit A C-terminal domain phosphatase	355	ESSSESEGTKSSSSASDGESEGKRGRQKPKA	SSSS(0.002)AS(0.998)DGESEGK	1	15.5602	15.8335	16.0221	15.8674	15.7021	15.712	15.9567	15.9539	16.3365	16.0513	16.0782	19.5951	19.9022	19.9901	20.1444	19.9583	19.8236	20.1318	19.8751	20.5653	20.2129	20.3811	NaN	NaN	NaN	NaN	NaN	NaN	NaN	NaN	NaN	NaN	NaN	19.8963	19.8666	20.0002	19.9307	19.7821	20.2591	20.1192	20.183	19.8004	20.1028	20.0846
CTDP1	RNA polymerase II subunit A C-terminal domain phosphatase	359	ESEGTKSSSSASDGESEGKRGRQKPKAAPEG	SSSSAS(0.017)DGES(0.982)EGK	1	19.0667	19.2237	19.0668	19.0996	19.2422	19.0133	19.3351	19.2705	19.6881	19.2666	19.4678	NaN	NaN	NaN	NaN	NaN	NaN	NaN	NaN	NaN	NaN	NaN	17.7784	17.9496	17.7973	17.6466	17.7141	17.8376	17.9408	18.0125	17.6769	17.9504	17.8675	NaN	NaN	NaN	NaN	NaN	NaN	NaN	NaN	NaN	NaN	NaN
CTDP1	RNA polymerase II subunit A C-terminal domain phosphatase	785	RKPGTRRERTLGAPASSERSAAGGRGPRGHK	TLGAPAS(0.978)S(0.022)ER	1	NaN	NaN	NaN	NaN	NaN	NaN	NaN	NaN	NaN	NaN	NaN	NaN	NaN	NaN	NaN	NaN	NaN	NaN	NaN	NaN	NaN	NaN	18.04	18.2256	17.6689	17.7133	17.3873	18.3724	18.2417	17.8233	17.8855	18.1731	17.6587	NaN	NaN	NaN	NaN	NaN	NaN	NaN	NaN	NaN	NaN	NaN
PTPN9	Protein-tyrosine-phosphatase;Tyrosine-protein phosphatase non-receptor type 9	314	DIRRENPVGTFHCSMSPGNLEKNRYGDVPCL	ENPVGTFHCS(0.001)MS(0.999)PGNLEK	1	NaN	NaN	NaN	NaN	NaN	NaN	NaN	NaN	NaN	NaN	NaN	NaN	NaN	NaN	NaN	NaN	NaN	NaN	NaN	NaN	NaN	NaN	NaN	NaN	NaN	NaN	NaN	NaN	NaN	NaN	NaN	NaN	NaN	17.3231	16.9106	16.9203	16.8578	16.6672	17.353	17.254	16.5699	16.6844	17.5075	16.4424
CEP192		137	KEHQFIQPSFGYFIRSPEKREPIALIRKSDV	EHQFIQPS(0.016)FGYFIRS(0.984)PEK	1	17.4809	17.7891	17.7209	17.7455	17.7356	16.9429	17.8624	17.8299	17.9272	17.7338	17.4827	18.8184	18.9516	18.8075	18.9512	19.0769	18.0621	18.7184	18.9701	19.2771	18.9216	18.9377	NaN	NaN	NaN	NaN	NaN	NaN	NaN	NaN	NaN	NaN	NaN	NaN	NaN	NaN	NaN	NaN	NaN	NaN	NaN	NaN	NaN	NaN
CEP192	Centrosomal protein of 192 kDa	1355	VVLKGEVISSGSKPLSPGPCLDIPSILSNKQ	PLS(1)PGPCLDIPSILSNK	1;2	17.583	17.8157	17.2947	17.5508	17.5276	16.9558	18.2137	17.9755	18.4368	18.0441	18.2212	19.0956	19.2607	18.7555	19.043	19.2416	19.8611	19.6846	19.5626	19.8255	19.5837	19.7598	18.1453	18.1033	17.7524	17.7426	17.9231	18.4798	19.0393	18.7565	18.6378	19.4263	19.0487	19.3571	19.1273	18.6423	18.8769	19.1545	19.8322	20.0079	19.6656	19.616	19.9416	20.0113
CEP192	Centrosomal protein of 192 kDa	1710	GNVSLDVLPVKGPQGSPLLSRAARPPLDQLA	GPQGS(1)PLLSR	1	NaN	NaN	NaN	NaN	NaN	NaN	NaN	NaN	NaN	NaN	NaN	19.7519	19.8199	19.7735	19.8712	19.862	20.8305	20.1901	20.0633	20.2289	20.0802	20.1331	17.9627	17.8552	17.9617	17.5055	17.94	18.0563	18.3155	18.1786	18.2408	18.3049	18.1226	19.592	19.5298	19.5242	19.3535	19.5332	19.9232	20.0531	19.7953	19.8483	19.8808	19.9233
CEP192	Centrosomal protein of 192 kDa	800	HPVSCQEPIDEDQRISPKDKSTAGREFSGQV	SGLSCQVGSATSHPVSCQEPIDEDQRIS(1)PK	1	20.4599	20.3779	20.2865	20.1097	20.4784	20.0265	20.3201	20.2512	20.5854	20.3887	20.3339	19.3899	19.6473	19.632	19.7379	20.0499	18.9726	19.7249	19.6852	19.99	19.7268	19.8769	19.69	19.6434	19.2088	19.2372	19.4126	19.7808	19.2417	19.682	19.1753	19.3094	19.3875	20.0958	20.2948	20.0727	20.0152	20.179	20.3189	19.8484	20.1283	19.7036	19.7891	19.7891
SYN3	Synapsin-3	227	LSPQSGSPQQQRSPGSPQLSRASSGSSPNQA	SPGS(1)PQLSR	1	NaN	NaN	NaN	NaN	NaN	NaN	NaN	NaN	NaN	NaN	NaN	NaN	NaN	NaN	NaN	NaN	NaN	NaN	NaN	NaN	NaN	NaN	17.7173	18.3214	18.4656	18.2731	18.0544	17.5204	17.5284	17.8237	17.5416	17.5963	17.6985	NaN	NaN	NaN	NaN	NaN	NaN	NaN	NaN	NaN	NaN	NaN
STIL	SCL-interrupting locus protein	706	AQIQRLLEAQSLMPCSPKTTAVEDTVQAGRQ	LLEAQSLMPCS(1)PK	1	NaN	NaN	NaN	NaN	NaN	NaN	NaN	NaN	NaN	NaN	NaN	NaN	NaN	NaN	NaN	NaN	NaN	NaN	NaN	NaN	NaN	NaN	17.6897	18.0747	17.635	17.6622	17.5456	18.1378	17.8738	17.0931	17.4819	17.7298	17.1674	18.76	19.14	18.737	18.8022	18.3534	19.0276	18.9035	18.2156	18.3715	18.6643	18.132
STIL	SCL-interrupting locus protein	348	SQKLSSGKMPIHDHDSGVEDEDFSPRPIPSP	MPIHDHDS(1)GVEDEDFSPRPIPSPHPVSQK	1	NaN	NaN	NaN	NaN	NaN	NaN	NaN	NaN	NaN	NaN	NaN	18.8497	18.4564	18.6881	18.2489	18.8564	19.2153	18.372	18.3708	18.8853	18.8372	18.6992	NaN	NaN	NaN	NaN	NaN	NaN	NaN	NaN	NaN	NaN	NaN	NaN	NaN	NaN	NaN	NaN	NaN	NaN	NaN	NaN	NaN	NaN
STIL	SCL-interrupting locus protein	1089	KKYMKRYGLLQSSDNSEDEEEPPDNADSKSE	RYGLLQS(0.449)S(0.551)DNS(1)EDEEEPPDNADSK	1;2	19.0316	19.1572	19.3301	19.2609	19.1815	18.4257	19.1872	19.1711	19.4058	19.0534	19.1686	NaN	NaN	NaN	NaN	NaN	NaN	NaN	NaN	NaN	NaN	NaN	17.9014	18.2611	18.1016	18.0866	17.9022	18.1543	17.9679	18.0171	17.9097	17.7769	17.823	NaN	NaN	NaN	NaN	NaN	NaN	NaN	NaN	NaN	NaN	NaN
TTN	Titin	6596	LDDECEYACGVEDRKSRARLFVEEIPVEIIR	LDDECEY(0.005)ACGVEDRKS(0.995)R	1	NaN	NaN	NaN	NaN	NaN	NaN	NaN	NaN	NaN	NaN	NaN	NaN	NaN	NaN	NaN	NaN	NaN	NaN	NaN	NaN	NaN	NaN	18.9591	18.8505	19.3317	18.9715	19.0181	19.1148	18.6772	19.2545	19.1114	18.4589	18.9495	NaN	NaN	NaN	NaN	NaN	NaN	NaN	NaN	NaN	NaN	NaN
HNRNPUL1	Heterogeneous nuclear ribonucleoprotein U-like protein 1	616	PPPPQPPPQQPPPPPSYSPARNPPGASTYNK	APQQQPPPQQPPPPQPPPQQPPPPPS(0.611)YS(0.389)PAR	1	14.5992	14.7845	13.9999	14.8151	14.5491	15.0136	14.685	14.8262	14.4923	14.5067	15.0325	NaN	NaN	NaN	NaN	NaN	NaN	NaN	NaN	NaN	NaN	NaN	16.048	16.0838	16.0281	16.1362	16.3113	16.2772	16.5817	16.4486	16.2644	16.3233	15.9135	NaN	NaN	NaN	NaN	NaN	NaN	NaN	NaN	NaN	NaN	NaN
HNRNPUL1	Heterogeneous nuclear ribonucleoprotein U-like protein 1	618	PPQPPPQQPPPPPSYSPARNPPGASTYNKNS	APQQQPPPQQPPPPQPPPQQPPPPPS(0.143)Y(0.001)S(0.856)PAR	1	NaN	NaN	NaN	NaN	NaN	NaN	NaN	NaN	NaN	NaN	NaN	14.8201	14.7974	15.0361	15.0625	15.0357	15.5196	15.3481	14.6241	15.2055	14.8692	15.3328	NaN	NaN	NaN	NaN	NaN	NaN	NaN	NaN	NaN	NaN	NaN	NaN	NaN	NaN	NaN	NaN	NaN	NaN	NaN	NaN	NaN	NaN
HNRNPUL1	Heterogeneous nuclear ribonucleoprotein U-like protein 1	94	RGRGYFEHREDRRGRSPQPPAEEDEDDFDDT	GRS(1)PQPPAEEDEDDFDDTLVAIDTYNCDLHFK	1	23.201	23.2288	23.3986	23.4619	23.3322	23.4924	23.5649	23.4815	23.5669	23.4174	23.6251	23.7583	23.9492	24.0002	24.0354	24.0367	24.1148	24.1959	23.9829	24.216	23.9186	24.1726	22.6185	22.6913	22.7267	22.5955	22.6887	22.7854	22.784	22.7936	22.6575	22.8332	22.8203	23.4645	23.4885	23.5955	23.5176	23.4704	23.6444	23.6686	23.5876	23.3744	23.618	23.5971
HNRNPUL1	Heterogeneous nuclear ribonucleoprotein U-like protein 1	412	RKKRNYILDQTNVYGSAQRRKMRPFEGFQRK	RNYILDQT(0.001)NVYGS(0.999)AQR	1	NaN	NaN	NaN	NaN	NaN	NaN	NaN	NaN	NaN	NaN	NaN	NaN	NaN	NaN	NaN	NaN	NaN	NaN	NaN	NaN	NaN	NaN	NaN	NaN	NaN	NaN	NaN	NaN	NaN	NaN	NaN	NaN	NaN	NaN	NaN	NaN	NaN	NaN	NaN	NaN	NaN	NaN	NaN	NaN
EPB41L3	Band 4.1-like protein 3;Band 4.1-like protein 3, N-terminally processed	55	EQQQALEQFAAAAAHSTPVRREVTDKEQEFA	AGAPVPEPPKEEQQQALEQFAAAAAHS(0.649)T(0.351)PVRR	1	15.4706	15.7565	15.9796	15.733	15.7215	16.5823	15.7103	15.5283	15.9401	15.7786	15.8562	20.0362	20.2833	20.1744	20.2733	20.2901	20.6313	20.3001	20.2091	20.4867	20.2384	20.2734	17.8668	17.8482	17.8328	17.5315	17.5183	17.961	18.0181	17.7978	17.9144	18.0757	17.5989	19.9471	20.0226	19.9613	19.7336	19.706	20.109	20.1453	19.7399	19.9458	19.9484	19.8029
EPB41L3	Band 4.1-like protein 3;Band 4.1-like protein 3, N-terminally processed	462	ASVNENHEIYMKDSMSAAEVGTGQYATTKGI	DSMS(1)AAEVGTGQYATTK	1	NaN	NaN	NaN	NaN	NaN	NaN	NaN	NaN	NaN	NaN	NaN	NaN	NaN	NaN	NaN	NaN	NaN	NaN	NaN	NaN	NaN	NaN	19.2608	18.8839	18.5754	18.5785	18.5655	19.0498	19.1373	18.9119	18.7394	18.8472	18.8594	NaN	NaN	NaN	NaN	NaN	NaN	NaN	NaN	NaN	NaN	NaN
EPB41L3;EPB41L2;EPB41	Band 4.1-like protein 3;Band 4.1-like protein 3, N-terminally processed;Band 4.1-like protein 2;Protein 4.1	950	KTITYESPQTVKGGISETRIEKRIVITGDGD;STTTTQITKTVKGGISETRIEKRIVITGDAD;TTTTTHITKTVKGGISETRIEKRIVITGDAD;TTTTTHITKTVKGGISETRIEKRIVITGDGD	GGIS(1)ETRIEK	1	18.1224	18.6005	18.3111	18.2993	18.2553	17.4159	18.0944	18.3982	18.4881	18.5682	18.3001	19.2348	19.4406	19.3055	19.4439	19.4658	18.5359	19.324	19.4449	19.4007	19.4954	19.4601	NaN	NaN	NaN	NaN	NaN	NaN	NaN	NaN	NaN	NaN	NaN	19.2815	19.4278	19.4828	19.3269	19.06	19.4916	19.3613	19.4272	19.1962	19.1363	19.4174
EPB41L3	Band 4.1-like protein 3;Band 4.1-like protein 3, N-terminally processed	478	AAEVGTGQYATTKGISQTNLITTVTPEKKAE	GIS(1)QTNLITTVTPEK	1;2	17.1848	17.272	17.2867	17.5886	17.5275	17.7443	17.6639	17.8088	17.7321	17.8277	17.714	21.3708	21.7	21.4813	21.6889	21.5336	21.5537	21.8211	22.2057	21.9497	22.2302	21.8927	17.7052	17.6752	17.7571	17.8116	17.7595	17.7638	18.1768	17.9913	17.6571	18.4379	17.9856	21.7509	22.0978	21.9901	21.9958	22.0146	21.6066	21.963	22.355	21.9414	22.1758	21.9506
EPB41L3	Band 4.1-like protein 3;Band 4.1-like protein 3, N-terminally processed	99	DDKLSQKSSSSKLSRSPLKIVKKPKSMQCKV	LS(0.001)RS(0.999)PLK	1;3	16.7832	17.0946	17.0069	16.86	16.7326	16.647	16.9925	16.6492	16.8741	16.7956	16.6792	19.4676	19.9597	19.8537	19.9283	19.7464	19.6163	19.8113	19.5383	19.8023	19.7117	19.4886	17.1592	17.2918	17.2509	17.2631	17.06	17.3379	17.3397	16.9742	17.1271	17.1959	17.1321	17.9336	18.0815	17.967	17.7771	17.7101	18.091	17.9879	17.8354	17.7232	18.0167	17.9002
EPB41L3	Band 4.1-like protein 3;Band 4.1-like protein 3, N-terminally processed	5	___________MTTESGSDSESKPDQEAEPQ	TTES(1)GS(0.887)DS(0.113)ESKPDQEAEPQEAAGAQGR	1;2;3	NaN	NaN	NaN	NaN	NaN	NaN	NaN	NaN	NaN	NaN	NaN	NaN	NaN	NaN	NaN	NaN	NaN	NaN	NaN	NaN	NaN	NaN	NaN	NaN	NaN	NaN	NaN	NaN	NaN	NaN	NaN	NaN	NaN	NaN	NaN	NaN	NaN	NaN	NaN	NaN	NaN	NaN	NaN	NaN
EPB41L3	Band 4.1-like protein 3;Band 4.1-like protein 3, N-terminally processed	7	_________MTTESGSDSESKPDQEAEPQEA	T(0.008)T(0.009)ES(0.987)GS(0.989)DS(0.006)ES(0.001)KPDQEAEPQEAAGAQGR	1;2;3	19.6197	20.494	21.0661	20.8573	20.3421	20.2226	20.3499	20.2745	20.4062	20.3846	20.4997	20.8643	22.2034	22.4258	22.2709	22.0574	21.5087	21.4608	21.4217	21.8868	21.5169	21.3634	18.8797	19.5759	19.9416	19.6208	19.4361	18.9653	18.8709	19.053	18.8329	18.9667	19.0212	19.5706	20.3817	20.791	20.4514	20.5069	19.5846	19.5444	19.992	19.8015	19.8637	19.6343
EPB41L3	Band 4.1-like protein 3;Band 4.1-like protein 3, N-terminally processed	9	_______MTTESGSDSESKPDQEAEPQEAAG	T(0.099)T(0.113)ES(0.8)GS(0.988)DS(0.972)ES(0.028)KPDQEAEPQEAAGAQGR	1;2;3	NaN	NaN	NaN	NaN	NaN	NaN	NaN	NaN	NaN	NaN	NaN	NaN	NaN	NaN	NaN	NaN	NaN	NaN	NaN	NaN	NaN	NaN	18.8079	19.5451	20.0334	19.8731	19.5709	18.8858	19.1005	19.2688	19.0144	19.3806	19.2074	NaN	NaN	NaN	NaN	NaN	NaN	NaN	NaN	NaN	NaN	NaN
EPB41L3	Band 4.1-like protein 3;Band 4.1-like protein 3, N-terminally processed	11	_____MTTESGSDSESKPDQEAEPQEAAGAQ	T(0.003)T(0.003)ES(0.028)GS(0.08)DS(0.943)ES(0.943)KPDQEAEPQEAAGAQGR	1;2;3	NaN	NaN	NaN	NaN	NaN	NaN	NaN	NaN	NaN	NaN	NaN	NaN	NaN	NaN	NaN	NaN	NaN	NaN	NaN	NaN	NaN	NaN	17.4689	18.2309	18.5779	18.323	18.0231	17.4179	17.4851	17.8187	17.4147	17.6394	17.5919	NaN	NaN	NaN	NaN	NaN	NaN	NaN	NaN	NaN	NaN	NaN
EPB41L3	Band 4.1-like protein 3;Band 4.1-like protein 3, N-terminally processed	88	AAKQLEYQQLEDDKLSQKSSSSKLSRSPLKI	QLEYQQLEDDKLS(1)QK	1;2;3	19.7993	19.9273	20.008	20.0872	20.0232	19.1771	20.1862	20.0802	20.1983	20.121	20.3076	21.7988	21.8256	21.9481	21.9664	21.9087	21.0489	22.3687	22.163	22.0617	22.0264	22.3242	20.7881	20.6086	20.8567	20.763	20.6985	20.833	20.6425	21.1606	20.8325	20.4333	20.8807	20.8183	20.6355	20.8688	20.7848	20.6353	20.8416	20.6617	21.0643	20.7703	20.2813	20.9029
EPB41L3	Band 4.1-like protein 3;Band 4.1-like protein 3, N-terminally processed	420	KFRYSGRTQAQTRRASALIDRPAPYFERSSS	RAS(1)ALIDRPAPYFER	1	20.4006	20.3726	20.2564	20.2938	20.3018	20.4916	20.6926	20.482	20.5491	20.5268	20.2829	19.8227	19.6102	19.7433	19.9419	19.8194	20.043	20.1503	19.7916	19.9634	20.2128	19.8572	18.4829	18.1156	18.369	18.3184	18.3095	18.3253	18.49	18.4729	18.1461	18.6695	18.4711	19.0672	19.23	19.0498	19.0454	18.8263	19.1749	19.2642	19.0993	19.0318	19.5505	19.0021
EPB41L3	Band 4.1-like protein 3;Band 4.1-like protein 3, N-terminally processed	591	TSTDTAVTNEWEKRLSTSPVRLAARQEDAPM	RLS(0.999)T(0.06)S(0.941)PVR	1;2	16.5384	17.2258	17.2069	17.1266	17.0712	16.5141	16.7825	16.5001	16.8466	16.6945	16.4412	NaN	NaN	NaN	NaN	NaN	NaN	NaN	NaN	NaN	NaN	NaN	NaN	NaN	NaN	NaN	NaN	NaN	NaN	NaN	NaN	NaN	NaN	NaN	NaN	NaN	NaN	NaN	NaN	NaN	NaN	NaN	NaN	NaN
EPB41L3	Band 4.1-like protein 3;Band 4.1-like protein 3, N-terminally processed	593	TDTAVTNEWEKRLSTSPVRLAARQEDAPMIE	RLS(0.971)T(0.032)S(0.997)PVR	1;2	17.7853	18.4263	18.256	18.2139	17.9465	18.0822	17.9872	18.0449	18.228	18.0418	18.071	16.6651	17.4288	16.7014	17.141	17.0832	16.6847	17.1952	16.7794	17.348	17.0874	17.2906	NaN	NaN	NaN	NaN	NaN	NaN	NaN	NaN	NaN	NaN	NaN	16.5343	16.1473	16.3616	16.5161	16.335	16.2589	16.4863	16.2156	16.3865	16.1842	16.0467
EPB41L3	Band 4.1-like protein 3;Band 4.1-like protein 3, N-terminally processed	577	HQTNISELKRTFLETSTDTAVTNEWEKRLST	RT(0.062)FLET(0.062)S(0.691)T(0.184)DTAVTNEWEK	1	NaN	NaN	NaN	NaN	NaN	NaN	NaN	NaN	NaN	NaN	NaN	NaN	NaN	NaN	NaN	NaN	NaN	NaN	NaN	NaN	NaN	NaN	NaN	NaN	NaN	NaN	NaN	NaN	NaN	NaN	NaN	NaN	NaN	18.6866	18.0628	17.999	17.9358	17.7318	18.7289	18.5321	18.3329	18.3232	18.5766	17.7194
EPB41L3	Band 4.1-like protein 3;Band 4.1-like protein 3, N-terminally processed	443	PYFERSSSKRYTMSRSLDGASVNENHEIYMK	S(1)LDGAS(1)VNENHEIYMK	1;2	18.9538	18.7488	18.5936	18.6722	18.7385	19.8957	19.2464	19.0463	19.3546	18.9924	19.1378	20.5775	20.144	20.0362	19.9869	20.4043	20.786	20.8014	20.5985	20.6645	20.5329	20.4236	17.9903	17.6269	17.1061	17.0787	17.3679	18.0681	18.1061	17.9035	17.4596	17.8289	17.4831	21.337	20.7978	20.8066	20.7197	20.6695	21.5247	21.5241	21.3579	21.0558	21.2118	21.0405
EPB41L3	Band 4.1-like protein 3;Band 4.1-like protein 3, N-terminally processed	448	SSSKRYTMSRSLDGASVNENHEIYMKDSMSA	S(1)LDGAS(1)VNENHEIYMK	1;2	21.5631	21.6348	21.4773	21.3679	21.6918	21.9188	21.785	21.7405	21.8841	21.867	21.6322	22.2449	22.4771	22.2329	21.9059	22.212	22.3203	22.4229	22.3307	22.3564	22.2947	22.1648	22.8256	22.6442	22.8099	22.4551	22.5526	22.8963	23.0292	22.8689	22.5216	22.8226	22.6279	21.8418	21.8538	21.7286	21.6098	21.6787	21.9557	22.1115	21.9055	21.6799	21.978	21.7756
EPB41L3	Band 4.1-like protein 3;Band 4.1-like protein 3, N-terminally processed	793	ESSTVKTETISFGSVSPGGVKLEISTKEVPV	TETISFGSVS(1)PGGVK	1	21.0876	21.3727	20.8542	21.0576	20.8109	20.9928	21.4668	20.8969	21.3083	21.2769	21.1441	20.0272	20.4617	20.0076	20.2223	19.8953	19.9785	20.5023	20.0094	20.3393	20.1423	20.1762	22.1064	22.0507	21.4893	21.7835	21.4838	22.1562	22.2091	21.8702	21.912	22.1209	21.6875	22.9364	22.764	22.3508	22.4808	22.2844	22.9133	23.0015	22.6811	22.6295	22.7882	22.7225
MADD	MAP kinase-activating death domain protein	1201	GGEGSVHLASSRGTLSDSEIETNSATSTIFG	GT(0.091)LS(0.903)DS(0.006)EIETNSATSTIFGK	1	NaN	NaN	NaN	NaN	NaN	NaN	NaN	NaN	NaN	NaN	NaN	19.9067	19.0855	18.7381	19.1366	19.5721	19.3409	19.566	19.6528	19.7343	19.273	19.5018	NaN	NaN	NaN	NaN	NaN	NaN	NaN	NaN	NaN	NaN	NaN	NaN	NaN	NaN	NaN	NaN	NaN	NaN	NaN	NaN	NaN	NaN
MADD	MAP kinase-activating death domain protein	1203	EGSVHLASSRGTLSDSEIETNSATSTIFGKA	GT(0.001)LS(0.104)DS(0.883)EIET(0.012)NSATSTIFGK	1	NaN	NaN	NaN	NaN	NaN	NaN	NaN	NaN	NaN	NaN	NaN	NaN	NaN	NaN	NaN	NaN	NaN	NaN	NaN	NaN	NaN	NaN	NaN	NaN	NaN	NaN	NaN	NaN	NaN	NaN	NaN	NaN	NaN	NaN	NaN	NaN	NaN	NaN	NaN	NaN	NaN	NaN	NaN	NaN
MADD	MAP kinase-activating death domain protein	1232	KAHSLKPSIKEKLAGSPIRTSEDVSQRVYLY	LAGS(1)PIR	1	18.5304	18.5418	18.3807	18.6924	18.3891	18.5389	18.6919	18.5214	18.6406	18.5655	18.2389	NaN	NaN	NaN	NaN	NaN	NaN	NaN	NaN	NaN	NaN	NaN	18.9962	19.084	18.9461	18.8344	18.54	19.0825	19.11	18.442	18.7538	18.9944	18.6307	20.1468	20.0733	19.9988	19.5783	19.6682	20.217	20.2005	19.4316	19.7759	20.1482	19.5549
MADD	MAP kinase-activating death domain protein	910	SSVIKHSPTVKREPPSPQGRSSNSSENQQFL	REPPS(1)PQGR	1	NaN	NaN	NaN	NaN	NaN	NaN	NaN	NaN	NaN	NaN	NaN	18.0098	18.1331	18.3779	18.1207	18.2158	18.2019	18.3316	18.1406	18.094	18.0649	18.212	NaN	NaN	NaN	NaN	NaN	NaN	NaN	NaN	NaN	NaN	NaN	NaN	NaN	NaN	NaN	NaN	NaN	NaN	NaN	NaN	NaN	NaN
TCF3	Transcription factor E2-alpha	328	AGTSQWPRAGAPGALSPSYDGGLHGLQSKIE	AGAPGALS(0.995)PS(0.003)Y(0.002)DGGLHGLQSK	1	18.6277	18.9051	18.7701	18.528	18.8173	18.6172	18.5237	18.456	18.763	18.4905	18.4833	19.351	19.6	19.5247	19.4931	19.5955	19.2925	19.2547	19.34	19.5088	19.2086	19.2158	18.5117	18.6557	18.3192	18.4844	18.2943	18.477	18.2653	18.4081	18.3375	17.9614	18.1894	20.5714	20.9159	20.186	20.5952	20.694	20.6666	20.0482	20.5814	20.2416	20.1771	20.2295
TCF3	Transcription factor E2-alpha	330	TSQWPRAGAPGALSPSYDGGLHGLQSKIEDH	AGAPGALS(0.011)PS(0.557)Y(0.432)DGGLHGLQSK	1	NaN	NaN	NaN	NaN	NaN	NaN	NaN	NaN	NaN	NaN	NaN	NaN	NaN	NaN	NaN	NaN	NaN	NaN	NaN	NaN	NaN	NaN	14.9066	15.2886	14.4992	14.9819	15.0422	15.1066	14.6323	15.1829	14.4433	14.9396	15.011	NaN	NaN	NaN	NaN	NaN	NaN	NaN	NaN	NaN	NaN	NaN
TCF3	Transcription factor E2-alpha	88	GFLSGELALNSPGPLSPSGMKGTSQYYPSYS	DAGVGGLTQAGFLSGELALNSPGPLS(0.992)PS(0.008)GMK	1	NaN	NaN	NaN	NaN	NaN	NaN	NaN	NaN	NaN	NaN	NaN	17.512	17.7947	17.8508	18.0672	17.8301	17.5259	17.6112	17.7498	17.6902	17.5376	17.9503	16.7121	16.9827	17.1144	16.815	17.0125	16.9608	17.0777	17.0666	16.8109	17.2533	17.0207	18.7893	18.778	18.9535	18.8404	18.6574	18.9413	18.8383	18.7475	18.6482	18.8288	18.7569
TCF3	Transcription factor E2-alpha	463	REEKEDEENTSAADHSEEEKKELKAPRARTS	EDEENTSAADHS(1)EEEKK	1	18.7914	17.4412	17.6719	17.7994	18.0872	17.3207	18.7347	18.9374	19.1473	18.9197	19.0304	NaN	NaN	NaN	NaN	NaN	NaN	NaN	NaN	NaN	NaN	NaN	17.7307	16.6887	16.8849	17.1862	17.5255	18.1324	17.6568	18.1226	17.7844	17.2527	17.5949	NaN	NaN	NaN	NaN	NaN	NaN	NaN	NaN	NaN	NaN	NaN
TCF3	Transcription factor E2-alpha	479	EEEKKELKAPRARTSSTDEVLSLEEKDLRDR	TSS(1)TDEVLSLEEK	1	NaN	NaN	NaN	NaN	NaN	NaN	NaN	NaN	NaN	NaN	NaN	20.0212	17.4076	17.9331	17.7392	17.6345	20.6544	20.1575	20.3107	20.363	20.2442	20.3109	NaN	NaN	NaN	NaN	NaN	NaN	NaN	NaN	NaN	NaN	NaN	20.3572	18.1183	18.2561	18.01	18.26	20.3792	20.2841	20.6038	20.2884	20.5584	20.3933
GPSM1	G-protein-signaling modulator 1	492	DVRVHVPRTSIPRAPSSDEECFFDLLTKFQS	TSIPRAPS(1)S(1)DEECFFDLLTK	1;2	16.1745	15.4688	15.5913	15.5728	15.8085	16.3343	16.3995	16.1364	16.1568	15.9427	16.1414	20.8145	20.163	20.3099	20.5042	20.6049	21.1739	21.0848	20.7459	20.9308	20.8182	20.8671	16.165	15.3702	15.6522	15.8271	15.5	16.331	16.4881	16.2156	16.0802	16.0472	16.0905	21.7917	21.2094	21.1408	21.2834	21.3673	21.7911	21.9255	21.8771	21.4981	21.7902	21.8408
GPSM1	G-protein-signaling modulator 1	493	VRVHVPRTSIPRAPSSDEECFFDLLTKFQSS	TSIPRAPS(1)S(1)DEECFFDLLTK	1;2	21.8812	21.2406	21.2826	21.4973	21.4995	21.6078	21.9416	21.5872	21.8366	21.7979	21.6801	14.9545	15.0251	15.1404	15.3026	15.4555	16.0758	15.7746	15.2278	15.8752	15.4396	15.7045	21.3579	20.8084	20.7435	20.9323	20.9806	21.3708	21.3562	21.2612	21.0927	21.3198	21.336	18.5021	17.8759	17.5253	18.117	18.1701	18.6947	18.7949	18.7422	18.6065	18.727	18.9253
GPSM1	G-protein-signaling modulator 1	471	QEGPDAERRPREGSHSPLDSADVRVHVPRTS	EGS(1)HS(1)PLDSADVR	1;2	17.3121	17.4716	17.3051	17.4971	17.4082	17.0174	17.238	17.0317	17.2244	17.4269	17.2033	21.3887	21.8935	21.9092	21.8159	21.554	21.6867	21.6351	21.0351	21.2316	21.1966	21.1272	19.9343	19.8413	19.8989	19.6166	19.6693	20.0216	19.987	19.8033	19.485	19.7808	19.6174	21.5592	21.803	21.5499	21.4845	21.3533	21.6898	21.5268	21.1524	21.0551	21.3471	20.9101
GPSM1	G-protein-signaling modulator 1	545	APTLEDRIAQPSMTASPQTEEFFDLIASSQS	IAQPSMT(0.006)AS(0.994)PQTEEFFDLIASSQSR	1	14.8056	15.0925	15.0908	15.1398	15.4555	15.2268	15.2163	15.0402	15.2836	15.3631	15.4024	16.7668	17.4992	17.8971	17.5046	17.5334	16.7017	17.1468	16.8079	16.9914	16.6073	16.9457	16.4105	16.6311	16.9232	16.6436	16.5255	16.4988	16.5718	16.4559	16.439	16.7124	16.4562	17.6294	17.861	17.8619	17.4393	17.6196	17.5261	17.8043	17.0597	16.958	17.2729	16.7706
KCNQ5;KCNQ4	Potassium voltage-gated channel subfamily KQT member 5;Potassium voltage-gated channel subfamily KQT member 4	457	DITAEGSPTKVQKSWSFNDRTRFRPSLRLKS	S(0.02)WS(0.968)FNDRT(0.012)R	1	NaN	NaN	NaN	NaN	NaN	NaN	NaN	NaN	NaN	NaN	NaN	NaN	NaN	NaN	NaN	NaN	NaN	NaN	NaN	NaN	NaN	NaN	NaN	NaN	NaN	NaN	NaN	NaN	NaN	NaN	NaN	NaN	NaN	16.9269	17.2165	17.1088	16.9587	16.8585	17.0278	17.1963	16.882	16.972	17.2279	17.0524
EXOC7	Exocyst complex component 7	205	KEHFHKSSSSSGVPYSPAIPNKRKDTPTKKP	SSSSSGVPYS(1)PAIPNK	1	19.7755	19.7989	19.7905	19.8322	20.051	19.7248	19.8846	20.1758	19.9475	20.0359	19.7686	20.5117	20.5596	20.6252	20.7542	20.8861	20.4577	20.7195	20.83	20.6532	20.8979	20.6982	20.9728	21.1434	21.2999	20.7729	21.1325	21.3419	21.3912	21.0379	20.9498	21.3203	21.0346	21.3595	21.5416	21.6424	21.2894	21.3256	21.6528	21.7379	21.1876	21.237	21.5059	21.3226
WDR47	WD repeat-containing protein 47	394	QNPGPAKQEKNELRDSTEQFQEYYRQRLRYQ	NELRDS(0.988)T(0.012)EQFQEYYR	1	NaN	NaN	NaN	NaN	NaN	NaN	NaN	NaN	NaN	NaN	NaN	NaN	NaN	NaN	NaN	NaN	NaN	NaN	NaN	NaN	NaN	NaN	NaN	NaN	NaN	NaN	NaN	NaN	NaN	NaN	NaN	NaN	NaN	NaN	NaN	NaN	NaN	NaN	NaN	NaN	NaN	NaN	NaN	NaN
WDR47	WD repeat-containing protein 47	276	SKLSPYPSSPMRRPQSADAYMTRSLNPALDG	RPQS(1)ADAYMTR	1	18.4226	18.4566	18.4271	18.4815	18.3489	18.7067	18.7035	18.803	18.9208	18.709	18.6986	19.2858	19.093	19.1403	19.2096	19.2007	19.0012	19.4056	19.0499	19.3575	19.2319	19.2533	NaN	NaN	NaN	NaN	NaN	NaN	NaN	NaN	NaN	NaN	NaN	18.9579	19.0139	18.7407	18.8257	18.8065	19.2023	19.0699	19.1058	18.9381	19.1418	18.9835
AKAP9	A-kinase anchor protein 9	31	KLAQFRQRKAQSDGQSPSKKQKKKRKTSSSK	AQSDGQS(1)PSK	1	19.3479	19.6693	19.6309	19.6338	19.6211	18.8337	19.364	19.309	19.5013	19.3618	19.156	21.0278	21.5208	21.3567	21.3062	21.3621	20.2959	21.1494	21.1062	21.2533	20.9847	20.9607	19.6242	19.8409	19.7968	19.7388	19.6036	19.5088	19.6794	19.4351	19.4732	19.8178	19.4241	21.108	21.4117	21.47	21.304	21.1295	21.2504	21.2116	21.0591	21.0558	20.9996	20.9444
AKAP9	A-kinase anchor protein 9	33	AQFRQRKAQSDGQSPSKKQKKKRKTSSSKHD	AQSDGQS(0.365)PS(0.635)KK	1	NaN	NaN	NaN	NaN	NaN	NaN	NaN	NaN	NaN	NaN	NaN	NaN	NaN	NaN	NaN	NaN	NaN	NaN	NaN	NaN	NaN	NaN	NaN	NaN	NaN	NaN	NaN	NaN	NaN	NaN	NaN	NaN	NaN	NaN	NaN	NaN	NaN	NaN	NaN	NaN	NaN	NaN	NaN	NaN
AKAP9	A-kinase anchor protein 9	982	KQKHGEISFLNEEVKSLKQEKEQVSLRCREL	HGEIS(0.006)FLNEEVKS(0.994)LK	1	20.0332	20.2252	19.8239	20.1413	19.9167	20.607	20.6502	20.4175	20.7425	20.4025	20.6592	NaN	NaN	NaN	NaN	NaN	NaN	NaN	NaN	NaN	NaN	NaN	NaN	NaN	NaN	NaN	NaN	NaN	NaN	NaN	NaN	NaN	NaN	NaN	NaN	NaN	NaN	NaN	NaN	NaN	NaN	NaN	NaN	NaN
AKAP9		3112	IIKLKHIFLVTFSSHSHNVKDTIYINYSRG_	HIFLVT(0.007)FS(0.007)S(0.007)HS(0.978)HNVK	1	NaN	NaN	NaN	NaN	NaN	NaN	NaN	NaN	NaN	NaN	NaN	17.462	17.7095	17.7112	17.7288	17.5776	17.4816	17.9809	17.6282	17.6001	17.9392	17.8434	NaN	NaN	NaN	NaN	NaN	NaN	NaN	NaN	NaN	NaN	NaN	16.9186	16.5744	17.0426	16.9944	16.8663	16.9925	17.3047	16.6471	16.7128	16.9759	16.808
MRPL19	39S ribosomal protein L19, mitochondrial	77	IVDKHRPVEPERRFLSPEFIPRRGRTDPLKF	FLS(1)PEFIPR	1	NaN	NaN	NaN	NaN	NaN	NaN	NaN	NaN	NaN	NaN	NaN	NaN	NaN	NaN	NaN	NaN	NaN	NaN	NaN	NaN	NaN	NaN	16.2171	16.6796	16.8033	16.3256	16.4993	16.3423	16.6718	16.632	16.6925	16.6101	16.4508	16.4634	16.5769	17.0322	16.7249	16.6586	16.4356	16.6862	16.77	16.8229	16.6419	16.462
APP	Amyloid beta A4 protein;N-APP;Soluble APP-alpha;Soluble APP-beta;C99;Beta-amyloid protein 42;Beta-amyloid protein 40;C83;P3(42);P3(40);C80;Gamma-secretase C-terminal fragment 59;Gamma-secretase C-terminal fragment 57;Gamma-secretase C-terminal fragment 50;C31	344	ADKKAVIQHFQEKVESLEQEAANERQQLVET	VES(1)LEQEAANER	1	15.3405	15.2285	15.3708	15.0569	15.3401	14.9874	15.7985	15.6575	15.4182	16.0124	15.3948	NaN	NaN	NaN	NaN	NaN	NaN	NaN	NaN	NaN	NaN	NaN	NaN	NaN	NaN	NaN	NaN	NaN	NaN	NaN	NaN	NaN	NaN	NaN	NaN	NaN	NaN	NaN	NaN	NaN	NaN	NaN	NaN	NaN
CDK5RAP2	CDK5 regulatory subunit-associated protein 2	844	LASLPSCKENPEDVLSPTSVATYLSSKSQPS	ENPEDVLS(0.998)PT(0.001)S(0.001)VATYLSSK	1	17.1913	17.6222	17.6531	17.5158	17.508	17.0752	16.8766	16.6687	17.0932	16.9467	16.7722	17.0167	17.6043	17.4288	17.3634	17.3359	16.6138	17.0263	16.756	16.7185	16.2147	16.3634	NaN	NaN	NaN	NaN	NaN	NaN	NaN	NaN	NaN	NaN	NaN	16.0686	16.0918	16.4197	15.9419	15.9915	15.4031	15.3676	15.7812	15.727	15.8804	15.5694
CDK5RAP2	CDK5 regulatory subunit-associated protein 2	1008	LFSEIHNLQNKFRDLSPPRYDSLVQSQAREL	FRDLS(1)PPRYDSLVQSQAR	1	18.7372	19.0123	19.0619	19.1136	19.2787	19.1405	19.1102	19.2735	19.2121	19.1541	19.0884	19.2173	19.4967	19.4373	19.5186	19.4225	19.2235	19.3357	19.3281	19.6055	19.333	19.3695	17.6596	17.822	17.8749	17.6384	17.4907	17.5171	17.6424	17.8086	17.6288	17.6684	17.6096	19.2043	19.4161	19.573	19.4529	19.4302	19.3282	19.3436	19.4249	19.2888	19.3656	19.2808
CDK5RAP2	CDK5 regulatory subunit-associated protein 2	547	QPPGSKTIFSKEKKQSSDYEELIQVLKKEQD	KQS(0.803)S(0.197)DYEELIQVLK	1	17.0586	16.9149	16.4341	16.9048	16.6216	16.4974	17.6133	17.1867	17.738	17.4292	17.5655	17.7897	17.5594	16.9409	17.3095	17.1514	17.1643	18.5653	18.189	18.4394	18.3285	18.3744	17.2892	16.7612	16.186	16.4288	16.1173	17.3914	17.2687	16.9528	17.2954	16.828	17.193	18.394	17.6087	17.3605	17.6367	17.2806	18.6832	18.3647	18.2932	18.2855	17.7671	18.2962
CDK5RAP2	CDK5 regulatory subunit-associated protein 2	548	PPGSKTIFSKEKKQSSDYEELIQVLKKEQDI	KQS(0.5)S(0.5)DYEELIQVLK	1	NaN	NaN	NaN	NaN	NaN	NaN	NaN	NaN	NaN	NaN	NaN	17.7897	17.5594	16.9409	17.3095	17.1514	17.1643	18.5653	18.189	18.4394	18.3285	18.3744	NaN	NaN	NaN	NaN	NaN	NaN	NaN	NaN	NaN	NaN	NaN	NaN	NaN	NaN	NaN	NaN	NaN	NaN	NaN	NaN	NaN	NaN
CDK5RAP2	CDK5 regulatory subunit-associated protein 2	1260	KENDKLRESLSRKTVSLEHLQREYASVKEEN	TVS(1)LEHLQR	1	NaN	NaN	NaN	NaN	NaN	NaN	NaN	NaN	NaN	NaN	NaN	17.4022	16.7839	17.1272	17.12	17.2046	19.277	17.8463	18.194	17.8747	17.7246	17.8254	NaN	NaN	NaN	NaN	NaN	NaN	NaN	NaN	NaN	NaN	NaN	NaN	NaN	NaN	NaN	NaN	NaN	NaN	NaN	NaN	NaN	NaN
CHD1L	Chromodomain-helicase-DNA-binding protein 1-like	255	IPGLVEGSTKRKRVLSPEELEDRQKKRQEAA	RVLS(1)PEELEDRQK	1	NaN	NaN	NaN	NaN	NaN	NaN	NaN	NaN	NaN	NaN	NaN	19.8067	19.6303	19.5619	19.8253	19.725	19.6877	20.2433	19.9108	20.3357	20.1387	20.0362	18.8396	18.3502	17.8933	18.0321	18.1106	18.8474	18.6249	18.3464	18.3768	18.4008	18.3563	18.6282	17.5995	17.8982	17.831	17.8039	18.5277	18.6607	18.3902	18.516	18.7493	18.4082
GPALPP1	GPALPP motifs-containing protein 1	103	FFGPALPPGFKKQDDSPPRPIIGPALPPGFI	QDDS(1)PPRPIIGPALPPGFIK	1	22.2435	22.5757	22.5637	22.6428	22.6612	22.8983	22.7286	22.46	22.5753	22.6399	22.5963	23.0148	23.181	23.3072	23.2571	23.1405	23.4103	23.3122	23.0727	23.2436	23.2438	23.2718	22.5754	22.706	22.8466	22.7563	22.7279	22.7711	22.8405	22.6888	22.5523	22.7987	22.7463	25.232	25.3935	25.7166	25.4318	25.3824	25.3941	25.3885	25.4461	25.155	25.3302	25.4009
TNNT2	Troponin T, cardiac muscle	63	EEEEAKEAEDGPMEESKPKPRSFMPNLVPPK	EAEDGPMEES(1)K	1	15.8486	16.4015	15.8108	15.9747	15.897	15.0396	16.2342	16.3036	16.2985	16.1097	15.8458	16.2132	16.8964	15.9153	16.2586	16.3418	14.877	16.569	16.7313	16.524	16.204	16.244	NaN	NaN	NaN	NaN	NaN	NaN	NaN	NaN	NaN	NaN	NaN	NaN	NaN	NaN	NaN	NaN	NaN	NaN	NaN	NaN	NaN	NaN
GPATCH4	G patch domain-containing protein 4	128	ATLTSGGEKPNKDLESCSDDDNQGSKSPKIL	DLES(1)CS(1)DDDNQGSK	1;2;3	NaN	NaN	NaN	NaN	NaN	NaN	NaN	NaN	NaN	NaN	NaN	17.3361	17.9908	17.8688	18.4132	18.2228	17.1488	17.6709	17.48	18.5777	17.5184	17.8627	17.8767	17.6714	17.8468	17.8492	17.8411	18.0086	17.6715	18.0022	17.8127	17.6623	18.0394	16.1787	16.7412	17.0001	17.43	16.9396	17.3529	16.5475	17.6854	17.4007	16.572	16.7751
GPATCH4	G patch domain-containing protein 4	130	LTSGGEKPNKDLESCSDDDNQGSKSPKILTD	DLES(1)CS(1)DDDNQGSK	1;2;3	21.8108	22.2793	22.3942	22.4249	22.5563	21.659	22.0836	22.0422	22.2135	21.8361	22.1951	21.5893	21.998	22.1088	22.1192	22.2722	21.4267	21.9053	21.7742	21.9009	21.5221	21.8554	21.646	22.0337	22.2273	22.1213	22.1057	21.6462	21.5841	21.8622	21.6372	21.3216	21.7583	22.088	22.4535	22.6759	22.5058	22.5723	22.0921	22.0226	22.2971	22.0573	21.6708	22.1261
GPATCH4	G patch domain-containing protein 4	137	PNKDLESCSDDDNQGSKSPKILTDEMLLQAC	DLES(0.838)CS(0.167)DDDNQGS(0.995)K	1;2;3	17.7444	19.1468	19.2503	19.186	19.1163	21.0674	18.4223	18.2203	18.3168	18.4074	17.942	NaN	NaN	NaN	NaN	NaN	NaN	NaN	NaN	NaN	NaN	NaN	17.9077	19.2259	19.0938	19.0202	18.4864	18.1657	19.1869	18.2548	18.0591	19.9339	18.427	NaN	NaN	NaN	NaN	NaN	NaN	NaN	NaN	NaN	NaN	NaN
GPATCH4	G patch domain-containing protein 4	139	KDLESCSDDDNQGSKSPKILTDEMLLQACEG	DLES(0.442)CS(0.558)DDDNQGS(0.004)KS(0.996)PK	1;2;3	16.6579	17.9744	17.9964	17.9049	17.8279	19.9346	17.2309	16.9069	17.1256	16.8933	16.9988	17.5372	18.4189	18.7451	18.7255	18.5957	20.4715	17.9791	17.6831	18.1516	17.7921	17.568	17.2155	18.9796	18.8851	18.4059	18.1456	17.6876	18.8004	17.6429	17.6896	19.7004	17.946	17.5492	18.9584	18.91	18.7488	18.2966	17.4695	18.8742	17.4061	17.6262	19.827	18.0187
GPATCH4	G patch domain-containing protein 4	318	MGVLEEGGKGKEAAGSVRTEEVESRAYADPC	EAAGS(0.993)VRT(0.007)EEVESR	1	NaN	NaN	NaN	NaN	NaN	NaN	NaN	NaN	NaN	NaN	NaN	NaN	NaN	NaN	NaN	NaN	NaN	NaN	NaN	NaN	NaN	NaN	17.1028	16.9419	16.9126	17.1541	17.0817	17.0978	16.7791	17.151	17.0673	17.1527	16.8598	NaN	NaN	NaN	NaN	NaN	NaN	NaN	NaN	NaN	NaN	NaN
GPATCH4	G patch domain-containing protein 4	220	KKKKRRQKEEEEATASERNDADEKHPEHAEQ	EEEEAT(0.002)AS(0.998)ERNDADEK	1	19.3762	20.0849	20.0334	20.0893	20.0599	17.0042	19.5901	19.7643	19.7617	19.4268	19.6262	18.6701	18.8866	18.7433	18.741	19.0243	16.0194	18.9816	19.1575	19.2441	19.0239	18.8475	20.4778	20.6768	20.893	20.7342	20.4446	20.4389	19.5824	20.567	20.14	19.2993	20.1848	20.4797	19.856	19.9694	20.2404	20.1382	20.6102	20.1659	20.66	20.2656	19.6109	20.5553
GPATCH4	G patch domain-containing protein 4	286	TSGLGELNSREQTNQSLRKGKKKKRWHHEEE	EQT(0.001)NQS(0.999)LRK	1	17.9834	18.9974	18.2783	18.3524	18.2187	18.5846	18.3953	17.8357	18.274	18.164	17.8157	NaN	NaN	NaN	NaN	NaN	NaN	NaN	NaN	NaN	NaN	NaN	NaN	NaN	NaN	NaN	NaN	NaN	NaN	NaN	NaN	NaN	NaN	18.8501	19.1731	18.8691	18.8321	18.6557	19.0697	19.0419	18.6209	18.4577	18.6354	18.3086
ABLIM1	Actin-binding LIM protein 1	155	NGRDCLCQLCAQPMSSSPKETTFSSNCAGCG	DCLCQLCAQPMS(0.127)S(0.747)S(0.127)PK	1	NaN	NaN	NaN	NaN	NaN	NaN	NaN	NaN	NaN	NaN	NaN	17.9832	18.4712	18.4679	18.4965	18.2485	18.1807	18.2866	18.1022	18.1956	18.3923	18.1127	NaN	NaN	NaN	NaN	NaN	NaN	NaN	NaN	NaN	NaN	NaN	16.9605	17.3794	17.6563	17.5428	17.4206	16.9956	17.3867	17.3706	16.9488	16.9099	17.0089
ABLIM1	Actin-binding LIM protein 1	156	GRDCLCQLCAQPMSSSPKETTFSSNCAGCGR	VTFNGRDCLCQLCAQPMSS(0.129)S(0.871)PK	1	NaN	NaN	NaN	NaN	NaN	NaN	NaN	NaN	NaN	NaN	NaN	17.6072	18.1149	18.3276	18.3298	17.8111	17.7769	18.0785	17.6681	17.9094	17.7945	17.9638	NaN	NaN	NaN	NaN	NaN	NaN	NaN	NaN	NaN	NaN	NaN	16.2089	16.5702	16.8958	16.7074	16.6396	16.7237	16.5349	16.3092	16.4073	16.3727	16.3104
ABLIM1	Actin-binding LIM protein 1	646	LPDGHMPAMRMDRGVSMPNMLEPKIFPYEML	MDRGVS(1)MPNMLEPK	1	18.5867	18.5322	18.4902	18.5494	18.6642	18.6773	18.722	18.7925	18.8396	18.8837	18.7847	21.7234	21.6469	21.4265	21.5957	21.7702	21.7439	21.8492	22.1468	22.0007	21.8871	21.7783	20.7891	20.8919	21.0774	20.9518	20.6364	20.884	21.1297	20.9965	20.7993	20.9553	20.9767	21.7271	21.715	21.6338	21.5883	21.4363	21.5524	22.0038	21.679	21.5382	22.0009	21.7758
ABLIM1	Actin-binding LIM protein 1	362	EPFYTSGYDDKQERQSLGESPRTLSPTPSAE	QERQS(1)LGESPR	1;2	18.8482	18.8271	18.9914	18.8566	18.9969	17.9103	18.4866	18.8064	18.7312	18.7213	18.5717	19.1802	18.9213	19.1684	19.0369	19.3037	18.3492	18.8983	19.0441	19.1085	19.1059	19.0718	18.6251	18.6756	19.0021	18.5589	18.5703	18.7609	18.5143	18.3736	18.314	18.0754	18.1765	NaN	NaN	NaN	NaN	NaN	NaN	NaN	NaN	NaN	NaN	NaN
ABLIM1	Actin-binding LIM protein 1	480	PPIYKQHAALAAQSKSSEDIIKFSKFPAAQA	S(0.997)S(0.003)EDIIK	1	20.6878	19.6279	19.4628	19.7442	19.6496	19.5143	20.9572	21.0511	20.9501	21.1644	21.2753	21.1819	20.3168	20.3233	20.484	20.3851	20.3803	21.5328	21.6534	21.5922	21.7257	21.892	16.6068	16.2955	16.0225	16.0675	16.397	16.5118	17.4812	16.7141	16.5175	18.602	16.6321	21.727	20.5847	20.4523	20.7198	20.4536	21.6971	21.9436	21.9951	21.7594	21.5587	22.0918
ABLIM1	Actin-binding LIM protein 1	371	DKQERQSLGESPRTLSPTPSAEGYQDVRDRM	TLS(0.998)PT(0.002)PSAEGYQDVRDR	1;2;3	19.6773	19.9648	19.9801	19.9048	19.8102	19.8967	19.8101	19.8397	20.0354	19.8226	19.9206	22.5411	22.8427	22.8272	23.0334	22.7878	22.3692	22.973	22.9974	23.1744	22.9421	23.0213	21.8944	22.0342	22.107	21.8398	21.8889	21.9958	21.9318	22.2414	22.0788	22.096	22.2291	22.4924	22.8217	22.9109	22.7634	22.7984	22.7495	22.6967	23.0359	22.6941	22.5928	22.751
ABLIM1	Actin-binding LIM protein 1	375	RQSLGESPRTLSPTPSAEGYQDVRDRMIHRS	T(0.679)LS(0.32)PT(0.001)PS(1)AEGYQDVRDR	1;2;3	NaN	NaN	NaN	NaN	NaN	NaN	NaN	NaN	NaN	NaN	NaN	17.8042	18.3514	18.3158	18.415	18.2202	18.0752	18.0815	18.1948	18.3061	18.2018	18.2997	NaN	NaN	NaN	NaN	NaN	NaN	NaN	NaN	NaN	NaN	NaN	NaN	NaN	NaN	NaN	NaN	NaN	NaN	NaN	NaN	NaN	NaN
ABLIM1	Actin-binding LIM protein 1	526	GPPSFAVVGPDMKRRSSGREEDDEELLRRRQ	S(0.88)S(0.12)GREEDDEELLR	1	NaN	NaN	NaN	NaN	NaN	NaN	NaN	NaN	NaN	NaN	NaN	17.3234	18.0479	17.6181	17.7936	17.6575	18.479	17.7002	17.2569	17.7301	17.4443	17.7826	NaN	NaN	NaN	NaN	NaN	NaN	NaN	NaN	NaN	NaN	NaN	NaN	NaN	NaN	NaN	NaN	NaN	NaN	NaN	NaN	NaN	NaN
ABLIM1	Actin-binding LIM protein 1	580	KESRERSSLLASRYDSPINSASHIPSSKTAS	SSLLASRYDS(0.998)PINS(0.001)ASHIPSSK	1	18.4275	19.3427	18.7973	18.475	18.4042	19.032	18.6723	18.209	18.5175	18.6035	18.2831	17.9584	19.2254	18.4384	18.2391	17.7294	18.5374	17.7482	17.1444	17.8594	17.3931	16.6315	17.5209	18.1376	16.8378	17.0907	16.8747	17.8824	16.7046	16.5245	16.7215	17.0505	16.5747	19.7004	20.286	19.0003	19.2732	19.1746	19.988	19.1842	18.9385	18.9352	19.2264	18.7844
ABLIM1	Actin-binding LIM protein 1	392	EGYQDVRDRMIHRSTSQGSINSPVYSRHSYT	STS(1)QGSINSPVYSR	1;2	19.0553	19.2481	19.1612	19.2621	19.2972	19.4184	19.3369	19.4689	19.4851	19.3718	19.344	19.826	19.842	19.9202	20.0564	20.1868	20.0816	20.1088	20.2004	20.2087	20.1958	20.0819	18.7735	18.9471	18.8777	18.7611	18.701	19.0217	18.8528	19.1536	18.8756	18.8345	19.0816	21.1245	21.0198	20.9868	20.9943	21.0228	20.9904	21.0723	21.0962	21.0412	20.9397	21.1461
ABLIM1	Actin-binding LIM protein 1	395	QDVRDRMIHRSTSQGSINSPVYSRHSYTPTT	S(0.006)T(0.008)S(0.986)QGS(1)INSPVYSR	1;2	NaN	NaN	NaN	NaN	NaN	NaN	NaN	NaN	NaN	NaN	NaN	NaN	NaN	NaN	NaN	NaN	NaN	NaN	NaN	NaN	NaN	NaN	NaN	NaN	NaN	NaN	NaN	NaN	NaN	NaN	NaN	NaN	NaN	NaN	NaN	NaN	NaN	NaN	NaN	NaN	NaN	NaN	NaN	NaN
ABLIM1	Actin-binding LIM protein 1	398	RDRMIHRSTSQGSINSPVYSRHSYTPTTSRS	STSQGSINS(1)PVYSR	1;2	17.2061	18.3436	17.6964	17.7346	17.6559	18.3473	17.4562	17.2861	17.0659	17.3931	17.0717	17.8239	18.8314	18.4792	18.3158	18.4069	18.0484	18.1828	17.8939	17.8457	18.1046	17.4286	19.0424	19.8236	19.376	19.1302	18.7961	19.4289	19.4918	18.7162	18.8136	19.3956	18.6973	19.7845	20.4319	20.3006	20.0331	19.7079	20.3274	20.3586	19.5156	19.5218	20.1278	19.5797
ABLIM1	Actin-binding LIM protein 1	595	SPINSASHIPSSKTASLPGYGRNGLHRPVST	TAS(1)LPGYGR	1	20.5964	20.7887	20.7927	20.7895	20.7859	20.7836	20.9034	20.9616	20.9292	20.8864	20.9578	21.6276	21.3952	21.6368	21.514	21.54	21.3235	21.7067	21.8213	21.759	21.7503	21.8586	19.6725	19.7709	19.8011	19.7629	19.5586	19.6933	19.8727	19.7929	19.6804	19.8107	19.8674	20.6364	20.6402	20.7035	20.6475	20.5629	20.6373	20.7067	20.7656	20.5133	20.6082	20.6917
ABLIM1	Actin-binding LIM protein 1	307	SSESIYSRPGSSIPGSPGHTIYAKVDNEILD	TSSESIYSRPGSSIPGS(1)PGHTIYAK	1	15.2615	16.104	15.9106	15.5295	15.8299	15.9018	15.4595	14.969	15.549	15.0419	15.1654	NaN	NaN	NaN	NaN	NaN	NaN	NaN	NaN	NaN	NaN	NaN	17.6236	19.0279	18.4742	18.4716	18.4795	18.1764	17.4707	17.9127	17.651	17.6072	17.3839	NaN	NaN	NaN	NaN	NaN	NaN	NaN	NaN	NaN	NaN	NaN
MYO6	Unconventional myosin-VI	267	CAGASEDIREKLHLSSPDNFRYLNRGCTRYF	LHLS(0.004)S(0.996)PDNFR	1	NaN	NaN	NaN	NaN	NaN	NaN	NaN	NaN	NaN	NaN	NaN	17.4098	16.8287	16.843	16.8411	16.9082	17.191	17.3912	17.0728	16.867	17.3166	16.955	NaN	NaN	NaN	NaN	NaN	NaN	NaN	NaN	NaN	NaN	NaN	17.7125	17.693	17.8303	17.6371	17.6279	17.8253	17.8863	17.7285	17.6784	17.7919	17.6209
MYO6	Unconventional myosin-VI	297	FANKETDKQILQNRKSPEYLKAGSMKDPLLD	QILQNRKS(1)PEYLK	1	NaN	NaN	NaN	NaN	NaN	NaN	NaN	NaN	NaN	NaN	NaN	NaN	NaN	NaN	NaN	NaN	NaN	NaN	NaN	NaN	NaN	NaN	NaN	NaN	NaN	NaN	NaN	NaN	NaN	NaN	NaN	NaN	NaN	17.8069	17.6099	17.4217	17.5023	17.2192	17.9942	18.1875	17.8902	17.8502	18.4745	17.928
OGFR	Opioid growth factor receptor	297	HSKGGGRVDEGPQPRSVEPQDAGPLERSQGD	S(1)VEPQDAGPLER	1	18.5493	18.4627	18.3005	18.5567	18.8013	19.0865	19.2153	19.1331	19.249	19.0159	19.1941	19.0793	18.7695	18.767	19.099	19.094	19.5403	19.2793	19.3907	19.6384	19.4637	19.4429	17.5872	16.8343	17.2111	17.2591	17.0305	17.7306	17.8098	17.7893	17.6314	17.528	17.6802	19.8048	19.9411	19.6028	20.1113	19.7847	20.0239	19.9905	20.1673	19.7743	19.8626	19.8814
OGFR	Opioid growth factor receptor	368	SEVEKIALNLEGCALSQGSLRTGTQEVGGQD	IALNLEGCALS(0.997)QGS(0.003)LR	1	NaN	NaN	NaN	NaN	NaN	NaN	NaN	NaN	NaN	NaN	NaN	17.8173	17.7696	17.654	17.9555	17.7048	17.9781	17.9444	18.268	18.2774	18.0154	17.3725	17.313	17.2204	17.3733	17.2039	17.2329	17.3862	17.4826	17.4886	17.1839	17.3852	17.2438	NaN	NaN	NaN	NaN	NaN	NaN	NaN	NaN	NaN	NaN	NaN
OGFR	Opioid growth factor receptor	432	AAVASGGAQTLALAGSPAPSGHPKAGHSENG	VDEGAGDSAAVASGGAQTLALAGS(0.998)PAPS(0.002)GHPK	1	19.6276	19.8421	19.7793	19.7927	19.6866	20.2115	19.8087	19.7735	19.8562	19.5772	19.6354	21.9336	22.4983	21.9975	21.9564	21.9992	20.2542	22.0983	21.7089	22.0781	21.7865	21.6906	19.0141	18.6864	18.4634	18.7328	18.5766	18.9455	18.9448	18.9882	18.6966	19.4659	18.9454	19.9565	20.1311	19.6255	19.7293	19.6669	20.2229	19.9075	19.5574	19.1057	19.593	19.2707
OGFR	Opioid growth factor receptor	263	LPHPLEGSRKVEEEGSPGDPDHEASTQGRTC	VEEEGS(1)PGDPDHEASTQGR	1	22.1976	21.4286	21.5056	21.656	21.8258	22.3339	22.2835	22.1057	22.2926	22.338	22.1612	23.6617	22.6837	23.0067	23.1909	23.4244	23.915	23.823	23.6424	23.7079	23.7	23.6886	22.5422	21.7712	21.8024	22.0432	22.3013	22.8129	22.6671	22.5461	22.3313	22.5681	22.5286	24.6322	23.9241	23.9921	24.1733	24.3518	24.9053	24.7852	24.6547	24.3412	24.7031	24.5458
OGFR	Opioid growth factor receptor	326	GDEAGGHGEDRPEPLSPKESKKRKLELSRRE	SVEPQDAGPLERS(1)QGDEAGGHGEDRPEPLS(1)PK	1;2	24.0328	24.0063	24.1103	24.0047	24.1825	23.9633	24.1575	23.909	24.1359	23.9847	23.9494	23.2094	23.1936	23.3091	23.3224	23.3361	23.3115	23.3709	23.2637	23.2838	23.1537	23.1984	22.9347	22.9072	22.9303	22.8765	22.7696	23.0202	22.8159	22.9142	22.6852	22.7083	22.8228	23.626	23.7274	23.68	23.7064	23.5965	23.7335	23.6321	23.5057	23.4131	23.5372	23.4609
CCBL2	Kynurenine--oxoglutarate transaminase 3	189	VFIPLRSKPVYGKRWSSSDWTLDPQELESKF	RWS(0.624)S(0.157)S(0.157)DWT(0.062)LDPQELESK	1	17.2642	17.6556	17.6318	18.0694	17.7081	17.577	17.8054	17.0616	17.8381	17.8332	17.6984	NaN	NaN	NaN	NaN	NaN	NaN	NaN	NaN	NaN	NaN	NaN	NaN	NaN	NaN	NaN	NaN	NaN	NaN	NaN	NaN	NaN	NaN	NaN	NaN	NaN	NaN	NaN	NaN	NaN	NaN	NaN	NaN	NaN
SMARCA1;SMARCA5	Probable global transcription activator SNF2L1;SWI/SNF-related matrix-associated actin-dependent regulator of chromatin subfamily A member 5	755	ANYAVDAYFREALRVSEPKAPKAPRPPKQPN;ANYAVDAYFREALRVSEPKIPKAPRPPKQPN	EALRVS(1)EPK	1	18.2688	19.623	18.8105	18.9666	18.2914	18.8212	18.8164	18.1087	18.6048	18.5863	18.2662	19.6884	21.2308	20.2803	20.6974	20.0074	20.4618	20.5744	19.6841	20.1609	20.2273	19.784	19.5041	20.1262	19.2759	19.4392	18.7905	19.6086	19.4922	19.0479	19.0429	19.4615	18.8895	19.5542	20.374	19.5027	19.7427	19.1545	19.9819	19.9045	19.2322	19.4752	19.7353	19.1472
SMARCA1	Probable global transcription activator SNF2L1	116	QTELFAHFIQPSAQKSPTSPLNMKLGRPRIK	S(1)PT(0.01)S(0.99)PLNMK	1;2	NaN	NaN	NaN	NaN	NaN	NaN	NaN	NaN	NaN	NaN	NaN	NaN	NaN	NaN	NaN	NaN	NaN	NaN	NaN	NaN	NaN	NaN	NaN	NaN	NaN	NaN	NaN	NaN	NaN	NaN	NaN	NaN	NaN	NaN	NaN	NaN	NaN	NaN	NaN	NaN	NaN	NaN	NaN	NaN
SMARCA1	Probable global transcription activator SNF2L1	119	LFAHFIQPSAQKSPTSPLNMKLGRPRIKKDE	S(1)PT(0.002)S(0.998)PLNMK	1;2	19.8413	20.6364	20.3881	20.4242	20.3171	19.641	20.0124	19.9898	20.1559	19.8086	19.9064	21.2059	22.1627	22.0925	21.8944	21.7214	21.2269	21.505	21.4927	21.7255	21.221	21.4431	20.3174	21.0819	20.968	20.7369	20.4598	20.2168	20.2982	20.4097	20.3533	20.1616	20.2047	22.2723	22.8174	22.7162	22.4961	22.5067	22.1883	21.9625	22.1771	22.2264	21.9658	22.0266
SNRPC	U1 small nuclear ribonucleoprotein C	17	PKFYCDYCDTYLTHDSPSVRKTHCSGRKHKE	FYCDYCDTYLTHDS(1)PSVR	1	22.2777	23.5261	22.3974	22.6818	21.8483	22.5222	22.4314	21.1804	22.0766	21.936	21.4116	22.4115	23.4897	22.7828	23.0635	22.4271	23.1957	22.9147	22.1336	23.1249	22.5318	22.2706	19.3613	19.7362	19.2446	19.2389	18.6481	19.6366	19.4487	18.7752	19.0966	19.2703	18.5594	23.0167	23.2516	23.067	23.1693	22.1096	23.2053	23.1851	22.684	22.8352	23.3715	22.7242
TMEM38B	Trimeric intracellular cation channel type B	208	WQQPFSSCEKKSEAKSPSNGVGSLASKPVDV	S(0.992)PS(0.008)NGVGSLASKPVDVASDNVK	1;4	18.0053	19.2834	17.6235	17.8081	17.5862	18.5889	18.3629	17.0132	17.9886	17.9751	17.0387	NaN	NaN	NaN	NaN	NaN	NaN	NaN	NaN	NaN	NaN	NaN	18.1701	18.6001	17.9132	17.7431	17.1272	18.3118	18.2493	17.0241	17.5819	17.8798	16.9787	NaN	NaN	NaN	NaN	NaN	NaN	NaN	NaN	NaN	NaN	NaN
ANKS6	Ankyrin repeat and SAM domain-containing protein 6	20	LTTMLRNGAPLTRLPSDKLKAVIPPFLPPSS	NGAPLTRLPS(1)DK	1	NaN	NaN	NaN	NaN	NaN	NaN	NaN	NaN	NaN	NaN	NaN	NaN	NaN	NaN	NaN	NaN	NaN	NaN	NaN	NaN	NaN	NaN	NaN	NaN	NaN	NaN	NaN	NaN	NaN	NaN	NaN	NaN	NaN	17.7526	17.6298	17.6292	17.5709	17.5109	17.814	17.8135	17.8292	17.8349	17.9498	17.7803
ANKS6	Ankyrin repeat and SAM domain-containing protein 6	129	GVSRHGGELLNRSGGSIDNVLSQIAAQRKKA	S(0.271)GGS(0.725)IDNVLS(0.003)QIAAQRK	1	NaN	NaN	NaN	NaN	NaN	NaN	NaN	NaN	NaN	NaN	NaN	NaN	NaN	NaN	NaN	NaN	NaN	NaN	NaN	NaN	NaN	NaN	NaN	NaN	NaN	NaN	NaN	NaN	NaN	NaN	NaN	NaN	NaN	NaN	NaN	NaN	NaN	NaN	NaN	NaN	NaN	NaN	NaN	NaN
ANKS6	Ankyrin repeat and SAM domain-containing protein 6	204	SKRPPSGTSTTSKSTSPTLTPSPSPKGHTAE	ST(0.001)S(0.998)PT(0.001)LTPSPSPK	1	17.801	17.8102	17.9705	17.9038	18.0728	18.1241	18.0851	17.8678	18.1723	18.058	17.9471	NaN	NaN	NaN	NaN	NaN	NaN	NaN	NaN	NaN	NaN	NaN	19.1832	19.3922	19.5136	19.4603	19.3813	19.2667	19.1625	19.1922	19.2779	19.3649	19.2234	20.4208	20.5107	20.6106	20.4823	20.4205	20.5623	20.6923	20.6129	20.3042	20.7112	20.5512
NFKBIL1	NF-kappa-B inhibitor-like protein 1	150	GETPGQILGWGPPWDSAEEEEEDDASKEREW	DGETPGQILGWGPPWDS(1)AEEEEEDDASK	1	NaN	NaN	NaN	NaN	NaN	NaN	NaN	NaN	NaN	NaN	NaN	18.6127	18.5659	18.7157	18.8611	18.9607	18.4879	19.2544	18.9461	19.2302	19.1081	19.1778	17.3509	17.0714	17.3356	17.4722	17.494	17.5016	17.1917	17.5171	17.2492	17.3222	17.4853	18.2863	18.1171	18.4804	18.3081	18.2451	18.4012	18.2676	18.421	18.4021	18.1303	18.7869
ABI1	Abl interactor 1	290	GSQYGTMTRQISRHNSTTSSTSSGGYRRTPS	HNS(0.967)T(0.025)T(0.005)S(0.001)S(0.001)T(0.001)SSGGYRR	1;2	18.0537	18.3473	18.1666	16.8203	17.7524	17.8831	17.2326	17.359	17.1895	17.2159	16.9527	18.4037	18.603	18.6386	18.101	18.4383	18.5494	18.19	18.2754	18.2857	18.2848	18.2197	19.0918	19.3969	17.6163	18.2682	18.9373	19.069	17.8364	18.326	17.4402	17.443	17.5327	16.356	16.3841	15.2387	15.2699	15.8122	15.8573	15.1568	15.4658	14.704	14.8997	15.0269
ABI1	Abl interactor 1	217	PTVPNDYMTSPARLGSQHSPGRTASLNQRPR	LGS(0.944)QHS(0.056)PGR	1;2	NaN	NaN	NaN	NaN	NaN	NaN	NaN	NaN	NaN	NaN	NaN	14.0901	14.9838	14.9275	14.3028	14.7424	14.8311	14.592	14.7526	14.6225	14.6499	15.0376	NaN	NaN	NaN	NaN	NaN	NaN	NaN	NaN	NaN	NaN	NaN	NaN	NaN	NaN	NaN	NaN	NaN	NaN	NaN	NaN	NaN	NaN
ABI1	Abl interactor 1	220	PNDYMTSPARLGSQHSPGRTASLNQRPRTHS	LGSQHS(1)PGR	1;2	20.7782	21.3771	21.2376	21.0634	21.1434	21.063	20.9746	21.0654	21.1296	20.949	21.1584	22.0189	22.7332	22.5799	22.3702	22.3783	22.4281	22.3158	22.3572	22.4073	22.1643	22.5245	20.7264	21.0255	20.6838	20.7934	20.7674	20.802	20.7237	20.936	20.4216	20.6673	20.6048	21.7485	22.0166	21.7497	21.8273	21.8075	21.8826	21.9725	22.106	21.4653	21.6305	21.6622
ABI1	Abl interactor 1	226	SPARLGSQHSPGRTASLNQRPRTHSGSSGGS	TAS(1)LNQRPR	1	20.7949	20.3712	20.6007	20.2731	20.7752	20.3668	20.5759	20.6476	20.494	20.6065	20.3878	19.6245	19.0377	19.3717	19.1431	19.6036	19.2048	19.3643	19.3897	19.2434	19.4648	19.0318	20.0912	20.0009	20.3002	19.6893	19.9009	20.1892	20.3585	19.8082	19.7985	20.1705	19.7797	20.6656	20.4753	20.8855	20.2993	20.6091	20.8547	20.9219	20.3706	20.3589	20.7295	20.4374
ABI1	Abl interactor 1	211	LEPVKPPTVPNDYMTSPARLGSQHSPGRTAS	TLEPVKPPTVPNDYMT(0.028)S(0.972)PAR	1;2	18.8224	19.7152	19.1555	19.2148	19.0767	19.1689	19.0482	18.8083	18.8327	18.9036	18.4796	21.0209	21.6784	21.2611	21.1788	21.1854	21.3284	21.0496	20.4632	21.0368	20.8194	20.6828	20.0115	20.149	19.9431	19.7585	19.5844	20.1718	20.2264	19.4527	19.4258	19.833	19.2773	20.8691	21.1171	20.7974	20.6502	20.4393	21.0307	21.1776	20.1946	20.3297	20.6738	20.0473
ABI1	Abl interactor 1	178	TGTLSRTNPPTQKPPSPPMSGRGTLGRNTPY	T(1)NPPT(1)QKPPS(1)PPMS(1)GR	1;4	23.409	23.572	23.6323	23.6565	23.6492	23.579	23.7212	23.6186	23.8116	23.5811	23.7282	23.3258	23.4795	23.4947	23.5232	23.3844	23.4665	23.5652	23.3801	23.6545	23.466	23.5692	23.1459	23.1605	23.1861	23.1636	23.1214	23.1823	23.1302	23.2453	23.0776	23.2327	23.223	23.4087	23.4171	23.5432	23.4733	23.4153	23.4626	23.4863	23.51	23.3354	23.4664	23.5163
ABI1	Abl interactor 1	182	SRTNPPTQKPPSPPMSGRGTLGRNTPYKTLE	T(1)NPPT(1)QKPPS(1)PPMS(1)GR	1;4	16.4724	16.5096	16.5392	16.5931	16.5301	16.6458	16.7116	16.4232	16.7526	16.4792	16.4883	NaN	NaN	NaN	NaN	NaN	NaN	NaN	NaN	NaN	NaN	NaN	16.7797	16.8532	16.9741	16.9534	16.7281	16.8096	16.6161	16.8209	16.6253	16.766	16.8812	NaN	NaN	NaN	NaN	NaN	NaN	NaN	NaN	NaN	NaN	NaN
MPP2	MAGUK p55 subfamily member 2	59	GAAELDLIFLRGIMESPIVRSLAKAHERLEE	GIMES(1)PIVR	1	19.4924	19.8151	19.3274	19.3532	19.3788	19.9616	19.9275	19.6052	19.8893	19.9018	19.6808	18.8641	19.2551	18.8426	18.9116	18.9934	19.5943	19.437	19.3897	19.6494	19.3793	19.281	19.9409	19.8717	19.5191	19.4613	19.2907	20.0572	20.1097	19.9288	19.8581	19.8927	19.6872	18.9645	18.9655	18.3832	18.5266	18.3274	19.1611	19.1854	19.0846	18.8239	18.996	18.7345
WRAP73	WD repeat-containing protein WRAP73	236	AINDPKIVVYKEAEKSPQLGLGCLSFPPPRA	S(1)PQLGLGCLSFPPPR	1	NaN	NaN	NaN	NaN	NaN	NaN	NaN	NaN	NaN	NaN	NaN	NaN	NaN	NaN	NaN	NaN	NaN	NaN	NaN	NaN	NaN	NaN	NaN	NaN	NaN	NaN	NaN	NaN	NaN	NaN	NaN	NaN	NaN	17.1632	17.0884	17.0951	17.0614	17.0205	17.2441	17.5045	17.3119	17.108	17.5612	17.1753
FAM219A	Protein FAM219A	86	DQSPDEKPLVALDTDSDDDFDMSRYSSSGYS	PLVALDT(1)DS(1)DDDFDMSR	1;2	NaN	NaN	NaN	NaN	NaN	NaN	NaN	NaN	NaN	NaN	NaN	18.5562	19.2001	19.3359	19.5716	19.3099	18.2152	18.8006	18.7277	18.8402	18.5203	18.7482	NaN	NaN	NaN	NaN	NaN	NaN	NaN	NaN	NaN	NaN	NaN	17.9612	19.0895	19.673	19.3065	19.1886	17.905	17.88	18.311	17.9277	17.5285	17.9689
FAM219A	Protein FAM219A	43	RELARKGSLKNGSMGSPVNQQPKKNNVMART	NGSMGS(1)PVNQQPK	1	19.0336	19.5502	19.3477	19.4648	19.3609	18.7719	18.9153	18.9951	19.142	18.8511	18.9992	18.9951	19.676	19.5705	19.7073	19.5917	19.0794	19.0175	19.0914	19.0841	18.7556	18.9762	17.4554	17.9048	18.0074	17.8871	17.4405	16.9581	17.317	17.1455	17.1274	17.2477	17.3768	18.4072	19.0395	19.0937	18.8393	18.6104	18.384	18.3327	18.2211	18.2157	18.0334	18.1745
NOL6	Nucleolar protein 6	289	VRSAWYRGQSPAGDGSPEPPTPRYNTWVLQD	GQSPAGDGS(1)PEPPTPR	1	17.5927	17.6812	17.6395	17.3719	17.2395	17.7106	17.676	17.6108	17.7162	17.727	17.4962	18.0517	18.5181	18.1939	18.4716	18.3105	17.8078	18.2512	17.829	17.9572	17.9902	18.0478	17.2093	17.4001	17.6137	17.377	17.1661	17.267	17.3982	17.1683	17.1173	17.4177	17.1525	18.8198	19.01	19.1971	19.1172	18.848	18.8614	19.2341	18.9458	18.7196	18.9583	18.7594
APTX	Aprataxin	30	EAKNPGLETHRKRKRSGNSDSIERDAAQEAE	S(0.841)GNS(0.158)DS(0.001)IERDAAQEAEAGTGLEPGSNSGQCSVPLK	1	NaN	NaN	NaN	NaN	NaN	NaN	NaN	NaN	NaN	NaN	NaN	17.3788	17.2125	17.6889	17.2234	17.4876	16.8723	18.0894	17.709	17.5758	17.7404	17.9081	NaN	NaN	NaN	NaN	NaN	NaN	NaN	NaN	NaN	NaN	NaN	NaN	NaN	NaN	NaN	NaN	NaN	NaN	NaN	NaN	NaN	NaN
APTX	Aprataxin	54	DAAQEAEAGTGLEPGSNSGQCSVPLKKGKDA	S(0.141)GNS(0.033)DS(0.041)IERDAAQEAEAGT(0.144)GLEPGS(0.608)NS(0.032)GQCS(0.001)VPLK	1	NaN	NaN	NaN	NaN	NaN	NaN	NaN	NaN	NaN	NaN	NaN	NaN	NaN	NaN	NaN	NaN	NaN	NaN	NaN	NaN	NaN	NaN	18.1902	17.7876	18.1671	17.8906	17.9133	18.2014	18.3469	18.7596	18.0581	18.3384	18.0771	NaN	NaN	NaN	NaN	NaN	NaN	NaN	NaN	NaN	NaN	NaN
ELAVL2	ELAV-like protein;ELAV-like protein 2	250	PSQKTNQAILSQLYQSPNRRYPGPLAQQAQR	TNQAILSQLYQS(1)PNR	1	16.3339	16.9789	16.5702	16.9002	16.5348	16.749	16.8628	16.4747	16.8052	16.6563	16.608	18.8446	19.2431	18.8701	19.0531	18.8135	19.228	19.1248	18.6706	19.0076	18.93	18.6282	17.5828	17.9491	17.4324	17.4309	17.5089	17.7785	17.7646	17.5374	17.5471	17.7967	17.2853	18.1779	18.251	18.0089	18.0067	17.8086	18.4705	18.5244	17.7905	17.9085	18.6693	17.8914
NFIB	Nuclear factor 1 B-type;Nuclear factor 1	194	FLAYYVQEQDSGQSGSPSHNDPAKNPPGYLE	ELDLFLAYYVQEQDS(0.021)GQS(0.12)GS(0.707)PS(0.152)HNDPAK	1	17.0805	17.0885	17.041	17.0256	16.8153	16.6686	17.0027	17.0093	17.2756	16.8842	16.8139	NaN	NaN	NaN	NaN	NaN	NaN	NaN	NaN	NaN	NaN	NaN	NaN	NaN	NaN	NaN	NaN	NaN	NaN	NaN	NaN	NaN	NaN	NaN	NaN	NaN	NaN	NaN	NaN	NaN	NaN	NaN	NaN	NaN
NFIB	Nuclear factor 1 B-type;Nuclear factor 1	410	PQDTLKNYVPSYDPSSPQTSQSWYLG_____	NYVPSYDPS(0.019)S(0.975)PQT(0.005)S(0.001)QSWYLG	1	NaN	NaN	NaN	NaN	NaN	NaN	NaN	NaN	NaN	NaN	NaN	18.328	18.4235	18.4986	18.3807	18.4	18.6809	18.4144	18.214	18.6157	18.2832	18.2874	NaN	NaN	NaN	NaN	NaN	NaN	NaN	NaN	NaN	NaN	NaN	18.2519	18.7133	18.5975	18.2565	18.5236	18.4626	18.3689	18.4127	18.3246	18.3488	18.2738
NFIB	Nuclear factor 1 B-type;Nuclear factor 1	328	PTTMKKPEKPLFSSASPQDSSPRLSTFPQHH	PLFSS(0.004)AS(0.994)PQDS(0.002)SPR	1	17.811	18.4871	18.3478	18.1984	18.5105	18.4365	18.418	18.3208	18.7146	18.3265	18.3202	16.9698	17.544	17.66	17.3595	17.5651	17.4668	17.3801	17.1086	17.6262	17.3365	17.1911	NaN	NaN	NaN	NaN	NaN	NaN	NaN	NaN	NaN	NaN	NaN	NaN	NaN	NaN	NaN	NaN	NaN	NaN	NaN	NaN	NaN	NaN
NFIB	Nuclear factor 1 B-type;Nuclear factor 1	332	KKPEKPLFSSASPQDSSPRLSTFPQHHHPGI	PLFS(0.006)S(0.004)AS(0.141)PQDS(0.831)S(0.019)PR	1;2	NaN	NaN	NaN	NaN	NaN	NaN	NaN	NaN	NaN	NaN	NaN	NaN	NaN	NaN	NaN	NaN	NaN	NaN	NaN	NaN	NaN	NaN	16.7974	17.1986	17.2646	16.9719	17.1717	16.9987	17.3986	17.231	16.9983	16.9231	17.1036	NaN	NaN	NaN	NaN	NaN	NaN	NaN	NaN	NaN	NaN	NaN
NFIB	Nuclear factor 1 B-type;Nuclear factor 1	333	KPEKPLFSSASPQDSSPRLSTFPQHHHPGIP	PLFS(0.012)S(0.006)AS(0.369)PQDS(0.62)S(0.992)PR	1;2	NaN	NaN	NaN	NaN	NaN	NaN	NaN	NaN	NaN	NaN	NaN	NaN	NaN	NaN	NaN	NaN	NaN	NaN	NaN	NaN	NaN	NaN	NaN	NaN	NaN	NaN	NaN	NaN	NaN	NaN	NaN	NaN	NaN	19.0517	19.4789	19.6925	19.6864	19.6779	19.4022	19.6198	19.5966	19.3445	19.2447	19.3693
NFIB	Nuclear factor 1 B-type;Nuclear factor 1	264	YYHDMNSGVNLQRSLSSPPSSKRPKTISIDE	SLS(0.991)S(0.009)PPSSK	1;2	NaN	NaN	NaN	NaN	NaN	NaN	NaN	NaN	NaN	NaN	NaN	NaN	NaN	NaN	NaN	NaN	NaN	NaN	NaN	NaN	NaN	NaN	16.3234	16.4726	16.5426	16.455	16.6056	16.4624	16.6964	16.5653	16.2365	16.7382	16.3035	20.4953	20.7014	20.6568	20.6082	20.6516	20.8081	20.8066	20.7296	20.5528	20.9311	20.5923
NFIB	Nuclear factor 1 B-type;Nuclear factor 1	265	YHDMNSGVNLQRSLSSPPSSKRPKTISIDEN	SLSS(0.999)PPSSK	1;2	20.9927	21.4086	21.3581	21.2614	21.1623	21.2132	21.2371	20.845	21.2696	21.0097	20.9384	22.7239	23.1707	23.0058	22.9681	23.0271	23.0086	22.8952	22.6906	22.996	22.7587	22.7583	21.1053	21.3358	21.2364	21.0767	21.0697	21.1533	21.0275	20.9649	20.9153	20.9524	20.9391	22.4541	22.7227	22.5584	22.4704	22.4091	22.4979	22.3542	22.369	22.2839	22.3614	22.2998
NFIB	Nuclear factor 1 B-type;Nuclear factor 1	295	NMEPSPTGDFYPSPSSPAAGSRTWHERDQDM	TISIDENMEPS(0.949)PT(0.051)GDFYPS(0.001)PS(0.061)S(0.938)PAAGSR	1;2;3	NaN	NaN	NaN	NaN	NaN	NaN	NaN	NaN	NaN	NaN	NaN	NaN	NaN	NaN	NaN	NaN	NaN	NaN	NaN	NaN	NaN	NaN	17.0585	17.3477	17.235	17.3466	17.4622	17.2385	17.0705	17.5595	17.2091	17.7375	17.1905	NaN	NaN	NaN	NaN	NaN	NaN	NaN	NaN	NaN	NaN	NaN
NFIB	Nuclear factor 1 B-type;Nuclear factor 1	311	PAAGSRTWHERDQDMSSPTTMKKPEKPLFSS	TWHERDQDMS(0.546)S(0.416)PT(0.035)T(0.003)MK	1	NaN	NaN	NaN	NaN	NaN	NaN	NaN	NaN	NaN	NaN	NaN	NaN	NaN	NaN	NaN	NaN	NaN	NaN	NaN	NaN	NaN	NaN	NaN	NaN	NaN	NaN	NaN	NaN	NaN	NaN	NaN	NaN	NaN	19.9882	20.3346	20.1272	20.2082	20.0348	20.0179	20.1685	20.0679	19.9391	20.44	19.9627
NFIB	Nuclear factor 1 B-type;Nuclear factor 1	312	AAGSRTWHERDQDMSSPTTMKKPEKPLFSSA	TWHERDQDMS(0.109)S(0.891)PTTMK	1	19.4749	19.7563	19.5953	19.5911	19.5906	19.6448	19.4191	19.1433	19.5223	19.3836	19.3888	20.6892	20.956	20.6469	20.766	20.8609	21.1111	20.8418	20.5952	20.8355	20.5524	20.6066	19.8982	19.9682	19.9777	20.0091	19.7505	19.983	19.6839	19.8384	19.7279	19.8978	19.7433	NaN	NaN	NaN	NaN	NaN	NaN	NaN	NaN	NaN	NaN	NaN
TBC1D22A	TBC1 domain family member 22A	132	GPGLQQKPRPEAEPPSPPSGDLRLVKSVSES	PRPEAEPPS(1)PPSGDLR	1	19.6247	20.0497	19.7751	19.7343	19.8471	19.4694	19.8584	19.8589	19.9599	19.7514	19.8381	20.0042	20.5615	20.3335	20.2138	20.5351	19.6869	20.6924	20.4874	20.8592	20.2688	20.5781	18.7007	19.6931	19.5299	19.2939	19.3883	19.0775	19.2158	19.3479	19.3075	18.9448	18.9603	19.4659	20.1269	19.9513	19.9624	20.1972	20.0103	19.9267	20.0254	20.0282	19.5126	19.969
TBC1D22A	TBC1 domain family member 22A	165	SCPAESASDAAPLQRSQSLPHSATVTLGGTS	S(0.572)QS(0.415)LPHS(0.007)AT(0.005)VTLGGTSDPSTLSSSALSEREASRLDK	1	NaN	NaN	NaN	NaN	NaN	NaN	NaN	NaN	NaN	NaN	NaN	18.3557	18.1418	18.317	18.1238	18.1639	18.1359	17.815	17.8276	18.0549	17.8745	17.5664	NaN	NaN	NaN	NaN	NaN	NaN	NaN	NaN	NaN	NaN	NaN	NaN	NaN	NaN	NaN	NaN	NaN	NaN	NaN	NaN	NaN	NaN
TBC1D22A	TBC1 domain family member 22A	167	PAESASDAAPLQRSQSLPHSATVTLGGTSDP	S(0.16)QS(0.834)LPHS(0.006)ATVTLGGTSDPSTLSSSALSEREASRLDK	1	NaN	NaN	NaN	NaN	NaN	NaN	NaN	NaN	NaN	NaN	NaN	18.3557	18.1418	18.317	18.1238	18.1639	18.1359	17.815	17.8276	18.0549	17.8745	17.5664	15.9195	16.1814	16.1705	15.9212	16.4412	15.8778	15.5298	16.0466	15.8309	15.8455	15.8661	NaN	NaN	NaN	NaN	NaN	NaN	NaN	NaN	NaN	NaN	NaN
TBC1D22A	TBC1 domain family member 22A	171	ASDAAPLQRSQSLPHSATVTLGGTSDPSTLS	S(0.003)QS(0.016)LPHS(0.979)AT(0.002)VTLGGTSDPSTLSSSALSEREASRLDK	1	NaN	NaN	NaN	NaN	NaN	NaN	NaN	NaN	NaN	NaN	NaN	NaN	NaN	NaN	NaN	NaN	NaN	NaN	NaN	NaN	NaN	NaN	16.1626	16.4219	16.1187	16.1312	16.3328	16.195	15.9717	16.1189	15.8834	16.0881	15.9907	NaN	NaN	NaN	NaN	NaN	NaN	NaN	NaN	NaN	NaN	NaN
ZMYND11	Zinc finger MYND domain-containing protein 11	301	PKKEEPEPETEAVSSSQEIPTMPQPIEKVSV	KEEPEPETEAVS(0.014)S(0.099)S(0.887)QEIPTMPQPIEK	1	NaN	NaN	NaN	NaN	NaN	NaN	NaN	NaN	NaN	NaN	NaN	NaN	NaN	NaN	NaN	NaN	NaN	NaN	NaN	NaN	NaN	NaN	NaN	NaN	NaN	NaN	NaN	NaN	NaN	NaN	NaN	NaN	NaN	17.8123	17.5171	17.7051	17.7474	17.6096	18.0799	17.5623	17.9914	17.8593	17.8404	17.92
ZMYND11	Zinc finger MYND domain-containing protein 11	324	QPIEKVSVSTQTKKLSASSPRMLHRSTQTTN	KLS(0.998)AS(0.002)S(0.001)PR	1;2	18.8755	18.797	18.6692	19.0197	18.7949	19.2212	19.3523	19.2248	19.6929	19.4354	19.3198	18.9005	19.0996	18.9826	19.1181	19.0683	19.2988	19.5162	19.2509	19.6421	19.4678	19.2802	17.5356	17.3665	17.4909	17.4615	17.2933	17.8309	17.8748	18.2043	17.9456	18.1556	17.9032	17.7591	17.8814	17.7852	17.9213	17.4833	18.3034	18.0983	18.2402	18.1168	18.5417	18.0148
ZMYND11	Zinc finger MYND domain-containing protein 11	327	EKVSVSTQTKKLSASSPRMLHRSTQTTNDGV	KLSAS(0.004)S(0.996)PR	1;2	20.0455	20.1017	20	20.0976	20.1148	20.3394	20.3305	20.0834	20.3782	20.2339	20.0278	21.1777	21.2734	21.0643	21.1249	21.1774	21.5407	21.5022	21.0409	21.4889	21.4127	21.1928	20.0155	19.9816	19.922	19.8727	19.7752	20.1	20.2174	19.8497	19.8704	20.4908	19.8958	20.8949	20.8545	20.9215	20.6904	20.7656	21.0902	21.2855	20.8832	20.8857	21.4561	20.8601
UNKL	Putative E3 ubiquitin-protein ligase UNKL	15	_MPSVSKAAAAALSGSPPQTEKPTHYRYLKE	AAAAALS(0.001)GS(0.998)PPQTEKPTHYR	1	NaN	NaN	NaN	NaN	NaN	NaN	NaN	NaN	NaN	NaN	NaN	18.889	19.2316	19.1541	19.2424	19.2333	19.3489	19.0506	18.7726	19.0922	18.9269	18.9513	18.0546	18.2472	18.1261	17.8187	17.7987	18.1996	18.1995	17.8513	17.6376	17.9204	17.6966	NaN	NaN	NaN	NaN	NaN	NaN	NaN	NaN	NaN	NaN	NaN
MFF	Mitochondrial fission factor	79	QNEEIRAVGRLKRERSMSENAVRQNGQLVRN	RERS(0.999)MS(0.001)ENAVR	1	19.7112	20.1	19.6569	19.5361	19.6545	17.7835	19.6195	19.8484	19.6453	19.7962	19.6686	NaN	NaN	NaN	NaN	NaN	NaN	NaN	NaN	NaN	NaN	NaN	19.7183	20.1971	20.0851	19.8678	19.6868	19.9501	19.6601	20.0638	19.749	19.4995	19.9596	14.248	14.0022	14.3539	13.5474	13.56	13.913	13.753	14.0233	13.6818	13.8536	13.649
MFF	Mitochondrial fission factor	81	EEIRAVGRLKRERSMSENAVRQNGQLVRNDS	S(0.002)MS(0.998)ENAVR	1	NaN	NaN	NaN	NaN	NaN	NaN	NaN	NaN	NaN	NaN	NaN	21.1659	21.7969	21.3008	21.3388	21.5451	20.5048	21.2846	21.8205	21.461	21.2174	21.2509	22.1141	22.6812	22.8829	22.1704	22.0452	22.1565	22.5898	22.2506	22.1792	22.2569	22.2683	21.6689	22.0455	22.6046	21.9141	21.7162	21.7314	22.0476	22.0308	21.655	21.7082	22.0902
CASP8		91	EEFSKGEELCGVMTISDSPREQDSESQTLDK	GEELCGVMT(0.003)IS(0.573)DS(0.424)PREQDSESQTLDK	1	NaN	NaN	NaN	NaN	NaN	NaN	NaN	NaN	NaN	NaN	NaN	NaN	NaN	NaN	NaN	NaN	NaN	NaN	NaN	NaN	NaN	NaN	17.0588	17.166	16.9136	16.8259	16.759	16.976	16.8318	16.7558	16.9665	16.7261	16.7353	NaN	NaN	NaN	NaN	NaN	NaN	NaN	NaN	NaN	NaN	NaN
CASP8		93	FSKGEELCGVMTISDSPREQDSESQTLDKVY	GEELCGVMTISDS(1)PREQDSESQTLDK	1	16.2897	16.6341	16.4908	16.174	16.2755	15.668	16.4292	16.3009	16.3533	16.6042	16.2177	18.168	18.4641	18.0181	18.16	18.0428	17.74	18.6386	17.7958	18.3544	18.4572	18.0475	17.0473	17.0655	17.1148	16.8582	16.7295	17.1805	17.0486	16.7642	16.766	16.7412	16.5405	20.3438	20.606	20.2765	20.0021	19.8744	20.3969	20.1727	19.9594	19.906	19.9285	19.783
LRRC20	Leucine-rich repeat-containing protein 20	106	VRVIAPPLIKFDMLMSPEGARAPLP______	FDMLMS(1)PEGARAPLP	1	16.7141	17.256	16.8308	16.9237	16.5907	17.4003	17.0725	16.1612	16.6514	17.0599	16.0988	17.1244	17.7876	17.4293	17.2671	17.0476	17.669	17.5414	16.4289	16.9099	17.61	16.6655	NaN	NaN	NaN	NaN	NaN	NaN	NaN	NaN	NaN	NaN	NaN	17.4259	17.8098	17.2152	17.2673	16.835	17.7932	17.502	16.5223	16.819	17.647	16.356
SRCAP	Helicase SRCAP	2889	TEKLPRKRAGAPVGGSPGLAKRGRLQPPSPL	RAGAPVGGS(1)PGLAK	1	16.0722	16.3709	16.0601	16.1432	16.003	14.71	16.1458	15.9511	15.951	15.7565	15.9857	19.7163	20.0184	19.8315	20.0313	19.8489	19.66	19.9024	19.7283	20.1026	19.8917	19.7449	17.5314	17.5555	17.7349	17.4175	17.0518	17.3846	17.4977	17.3714	17.4812	17.567	17.3218	19.8843	19.9869	19.798	19.8245	19.7847	19.7924	19.6463	19.3632	19.7191	19.6647	19.6159
SRCAP	Helicase SRCAP	2528	GAASTLVPGVSETSASPGSPSVRSMSGPESS	GAASTLVPGVSET(0.006)S(0.031)AS(0.933)PGS(0.029)PS(0.001)VR	1	17.2073	17.7675	17.7367	17.849	17.7017	17.5128	17.473	17.2843	17.6529	17.3606	17.4108	NaN	NaN	NaN	NaN	NaN	NaN	NaN	NaN	NaN	NaN	NaN	NaN	NaN	NaN	NaN	NaN	NaN	NaN	NaN	NaN	NaN	NaN	NaN	NaN	NaN	NaN	NaN	NaN	NaN	NaN	NaN	NaN	NaN
SRCAP	Helicase SRCAP	2531	STLVPGVSETSASPGSPSVRSMSGPESSPPI	GAASTLVPGVSETSAS(0.038)PGS(0.961)PSVR	1	NaN	NaN	NaN	NaN	NaN	NaN	NaN	NaN	NaN	NaN	NaN	19.0091	19.2672	19.1795	19.0701	19.3835	18.7489	18.9615	19.0043	19.0229	18.8188	18.6825	NaN	NaN	NaN	NaN	NaN	NaN	NaN	NaN	NaN	NaN	NaN	20.3039	20.4291	20.4956	20.1396	20.3389	19.9391	20.1953	20.0457	19.9356	20.1249	20.0173
SRCAP	Helicase SRCAP	2581	FIARRHIELGVTGGGSPENGDGALLAITPPA	HIELGVT(0.001)GGGS(0.999)PENGDGALLAITPPAVK	1;2	NaN	NaN	NaN	NaN	NaN	NaN	NaN	NaN	NaN	NaN	NaN	18.3229	18.5764	18.6108	18.4239	18.7265	18.5889	19.0042	18.2987	18.7153	18.589	18.6346	NaN	NaN	NaN	NaN	NaN	NaN	NaN	NaN	NaN	NaN	NaN	NaN	NaN	NaN	NaN	NaN	NaN	NaN	NaN	NaN	NaN	NaN
SRCAP	Helicase SRCAP	975	TAVPAPTPAPQRLILSPDMQARLPSGEVVSI	LILS(1)PDMQAR	1	NaN	NaN	NaN	NaN	NaN	NaN	NaN	NaN	NaN	NaN	NaN	18.4348	18.5552	18.4934	18.4044	17.9731	18.1242	18.3317	17.9517	18.2997	18.5146	18.2818	NaN	NaN	NaN	NaN	NaN	NaN	NaN	NaN	NaN	NaN	NaN	NaN	NaN	NaN	NaN	NaN	NaN	NaN	NaN	NaN	NaN	NaN
SRCAP	Helicase SRCAP	2757	SPPKRKRGRPPKNPPSPRPSQLPVLDRDSTS	NPPS(1)PRPSQLPVLDRDSTSVLESCGLGR	1	18.5889	18.5813	18.1941	18.3195	18.5227	18.4653	18.4172	18.5358	18.6465	18.5035	18.4442	19.0047	18.9544	18.9146	18.989	19.0519	18.7834	18.7474	18.9288	19.0144	18.8513	18.7544	18.3708	18.4525	18.4335	18.2102	18.2882	18.2537	18.3423	18.3751	18.1844	18.5053	18.2687	18.8925	18.9478	18.9241	18.9273	18.8667	18.8187	19.0246	19.061	18.7383	18.99	18.9139
SRCAP	Helicase SRCAP	2610	PAVKRRRGRPPKKNRSPADAGRGVDEAPSST	NRS(1)PADAGRGVDEAPSSTLK	1	20.782	20.4283	20.3526	20.6776	20.6663	20.7471	21.1166	21.0672	21.2479	21.0992	21.0354	21.9098	21.4524	21.3996	21.5569	21.7168	22.0504	22.11	22.1836	22.3671	22.0958	22.1181	20.8102	20.3416	20.3274	20.5845	20.4786	20.8987	20.7748	20.9829	20.6992	20.9258	20.8614	22.6203	22.4204	22.5968	22.5018	22.2827	22.4691	22.3654	22.4647	22.3674	22.5135	22.6446
SRCAP	Helicase SRCAP	2466	SPEGPSPARPPRRRTSADVEIRGQGTGRPGQ	RRT(0.5)S(0.5)ADVEIR	1	19.6759	19.0056	19.5358	19.3114	19.3361	18.7532	19.1417	18.882	19.023	18.9917	18.9043	20.3043	19.6043	20.0054	19.7666	19.9	19.6947	19.7663	19.3634	19.653	19.7344	19.4048	NaN	NaN	NaN	NaN	NaN	NaN	NaN	NaN	NaN	NaN	NaN	NaN	NaN	NaN	NaN	NaN	NaN	NaN	NaN	NaN	NaN	NaN
SRCAP	Helicase SRCAP	1600	SKDEPDTLTLRSGPPSPPSTATSFGGPRPRR	SGPPS(1)PPSTATSFGGPRPR	1	19.1133	19.1165	19.2101	19.0178	19.2192	19.4075	19.1576	19.0858	19.3489	19.2649	19.0259	19.3327	19.5579	19.4628	19.6578	19.5318	19.405	19.4117	18.9816	19.4925	19.4061	19.1771	19.1332	19.1341	19.2123	19.0471	19.0847	19.2122	19.2186	19.3085	19.0946	19.6696	18.9928	20.3384	20.3675	20.6255	20.4774	20.4652	20.3928	20.3733	20.447	20.2076	20.3953	20.309
SRCAP	Helicase SRCAP	2171	ISAHQTRSTTTPPRCSPARERVPRPAPRPRP	S(0.055)T(0.063)T(0.407)T(0.475)PPRCS(1)PARER	1;2	18.2599	18.3031	18.3409	18.1692	18.2734	18.1375	18.1739	18.097	18.2029	18.1514	18.1755	17.9557	17.7845	18.1463	18.0067	18.0225	17.8181	17.7387	17.9809	17.7605	17.9566	18.0003	18.2032	18.1266	18.1536	18.15	18.088	18.0491	18.0001	18.1898	17.8445	18.3508	18.0605	17.9524	17.9384	18.2754	18.154	18.1418	17.9894	17.888	18.1267	17.9515	18.0802	17.9149
LPIN1	Phosphatidate phosphatase LPIN1	336	PQAAKSSSPHKMKESSPLSSRKICDKSHFQA	ES(0.008)S(0.948)PLS(0.033)S(0.01)RK	1;2	NaN	NaN	NaN	NaN	NaN	NaN	NaN	NaN	NaN	NaN	NaN	16.6437	17.3475	17.3458	17.3403	17.1421	15.4249	16.6782	16.9387	16.9598	16.9614	16.9945	NaN	NaN	NaN	NaN	NaN	NaN	NaN	NaN	NaN	NaN	NaN	17.289	17.577	17.6681	17.6835	17.535	17.3961	17.3602	17.1518	17.0185	17.1217	17.2813
LPIN1	Phosphatidate phosphatase LPIN1	112	ETDNDQEVIPMHLATSPILSEGASRMECQLK	LGDNGEAFFVQET(0.015)DNDQEVIPMHLAT(0.214)S(0.758)PILS(0.012)EGAS(0.001)R	1	17.1433	17.6106	17.2737	17.6591	17.4309	17.7695	17.4657	17.286	17.8034	17.5735	17.6947	15.0739	15.7966	16.6601	15.9174	15.6899	16.0993	14.0064	16.0615	15.7264	14.8815	15.7346	17.1001	17.2023	17.74	17.5056	17.7388	17.3461	16.9373	17.5525	16.7361	17.141	17.129	NaN	13.7272	NaN	NaN	14.2695	NaN	13.0624	13.876	13.9087	NaN	NaN
LPIN1	Phosphatidate phosphatase LPIN1	168	SSSSVVKKRRKRRRKSQLDSLKRDDNMNTSE	S(1)QLDSLK	1	18.6909	19.0738	18.9304	18.7312	18.6434	17.8273	18.43	18.5384	18.4091	18.4881	18.653	19.116	19.4824	19.6506	19.593	19.5052	17.4457	18.9254	19.0731	18.9769	18.9353	19.1697	NaN	NaN	NaN	NaN	NaN	NaN	NaN	NaN	NaN	NaN	NaN	NaN	NaN	NaN	NaN	NaN	NaN	NaN	NaN	NaN	NaN	NaN
LPIN1	Phosphatidate phosphatase LPIN1	422	KPPSASVVQTANKTDSPSRKRDKRSRHLGAD	T(0.186)DS(0.802)PS(0.011)RK	1	19.4698	19.7697	19.9887	19.8384	19.8271	16.9729	19.2821	19.2974	19.4507	19.3589	19.415	NaN	NaN	NaN	NaN	NaN	NaN	NaN	NaN	NaN	NaN	NaN	NaN	NaN	NaN	NaN	NaN	NaN	NaN	NaN	NaN	NaN	NaN	NaN	NaN	NaN	NaN	NaN	NaN	NaN	NaN	NaN	NaN	NaN
GAS7	Growth arrest-specific protein 7	98	MSVRKSTGDSQNLGSSSPSKKQSK_______	STGDSQNLGS(0.076)S(0.747)S(0.175)PS(0.002)K	1	NaN	NaN	NaN	NaN	NaN	NaN	NaN	NaN	NaN	NaN	NaN	NaN	NaN	NaN	NaN	NaN	NaN	NaN	NaN	NaN	NaN	NaN	NaN	NaN	NaN	NaN	NaN	NaN	NaN	NaN	NaN	NaN	NaN	NaN	NaN	NaN	NaN	NaN	NaN	NaN	NaN	NaN	NaN	NaN
GAS7	Growth arrest-specific protein 7	99	SVRKSTGDSQNLGSSSPSKKQSK________	STGDSQNLGS(0.002)S(0.063)S(0.933)PS(0.001)K	1	NaN	NaN	NaN	NaN	NaN	NaN	NaN	NaN	NaN	NaN	NaN	NaN	NaN	NaN	NaN	NaN	NaN	NaN	NaN	NaN	NaN	NaN	NaN	NaN	NaN	NaN	NaN	NaN	NaN	NaN	NaN	NaN	NaN	18.7079	19.3263	19.4585	19.2071	19.1511	19.0566	18.711	18.7158	18.4947	18.5399	18.6523
NDRG2	Protein NDRG2	245	MASSCMTRLSRSRTASLTSAASVDGNRSRSR	S(0.386)RT(0.615)AS(0.999)LTSAASVDGNR	1;2	NaN	NaN	NaN	NaN	NaN	NaN	NaN	NaN	NaN	NaN	NaN	21.0684	21.2241	21.2581	21.5271	21.4262	21.4347	21.3326	21.5125	21.2166	21.2164	21.0825	NaN	NaN	NaN	NaN	NaN	NaN	NaN	NaN	NaN	NaN	NaN	20.3214	20.4956	20.5928	20.517	20.4239	20.4038	20.7355	20.656	20.0778	20.6479	20.3778
NDRG2	Protein NDRG2	251	TRLSRSRTASLTSAASVDGNRSRSRTLSQSS	TASLTSAAS(1)VDGNR	1;2;3	19.1042	19.2687	19.3916	19.3738	19.1965	19.7463	19.4785	19.319	19.3347	19.4369	19.4163	20.2765	19.9317	20.4045	20.3581	20.2586	20.7278	20.4664	20.4908	20.3946	20.6278	20.4098	17.5525	17.7533	17.7593	17.7093	18.0173	17.9387	18.0957	18.0358	17.6524	18.0863	17.8811	18.3333	18.1298	18.2108	18.2052	17.9963	18.5231	18.6098	18.6183	18.2473	18.5454	18.3063
NDRG2	Protein NDRG2	263	SAASVDGNRSRSRTLSQSSESGTLSSGPPGH	S(0.439)RT(0.571)LS(0.98)QS(0.056)S(0.861)ES(0.049)GT(0.044)LSSGPPGHTMEVSC	1;2;3	NaN	NaN	NaN	NaN	NaN	NaN	NaN	NaN	NaN	NaN	NaN	NaN	NaN	NaN	NaN	NaN	NaN	NaN	NaN	NaN	NaN	NaN	NaN	NaN	NaN	NaN	NaN	NaN	NaN	NaN	NaN	NaN	NaN	17.4273	18.1791	17.6179	17.6515	17.9196	17.5728	16.6455	17.6075	16.5859	16.9474	17.0321
ABCC1	Multidrug resistance-associated protein 1	614	SSSSSYSGDISRHHNSTAELQKAEAKKEETW	HHNS(0.982)T(0.018)AELQK	1	NaN	NaN	NaN	NaN	NaN	NaN	NaN	NaN	NaN	NaN	NaN	NaN	NaN	NaN	NaN	NaN	NaN	NaN	NaN	NaN	NaN	NaN	18.5841	17.9859	18.561	18.5247	17.9767	18.2094	19.0293	18.888	18.5431	18.5469	18.8752	NaN	NaN	NaN	NaN	NaN	NaN	NaN	NaN	NaN	NaN	NaN
ABCC1	Multidrug resistance-associated protein 1	599	MLVTDSAGKQLQRQLSSSSSYSGDISRHHNS	QLS(0.979)S(0.02)S(0.001)SSYSGDISR	1	NaN	NaN	NaN	NaN	NaN	NaN	NaN	NaN	NaN	NaN	NaN	18.3354	18.4465	18.7866	18.723	18.5263	19.0121	18.4542	18.5163	18.969	18.867	18.6666	NaN	NaN	NaN	NaN	NaN	NaN	NaN	NaN	NaN	NaN	NaN	NaN	NaN	NaN	NaN	NaN	NaN	NaN	NaN	NaN	NaN	NaN
ABCC1	Multidrug resistance-associated protein 1	602	TDSAGKQLQRQLSSSSSYSGDISRHHNSTAE	QLSSS(0.001)S(0.742)S(0.256)YS(0.001)GDISR	1	NaN	NaN	NaN	NaN	NaN	NaN	NaN	NaN	NaN	NaN	NaN	18.2053	18.8006	18.5329	18.8134	18.8148	18.8412	18.7488	18.5317	18.8148	18.8483	18.6783	17.8933	17.9005	18.2331	17.9154	17.7487	17.6462	18.0393	18.0879	17.8116	18.0931	17.9285	NaN	NaN	NaN	NaN	NaN	NaN	NaN	NaN	NaN	NaN	NaN
PVR	Poliovirus receptor	8	________XCKVEHESFEKPQLLTVNLTVYY	VEHES(1)FEK	1	17.4397	17.5603	17.4911	17.5488	17.4487	18.7904	17.6446	17.2375	17.5094	17.6831	17.4675	NaN	NaN	NaN	NaN	NaN	NaN	NaN	NaN	NaN	NaN	NaN	17.7008	17.8205	17.7141	17.7639	17.7254	17.7377	17.5356	17.6906	17.8155	17.8297	17.611	NaN	NaN	NaN	NaN	NaN	NaN	NaN	NaN	NaN	NaN	NaN
ADCY3	Adenylate cyclase type 3	281	GSALPNGAPASSKSSSPALIETKEPNGSAHS	S(0.001)S(0.004)S(0.995)PALIETK	1	18.0832	18.2199	17.9977	17.973	18.0161	17.6751	18.4293	18.1508	18.2305	18.207	17.9679	19.7295	19.8142	19.3536	19.4451	19.5803	19.2375	19.9509	19.8735	20.0841	19.9459	19.4382	19.2624	19.1333	19.2207	18.8306	18.5994	19.2435	19.2668	18.7926	19.0256	18.5842	18.7646	20.1289	20.211	20.1588	20.0263	19.8228	20.1477	20.3041	19.749	19.9969	19.7099	19.6542
PTPRN2	Protein-tyrosine-phosphatase;Receptor-type tyrosine-protein phosphatase N2	139	DLLPRTLGQLQPDELSPKVDSGVDRHHLMAA	EDLLPRT(0.001)LGQLQPDELS(0.999)PK	1	NaN	NaN	NaN	NaN	NaN	NaN	NaN	NaN	NaN	NaN	NaN	NaN	NaN	NaN	NaN	NaN	NaN	NaN	NaN	NaN	NaN	NaN	NaN	NaN	NaN	NaN	NaN	NaN	NaN	NaN	NaN	NaN	NaN	18.7779	18.6576	18.9475	18.5808	18.4614	18.8798	18.9678	18.5528	18.7141	18.8498	19.0059
HADH	Hydroxyacyl-coenzyme A dehydrogenase, mitochondrial	13	___MAFVTRQFMRSVSSSSTASASAKKIIVK	SVS(0.977)S(0.022)S(0.001)STASASAK	1	NaN	NaN	NaN	NaN	NaN	NaN	NaN	NaN	NaN	NaN	NaN	NaN	NaN	NaN	NaN	NaN	NaN	NaN	NaN	NaN	NaN	NaN	NaN	NaN	NaN	NaN	NaN	NaN	NaN	NaN	NaN	NaN	NaN	16.8622	17.1696	17.2941	16.7632	17.1614	16.8976	16.4748	16.3757	16.3705	16.8155	16.4745
WIPF3	WAS/WASL-interacting protein family member 3	281	LLPPCGYPGLKAEPASPAQDAQEPPAPPPPL	AEPAS(0.999)PAQDAQEPPAPPPPLPPY(0.001)ASCSPR	1	NaN	NaN	NaN	NaN	NaN	NaN	NaN	NaN	NaN	NaN	NaN	NaN	NaN	NaN	NaN	NaN	NaN	NaN	NaN	NaN	NaN	NaN	NaN	NaN	NaN	NaN	NaN	NaN	NaN	NaN	NaN	NaN	NaN	NaN	NaN	NaN	NaN	NaN	NaN	NaN	NaN	NaN	NaN	NaN
WIPF3	WAS/WASL-interacting protein family member 3	132	VAGGKTGQGPGSRAPSPRLPNKTISGPLIPP	APS(1)PRLPNK	1	19.21	19.1937	19.2901	19.2563	19.2173	19.0747	19.2277	19.2184	19.1505	19.3739	19.3201	20.4668	20.7336	20.8954	20.8828	20.7207	20.4218	20.8743	20.7394	20.7539	20.8249	20.8831	19.4095	19.6054	19.7559	19.5619	19.5562	19.7101	19.5982	19.6947	19.3539	19.7844	19.6296	20.5114	20.6066	20.9991	20.8178	20.6907	20.7238	20.7182	20.8029	20.5063	20.8365	20.8038
WIPF3	WAS/WASL-interacting protein family member 3	330	GVNSSSETPPPLPPKSPSFQAPPQKAGAQAL	S(0.997)PS(0.003)FQAPPQK	1	18.1586	17.9476	17.7446	17.9273	18.1163	17.1516	17.9267	17.9229	17.9817	17.9494	17.9654	19.5053	19.2982	19.2849	19.2193	19.3077	19.0919	19.2491	19.3714	19.1973	19.306	19.2052	NaN	NaN	NaN	NaN	NaN	NaN	NaN	NaN	NaN	NaN	NaN	17.4426	17.4237	17.5993	17.5624	17.6122	17.7112	17.3464	17.279	17.2392	16.9503	17.3873
WIPF3	WAS/WASL-interacting protein family member 3	93	GTNKEGGGSANTRGASTPPTLGDLFAGGFPV	GAS(0.848)T(0.144)PPT(0.007)LGDLFAGGFPVLRPAGQR	1	NaN	NaN	NaN	NaN	NaN	NaN	NaN	NaN	NaN	NaN	NaN	16.4307	16.2334	16.0822	16.2847	16.2717	16.159	16.0241	15.9126	16.2829	16.3411	16.1818	NaN	NaN	NaN	NaN	NaN	NaN	NaN	NaN	NaN	NaN	NaN	NaN	NaN	NaN	NaN	NaN	NaN	NaN	NaN	NaN	NaN	NaN
WIPF3	WAS/WASL-interacting protein family member 3	383	AGGGKLNPPPAPPARSPTTELSSKSQQATAW	LNPPPAPPARS(0.998)PT(0.002)TELSSK	1	NaN	NaN	NaN	NaN	NaN	NaN	NaN	NaN	NaN	NaN	NaN	20.5391	20.8077	20.736	20.8708	20.686	20.7834	20.8867	20.6736	21.0482	20.6619	20.7872	18.4169	18.5338	18.4931	18.4834	18.468	18.4351	18.2878	18.1428	18.0485	18.3959	18.1102	18.0498	18.194	18.1926	18.1847	18.0219	18.0531	17.9258	17.7666	17.6981	17.9455	17.9867
WIPF3	WAS/WASL-interacting protein family member 3	451	EYKPCQKIYPSKIPRSRTPGPWLQAEAVGQS	S(0.5)RT(0.5)PGPWLQAEAVGQSSDDIK	1	NaN	NaN	NaN	NaN	NaN	NaN	NaN	NaN	NaN	NaN	NaN	NaN	NaN	NaN	NaN	NaN	NaN	NaN	NaN	NaN	NaN	NaN	NaN	NaN	NaN	NaN	NaN	NaN	NaN	NaN	NaN	NaN	NaN	19.1341	18.5775	18.9952	18.852	18.5968	19.1248	19.5844	19.597	19.71	20.1211	19.782
WIPF3	WAS/WASL-interacting protein family member 3	194	PPPPPPPLPPPLPSSSPIKTPLVSPPGPLTK	TAPPRPNVPAPPPPTPPPPPPPLPPPLPS(0.084)S(0.237)S(0.679)PIK	1	NaN	NaN	NaN	NaN	NaN	NaN	NaN	NaN	NaN	NaN	NaN	NaN	NaN	NaN	NaN	NaN	NaN	NaN	NaN	NaN	NaN	NaN	16.389	16.923	17.1046	16.9525	16.6994	16.5394	16.9235	16.8892	16.4601	17.0517	16.8596	NaN	NaN	NaN	NaN	NaN	NaN	NaN	NaN	NaN	NaN	NaN
WIPF3	WAS/WASL-interacting protein family member 3	149	RLPNKTISGPLIPPASPRLGNTSEAHGAART	TISGPLIPPAS(1)PR	1	20.0689	19.9755	19.9119	19.8721	20.0551	20.3168	19.9125	19.9073	20.0588	20.3188	20.111	20.2349	20.1738	20.1644	20.0634	20.3275	20.2395	20.2721	20.3021	20.1196	20.4571	20.1594	19.2145	19.0917	19.1711	18.9629	18.8629	19.3621	19.3524	18.8896	18.6355	19.38	19.0224	19.8185	19.7692	19.9458	19.7328	19.6659	20.1057	20.228	19.7715	19.6376	20.1303	19.8096
WIPF3	WAS/WASL-interacting protein family member 3	202	PPPLPSSSPIKTPLVSPPGPLTKGNLPVVAP	TPLVS(1)PPGPLTK	1	17.3795	17.7649	17.6153	17.7285	17.5753	17.8499	17.4587	17.0934	17.3799	17.3921	17.2599	18.3385	19.0485	18.6816	18.9179	18.4092	18.735	18.7263	17.7973	18.3463	18.2053	18.2773	NaN	NaN	NaN	NaN	NaN	NaN	NaN	NaN	NaN	NaN	NaN	18.0717	18.2566	18.1274	17.7459	17.6774	17.9226	18.1006	17.3653	17.4405	17.9594	17.0634
PHC2	Polyhomeotic-like protein 2	723	DSSRCSDNSSYEEPLSPISASSSTSRRRQGQ	CSDNSSYEEPLS(1)PISASSSTSR	1	18.6778	19.6264	19.516	18.9652	18.8866	18.2288	18.509	18.1521	18.4153	18.3969	18.4009	17.798	18.7661	18.6579	18.0405	17.8482	17.0445	17.2715	17.4422	17.309	16.705	17.2777	17.7881	18.7677	18.7198	18.399	18.2203	18.1471	17.464	17.6006	17.534	17.695	17.7342	17.8459	18.6786	18.6254	18.6493	18.3023	17.3819	17.4516	17.7061	17.7394	17.1725	17.5655
PHC2	Polyhomeotic-like protein 2	593	LPEKLPQQDHTTTTDSEMEEPYLQESKEEGA	LPQQDHT(0.006)T(0.042)T(0.428)T(0.524)DS(1)EMEEPYLQESK	1;2	17.1979	16.9173	17.053	16.6551	17.0635	16.1592	17.0861	16.8129	16.5886	16.8943	16.8601	NaN	NaN	NaN	NaN	NaN	NaN	NaN	NaN	NaN	NaN	NaN	NaN	NaN	NaN	NaN	NaN	NaN	NaN	NaN	NaN	NaN	NaN	NaN	NaN	NaN	NaN	NaN	NaN	NaN	NaN	NaN	NaN	NaN
PHC2	Polyhomeotic-like protein 2	246	QPLPTPAQSRNTAQASPAGAKPGIADSVMEP	NTAQAS(1)PAGAK	1	18.4218	19.2761	18.7241	18.8277	18.2671	16.4897	18.4102	17.6989	18.3037	18.2816	18.1441	18.4821	19.3151	18.8357	18.8304	18.5821	17.0115	18.7459	17.7836	18.3002	18.2206	17.9089	NaN	NaN	NaN	NaN	NaN	NaN	NaN	NaN	NaN	NaN	NaN	19.1381	19.4119	18.7312	18.9401	18.7239	19.2156	18.6144	18.3177	18.447	17.9044	18.3128
RASA2	Ras GTPase-activating protein 2	233	NPQFNEIFYFEVTRSSSYTRKSQFQVEEEDI	S(0.05)S(0.529)S(0.326)YT(0.095)RK	1	NaN	NaN	NaN	NaN	NaN	NaN	NaN	NaN	NaN	NaN	NaN	NaN	NaN	NaN	NaN	NaN	NaN	NaN	NaN	NaN	NaN	NaN	19.9092	19.9502	20.0338	19.7825	19.7131	19.8812	19.993	19.9699	19.8174	19.9201	19.8476	NaN	NaN	NaN	NaN	NaN	NaN	NaN	NaN	NaN	NaN	NaN
RASA2	Ras GTPase-activating protein 2	234	PQFNEIFYFEVTRSSSYTRKSQFQVEEEDIE	SSS(0.997)YT(0.003)RK	1	21.3315	21.3046	21.2256	21.2218	21.3103	20.9152	21.5437	21.6331	21.5315	21.5127	21.4529	21.7314	21.7478	21.7487	21.8546	21.8843	21.4727	22.1055	22.067	22.0257	22.0893	21.9541	NaN	NaN	NaN	NaN	NaN	NaN	NaN	NaN	NaN	NaN	NaN	22.9471	22.7868	23.0329	22.7021	22.7428	22.9369	22.9855	22.8764	22.8862	22.9342	23.0429
SHANK2	SH3 and multiple ankyrin repeat domains protein 2	229	YERQGIAVMTPTVPGSPKAPFLGIPREARRS	QGIAVMTPTVPGS(1)PK	1	NaN	NaN	NaN	NaN	NaN	NaN	NaN	NaN	NaN	NaN	NaN	17.7103	17.5183	17.6978	17.8332	17.6206	17.9511	18.0295	17.7702	17.6649	18.1228	17.9897	NaN	NaN	NaN	NaN	NaN	NaN	NaN	NaN	NaN	NaN	NaN	16.5137	16.4369	16.7553	16.7277	16.5508	16.4147	16.7275	16.8401	16.2197	16.8708	16.8037
MON1A	Vacuolar fusion protein MON1 homolog A	64	EPGAGQEGAMFVHARSYEDLTESEDGAASGD	S(1)YEDLTESEDGAASGDSHK	1	19.1026	18.5856	18.4704	18.3865	18.5251	19.5415	19.5001	19.3944	19.4717	19.3162	19.4625	19.9017	19.5244	19.1671	19.2208	19.4443	20.5863	20.2333	20.2956	20.3205	20.0474	20.4834	NaN	NaN	NaN	NaN	NaN	NaN	NaN	NaN	NaN	NaN	NaN	19.5511	18.5637	18.0843	18.2909	18.4893	19.9488	19.6924	19.866	19.5215	19.3059	19.3957
SLAIN1	SLAIN motif-containing protein 1	474	HGAGNGISRIQSCIPSPGQLQHRVHSVGHFP	IQSCIPS(1)PGQLQHR	1	NaN	NaN	NaN	NaN	NaN	NaN	NaN	NaN	NaN	NaN	NaN	18.3144	18.978	18.142	18.4829	18.2003	18.733	18.5935	18.0288	18.5546	18.3629	17.7425	NaN	NaN	NaN	NaN	NaN	NaN	NaN	NaN	NaN	NaN	NaN	18.3315	18.9451	18.2634	18.1245	17.6242	18.3648	18.3433	17.6183	18.0183	18.3006	17.5049
SLAIN1	SLAIN motif-containing protein 1	365	EFDHLPPPQPRLPRCSPFQRGIPHSQTFSSI	LPRCS(1)PFQR	1	NaN	NaN	NaN	NaN	NaN	NaN	NaN	NaN	NaN	NaN	NaN	NaN	NaN	NaN	NaN	NaN	NaN	NaN	NaN	NaN	NaN	NaN	NaN	NaN	NaN	NaN	NaN	NaN	NaN	NaN	NaN	NaN	NaN	NaN	NaN	NaN	NaN	NaN	NaN	NaN	NaN	NaN	NaN	NaN
SLAIN1	SLAIN motif-containing protein 1	224	WLYIGSSKTFTSSEKSLTPLQWCRHVLDNPT	S(0.532)LT(0.468)PLQWCR	1	NaN	NaN	NaN	NaN	NaN	NaN	NaN	NaN	NaN	NaN	NaN	NaN	NaN	NaN	NaN	NaN	NaN	NaN	NaN	NaN	NaN	NaN	18.1119	18.3637	17.6058	17.6564	17.3808	18.3954	18.2443	17.0787	17.686	18.0679	17.345	NaN	NaN	NaN	NaN	NaN	NaN	NaN	NaN	NaN	NaN	NaN
SLAIN1	SLAIN motif-containing protein 1	425	PDQQPNRTNGDKLRRSMPNLARMPSTTAISS	S(1)MPNLAR	1	NaN	NaN	NaN	NaN	NaN	NaN	NaN	NaN	NaN	NaN	NaN	17.6663	18.3078	17.8823	17.9554	17.8165	17.5586	17.6641	17.3258	17.6822	17.8152	17.3875	NaN	NaN	NaN	NaN	NaN	NaN	NaN	NaN	NaN	NaN	NaN	NaN	NaN	NaN	NaN	NaN	NaN	NaN	NaN	NaN	NaN	NaN
ELMSAN1	ELM2 and SANT domain-containing protein 1	636	PPVYSNITPYQSHLRSPVRLADHPSERSFEL	AGTFIAPPVYSNITPYQS(0.002)HLRS(0.998)PVR	1	16.422	16.6831	16.5333	16.6796	16.6947	16.7134	16.6429	16.3823	16.7523	16.8154	16.68	19.2541	19.5031	19.5836	19.5086	19.4319	19.3175	19.3081	19.0907	19.3604	18.9654	19.0458	17.4326	17.3285	17.7862	17.5495	17.3121	17.5298	17.8147	17.486	17.6507	17.9759	17.6507	16.436	16.2308	16.4276	16.2276	16.2897	16.5516	16.5498	16.2941	16.0473	16.419	15.8921
ELMSAN1	ELM2 and SANT domain-containing protein 1	461	LRGGVIQSTRRRRRASQEANLLTLAQKAVEL	RAS(1)QEANLLTLAQK	1	19.4881	19.5621	19.5514	19.5675	19.6359	19.528	19.6311	19.5323	19.7215	19.6535	19.6948	20.5255	20.5969	20.5627	20.6563	20.64	20.7498	20.6208	20.6691	20.8915	20.696	20.6919	19.9942	19.8415	19.9751	19.9529	19.9475	20.0636	19.9905	20.12	20.0313	20.0939	19.9918	20.8558	20.7321	20.8456	20.8229	20.717	20.8576	20.9387	20.8965	20.802	21.005	20.7485
ELMSAN1	ELM2 and SANT domain-containing protein 1	923	KTSQKFPRVPLPRRESPSEERLEPKREVKEP	RES(1)PSEERLEPK	1	20.8932	20.9457	20.883	20.9754	20.8285	20.4785	21.0504	20.8803	21.1367	20.8855	21.1117	19.7556	19.6348	19.6601	19.8235	19.738	20.8011	19.9894	19.7199	20.0095	19.8139	19.8264	20.7945	20.4352	20.6379	20.6053	20.6166	20.8664	20.7495	20.9183	20.6317	20.4228	20.7193	21.2568	21.0021	20.9949	21.0542	21.1458	21.409	21.038	21.2358	21.0922	20.9179	21.1674
ELMSAN1	ELM2 and SANT domain-containing protein 1	996	SDILILRSHESNAPGSAGGQASEKPREGTGK	SHESNAPGS(1)AGGQASEK	1	NaN	NaN	NaN	NaN	NaN	NaN	NaN	NaN	NaN	NaN	NaN	17.7539	18.0194	18.0724	17.8419	17.9983	19.2246	17.8331	17.4719	17.9159	17.7283	17.7724	16.1177	16.407	16.1807	16.1322	16.2409	16.3526	16.118	15.8635	16.1196	15.7159	16.062	17.3858	17.9218	17.6092	17.5334	17.595	17.56	17.2963	17.2846	17.2556	17.2813	17.1409
ELMSAN1	ELM2 and SANT domain-containing protein 1	700	PITPKSAHRTLLRTNSAEVTPPVLSVMGEAT	T(0.528)NS(0.534)AEVT(0.816)PPVLS(0.275)VMGEAT(0.814)PVS(0.033)IEPR	1;3	NaN	NaN	NaN	NaN	NaN	NaN	NaN	NaN	NaN	NaN	NaN	NaN	NaN	NaN	NaN	NaN	NaN	NaN	NaN	NaN	NaN	NaN	15.3455	15.1231	15.4192	15.5104	15.5749	15.7106	15.6909	15.8236	15.6598	15.7153	15.7928	NaN	NaN	NaN	NaN	NaN	NaN	NaN	NaN	NaN	NaN	NaN
ELMSAN1	ELM2 and SANT domain-containing protein 1	709	TLLRTNSAEVTPPVLSVMGEATPVSIEPRIN	TNSAEVT(0.062)PPVLS(0.929)VMGEAT(0.937)PVS(0.071)IEPR	1;2	15.981	16.2925	16.3672	16.418	16.3108	16.4911	16.3734	16.2425	16.4898	16.4703	16.2308	NaN	NaN	NaN	NaN	NaN	NaN	NaN	NaN	NaN	NaN	NaN	NaN	NaN	NaN	NaN	NaN	NaN	NaN	NaN	NaN	NaN	NaN	NaN	NaN	NaN	NaN	NaN	NaN	NaN	NaN	NaN	NaN	NaN
RMI1	RecQ-mediated genome instability protein 1	292	TIPTRQSSFEPEFVISPRPKEEPSNLSIHVM	QSSFEPEFVIS(1)PRPK	1	NaN	NaN	NaN	NaN	NaN	NaN	NaN	NaN	NaN	NaN	NaN	19.6218	21.0577	20.3384	21.0334	20.1112	19.188	20.0141	19.3756	21.4419	20.0776	19.7562	NaN	NaN	NaN	NaN	NaN	NaN	NaN	NaN	NaN	NaN	NaN	NaN	NaN	NaN	NaN	NaN	NaN	NaN	NaN	NaN	NaN	NaN
ROBO1	Roundabout homolog 1	1372	TDDLPPPPVPPPAIKSPTAQSKTQLEVRPVV	S(0.995)PT(0.005)AQSK	1	16.8047	16.789	17.0065	16.9564	17.0826	17.9963	17.1301	16.787	17.1551	17.3861	16.7505	17.7953	18.2199	17.9186	17.9565	18.037	18.757	17.8438	17.9361	18.0337	17.8448	17.4443	16.0879	16.3869	16.3793	16.2006	15.964	16.1859	16.6751	16.0125	15.6598	16.7853	16.1496	18.7871	19.2077	19.3863	19.0073	18.6671	18.7043	19.5622	18.8182	18.7907	19.3834	18.6671
ROBO1	Roundabout homolog 1	820	RNGLTSTYAGIRKVPSFTFTPTVTYQRGGEA	KVPS(0.999)FT(0.001)FTPTVTYQR	1	NaN	NaN	NaN	NaN	NaN	NaN	NaN	NaN	NaN	NaN	NaN	18.775	19.1888	18.8049	19.2544	18.9592	19.6257	19.3082	19.1734	19.372	19.3383	19.1613	18.3642	18.5515	18.7741	18.6213	18.1745	18.6356	18.8044	18.5428	18.6492	19.0684	18.7407	18.6567	18.9722	19.1384	19.14	18.6823	19.0345	19.3077	19.0533	19.1495	19.5267	19.0035
ROBO1	Roundabout homolog 1	935	DVDLSNKINEMKTFNSPNLKDGRFVNPSGQP	TFNS(1)PNLK	1	NaN	NaN	NaN	NaN	NaN	NaN	NaN	NaN	NaN	NaN	NaN	20.2627	20.437	20.258	20.3123	20.5527	22.5061	20.6379	20.6169	20.6059	20.7501	20.5533	18.9933	19.1961	19.4968	19.0191	18.8922	18.8611	19.4312	18.9624	19.0047	19.0771	19.048	21.0641	21.2488	21.5675	21.3114	21.0789	21.0429	21.5507	21.193	21.199	21.2381	21.2099
IARS	Isoleucine--tRNA ligase, cytoplasmic	1047	FIFTTIKAPLKPYPVSPSDKVLIQEKTQLKG	PYPVS(0.997)PS(0.003)DK	1	19.6491	20.1549	19.6976	19.6576	19.5744	17.9725	20.1002	19.6159	19.8596	19.6276	19.3098	19.4937	19.4671	19.0821	19.1476	19.0564	18.5493	19.6018	19.1461	19.0566	19.2597	18.8609	19.3474	19.5178	19.3781	19.1085	19.038	19.4279	19.2312	18.8569	19.1411	18.7817	18.9504	19.3555	19.643	19.4297	19.2953	19.2872	19.7193	19.2303	18.9458	19.39	18.4809	19.0559
IARS	Isoleucine--tRNA ligase, cytoplasmic	1049	FTTIKAPLKPYPVSPSDKVLIQEKTQLKGSE	APLKPYPVS(0.418)PS(0.582)DK	1	NaN	NaN	NaN	NaN	NaN	NaN	NaN	NaN	NaN	NaN	NaN	NaN	NaN	NaN	NaN	NaN	NaN	NaN	NaN	NaN	NaN	NaN	NaN	NaN	NaN	NaN	NaN	NaN	NaN	NaN	NaN	NaN	NaN	NaN	NaN	NaN	NaN	NaN	NaN	NaN	NaN	NaN	NaN	NaN
EZH1	Histone-lysine N-methyltransferase EZH1	379	SNASASAVAETKEGDSDRDTGNDWASSSSEA	EGDS(1)DRDTGNDWASSSSEANSR	1	NaN	NaN	NaN	NaN	NaN	NaN	NaN	NaN	NaN	NaN	NaN	NaN	NaN	NaN	NaN	NaN	NaN	NaN	NaN	NaN	NaN	NaN	NaN	NaN	NaN	NaN	NaN	NaN	NaN	NaN	NaN	NaN	NaN	NaN	NaN	NaN	NaN	NaN	NaN	NaN	NaN	NaN	NaN	NaN
ATP1A3	Sodium/potassium-transporting ATPase subunit alpha-3	10	______MGDKKDDKDSPKKNKGKERRDLDDL	KDDKDS(1)PK	1	NaN	NaN	NaN	NaN	NaN	NaN	NaN	NaN	NaN	NaN	NaN	NaN	NaN	NaN	NaN	NaN	NaN	NaN	NaN	NaN	NaN	NaN	NaN	NaN	NaN	NaN	NaN	NaN	NaN	NaN	NaN	NaN	NaN	19.778	19.4015	20.5628	20.1877	19.6069	19.4608	20.139	20.219	20.0216	19.6959	20.1701
ATP1A3;ATP1A2;ATP1A1	Sodium/potassium-transporting ATPase subunit alpha-3;Sodium/potassium-transporting ATPase subunit alpha-2;Sodium/potassium-transporting ATPase subunit alpha-1	722	RQGAIVAVTGDGVNDSPALKKADIGVAMGIA	QGAIVAVTGDGVNDS(1)PALK	1	NaN	NaN	NaN	NaN	NaN	NaN	NaN	NaN	NaN	NaN	NaN	NaN	NaN	NaN	NaN	NaN	NaN	NaN	NaN	NaN	NaN	NaN	NaN	NaN	NaN	NaN	NaN	NaN	NaN	NaN	NaN	NaN	NaN	16.4683	16.4586	16.2978	15.9619	15.8048	16.2203	17.1227	16.4017	16.6877	17.3542	16.7847
SCAF8	Protein SCAF8	695	VKSSEPVKETVQTTQSPTPVEKETVVTTQAE	ETVQTTQS(1)PTPVEK	1	23.1015	23.202	23.3378	23.3358	23.307	23.2704	23.3764	23.2696	23.4795	23.2646	23.565	22.7107	22.8377	22.8889	22.9457	22.7767	22.7149	22.9816	22.8739	23.1098	22.741	23.0666	21.244	21.2792	21.3799	21.1869	21.1531	21.2654	21.2379	21.2968	21.0868	21.2199	21.3109	22.3506	22.3912	22.4049	22.3417	22.3478	22.4757	22.3836	22.5732	22.2937	22.2609	22.4819
SCAF8	Protein SCAF8	351	SFNKKLMDRFDFGEDSEHSEEPKKEIPASQL	LMDRFDFGEDS(0.961)EHS(0.039)EEPKK	1	17.2147	17.034	17.4711	17.413	17.1984	17.5334	17.108	17.1814	17.4947	17.2737	17.2527	NaN	NaN	NaN	NaN	NaN	NaN	NaN	NaN	NaN	NaN	NaN	NaN	NaN	NaN	NaN	NaN	NaN	NaN	NaN	NaN	NaN	NaN	NaN	NaN	NaN	NaN	NaN	NaN	NaN	NaN	NaN	NaN	NaN
SCAF8	Protein SCAF8	525	RSRSRERKRKSSRSYSSERRAREREKERQKK	SYS(0.999)S(0.001)ERR	1;2	21.9892	22.0525	22.2151	21.9853	22.0412	21.7387	21.9602	21.7909	22.0345	22.0014	22.0635	20.8272	20.8284	20.9476	20.8242	20.9679	20.9207	20.8435	20.7651	20.986	20.5949	21.164	21.1446	21.192	21.302	21.0697	21.0366	21.1766	21.0091	21.1319	20.951	21.1028	21.1162	20.3185	20.489	20.5478	20.199	20.4909	20.2103	20.1968	20.4722	20.141	20.3601	20.2847
SCAF8	Protein SCAF8	526	SRSRERKRKSSRSYSSERRAREREKERQKKG	S(0.002)YS(0.342)S(0.656)ERR	1	NaN	NaN	NaN	NaN	NaN	NaN	NaN	NaN	NaN	NaN	NaN	NaN	NaN	NaN	NaN	NaN	NaN	NaN	NaN	NaN	NaN	NaN	NaN	NaN	NaN	NaN	NaN	NaN	NaN	NaN	NaN	NaN	NaN	16.324	16.485	16.7005	16.2333	16.3264	16.3081	16.2577	16.3992	16.1465	16.2767	16.2145
SMARCA4	Transcription activator BRG1	610	QTPAIGPDGEPLDETSQMSDLPVKVIHVESG	KAENAEGQT(0.006)PAIGPDGEPLDET(0.879)S(0.879)QMS(0.236)DLPVK	1;2	16.0914	16.2567	16.308	16.4961	16.5883	16.3337	16.2464	16.2927	16.2723	16.3149	16.3783	NaN	NaN	NaN	NaN	NaN	NaN	NaN	NaN	NaN	NaN	NaN	NaN	NaN	NaN	NaN	NaN	NaN	NaN	NaN	NaN	NaN	NaN	NaN	NaN	NaN	NaN	NaN	NaN	NaN	NaN	NaN	NaN	NaN
SMARCA4	Transcription activator BRG1	613	AIGPDGEPLDETSQMSDLPVKVIHVESGKIL	KAENAEGQTPAIGPDGEPLDET(0.001)SQMS(0.999)DLPVK	1;2	20.0572	20.3445	20.2726	20.5471	20.5627	20.1474	20.2476	20.1747	20.3448	20.3222	20.0032	21.2774	21.3894	21.4713	21.5365	21.8714	21.1284	21.2635	21.3429	21.635	21.2433	21.5636	NaN	NaN	NaN	NaN	NaN	NaN	NaN	NaN	NaN	NaN	NaN	21.5833	21.9612	22.133	21.9093	21.8347	21.7299	21.6049	21.5383	21.3892	21.2988	21.6539
SMARCA4	Transcription activator BRG1	1388	QKKSSRKRKRDSDAGSSTPTTSTRSRDKDDE	DSDAGS(0.96)S(0.011)T(0.029)PTTSTR	1	NaN	NaN	NaN	NaN	NaN	NaN	NaN	NaN	NaN	NaN	NaN	18.234	18.6247	18.4158	18.6568	18.6484	18.4912	18.4804	18.9795	18.9181	18.9472	18.8953	16.9769	17.6474	17.4369	17.4551	17.3044	17.1826	17.1955	17.2669	17.1697	17.7966	17.33	18.5751	18.5353	18.6695	18.6083	18.3674	18.5918	18.6938	18.9683	18.7068	19.2608	18.7542
SMARCA4	Transcription activator BRG1	1389	KKSSRKRKRDSDAGSSTPTTSTRSRDKDDES	DSDAGS(0.293)S(0.851)T(0.851)PT(0.004)TSTR	1;2	NaN	NaN	NaN	NaN	NaN	NaN	NaN	NaN	NaN	NaN	NaN	NaN	NaN	NaN	NaN	NaN	NaN	NaN	NaN	NaN	NaN	NaN	16.4524	16.4584	16.526	16.5873	16.4039	16.4853	16.5288	16.577	16.6565	16.6256	16.7025	NaN	NaN	NaN	NaN	NaN	NaN	NaN	NaN	NaN	NaN	NaN
SMARCA4	Transcription activator BRG1	1349	FGRGSRHRKEVDYSDSLTEKQWLKAIEEGTL	EVDYSDS(1)LTEK	1	NaN	NaN	NaN	NaN	NaN	NaN	NaN	NaN	NaN	NaN	NaN	20.6848	21.2448	20.8006	20.8538	20.8142	20.8999	20.8896	20.4651	20.8276	20.6444	20.4278	20.7591	20.9296	20.6901	20.6309	20.3129	20.6641	20.7561	20.3204	20.4063	20.5188	20.1621	21.7683	21.844	21.5363	21.4694	21.0693	21.5572	21.6073	21.0593	21.2176	21.2764	20.8357
SMARCA4	Transcription activator BRG1	1419	SKKQKKRGRPPAEKLSPNPPNLTKKMKKIVD	LS(1)PNPPNLTK	1	21.3487	21.3569	21.1149	21.1342	21.2406	19.5388	21.4765	21.2113	21.4048	21.265	21.3728	22.1541	22.2531	22.1938	22.1342	22.2435	22.0413	22.3904	22.174	22.4562	22.1581	22.2776	21.6853	21.457	21.5038	21.3663	21.2768	21.7602	21.0495	21.5051	21.4433	20.2897	21.3184	22.4448	22.336	22.2892	22.1732	22.1747	22.4617	22.1758	22.339	22.2327	21.7428	21.9983
SMARCA4	Transcription activator BRG1	695	PTLPVEEKKKIPDPDSDDVSEVDARHIIENA	KIPDPDS(1)DDVS(1)EVDAR	1;2	18.8829	18.1885	18.3333	18.4244	18.7132	18.5845	18.8577	18.9759	19.0017	19.1843	18.9417	21.8877	21.2364	21.2269	21.5355	21.6383	21.7221	22.0009	21.9903	22.1796	22.0127	22.0335	21.0012	20.2971	20.4471	20.4751	20.56	21.0304	21.0971	21.1465	20.9037	21.1963	20.9338	21.9053	21.3344	21.1574	21.2839	21.2719	21.8904	21.7887	21.7554	21.641	21.8039	21.6498
SMARCA4	Transcription activator BRG1	699	VEEKKKIPDPDSDDVSEVDARHIIENAKQDV	KIPDPDS(1)DDVS(1)EVDAR	1;2	16.2011	15.6784	15.3016	15.588	15.8334	16.2632	16.204	16.2129	16.265	16.3728	16.3305	18.8267	19.0219	18.9919	19.0023	19.2397	18.6683	18.856	18.9249	18.9987	18.9143	18.9329	NaN	NaN	NaN	NaN	NaN	NaN	NaN	NaN	NaN	NaN	NaN	NaN	NaN	NaN	NaN	NaN	NaN	NaN	NaN	NaN	NaN	NaN
WDR36	WD repeat-containing protein 36	399	RLPPITKFAAEEARESDWDGIIACHQGKLSC	FAAEEARES(1)DWDGIIACHQGK	1	17.4327	17.6758	17.7106	17.7773	17.6473	18.1187	17.6919	17.7313	17.8463	17.7889	17.6804	17.883	18.1838	18.0613	18.1857	18.1588	18.0349	18.028	17.8346	18.1128	17.9289	17.9119	17.2444	17.4185	17.611	17.4486	17.1324	17.1959	17.3165	17.2228	17.3311	17.6347	17.2011	18.0273	18.3756	18.3221	18.0014	18.1201	18.2905	18.0681	18.1708	18.261	18.2212	18.1223
WDR36	WD repeat-containing protein 36	805	LLKESGPSGIETELRSLSPDCGGSIEVMQSF	S(0.5)LS(0.5)PDCGGSIEVMQSFLK	1	NaN	NaN	NaN	NaN	NaN	NaN	NaN	NaN	NaN	NaN	NaN	15.2791	15.632	15.9441	15.442	15.5117	13.77	14.9472	14.5439	15.4045	15.0839	14.9049	NaN	NaN	NaN	NaN	NaN	NaN	NaN	NaN	NaN	NaN	NaN	14.2715	14.5329	15.1439	15.5428	15.3334	14.9515	14.814	15.1128	14.5829	14.3318	13.9297
WDR36	WD repeat-containing protein 36	807	KESGPSGIETELRSLSPDCGGSIEVMQSFLK	S(0.5)LS(0.5)PDCGGSIEVMQSFLK	1	NaN	NaN	NaN	NaN	NaN	NaN	NaN	NaN	NaN	NaN	NaN	15.2791	15.632	15.9441	15.442	15.5117	13.77	14.9472	14.5439	15.4045	15.0839	14.9049	NaN	NaN	NaN	NaN	NaN	NaN	NaN	NaN	NaN	NaN	NaN	14.2715	14.5329	15.1439	15.5428	15.3334	14.9515	14.814	15.1128	14.5829	14.3318	13.9297
WDR36	WD repeat-containing protein 36	813	GIETELRSLSPDCGGSIEVMQSFLKMIGMML	S(0.005)LS(0.054)PDCGGS(0.94)IEVMQSFLK	1	16.9697	17.304	17.3832	17.5809	17.4836	16.6713	17.2344	17.2431	17.2506	17.4319	17.3338	NaN	NaN	NaN	NaN	NaN	NaN	NaN	NaN	NaN	NaN	NaN	NaN	NaN	NaN	NaN	NaN	NaN	NaN	NaN	NaN	NaN	NaN	NaN	NaN	NaN	NaN	NaN	NaN	NaN	NaN	NaN	NaN	NaN
NAV2	Neuron navigator 2	1257	LPGLVNQTDKEKGISSDNESVASCNSVKVNP	GIS(0.128)S(0.871)DNES(0.001)VASCNSVK	1	NaN	NaN	NaN	NaN	NaN	NaN	NaN	NaN	NaN	NaN	NaN	NaN	NaN	NaN	NaN	NaN	NaN	NaN	NaN	NaN	NaN	NaN	NaN	NaN	NaN	NaN	NaN	NaN	NaN	NaN	NaN	NaN	NaN	NaN	NaN	NaN	NaN	NaN	NaN	NaN	NaN	NaN	NaN	NaN
NAV2	Neuron navigator 2	458	EAASRMLTTVGPASSSPKIALKGIAQRTFSR	MLTTVGPASS(0.013)S(0.987)PK	1	16.623	16.7477	16.2075	16.4236	16.7572	16.4905	16.9189	16.8653	16.8744	17.0027	16.5807	18.2853	18.0845	18.0537	18.1944	18.3464	18.1262	18.3477	18.5844	18.3876	18.6002	18.3302	16.4191	16.1964	16.3886	16.1626	16.2893	16.3513	16.6955	16.3085	16.6214	16.5503	16.4346	17.9492	17.8942	17.8036	17.8042	17.6671	17.8772	18.1805	17.8377	17.7181	18.285	17.9628
NAV2	Neuron navigator 2	1097	PKASQVKRSPSDAGRSSGDESKKPLPSSSRT	RS(0.001)PS(0.004)DAGRS(0.577)S(0.417)GDES(0.001)K	1	NaN	NaN	NaN	NaN	NaN	NaN	NaN	NaN	NaN	NaN	NaN	NaN	NaN	NaN	NaN	NaN	NaN	NaN	NaN	NaN	NaN	NaN	NaN	NaN	NaN	NaN	NaN	NaN	NaN	NaN	NaN	NaN	NaN	NaN	NaN	NaN	NaN	NaN	NaN	NaN	NaN	NaN	NaN	NaN
NAV2	Neuron navigator 2	288	KTRGGSTTANNRRSQSFNNYDKSKPVTSPPP	S(0.003)QS(0.997)FNNYDK	1	NaN	NaN	NaN	NaN	NaN	NaN	NaN	NaN	NaN	NaN	NaN	NaN	NaN	NaN	NaN	NaN	NaN	NaN	NaN	NaN	NaN	NaN	NaN	NaN	NaN	NaN	NaN	NaN	NaN	NaN	NaN	NaN	NaN	NaN	NaN	NaN	NaN	NaN	NaN	NaN	NaN	NaN	NaN	NaN
NAV2	Neuron navigator 2	1296	AQTSLQPGAKYPDVASPTLRRLFGGKPTKQV	YPDVAS(0.984)PT(0.016)LRR	1	NaN	NaN	NaN	NaN	NaN	NaN	NaN	NaN	NaN	NaN	NaN	NaN	NaN	NaN	NaN	NaN	NaN	NaN	NaN	NaN	NaN	NaN	19.1573	19.1543	19.2782	19.149	19.057	19.1712	19.2758	19.2769	18.9341	19.3693	19.2691	19.3766	19.4142	19.5367	19.2534	19.295	19.1882	19.4307	19.231	19.1312	19.4428	19.2574
DYNC1I1	Cytoplasmic dynein 1 intermediate chain 1	84	VSYSKETQTPLATHQSEEDEEDEEMVESKVG	ETQTPLAT(0.027)HQS(0.973)EEDEEDEEMVESK	1	NaN	NaN	NaN	NaN	NaN	NaN	NaN	NaN	NaN	NaN	NaN	17.8688	16.9596	17.5072	16.5622	17.4327	17.6301	17.8809	17.7326	18.041	18.1216	17.7673	NaN	NaN	NaN	NaN	NaN	NaN	NaN	NaN	NaN	NaN	NaN	NaN	NaN	NaN	NaN	NaN	NaN	NaN	NaN	NaN	NaN	NaN
SCAP	Sterol regulatory element-binding protein cleavage-activating protein	477	RLSDGGKAGPEEPGDSPPLRHRPRGPPPPSL	AGPEEPGDS(1)PPLR	1	NaN	NaN	NaN	NaN	NaN	NaN	NaN	NaN	NaN	NaN	NaN	20.1269	19.7321	19.6913	19.5215	19.3238	19.3152	19.2874	20.9967	19.257	21.0385	18.863	NaN	NaN	NaN	NaN	NaN	NaN	NaN	NaN	NaN	NaN	NaN	19.9173	21.259	19.8384	19.8945	20.2206	19.9628	20.1327	19.9641	19.8122	20.7902	19.7058
SCAP	Sterol regulatory element-binding protein cleavage-activating protein	448	GDCLTRIPRPGQRRDSGVGSGLEAQESWERL	RDS(1)GVGSGLEAQESWERLS(1)DGGK	1;2	NaN	NaN	NaN	NaN	NaN	NaN	NaN	NaN	NaN	NaN	NaN	NaN	NaN	NaN	NaN	NaN	NaN	NaN	NaN	NaN	NaN	NaN	NaN	NaN	NaN	NaN	NaN	NaN	NaN	NaN	NaN	NaN	NaN	NaN	NaN	NaN	NaN	NaN	NaN	NaN	NaN	NaN	NaN	NaN
SCAP	Sterol regulatory element-binding protein cleavage-activating protein	464	GVGSGLEAQESWERLSDGGKAGPEEPGDSPP	RDS(1)GVGSGLEAQESWERLS(1)DGGK	1;2	NaN	NaN	NaN	NaN	NaN	NaN	NaN	NaN	NaN	NaN	NaN	18.8581	18.4755	18.4361	18.7145	18.8773	18.5451	18.9889	18.8902	19.1023	18.7543	18.9812	NaN	NaN	NaN	NaN	NaN	NaN	NaN	NaN	NaN	NaN	NaN	NaN	NaN	NaN	NaN	NaN	NaN	NaN	NaN	NaN	NaN	NaN
BTAF1	TATA-binding protein-associated factor 172	224	KNKAKRMAKLFAKQRSRDAVETNEKSNDSTD	QRS(1)RDAVETNEK	1	17.341	15.9919	15.9612	15.7662	15.9954	17.1332	17.3511	17.5033	17.519	17.6096	17.1746	17.5399	16.4171	16.1798	16.2102	16.3828	17.6945	18.0389	17.9826	18.0792	18.2461	17.6813	18.6146	17.1166	16.6928	17.1905	17.0389	18.951	18.605	19.0558	18.922	19.1769	18.7967	19.254	18.9043	18.8444	18.9488	18.8426	19.5076	19.4992	19.4179	19.4443	19.4689	19.3753
SYT14	Synaptotagmin-14	120	SEIGDSKCEFSHCSNSPRCSYNKCPSEGSTG	CEFSHCS(0.001)NS(0.999)PR	1	NaN	NaN	NaN	NaN	NaN	NaN	NaN	NaN	NaN	NaN	NaN	NaN	NaN	NaN	NaN	NaN	NaN	NaN	NaN	NaN	NaN	NaN	NaN	NaN	NaN	NaN	NaN	NaN	NaN	NaN	NaN	NaN	NaN	18.8647	18.8076	18.8545	18.7181	18.5553	18.9934	18.7631	18.538	18.7271	18.2017	18.286
SKP2	S-phase kinase-associated protein 2	68	EKEEPDSENIPQELLSNLGHPESPPRKRLKS	EEPDSENIPQELLS(0.983)NLGHPES(0.017)PPRK	1	19.8788	21.3551	21.1712	20.9584	21.0512	19.2036	20.3373	20.0348	21.2363	20.0933	20.2124	NaN	NaN	NaN	NaN	NaN	NaN	NaN	NaN	NaN	NaN	NaN	19.8451	20.4536	20.7157	20.7973	20.3683	20.1631	20.0371	20.8378	20.5993	20.0163	20.2349	NaN	NaN	NaN	NaN	NaN	NaN	NaN	NaN	NaN	NaN	NaN
SKP2	S-phase kinase-associated protein 2	75	ENIPQELLSNLGHPESPPRKRLKSKGSDKDF	EEPDSENIPQELLSNLGHPES(1)PPRK	1;2	20.6609	22.1981	22.1004	21.7843	21.8899	19.2188	20.7292	20.7866	21.9138	20.5418	20.694	22.6165	24.3204	24.0155	23.9284	23.9241	20.0636	22.664	22.7134	24.0103	22.3667	22.7885	21.2173	21.3495	22.0838	21.8531	21.6325	21.2592	20.8854	21.9608	21.432	21.2908	21.4913	22.4111	22.5931	22.9211	23.0832	22.585	22.1845	21.6413	23.0251	22.6652	22.2432	21.9857
SKP2	S-phase kinase-associated protein 2	190	RCPRSFMDQPLAEHFSPFRVQHMDLSNSVIE	SFMDQPLAEHFS(1)PFR	1	17.4351	19.4171	18.8588	20.115	19.1272	17.9788	18.4284	17.9119	20.4838	18.3677	18.9338	17.6828	20.5168	19.8529	21.2846	20.023	18.3537	19.2812	18.6047	21.7117	19.2386	20.1262	16.7629	17.0266	17.156	16.9119	16.8276	16.8693	16.8338	16.5796	16.3312	16.7968	16.6426	18.4251	19.0166	18.9626	18.664	18.8644	18.5079	18.5026	18.3449	18.3753	18.104	18.122
FAM65A	Protein FAM65A	727	KHSDPTLPGTDSLPCSPPVSNSYTQADPMAP	HSDPTLPGT(0.001)DS(0.005)LPCS(0.992)PPVS(0.001)NSYTQADPMAPR	1	16.4798	17.2119	17.0347	16.8988	17.0547	17.2935	17.0363	16.8481	17.0959	16.9956	16.8448	NaN	NaN	NaN	NaN	NaN	NaN	NaN	NaN	NaN	NaN	NaN	15.0405	15.0074	15.3349	15.3129	15.1422	15.316	15.1478	15.1292	14.905	15.3725	15.0663	17.3142	17.2451	17.4577	17.1051	17.4392	17.5157	17.1465	17.466	17.1069	17.0774	17.1949
FAM65A	Protein FAM65A	367	NKASTVTKRFSTYSQSPPDTPSLREQAFYNM	RFS(0.003)T(0.003)YS(0.004)QS(0.99)PPDTPSLR	1	16.9917	16.8794	16.7947	16.8256	16.6723	17.7905	17.5053	17.2365	17.1325	17.1684	17.1499	NaN	NaN	NaN	NaN	NaN	NaN	NaN	NaN	NaN	NaN	NaN	NaN	NaN	NaN	NaN	NaN	NaN	NaN	NaN	NaN	NaN	NaN	NaN	NaN	NaN	NaN	NaN	NaN	NaN	NaN	NaN	NaN	NaN
MPHOSPH9	M-phase phosphoprotein 9	486	SQLPGFPKYPSHTKASPVDSWKNQTFQNESR	AS(1)PVDSWK	1	NaN	NaN	NaN	NaN	NaN	NaN	NaN	NaN	NaN	NaN	NaN	NaN	NaN	NaN	NaN	NaN	NaN	NaN	NaN	NaN	NaN	NaN	NaN	NaN	NaN	NaN	NaN	NaN	NaN	NaN	NaN	NaN	NaN	20.2221	20.4012	20.3533	20.3565	20.2269	20.4823	20.3344	20.4153	20.1252	20.3287	20.2938
MPHOSPH9	M-phase phosphoprotein 9	843	EETCSLGHRSPLEKDSSPGSSSTSLLIKKQR	DS(0.5)S(0.5)PGSSSTSLLIK	1	NaN	NaN	NaN	NaN	NaN	NaN	NaN	NaN	NaN	NaN	NaN	NaN	NaN	NaN	NaN	NaN	NaN	NaN	NaN	NaN	NaN	NaN	NaN	NaN	NaN	NaN	NaN	NaN	NaN	NaN	NaN	NaN	NaN	NaN	NaN	NaN	NaN	NaN	NaN	NaN	NaN	NaN	NaN	NaN
MPHOSPH9	M-phase phosphoprotein 9	844	ETCSLGHRSPLEKDSSPGSSSTSLLIKKQRE	DS(0.005)S(0.995)PGSSSTSLLIK	1	19.0045	19.6805	19.6165	19.6716	19.3882	19.18	19.4701	19.0912	19.422	19.146	19.1729	19.812	20.7154	20.3781	20.192	20.1239	20.0189	20.3036	19.9117	20.5718	20.3509	20.0967	17.2077	17.5681	17.5731	17.4531	17.2864	17.4308	17.3023	17.3638	17.302	17.2637	17.254	17.9075	18.2811	18.2109	18.1349	18.0286	18.1149	18.0121	18.0821	17.8972	18.0181	17.9941
MPHOSPH9	M-phase phosphoprotein 9	954	PTKREIMLTPVTVAYSPKRSPKENLSPGFSH	EIMLTPVTVAYS(1)PK	1	17.3326	17.7371	17.6505	17.8499	17.878	18.6945	17.4295	17.5266	17.8756	17.6399	17.5127	18.0488	18.4146	18.5113	18.4502	18.8094	19.5507	18.2051	18.6592	18.6788	18.2345	18.3162	NaN	NaN	NaN	NaN	NaN	NaN	NaN	NaN	NaN	NaN	NaN	18.394	18.8545	19.0938	18.7954	18.6642	18.4618	18.4413	18.6327	18.6588	18.0613	18.5859
MPHOSPH9	M-phase phosphoprotein 9	964	VTVAYSPKRSPKENLSPGFSHLLSKNESSPI	ENLS(0.994)PGFS(0.006)HLLSK	1	19.2376	19.7244	19.3335	19.4032	19.4937	18.7749	19.2186	18.7047	19.6808	19.0487	18.8625	20.4917	21.1608	20.9339	21.0585	20.8201	20.1418	20.5579	20.3221	21.2151	20.3797	20.3707	16.6334	16.804	16.8353	16.4662	16.2157	16.5157	16.5507	16.5392	16.9339	16.8901	16.4484	20.3782	20.8067	20.709	20.4493	20.4866	20.5318	20.2821	20.2998	20.3807	20.6166	19.9737
MPHOSPH9	M-phase phosphoprotein 9	968	YSPKRSPKENLSPGFSHLLSKNESSPIRFDI;YSPKRSPKENLSPGFSHLLSKNESSPIRKNL	ENLS(0.134)PGFS(0.866)HLLSK	1	16.5193	16.9913	16.6354	16.8852	16.7935	16.4407	16.6283	16.4863	17.1885	16.4872	16.3454	NaN	NaN	NaN	NaN	NaN	NaN	NaN	NaN	NaN	NaN	NaN	NaN	NaN	NaN	NaN	NaN	NaN	NaN	NaN	NaN	NaN	NaN	NaN	NaN	NaN	NaN	NaN	NaN	NaN	NaN	NaN	NaN	NaN
MPHOSPH9	M-phase phosphoprotein 9	976	ENLSPGFSHLLSKNESSPIRFDILLDDLDTV	NES(0.618)S(0.382)PIRFDILLDDLDTVPVSTLQR	1	NaN	NaN	NaN	NaN	NaN	NaN	NaN	NaN	NaN	NaN	NaN	17.688	18.2141	18.0933	17.9071	18.1322	17.8156	17.8271	17.4718	17.7168	17.3127	17.3571	NaN	NaN	NaN	NaN	NaN	NaN	NaN	NaN	NaN	NaN	NaN	18.1686	18.4806	18.4178	18.1964	18.2836	18.1979	18.0497	17.9511	17.9028	17.9895	17.6202
MPHOSPH9	M-phase phosphoprotein 9	977	NLSPGFSHLLSKNESSPIRFDILLDDLDTVP	NES(0.118)S(0.882)PIRFDILLDDLDTVPVSTLQR	1	17.8195	18.3059	18.2063	18.2827	18.2094	18.1419	17.9166	17.8568	18.1073	17.8381	17.7507	NaN	NaN	NaN	NaN	NaN	NaN	NaN	NaN	NaN	NaN	NaN	18.0996	18.5335	18.5912	18.4407	18.1617	18.2306	18.2095	18.1544	18.0582	18.2838	18.0223	NaN	NaN	NaN	NaN	NaN	NaN	NaN	NaN	NaN	NaN	NaN
MPHOSPH9	M-phase phosphoprotein 9	905	TSNINPRQTETSVNASRSPEKCAQQRQKRLN	QTETSVNAS(0.599)RS(0.401)PEK	1	NaN	NaN	NaN	NaN	NaN	NaN	NaN	NaN	NaN	NaN	NaN	NaN	NaN	NaN	NaN	NaN	NaN	NaN	NaN	NaN	NaN	NaN	NaN	NaN	NaN	NaN	NaN	NaN	NaN	NaN	NaN	NaN	NaN	16.1908	16.5936	16.4307	16.5844	16.3622	16.6357	16.1717	16.7969	16.2322	16.0868	16.3761
MPHOSPH9	M-phase phosphoprotein 9	907	NINPRQTETSVNASRSPEKCAQQRQKRLNSA	QTETSVNASRS(1)PEK	1	21.6362	22.3867	22.3492	22.3074	22.3469	21.8144	21.9244	21.8819	22.1263	21.8902	22.0726	20.9836	21.6978	21.6461	21.6984	21.5775	21.1693	21.3368	21.294	21.4903	21.3885	21.4345	19.5229	19.9087	20.0603	19.6622	19.6945	19.5281	19.4256	19.5219	19.3314	19.2744	19.3471	22.0094	22.2234	22.1437	22.1865	22.2465	22.29	21.9074	22.2103	22.1073	21.9865	22.0179
MPHOSPH9	M-phase phosphoprotein 9	928	QQRQKRLNSASQRSSSLPPSNRKSSTPTKRE	SS(0.003)S(0.995)LPPS(0.002)NRK	1	16.9559	17.2433	17.1041	17.329	17.3451	17.0143	17.1923	17.2744	17.4225	17.251	17.351	17.0918	17.4405	17.2857	17.319	17.2681	16.8174	17.1313	17.21	17.1819	17.278	17.3563	16.922	17.2963	17.3954	16.8686	17.1302	17.2344	17.1508	17.2848	16.8234	17.244	17.2893	NaN	NaN	NaN	NaN	NaN	NaN	NaN	NaN	NaN	NaN	NaN
INPPL1	Phosphatidylinositol 3,4,5-trisphosphate 5-phosphatase 2	937	VLEGVPHQLLPPEPPSPARAPVPSATKNKVA	NSFNNPAYYVLEGVPHQLLPPEPPS(0.999)PARAPVPSATK	1	NaN	NaN	NaN	NaN	NaN	NaN	NaN	NaN	NaN	NaN	NaN	NaN	NaN	NaN	NaN	NaN	NaN	NaN	NaN	NaN	NaN	NaN	18.8058	19.6643	19.5619	19.4219	19.4674	19.1338	19.657	19.1748	19.3159	19.4825	19.2454	18.0712	18.7513	18.8336	18.6882	18.6625	18.2705	18.2006	18.3207	18.2575	18.1568	18.2855
CELF4		113	RRAETPAPATPRRLSSLPKRQESMTLIPGLR	RLS(0.099)S(0.901)LPK	1	19.021	19.5977	19.1971	19.4653	19.0592	19.0209	19.1393	18.6898	19.0869	19.1715	18.7747	NaN	NaN	NaN	NaN	NaN	NaN	NaN	NaN	NaN	NaN	NaN	NaN	NaN	NaN	NaN	NaN	NaN	NaN	NaN	NaN	NaN	NaN	NaN	NaN	NaN	NaN	NaN	NaN	NaN	NaN	NaN	NaN	NaN
ZFP91-CNTF;ZFP91	E3 ubiquitin-protein ligase ZFP91	296	EEPPRKRGRRRKDDKSPRLPKRRKKPPIQYV	DDKS(1)PRLPK	1	19.5682	20.2714	19.9109	20.0399	19.7719	19.7872	20.1791	19.7861	20.4031	20.1038	20.0585	19.8212	20.8075	20.289	20.5842	20.3949	20.2049	20.509	20.1641	21.0265	20.4067	20.4933	NaN	NaN	NaN	NaN	NaN	NaN	NaN	NaN	NaN	NaN	NaN	NaN	NaN	NaN	NaN	NaN	NaN	NaN	NaN	NaN	NaN	NaN
ZFP91-CNTF;ZFP91	E3 ubiquitin-protein ligase ZFP91	82	AVSRRRKAEYPRRRRSSPSARPPDVPGQQPQ	RS(0.876)S(0.084)PS(0.04)ARPPDVPGQQPQAAK	1	16.9681	17.071	17.3074	17.2541	17.1613	17.4506	17.1833	17.3434	17.347	17.2757	17.448	16.2737	16.3589	16.1837	16.4043	16.232	16.3407	16.5099	16.3667	16.5246	16.3747	16.715	19.2307	19.2276	19.548	19.4451	19.3252	19.5699	19.5648	19.7473	19.3541	19.3884	19.638	17.059	16.9923	17.1545	17.1826	17.0944	17.3537	17.3728	17.2982	17.1509	17.3791	17.3176
ZFP91-CNTF;ZFP91	E3 ubiquitin-protein ligase ZFP91	83	VSRRRKAEYPRRRRSSPSARPPDVPGQQPQA	RS(0.1)S(0.884)PS(0.016)ARPPDVPGQQPQAAK	1	20.3552	20.5152	20.7093	20.5641	20.7039	20.5942	20.729	20.4922	20.7176	20.5843	20.7182	18.9709	19.2064	19.4563	19.2882	19.2591	19.0562	19.2634	19.1392	19.3245	19.3597	19.4981	NaN	NaN	NaN	NaN	NaN	NaN	NaN	NaN	NaN	NaN	NaN	18.7863	19.0415	18.84	18.9422	18.8844	18.9442	18.8007	18.7498	18.5791	18.646	18.6539
ZFP91-CNTF;ZFP91	E3 ubiquitin-protein ligase ZFP91	101	ARPPDVPGQQPQAAKSPSPVQGKKSPRLLCI	S(0.989)PS(0.011)PVQGK	1	22.3304	22.3209	22.4324	22.3945	22.4572	22.3327	22.5776	22.4716	22.6094	22.5159	22.5873	22.3158	22.1933	22.3279	22.3809	22.3499	22.5744	22.5844	22.49	22.6589	22.5085	22.5316	21.2685	21.2853	21.4721	21.367	21.3141	21.32	21.3266	21.5349	21.2017	21.4887	21.5481	18.4882	18.4884	18.4675	18.4098	18.4712	18.8408	18.6424	18.8304	18.679	18.6016	18.8472
ZFP91-CNTF;ZFP91	E3 ubiquitin-protein ligase ZFP91	103	PPDVPGQQPQAAKSPSPVQGKKSPRLLCIEK	S(0.002)PS(0.998)PVQGK	1	NaN	NaN	NaN	NaN	NaN	NaN	NaN	NaN	NaN	NaN	NaN	22.085	22.1371	22.2737	22.2052	22.2615	22.2243	22.4717	22.167	22.4926	22.3169	22.3372	19.7165	19.68	19.8626	19.7856	19.8073	19.7542	19.8037	19.9505	19.6447	19.9773	19.9866	22.0281	22.201	22.2334	22.1698	22.071	22.1614	22.209	22.2095	22.0101	22.1661	22.2537
NCAPH2	Condensin-2 complex subunit H2	464	GADPREAADLDAVPMSLSYEELVRRNVELFI	EAADLDAVPMS(0.534)LS(0.465)Y(0.001)EELVRR	1	16.2474	16.6157	16.5845	16.8735	16.5977	17.4412	17.1968	16.9428	16.9739	17.1134	16.986	NaN	NaN	NaN	NaN	NaN	NaN	NaN	NaN	NaN	NaN	NaN	NaN	NaN	NaN	NaN	NaN	NaN	NaN	NaN	NaN	NaN	NaN	NaN	NaN	NaN	NaN	NaN	NaN	NaN	NaN	NaN	NaN	NaN
NCAPH2	Condensin-2 complex subunit H2	282	LPEASAPKAALEPKESRSPQQSAALPRRYML	ES(0.667)RS(0.332)PQQS(0.002)AALPR	1	NaN	NaN	NaN	NaN	NaN	NaN	NaN	NaN	NaN	NaN	NaN	15.5746	16.1109	15.6251	16.0706	16.0197	16.0483	15.8239	16.088	16.0053	16.0108	16.2603	15.5795	15.8869	15.4544	15.6851	15.646	15.8369	15.995	15.8089	15.8167	15.9195	15.9366	16.3792	16.6171	16.435	16.2146	16.3384	16.6503	16.5788	16.7758	16.5278	16.7046	16.6537
NCAPH2	Condensin-2 complex subunit H2	284	EASAPKAALEPKESRSPQQSAALPRRYMLRE	ESRS(0.999)PQQSAALPR	1	21.1492	21.6187	21.3503	21.5184	21.2878	21.4876	21.6565	21.626	21.7874	21.4815	21.8382	20.7433	21.6497	21.2032	21.1995	20.8018	21.3046	21.2086	21.1694	21.344	21.1917	20.963	19.6399	19.9996	19.7277	19.7251	19.3848	19.7955	19.8365	19.8307	19.5927	19.7746	19.8241	20.81	21.154	21.0216	20.9983	20.7817	21.1706	21.1287	21.1396	20.8278	21.1327	21.119
NCAPH2	Condensin-2 complex subunit H2	325	VKETPDPWQSLDPFDSLESKPFKKGRPYSVP	ETPDPWQSLDPFDS(1)LESK	1	NaN	NaN	NaN	NaN	NaN	NaN	NaN	NaN	NaN	NaN	NaN	NaN	NaN	NaN	NaN	NaN	NaN	NaN	NaN	NaN	NaN	NaN	17.9807	18.1495	17.8013	17.7636	17.488	18.1522	17.9095	17.5941	17.631	17.7879	17.4022	17.7785	18.0095	17.3134	17.4973	17.159	17.8356	17.6519	17.1029	17.1339	17.0286	16.7835
NCAPH2	Condensin-2 complex subunit H2	208	MLEPEGMSPMEPAGVSPMPGTQKDTGRTEEQ	GAFMLEPEGMSPMEPAGVS(1)PMPGTQK	1	16.2593	16.2676	16.3056	16.384	16.2719	16.7784	16.6523	16.687	16.8504	16.6493	16.5955	18.8829	19.2134	18.9479	19.0162	18.7932	19.6118	19.7962	19.6928	19.8213	19.5246	19.71	17.6065	17.5642	17.244	17.2621	17.0892	17.9184	17.8146	17.7785	17.7354	17.8473	17.8795	19.1306	18.9873	18.6121	18.7522	18.4527	19.5456	19.5257	19.5088	19.3282	19.3525	19.5768
PPAN;PPAN-P2RY11	Suppressor of SWI4 1 homolog	306	RKKSLEGMKKARVGGSDEEASGIPSRTASLE	VGGS(1)DEEASGIPSR	1	22.9248	22.6037	22.6311	22.9484	22.9217	24.3471	23.4864	23.4677	23.6493	23.4248	23.7395	21.4241	21.075	20.9826	21.2771	21.1385	22.5313	21.8254	21.8075	21.9816	21.7249	21.7974	22.1857	21.5919	21.6191	21.5559	21.7253	22.1619	22.5232	22.5439	22.0928	22.5172	22.126	21.9705	21.186	21.2312	21.2784	21.5484	22.2645	22.3716	22.5123	21.8089	22.2439	21.9667
PPAN;PPAN-P2RY11	Suppressor of SWI4 1 homolog	185	RLQDISELLATGAGLSESEAEPDGDHNITEL	LQDISELLATGAGLS(1)ES(1)EAEPDGDHNITELPQAVAGR	1;2	16.3874	16.781	17.0978	16.7183	16.5927	16.7846	16.6953	16.7216	16.6725	16.6115	16.6601	17.7326	18.0158	18.4598	18.0448	17.841	18.0031	18.1198	16.9863	17.7095	17.662	17.8832	15.1464	15.3963	15.1978	15.3389	15.2352	15.3149	15.393	15.6844	15.4984	15.6243	15.358	16.0674	16.325	16.0937	16.0704	16.1072	16.3343	15.8459	16.3103	15.8622	16.2879	16.2652
PPAN;PPAN-P2RY11	Suppressor of SWI4 1 homolog	187	QDISELLATGAGLSESEAEPDGDHNITELPQ	LQDISELLATGAGLS(1)ES(1)EAEPDGDHNITELPQAVAGR	1;2	16.0193	16.45	16.69	16.3206	16.3324	16.2032	16.4902	16.3687	16.2207	16.2278	16.2832	16.5124	16.2369	17.359	16.8753	16.4735	16.9316	16.931	13.8631	16.1528	16.4377	16.6796	NaN	NaN	NaN	NaN	NaN	NaN	NaN	NaN	NaN	NaN	NaN	NaN	NaN	NaN	NaN	NaN	NaN	NaN	NaN	NaN	NaN	NaN
PPAN;PPAN-P2RY11	Suppressor of SWI4 1 homolog	294	NVQRKQEQREAHRKKSLEGMKKARVGGSDEE	S(1)LEGMKK	1	NaN	NaN	NaN	NaN	NaN	NaN	NaN	NaN	NaN	NaN	NaN	NaN	NaN	NaN	NaN	NaN	NaN	NaN	NaN	NaN	NaN	NaN	19.6295	20.2887	18.7958	19.2536	18.5779	19.8586	19.7606	18.7809	19.1301	19.9132	18.7065	19.1701	20.0589	18.6137	19.1737	18.4021	19.6902	19.6716	18.7467	18.8963	19.7473	18.5151
MACF1		132	RRRPNAERKDNVNRRSWKSFMPPNFPEFAER	DNVNRRS(1)WK	1	NaN	NaN	NaN	NaN	NaN	NaN	NaN	NaN	NaN	NaN	NaN	NaN	NaN	NaN	NaN	NaN	NaN	NaN	NaN	NaN	NaN	NaN	NaN	NaN	NaN	NaN	NaN	NaN	NaN	NaN	NaN	NaN	NaN	NaN	NaN	NaN	NaN	NaN	NaN	NaN	NaN	NaN	NaN	NaN
MACF1;KIAA0754	Uncharacterized protein KIAA0754	755	HRNFPEQVFQDLQRKSPESEILSLHLLVEEL	S(0.97)PES(0.03)EILSLHLLVEELR	1	NaN	NaN	NaN	NaN	NaN	NaN	NaN	NaN	NaN	NaN	NaN	NaN	NaN	NaN	NaN	NaN	NaN	NaN	NaN	NaN	NaN	NaN	14.6994	14.9849	14.807	14.984	14.671	14.7017	14.987	14.7685	14.6955	15.0977	14.9044	NaN	NaN	NaN	NaN	NaN	NaN	NaN	NaN	NaN	NaN	NaN
SOX7	Transcription factor SOX-7	218	GSRGALGEKEDRGEYSPGTALPSLRGCYHEG	EDRGEYS(1)PGTALPSLR	1	NaN	NaN	NaN	NaN	NaN	NaN	NaN	NaN	NaN	NaN	NaN	NaN	NaN	NaN	NaN	NaN	NaN	NaN	NaN	NaN	NaN	NaN	NaN	NaN	NaN	NaN	NaN	NaN	NaN	NaN	NaN	NaN	NaN	18.076	18.0163	17.6315	17.8268	18.0134	18.048	18.5282	18.3554	18.1633	18.7394	18.056
SOX7;PINX1	Transcription factor SOX-7;PIN2/TERF1-interacting telomerase inhibitor 1	120	HGQETTDSSDKKEKKSFSLEEKSKISKNRVH	S(1)FSLEEK	1	18.4293	19.376	18.5514	18.8635	18.4188	19.0063	19.0816	18.3244	18.9961	19.1105	18.5218	17.3437	18.4693	17.4702	18.0042	17.5219	18.2803	18.2971	17.6568	18.0487	18.1632	17.7298	18.8637	18.9504	18.576	18.704	18.2044	19.0042	19.2503	18.9075	18.8192	19.3231	18.8576	18.8577	18.734	18.4656	18.4335	18.269	19.0052	18.9074	18.599	18.5323	18.8595	18.5855
DFFB	DNA fragmentation factor subunit beta	15	_MLQKPKSVKLRALRSPRKFGVAGRSCQEVL	ALRS(1)PRK	1	17.5218	17.6125	17.705	17.6416	17.663	18.0425	17.6045	17.4265	17.6201	17.6374	17.5905	18.2237	18.5959	18.4957	18.7561	18.5012	19.0969	18.6994	18.4187	18.7323	18.5391	18.5921	NaN	NaN	NaN	NaN	NaN	NaN	NaN	NaN	NaN	NaN	NaN	18.4897	18.5732	18.6124	18.4477	18.3106	18.5421	18.6397	18.4017	18.3251	18.4985	18.3058
HELLS	Lymphoid-specific helicase	549	IANMFGSSEKETIELSPTGRPKRRTRKSINY	ETIELS(0.996)PT(0.004)GRPK	1	22.089	23.1298	22.4719	22.4812	22.3893	22.4659	22.448	21.8428	22.3016	22.2863	21.9847	22.3324	23.3419	22.7136	22.7122	22.5568	22.6443	22.6344	21.935	22.5174	22.4002	22.1004	16.0127	16.7248	16.1187	16.1345	15.5894	15.965	16.0401	15.7393	15.5328	15.9712	15.7933	21.7402	22.508	21.9003	21.8487	21.3967	22.0435	21.701	21.0491	21.3703	21.5756	20.8869
HELLS	Lymphoid-specific helicase	878	KEKMGIFKILENSEDSSPECLF_________	ILENSEDS(1)S(1)PECLF	1;2	17.2214	16.3524	16.5594	16.4339	16.9958	17.1068	17.3866	17.4415	17.9247	17.5168	17.5081	NaN	NaN	NaN	NaN	NaN	NaN	NaN	NaN	NaN	NaN	NaN	NaN	NaN	NaN	NaN	NaN	NaN	NaN	NaN	NaN	NaN	NaN	NaN	NaN	NaN	NaN	NaN	NaN	NaN	NaN	NaN	NaN	NaN
MED24	Mediator of RNA polymerase II transcription subunit 24	38	FPLDDVQPSKLMRLLSSNEDDANILSSPTDR	LLS(0.977)S(0.023)NEDDANILSSPTDR	1	NaN	NaN	NaN	NaN	NaN	NaN	NaN	NaN	NaN	NaN	NaN	20.7333	20.4273	20.2638	20.4931	20.5302	20.0614	20.6116	20.4967	20.6252	20.3772	20.3788	NaN	NaN	NaN	NaN	NaN	NaN	NaN	NaN	NaN	NaN	NaN	18.8861	18.8119	18.7238	18.7609	18.7035	18.8766	18.7774	18.8173	18.7572	18.7934	18.767
MED24	Mediator of RNA polymerase II transcription subunit 24	39	PLDDVQPSKLMRLLSSNEDDANILSSPTDRS	LLS(0.101)S(0.899)NEDDANILSSPTDR	1	NaN	NaN	NaN	NaN	NaN	NaN	NaN	NaN	NaN	NaN	NaN	NaN	NaN	NaN	NaN	NaN	NaN	NaN	NaN	NaN	NaN	NaN	NaN	NaN	NaN	NaN	NaN	NaN	NaN	NaN	NaN	NaN	NaN	NaN	NaN	NaN	NaN	NaN	NaN	NaN	NaN	NaN	NaN	NaN
MED24	Mediator of RNA polymerase II transcription subunit 24	49	MRLLSSNEDDANILSSPTDRSMSSSLSASQL	LLSSNEDDANILS(0.024)S(0.834)PT(0.142)DR	1	18.7402	18.8102	18.8393	18.9243	18.8352	19.2202	18.9876	18.8126	18.9724	18.895	18.9166	NaN	NaN	NaN	NaN	NaN	NaN	NaN	NaN	NaN	NaN	NaN	NaN	NaN	NaN	NaN	NaN	NaN	NaN	NaN	NaN	NaN	NaN	NaN	NaN	NaN	NaN	NaN	NaN	NaN	NaN	NaN	NaN	NaN
NAA15	N-alpha-acetyltransferase 15, NatA auxiliary subunit	588	LTDENKEHEADTANMSDKELKKLRNKQRRAQ	EHEADTANMS(1)DK	1	21.2523	21.4981	21.1688	21.318	21.4656	20.5871	21.4692	21.51	21.5718	21.5628	21.3786	21.8564	21.8918	21.885	21.9174	22.1048	21.7304	22.1767	22.0982	22.0835	22.2825	22.0359	20.9463	21.2038	21.2382	21.0762	20.9084	21.0908	21.1066	21.0976	20.8839	20.8661	20.9884	22.5443	22.96	22.9198	22.5714	22.5527	22.7133	22.5672	22.6797	22.4541	22.3468	22.6703
NAA15	N-alpha-acetyltransferase 15, NatA auxiliary subunit	854	PPGYEEDMKITVNGDSSAEAEELANEI____	ITVNGDS(1)S(1)AEAEELANEI	1;2	17.6426	17.4644	17.3413	17.5213	17.4878	17.7746	17.9278	17.6234	17.8155	17.8468	17.6515	18.9521	18.5996	18.4527	18.6608	18.7323	18.8489	19.1015	19.158	19.0665	19.0929	19.0324	16.5901	16.2349	16.304	16.1558	16.2876	16.7083	16.523	16.5979	16.387	16.545	16.488	19.2277	18.9353	18.7788	18.6272	18.809	19.2638	19.2995	19.1079	19.1412	19.2655	19.251
NAA15	N-alpha-acetyltransferase 15, NatA auxiliary subunit	855	PGYEEDMKITVNGDSSAEAEELANEI_____	ITVNGDS(1)S(1)AEAEELANEI	1;2	18.1461	17.9601	17.9086	17.9774	18.0121	18.3022	18.4025	18.1635	18.3537	18.3847	18.1808	19.1841	18.8567	18.6854	18.8969	19.0089	19.1306	19.3272	19.3708	19.3221	19.3685	19.2716	17.681	17.4216	17.4815	17.3161	17.3688	17.8289	17.635	17.772	17.4969	17.6946	17.654	16.7457	16.507	16.5035	16.5075	16.6895	16.6784	16.8099	16.7752	16.7634	16.9384	17.0043
SRSF7	Serine/arginine-rich splicing factor 7	123	ECGEKGHYAYDCHRYSRRRRSRFLRLSQSP_;ECGEKGHYAYDCHRYSRRRRSRSRSRSHSRS	GHYAYDCHRYS(1)R	1	18.9294	19.3296	19.4754	19.4706	19.388	19.3537	19.3608	19.2793	19.3918	19.4893	19.2259	20.3371	20.886	20.7984	20.7877	20.7979	20.3359	20.4133	20.3842	20.5116	20.4864	20.3176	NaN	NaN	NaN	NaN	NaN	NaN	NaN	NaN	NaN	NaN	NaN	20.1073	20.444	20.401	20.3391	20.2844	20.2044	20.115	20.1745	20.037	20.1215	20.133
CUTC	Copper homeostasis protein cutC homolog	17	KRQGASSERKRARIPSGKAGAANGFLMEVCV	ARIPS(1)GK	1	17.6548	18.0678	18.0644	17.9079	17.9894	21.9778	18.2184	17.8685	18.4854	18.092	18.0856	NaN	NaN	NaN	NaN	NaN	NaN	NaN	NaN	NaN	NaN	NaN	NaN	NaN	NaN	NaN	NaN	NaN	NaN	NaN	NaN	NaN	NaN	NaN	NaN	NaN	NaN	NaN	NaN	NaN	NaN	NaN	NaN	NaN
CUTC	Copper homeostasis protein cutC homolog	7	_________MKRQGASSERKRARIPSGKAGA	RQGAS(0.991)S(0.009)ERK	1	17.5837	18.1025	17.8269	18.0439	17.9394	16.5666	18.24	18.2668	18.3082	18.1971	18.3258	18.8233	19.247	18.7615	19.127	18.9081	17.0572	19.2255	19.4646	19.3042	19.4621	19.1459	19.0021	19.166	18.6528	18.7476	18.4905	19.3189	19.2657	19.3526	18.95	19.2179	19.037	19.6418	19.692	19.27	19.4741	19.2734	20.0098	19.9689	20.0013	19.6087	20.2082	19.7047
ADAMTS13		272	RAGLAWSPCSRRQLLSLLRPVPPSPLPLLAT	RQLLS(1)LLR	1	14.9065	15.3792	15.5349	15.4087	15.6543	15.8131	15.4773	15.7049	15.6841	15.6494	15.6845	14.9121	14.9594	15.149	15.1053	15.4092	15.2583	15.119	15.3744	15.4478	15.6847	15.1914	15.1689	15.586	15.4666	15.175	15.1464	15.1663	15.3211	15.5303	15.3618	15.4584	15.6074	14.8161	14.5978	14.8743	14.995	14.8171	14.8259	15.2323	15.4049	14.6423	15.1683	14.9388
TUBB3;TUBB;TUBB4B;TUBB4A	Tubulin beta-3 chain;Tubulin beta chain;Tubulin beta-4B chain;Tubulin beta-4A chain	172	EEYPDRIMNTFSVVPSPKVSDTVVEPYNATL	IMNTFSVVPS(1)PK	1	18.762	19.1565	18.968	18.757	18.6269	19.0476	18.9039	18.432	18.6171	18.4693	18.4528	19.2778	19.8002	19.7838	19.5294	19.3204	19.3875	19.6611	18.7401	18.9192	19.0399	18.9484	19.9156	20.0118	19.9274	19.7695	19.4823	19.923	19.9009	19.2841	19.6441	20.1048	19.4643	NaN	NaN	NaN	NaN	NaN	NaN	NaN	NaN	NaN	NaN	NaN
PWP2	Periodic tryptophan protein 2 homolog	898	KRSLDPLGSEEEAEASEDDSLHLLGGGGRDS	RS(0.001)LDPLGS(0.999)EEEAEAS(1)EDDS(1)LHLLGGGGRDS(1)EEEMLA	1;2;3;4	17.741	18.1792	18.312	18.3128	18.4886	18.6872	17.8135	18.1328	18.0078	18.1516	17.8227	NaN	NaN	NaN	NaN	NaN	NaN	NaN	NaN	NaN	NaN	NaN	17.6621	18.8147	18.8109	18.7866	18.7474	17.7025	17.4484	17.7473	17.4203	17.6108	17.712	20.6781	20.1778	19.9644	19.9545	20.086	20.6611	20.7234	20.3868	20.5176	20.2927	20.2812
PWP2	Periodic tryptophan protein 2 homolog	902	DPLGSEEEAEASEDDSLHLLGGGGRDSEEEM	RS(0.001)LDPLGS(0.999)EEEAEAS(1)EDDS(1)LHLLGGGGRDS(1)EEEMLA	1;2;3;4	NaN	NaN	NaN	NaN	NaN	NaN	NaN	NaN	NaN	NaN	NaN	NaN	NaN	NaN	NaN	NaN	NaN	NaN	NaN	NaN	NaN	NaN	16.4233	16.9633	17.0189	17.0363	16.8011	16.7356	16.195	16.7542	16.5452	16.8198	16.5361	NaN	NaN	NaN	NaN	NaN	NaN	NaN	NaN	NaN	NaN	NaN
PWP2	Periodic tryptophan protein 2 homolog	913	SEDDSLHLLGGGGRDSEEEMLA_________	RS(0.001)LDPLGS(0.999)EEEAEAS(1)EDDS(1)LHLLGGGGRDS(1)EEEMLA	1;2;3;4	NaN	NaN	NaN	NaN	NaN	NaN	NaN	NaN	NaN	NaN	NaN	NaN	NaN	NaN	NaN	NaN	NaN	NaN	NaN	NaN	NaN	NaN	15.7594	16.0305	16.0537	15.9407	16.1382	15.8056	15.4604	15.6129	15.2551	15.5934	15.6222	16.1223	16.9557	16.7165	16.5998	16.6321	16.2763	16.0727	15.9591	15.5494	15.8708	16.0034
LOC102724428;SIK1	Serine/threonine-protein kinase SIK1	575	GAVLLPVSFQEGRRASDTSLTQGLKAFRQQL	RAS(0.994)DT(0.005)S(0.001)LTQGLK	1	NaN	NaN	NaN	NaN	NaN	NaN	NaN	NaN	NaN	NaN	NaN	NaN	NaN	NaN	NaN	NaN	NaN	NaN	NaN	NaN	NaN	NaN	NaN	NaN	NaN	NaN	NaN	NaN	NaN	NaN	NaN	NaN	NaN	16.3624	16.7783	16.7508	16.6693	16.5196	16.5615	16.36	16.4728	16.0542	16.5951	16.4506
MECOM	MDS1 and EVI1 complex locus protein EVI1	436	KEKFKENGKMFKDKVSPLQNLASINNKKEYS	DKVS(1)PLQNLASINNKK	1	17.0707	17.5021	17.5547	17.4809	17.6026	18.0059	17.7713	17.3354	17.8725	17.6175	17.7855	17.8311	18.1614	18.0413	18.1921	18.1421	18.507	18.472	18.2039	18.4831	17.9785	18.387	16.9698	17.1093	17.342	17.1718	17.0868	17.2501	17.5265	17.456	17.3027	17.5831	17.3835	18.0671	17.9715	18.2242	18.2354	17.9677	18.3212	18.5786	18.4292	18.2252	18.5904	18.4332
MECOM	MDS1 and EVI1 complex locus protein EVI1	538	PDRDLRSLPLKMEPQSPGEVKKLQKGSSESP	MEPQS(1)PGEVKK	1	19.6543	19.7438	19.6339	19.6795	19.7512	19.8215	19.8694	19.673	19.9642	19.7007	19.6674	20.9549	20.9239	20.8033	20.9238	21.0236	21.4703	21.1743	21.0495	21.3505	21.1078	21.1676	18.9229	19.0547	19.0896	18.9407	18.8821	18.9377	18.9796	19.008	18.7795	19.0292	19.1311	21.0837	20.8651	20.7753	20.9293	20.9509	21.1689	21.2845	21.2361	21.0072	21.4626	21.0495
MECOM	MDS1 and EVI1 complex locus protein EVI1	851	TEIRNFIGNSNHGSQSPRNVEERMNGSHFKD	NFIGNSNHGSQS(1)PR	1	16.5388	16.7942	16.9443	16.6472	16.8379	17.0745	17.0055	16.9703	17.1161	16.5331	16.8973	NaN	NaN	NaN	NaN	NaN	NaN	NaN	NaN	NaN	NaN	NaN	NaN	NaN	NaN	NaN	NaN	NaN	NaN	NaN	NaN	NaN	NaN	16.8838	17.0539	17.0457	17.0179	16.9806	17.0049	17.0929	17.1333	16.9624	17.0541	17.0728
MECOM	MDS1 and EVI1 complex locus protein EVI1	934	DDYEETSALEMSCKTSPVRYKEEEYKSGLSA	T(0.11)S(0.89)PVRYK	1	NaN	NaN	NaN	NaN	NaN	NaN	NaN	NaN	NaN	NaN	NaN	20.4925	20.8135	20.7644	20.7851	20.6954	18.968	20.9262	20.8485	21.0712	20.6961	20.9961	18.0297	18.3791	18.2454	18.3561	18.1628	18.3088	18.416	18.4044	18.2925	18.6757	18.4539	21.1244	21.2798	21.4118	21.3406	21.2409	21.4086	21.3509	21.528	21.3307	21.1492	21.4571
ZNF574	Zinc finger protein 574	254	LRATPTKAPAPVVLGSPVVLGPPVGQARVAV	APAPVVLGS(1)PVVLGPPVGQAR	1	17.0681	17.7698	17.6149	17.3359	17.104	17.0917	17.0772	16.7215	17.0851	16.9652	16.8887	18.6037	19.487	19.0574	18.9369	18.8519	18.7334	18.7449	18.3112	18.8832	18.691	18.1242	16.0561	16.1617	16.6618	16.4569	15.9469	16.2671	16.5674	16.1945	16.0639	17.0051	16.1776	18.5246	19.1716	19.185	18.7176	18.5477	18.3083	18.343	18.3374	18.476	18.2827	17.8282
ZNF574	Zinc finger protein 574	203	HLKMMAPQEAVPAEPSPKAPPLSSSTIHYEC	MMAPQEAVPAEPS(1)PK	1	NaN	NaN	NaN	NaN	NaN	NaN	NaN	NaN	NaN	NaN	NaN	19.7181	20.0399	19.6961	19.7279	19.6432	19.5963	19.9539	19.4994	19.7995	19.8727	19.6882	19.0755	19.164	18.7553	18.83	18.5616	19.0784	18.86	18.5752	18.5412	18.5646	18.4145	20.1186	19.9991	19.8904	19.8188	19.4794	20.0756	19.9409	19.7689	19.6522	19.8914	19.486
ZNF574	Zinc finger protein 574	388	AIGRDRRGRRARRNNSGEAGGAATQELFCSA	NNS(1)GEAGGAATQELFCSACDQLFLSPHQLQQHLR	1	18.2521	18.5372	18.3275	18.3246	18.2637	18.4831	18.3529	17.9041	18.4259	18.2891	18.246	17.8867	18.6491	18.518	18.281	18.6718	18.192	17.9471	18.0803	18.3885	18.3751	17.9697	15.1109	15.3739	15.5955	15.8382	15.9142	15.5109	15.1212	15.4389	15.3197	15.6906	15.4208	17.789	18.0256	17.9456	17.9777	17.9613	17.6732	17.818	18.0895	17.7398	18.1073	17.4675
ZNF574	Zinc finger protein 574	624	GERPFPCPDCSKPFNSPANLARHRLTHTGER	PFNS(1)PANLAR	1	NaN	NaN	NaN	NaN	NaN	NaN	NaN	NaN	NaN	NaN	NaN	NaN	NaN	NaN	NaN	NaN	NaN	NaN	NaN	NaN	NaN	NaN	NaN	NaN	NaN	NaN	NaN	NaN	NaN	NaN	NaN	NaN	NaN	18.6547	19.3078	18.7476	18.7056	18.3913	18.9531	18.7454	18.2775	18.49	18.6572	18.3099
ZCCHC11	Terminal uridylyltransferase 4	209	VNIEAVGGEKCALQNSPRSQKQQTCTDNTGD	CALQNS(1)PR	1	21.7108	21.9941	21.9727	21.9576	21.8544	21.807	21.8146	21.7467	21.8152	21.6968	21.7724	21.4891	21.7611	21.7759	21.6914	21.6885	21.8609	21.6035	21.5152	21.7067	21.4385	21.4448	21.4777	21.727	21.6586	21.5188	21.4442	21.6709	21.687	21.4665	21.2297	21.5177	21.5054	21.9151	22.128	22.1293	22.1088	21.9207	21.9741	22.1077	21.8725	21.7205	22.0333	21.768
ZCCHC11	Terminal uridylyltransferase 4	48	TLKARNDKSVKEIENSSPNRNSSKKNKQNDI	EIENS(0.767)S(0.233)PNR	1	17.494	17.722	17.5299	17.5687	17.6872	17.1654	17.4851	17.6021	17.7045	17.6023	17.5055	19.7936	20.1362	19.9409	20.0495	20.045	19.4197	20.1697	19.8718	20.137	19.9166	19.9974	18.3161	18.3523	18.498	18.3869	18.3515	18.6264	18.7367	18.4158	18.2768	18.4007	18.3634	20.6263	20.5449	20.5458	20.6582	20.5492	20.7928	20.5064	20.4754	20.5182	20.2983	20.5187
ZCCHC11	Terminal uridylyltransferase 4	49	LKARNDKSVKEIENSSPNRNSSKKNKQNDIC	EIENS(0.011)S(0.989)PNRNSSK	1	20.7387	20.9358	20.8763	20.8739	20.8425	20.7619	20.9452	20.8849	20.9836	20.8607	20.8068	22.3635	22.5146	22.5327	22.4603	22.4507	22.6944	22.5497	22.478	22.6904	22.4612	22.3789	20.0929	20.2965	20.3244	20.1644	19.9745	20.2896	20.2835	20.1333	20.0674	20.2927	20.2061	21.4899	21.4065	21.5081	21.5358	21.4183	21.6874	21.8132	21.6058	21.448	21.7384	21.526
ZCCHC11	Terminal uridylyltransferase 4	839	TCLKKELSQCNCIDLSKSPDPDKSTGTDCRS	ELSQCNCIDLS(0.835)KS(0.165)PDPDK	1	NaN	NaN	NaN	NaN	NaN	NaN	NaN	NaN	NaN	NaN	NaN	NaN	NaN	NaN	NaN	NaN	NaN	NaN	NaN	NaN	NaN	NaN	NaN	NaN	NaN	NaN	NaN	NaN	NaN	NaN	NaN	NaN	NaN	NaN	NaN	NaN	NaN	NaN	NaN	NaN	NaN	NaN	NaN	NaN
ZCCHC11	Terminal uridylyltransferase 4	841	LKKELSQCNCIDLSKSPDPDKSTGTDCRSNL	ELSQCNCIDLS(0.017)KS(0.983)PDPDK	1	NaN	NaN	NaN	NaN	NaN	NaN	NaN	NaN	NaN	NaN	NaN	NaN	NaN	NaN	NaN	NaN	NaN	NaN	NaN	NaN	NaN	NaN	21.0166	19.0713	18.9694	18.807	18.9148	21.3207	21.9215	21.2633	21.0543	22.1845	21.3645	21.6037	20.1779	19.8752	20.0511	19.8727	21.8105	22.234	21.9057	21.6153	22.5364	21.8312
ZCCHC11	Terminal uridylyltransferase 4	104	VLRDQSHCKAKKFPNSPVKAEKATISQAKSE	KFPNS(1)PVK	1	20.4836	20.9023	20.8889	20.7374	20.736	20.5369	20.5054	20.5832	20.4752	20.5542	20.3689	21.344	21.6962	21.5865	21.6671	21.6402	21.493	21.5262	21.3037	21.4823	21.2861	21.277	21.5334	21.9112	21.8324	21.6949	21.5232	21.6548	21.6388	21.3796	21.4473	21.5289	21.4467	22.2389	22.5571	22.5202	22.3623	22.2336	22.3282	22.2283	22.0664	22.076	22.1369	22.1108
ZCCHC11	Terminal uridylyltransferase 4	1324	PKRKSSLLFRLKKKDSEEEKEGNEEEKDSRD	KKDS(1)EEEK	1	20.8602	19.9023	19.9445	20.0293	19.9904	20.3319	21.1459	20.9931	21.1195	21.16	21.1061	17.8396	18.2166	18.1149	18.0903	18.0231	18.486	18.321	18.1565	18.3377	18.2206	18.2963	20.1556	19.1376	18.9945	19.0603	18.9654	20.2714	20.2536	20.329	20.101	19.9349	20.3002	21.3506	20.1956	19.8773	20.1904	20.0667	21.6026	21.4756	21.55	21.3891	21.127	21.6223
ZCCHC11	Terminal uridylyltransferase 4	296	EERLERDHIFRLEKRSPEYTNCRYLCKLCLI	RS(1)PEYTNCR	1	17.7325	17.7569	17.6145	17.6625	17.7808	17.9081	17.9156	17.4859	17.687	17.5822	17.4683	NaN	NaN	NaN	NaN	NaN	NaN	NaN	NaN	NaN	NaN	NaN	16.115	15.9284	15.5897	15.7637	15.4045	16.0237	15.753	15.4976	15.4881	16.0721	15.3077	19.1423	19.7844	19.3746	19.3604	19.336	19.2848	18.8841	19.4367	19.2519	19.5435	19.4284
ZCCHC11	Terminal uridylyltransferase 4	156	EKASSYQMKSEKVPSSPAEAEKGPSLLLKDM	VPS(0.001)S(0.999)PAEAEK	1	NaN	NaN	NaN	NaN	NaN	NaN	NaN	NaN	NaN	NaN	NaN	21.935	22.2654	21.7533	22.1132	21.9665	21.9146	21.8112	21.3687	21.8679	21.6493	21.3885	18.6832	18.7992	18.4521	18.3659	18.1225	18.6234	18.3516	18.0188	18.0172	18.2744	17.8168	NaN	NaN	NaN	NaN	NaN	NaN	NaN	NaN	NaN	NaN	NaN
ZBTB34	Zinc finger and BTB domain-containing protein 34	463	NQHLRKNHPGVAEVRSRIESPERTDVYVEQK	S(0.809)RIES(0.123)PERT(0.068)DVYVEQK	1	19.5979	20.0037	19.9683	19.9988	19.757	18.8935	19.9219	19.6911	19.968	19.9205	19.9142	20.8238	20.937	20.9699	21.0396	21.0872	19.8777	21.1672	20.8506	21.058	21.0796	21.1644	NaN	NaN	NaN	NaN	NaN	NaN	NaN	NaN	NaN	NaN	NaN	21.1819	21.3508	21.3305	21.279	21.2821	21.4695	21.2782	21.4509	21.0888	20.7231	21.3956
ZBTB34	Zinc finger and BTB domain-containing protein 34	467	RKNHPGVAEVRSRIESPERTDVYVEQKLEND	S(0.033)RIES(0.943)PERT(0.024)DVYVEQK	1	19.4723	19.676	19.6326	19.5563	19.5598	18.9779	19.6459	19.5555	19.6986	19.5453	19.5542	NaN	NaN	NaN	NaN	NaN	NaN	NaN	NaN	NaN	NaN	NaN	20.9753	20.9775	20.9501	20.9009	20.9228	21.0572	20.7807	20.9998	20.7723	20.4876	20.9767	20.3232	20.706	20.4182	20.1891	20.7029	20.4461	20.3112	20.6379	20.4059	19.8479	20.5199
SETD8	N-lysine methyltransferase SETD8	50	GENVFTGQSKIYSYMSPNKCSGMRFPLQEEN	IYSYMS(1)PNK	1	16.874	17.6386	16.8218	17.0013	16.9156	17.3596	16.9572	16.6778	17.0922	16.7737	16.5515	17.4823	18.2408	17.6239	17.605	17.6716	17.9854	17.7702	17.3064	17.7356	17.4049	17.2356	NaN	NaN	NaN	NaN	NaN	NaN	NaN	NaN	NaN	NaN	NaN	19.4181	19.8156	19.3212	19.2491	18.9986	19.5924	19.3011	19.0704	19.0919	19.3272	18.9193
SPRY4	Protein sprouty homolog 4	148	RLLDHMAPPPVADQASPRAVRIQPKVVHCQP	LLDHMAPPPVADQAS(1)PR	1	16.2168	16.6065	16.3588	16.5318	16.5242	16.4921	16.3985	16.4361	17.1985	16.4591	16.6226	18.9823	20.506	20.6033	20.6158	20.4238	19.1881	19.156	19.326	19.4892	19.2684	19.2184	NaN	NaN	NaN	NaN	NaN	NaN	NaN	NaN	NaN	NaN	NaN	NaN	NaN	NaN	NaN	NaN	NaN	NaN	NaN	NaN	NaN	NaN
DLG1		636	RLKTVKFNSKTRDKGSFNDKRKKNLFSRKFP	DKGS(1)FNDK	1	NaN	NaN	NaN	NaN	NaN	NaN	NaN	NaN	NaN	NaN	NaN	18.4922	18.4623	18.5938	18.5112	18.3827	20.7064	18.6257	18.6784	18.6642	18.3968	18.5047	18.9601	18.7647	18.828	18.9686	18.8429	19.1202	19.2693	19.2793	18.9713	19.4873	19.051	NaN	NaN	NaN	NaN	NaN	NaN	NaN	NaN	NaN	NaN	NaN
DLG1	Disks large homolog 1	573	HDLREQMMNSSISSGSGSLRTSQKRSLYVRA	EQMMNSSISS(0.063)GS(0.577)GS(0.359)LRTSQK	1	NaN	NaN	NaN	NaN	NaN	NaN	NaN	NaN	NaN	NaN	NaN	16.6486	17.0721	17.3079	16.9864	17.0083	16.0665	17.027	17.2009	17.0523	17.2135	16.9361	NaN	NaN	NaN	NaN	NaN	NaN	NaN	NaN	NaN	NaN	NaN	NaN	NaN	NaN	NaN	NaN	NaN	NaN	NaN	NaN	NaN	NaN
DLG1	Disks large homolog 1	575	LREQMMNSSISSGSGSLRTSQKRSLYVRALF	EQMMNSSISSGS(0.023)GS(0.977)LRTSQK	1	NaN	NaN	NaN	NaN	NaN	NaN	NaN	NaN	NaN	NaN	NaN	NaN	NaN	NaN	NaN	NaN	NaN	NaN	NaN	NaN	NaN	NaN	17.872	18.0223	18.4279	17.888	17.9164	18.1116	18.3587	18.0116	17.7161	18.0565	18.0006	17.8946	18.2769	18.5574	18.3145	18.1575	18.353	18.4543	18.0421	17.8289	18.1734	17.9777
DLG1	Disks large homolog 1	619	GLNFKFGDILHVINASDDEWWQARQVTPDGE	FGDILHVINAS(1)DDEWWQAR	1	16.2857	16.5753	16.4389	16.3744	16.5095	16.7828	16.5678	16.3719	16.4964	16.4794	16.5222	16.8489	17.047	16.9615	17.113	17.1764	17.2435	17.3051	17.0707	17.4282	17.1427	17.15	13.8614	14.0714	14.4949	13.9133	14.148	14.538	14.3889	14.1459	13.7665	14.5525	14.3149	NaN	NaN	NaN	NaN	NaN	NaN	NaN	NaN	NaN	NaN	NaN
DLG1	Disks large homolog 1	155	KNLSEIENVHGFVSHSHISPIKANPPPVLVN;KNLSEIENVHGFVSHSHISPIKPTEAVLPSP	NLSEIENVHGFVS(0.002)HS(0.627)HIS(0.371)PIK	1	NaN	NaN	NaN	NaN	NaN	NaN	NaN	NaN	NaN	NaN	NaN	NaN	NaN	NaN	NaN	NaN	NaN	NaN	NaN	NaN	NaN	NaN	NaN	NaN	NaN	NaN	NaN	NaN	NaN	NaN	NaN	NaN	NaN	NaN	NaN	NaN	NaN	NaN	NaN	NaN	NaN	NaN	NaN	NaN
DLG1	Disks large homolog 1	158	SEIENVHGFVSHSHISPIKANPPPVLVNTDS;SEIENVHGFVSHSHISPIKPTEAVLPSPPTV	NLSEIENVHGFVSHSHIS(1)PIK	1	18.5815	18.4057	18.7427	18.0657	18.4664	18.8483	18.2477	18.3198	17.8086	18.1183	18.0692	20.5339	20.2835	20.5464	19.7733	20.1551	20.5001	19.9413	19.8553	19.1847	19.8477	19.4533	NaN	NaN	NaN	NaN	NaN	NaN	NaN	NaN	NaN	NaN	NaN	NaN	NaN	NaN	NaN	NaN	NaN	NaN	NaN	NaN	NaN	NaN
DLG1	Disks large homolog 1	598	SLYVRALFDYDKTKDSGLPSQGLNFKFGDIL	T(0.21)KDS(0.784)GLPS(0.006)QGLNFK	1	NaN	NaN	NaN	NaN	NaN	NaN	NaN	NaN	NaN	NaN	NaN	NaN	NaN	NaN	NaN	NaN	NaN	NaN	NaN	NaN	NaN	NaN	NaN	NaN	NaN	NaN	NaN	NaN	NaN	NaN	NaN	NaN	NaN	16.6217	16.7243	17.1105	17.0608	16.5185	16.5854	16.9298	17.1429	17.1381	17.3585	17.0791
ING1	Inhibitor of growth protein;Inhibitor of growth protein 1	316	NRENASSNHDHDDGASGTPKEKKAKTSKKKK	NNENRENASSNHDHDDGAS(0.661)GT(0.339)PK	1	NaN	NaN	NaN	NaN	NaN	NaN	NaN	NaN	NaN	NaN	NaN	NaN	NaN	NaN	NaN	NaN	NaN	NaN	NaN	NaN	NaN	NaN	NaN	NaN	NaN	NaN	NaN	NaN	NaN	NaN	NaN	NaN	NaN	NaN	NaN	NaN	NaN	NaN	NaN	NaN	NaN	NaN	NaN	NaN
NELFA	Negative elongation factor A	367	SSREASRPPEEPSAPSPTLPAQFKQRAPMYN	EASRPPEEPSAPS(1)PTLPAQFK	1	20.5509	20.9129	20.6476	20.5552	20.4726	20.7213	20.7193	20.2269	20.5834	20.5676	20.2708	21.5192	21.8797	21.6836	21.548	21.2571	21.6381	21.6394	21.1039	21.4178	21.3088	21.1074	21.698	21.8098	21.5467	21.5369	21.33	21.7827	21.5749	21.3121	21.4377	21.6379	21.358	21.8198	22.126	21.6985	21.7299	21.2402	21.8562	21.8097	21.2229	21.3108	21.7549	21.2378
NELFA	Negative elongation factor A	229	TTTPLKGIPKQAPFRSPTAPSVFSPTGNRTP	QAPFRS(0.985)PT(0.015)APSVFSPTGNR	1	15.7143	15.7682	15.6845	15.6014	15.8552	16.1839	15.9752	15.5954	15.8198	15.6556	15.8215	17.206	17.4072	17.4849	17.3283	17.4018	17.5929	17.3381	17.3691	17.5588	17.449	17.4636	15.682	15.708	15.6884	15.4189	15.5887	15.4894	15.7407	15.3976	15.458	16.4388	15.4665	15.571	16.1967	15.8227	15.3397	15.5706	15.7823	15.9783	16.0054	15.6837	16.1453	15.7491
GPRC5C	G-protein coupled receptor family C group 5 member C	68	SVYQPTEMALMHKVPSEGAYDIILPRATANS	VPS(1)EGAYDIILPR	1	NaN	NaN	NaN	NaN	NaN	NaN	NaN	NaN	NaN	NaN	NaN	NaN	NaN	NaN	NaN	NaN	NaN	NaN	NaN	NaN	NaN	NaN	NaN	NaN	NaN	NaN	NaN	NaN	NaN	NaN	NaN	NaN	NaN	17.8817	17.3728	17.5959	17.3558	17.3188	17.1801	17.8257	17.7737	17.681	17.7749	17.1726
STX1A	Syntaxin-1A	14	__MKDRTQELRTAKDSDDDDDVAVTVDRDRF	T(0.096)AKDS(0.904)DDDDDVAVTVDRDR	1	17.5379	17.9485	17.8828	18.1526	17.8668	18.1203	18.0667	17.9013	18.2189	18.1625	18.2455	NaN	NaN	NaN	NaN	NaN	NaN	NaN	NaN	NaN	NaN	NaN	NaN	NaN	NaN	NaN	NaN	NaN	NaN	NaN	NaN	NaN	NaN	NaN	NaN	NaN	NaN	NaN	NaN	NaN	NaN	NaN	NaN	NaN
C14orf93	Uncharacterized protein C14orf93	105	PGSTGELRHSLGLTVSPCRTRGSGQKNSRRK	HSLGLTVS(1)PCR	1	NaN	NaN	NaN	NaN	NaN	NaN	NaN	NaN	NaN	NaN	NaN	NaN	NaN	NaN	NaN	NaN	NaN	NaN	NaN	NaN	NaN	NaN	NaN	NaN	NaN	NaN	NaN	NaN	NaN	NaN	NaN	NaN	NaN	NaN	NaN	NaN	NaN	NaN	NaN	NaN	NaN	NaN	NaN	NaN
[truncated: 41,149 more rows]
[truncated: 36 more columns]

## Sheet: B. Phosphoproteomics processed
Gene names	Protein names	Protein	Position	Sequence window	Phospho (STY) Probabilities	Number of Phospho (STY)	PP1-rep1	Ph1-rep1	Ph2-rep1	Ph3-rep1	Ph4-rep1	SPN-rep1	NEB-rep1	15A-rep1	15B-rep1	PNUTS-rep1	EMPTY-rep1	PP1-rep2	Ph1-rep2	Ph2-rep2	Ph3-rep2	Ph4-rep2	SPN-rep2	NEB-rep2	15A-rep2	15B-rep2	PNUTS-rep2	EMPTY-rep2	PP1-rep3	Ph1-rep3	Ph2-rep3	Ph3-rep3	Ph4-rep3	SPN-rep3	NEB-rep3	15A-rep3	15B-rep3	PNUTS-rep3	EMPTY-rep3	Amino acid	Charge	Protein group IDs	Multiplicity	GOBP name	GOMF name	GOCC name	Motifs	Localization prob	PEP
[truncated: 15,620 more rows]
[truncated: 6 more columns]

[truncated: 4 more sheets: C. PP1vEmpty, D. PhactrsvPP1, E. other PIPs, F. Total proteomics]
